# Supplementary material for: Molecular characterization of early-stage multi-primary lung adenocarcinoma by transcriptome sequencing—a retrospective study
Source: PeerJ. 2026 Jan 15;14:e20617. doi: 10.7717/peerj.20617 (PMC12812280; doi:10.7717/peerj.20617)
Supplement: Supplemental Information 2 [file peerj-14-20617-s002.xlsx]

## Sheet: Sheet1
gene_id	gene_name	transcript_id	GO	KEGG	KO_ENTRY	EC	Description	trans_type	FPKM.M_8_T1	FPKM.M_8_T2	FPKM.M_1_T2	FPKM.M_3_T1	FPKM.M_3_T2	FPKM.M_7_T2	FPKM.M_1_T1	FPKM.M_2_T1	FPKM.M_2_T2	FPKM.M_5_T1	FPKM.M_4_T1	FPKM.M_4_T2	FPKM.M_7_T1	FPKM.M_5_T2	FPKM.M_6_T1	FPKM.M_6_T2	FPKM.S_3_T	FPKM.S_8_T	FPKM.S_4_T	FPKM.S_1_T	FPKM.S_5_T	FPKM.S_2_T	FPKM.S_7_T	FPKM.S_6_T	fc	log2(fc)	pval	qval	regulation	significant
MSTRG.73550	AOC1	ENST00000416793;ENST00000360937;ENST00000467291;ENST00000483043;ENST00000493429;ENST00000460213	GO:0005507(copper ion binding);GO:0005509(calcium ion binding);GO:0005515(protein binding);GO:0005576(extracellular region);GO:0005615(extracellular space);GO:0005777(peroxisome);GO:0005886(plasma membrane);GO:0005923(bicellular tight junction);GO:0006805(xenobiotic metabolic process);GO:0008131(primary amine oxidase activity);GO:0008144(drug binding);GO:0008201(heparin binding);GO:0008270(zinc i…	00330(Arginine and proline metabolism);00340(Histidine metabolism);00380(Tryptophan metabolism);00380(Tryptophan metabolism)	NA	NA	amine oxidase copper containing 1 [Source:HGNC Symbol;Acc:HGNC:80]	protein_coding	0.321043	0.245093	0.289768	0.144913	0.366269	0.420597	1.00782	0.29539	0.150449	0.415117	0.131219	0.521951	0.494865	0.844957	0.198199	0.902138	16.3319	0.433179	0.506597	0.611374	0.725017	23.3244	0.204701	9.51691	0.0653365	-3.93597	1.70723e-10	9.8213e-08	down	yes
MSTRG.61343	ADAMTS16	ENST00000274181;ENST00000511368	GO:0001658(branching involved in ureteric bud morphogenesis);GO:0003073(regulation of systemic arterial blood pressure);GO:0004222(metalloendopeptidase activity);GO:0005576(extracellular region);GO:0006508(proteolysis);GO:0008233(peptidase activity);GO:0008237(metallopeptidase activity);GO:0016787(hydrolase activity);GO:0030198(extracellular matrix organization);GO:0031012(extracellular matrix);G…	NA	K08630	EC:3.4.24.-	ADAM metallopeptidase with thrombospondin type 1 motif 16 [Source:HGNC Symbol;Acc:HGNC:17108]	protein_coding	0.280615	0.232104	0.35848	0.0414752	0.305414	0.234613	0.48451	0.200144	0.311943	0.180235	0.0340284	0.588886	0.0401887	0.636031	0.224337	0.0795256	1.93824	6.32553	1.45592	2.6715	2.78905	5.72588	0.0275981	0.239708	0.0999491	-3.32266	2.21815e-09	1.22879e-06	down	yes
MSTRG.5783	LRRC7	ENST00000651989	GO:0005515(protein binding);GO:0005654(nucleoplasm);GO:0005813(centrosome);GO:0005829(cytosol);GO:0005886(plasma membrane)	NA	NA	NA	leucine rich repeat containing 7 [Source:HGNC Symbol;Acc:HGNC:18531]	protein_coding	0.0160774	0.0096484	0.00951313	0.00960597	0.0304176	0.00947528	0.00911607	0.0100611	0.0160472	0.0221836	0.00933313	0.0109555	0.0100762	0.0112506	0.0051676	0.00626585	0.0146936	0.00507374	0.0106113	0.0144502	0.0257363	1.71351	0.0150382	0.012657	0.0538685	-4.21441	7.31515e-09	3.95472e-06	down	yes
MSTRG.14162	MUC5AC	ENST00000621226	GO:0002223(stimulatory C-type lectin receptor signaling pathway);GO:0005201(extracellular matrix structural constituent);GO:0005515(protein binding);GO:0005576(extracellular region);GO:0005615(extracellular space);GO:0005737(cytoplasm);GO:0005796(Golgi lumen);GO:0005886(plasma membrane);GO:0016266(O-glycan processing);GO:0048015(phosphatidylinositol-mediated signaling);GO:0070062(extracellular ex…	04657(IL-17 signaling pathway)	K21125	NA	mucin 5AC, oligomeric mucus/gel-forming [Source:HGNC Symbol;Acc:HGNC:7515]	protein_coding	0.0539488	0.0446805	0.273311	0.0554104	0.0193119	0.764496	11.9578	1.16491	0.0746736	0.557027	70.1845	16.1497	0.106235	0.0656977	0.0369654	0.671203	0.0681436	0.0702168	0.0591501	0.0300789	0.00507439	0.250661	0.123027	0.00634136	83.3858	6.38173	9.71237e-09	5.1575e-06	up	yes
MSTRG.28750	CILP	ENST00000261883	GO:0005201(extracellular matrix structural constituent);GO:0005576(extracellular region);GO:0005615(extracellular space);GO:0010629(negative regulation of gene expression);GO:0016311(dephosphorylation);GO:0043569(negative regulation of insulin-like growth factor receptor signaling pathway);GO:0060392(negative regulation of SMAD protein signal transduction);GO:0062023(collagen-containing extracell…	NA	NA	NA	cartilage intermediate layer protein [Source:HGNC Symbol;Acc:HGNC:1980]	protein_coding	0.29591	0.299964	0.574261	0.150116	0.196939	0.915399	0.808683	0.280788	0.567187	0.580538	0.397874	0.927486	0.222018	1.47471	0.243636	0.135588	0.580557	18.9546	6.45351	6.65076	15.504	0.298448	0.118379	0.124591	0.0828912	-3.59264	2.40244e-08	1.24625e-05	down	yes
MSTRG.28040	DUOX1	ENST00000561166;ENST00000558322;ENST00000321429;ENST00000389037	GO:0004601(peroxidase activity);GO:0005509(calcium ion binding);GO:0005515(protein binding);GO:0005783(endoplasmic reticulum);GO:0005886(plasma membrane);GO:0006590(thyroid hormone generation);GO:0006952(defense response);GO:0006979(response to oxidative stress);GO:0009986(cell surface);GO:0016020(membrane);GO:0016021(integral component of membrane);GO:0016174(NAD(P)H oxidase (H(2)O(2)-forming ac…	NA	K13411	1.11.1.-;EC:1.6.3.1	dual oxidase 1 [Source:HGNC Symbol;Acc:HGNC:3062]	protein_coding	2.84642	13.3179	5.05805	25.6632	8.88163	6.54104	6.23443	11.3779	4.25756	5.59707	7.5038	2.17315	11.4156	7.71417	7.33351	9.23419	2.22244	0.697721	1.39265	4.33266	3.10598	2.81302	1.71061	2.83529	3.53603	1.82213	2.60657e-08	1.34438e-05	up	yes
MSTRG.62090	ESM1	ENST00000381405;ENST00000601836	GO:0001525(angiogenesis);GO:0002040(sprouting angiogenesis);GO:0005171(hepatocyte growth factor receptor binding);GO:0005178(integrin binding);GO:0005515(protein binding);GO:0005520(insulin-like growth factor binding);GO:0005576(extracellular region);GO:0008284(positive regulation of cell population proliferation);GO:1902204(positive regulation of hepatocyte growth factor receptor signaling pathw…	NA	NA	NA	endothelial cell specific molecule 1 [Source:HGNC Symbol;Acc:HGNC:3466]	protein_coding	0.0632805	0.0725431	0.0108339	0.0315419	0.108012	0.00899798	0.0354864	0.00830722	0.0318416	0.0187638	0.111446	0.130362	0.00912657	0.0588442	0.00640591	0.0132564	1.21364	1.29925	0.0608231	0.0781541	0.180046	0.585037	0.0463525	0.079563	0.101479	-3.30075	5.55332e-08	2.83165e-05	down	yes
MSTRG.25081	TRIM9	ENST00000360392;ENST00000298355;ENST00000338969	GO:0000149(SNARE binding);GO:0005515(protein binding);GO:0005737(cytoplasm);GO:0005856(cytoskeleton);GO:0008021(synaptic vesicle);GO:0008270(zinc ion binding);GO:0016079(synaptic vesicle exocytosis);GO:0016567(protein ubiquitination);GO:0016740(transferase activity);GO:0019904(protein domain specific binding);GO:0030054(cell junction);GO:0030425(dendrite);GO:0031410(cytoplasmic vesicle);GO:003554…	NA	K10649	NA	tripartite motif containing 9 [Source:HGNC Symbol;Acc:HGNC:16288]	protein_coding	0.0217573	0.0322274	0.00958967	0.019368	0.0103879	0.0319143	0.104162	0.0266191	0.168158	0.0345464	0.0102426	0.110104	0.0165197	0.0218497	0.0209167	0.00319217	0.192321	0.0817064	0.0550991	0.0387912	0.188291	6.05015	0.0276022	0.0828696	0.0477573	-4.38814	6.88708e-08	3.49191e-05	down	yes
MSTRG.29309	LINGO1	ENST00000355300;ENST00000561030;ENST00000561686	GO:0005154(epidermal growth factor receptor binding);GO:0005515(protein binding);GO:0005615(extracellular space);GO:0005886(plasma membrane);GO:0016020(membrane);GO:0016021(integral component of membrane);GO:0031012(extracellular matrix);GO:0050771(negative regulation of axonogenesis);GO:0050771(negative regulation of axonogenesis)	NA	NA	NA	leucine rich repeat and Ig domain containing 1 [Source:HGNC Symbol;Acc:HGNC:21205]	protein_coding	0.188614	0.163004	0.0322389	0.0519674	0.0975656	0.202573	0.17707	0.0756159	0.0334592	0.0542976	0.0465685	0.107522	0.171055	0.170417	0.0311632	0.0776912	0.291337	1.53077	1.00321	0.255045	0.373601	0.502836	0.0778672	0.65868	0.179065	-2.48145	7.66597e-08	3.84339e-05	down	yes
MSTRG.46238	COL3A1	ENST00000304636	GO:0001501(skeletal system development);GO:0001568(blood vessel development);GO:0002020(protease binding);GO:0005178(integrin binding);GO:0005201(extracellular matrix structural constituent);GO:0005515(protein binding);GO:0005576(extracellular region);GO:0005581(collagen trimer);GO:0005586(collagen type III trimer);GO:0005615(extracellular space);GO:0005788(endoplasmic reticulum lumen);GO:0007160…	04611(Platelet activation);04926(Relaxin signaling pathway);04933(AGE-RAGE signaling pathway in diabetic complications);04974(Protein digestion and absorption);05146(Amoebiasis)	K19720	NA	collagen type III alpha 1 chain [Source:HGNC Symbol;Acc:HGNC:2201]	protein_coding	49.6045	55.7163	40.014	27.0429	37.2335	26.9627	50.0482	19.6909	36.8078	21.2689	15.625	68.0075	11.502	71.1266	24.4172	39.5354	110.198	489.041	162.144	191.211	314.645	64.9196	57.5753	11.0784	0.212235	-2.23627	7.96939e-08	3.95136e-05	down	yes
MSTRG.62095	GPX8	ENST00000503787;ENST00000515370;ENST00000296734	GO:0004601(peroxidase activity);GO:0004602(glutathione peroxidase activity);GO:0005515(protein binding);GO:0005788(endoplasmic reticulum lumen);GO:0006979(response to oxidative stress);GO:0016020(membrane);GO:0016021(integral component of membrane);GO:0016491(oxidoreductase activity);GO:0034599(cellular response to oxidative stress);GO:0055114(oxidation-reduction process);GO:0098869(cellular oxid…	00480(Glutathione metabolism);00590(Arachidonic acid metabolism);04918(Thyroid hormone synthesis);04918(Thyroid hormone synthesis)	K00432	EC:1.11.1.9	glutathione peroxidase 8 (putative) [Source:HGNC Symbol;Acc:HGNC:33100]	protein_coding	0.0316781	0.988265	0.89772	0.337941	0.945309	0.299079	0.776781	0.235071	0.132939	0.637639	0.233275	0.899819	0.209356	1.11196	0.346015	0.770773	5.21869	2.96696	2.0582	1.72194	2.01382	1.61335	1.0806	3.48744	0.219573	-2.18723	1.22965e-07	5.90121e-05	down	yes
MSTRG.39422	UNC13A	ENST00000550896;ENST00000551649;ENST00000519716	GO:0001956(positive regulation of neurotransmitter secretion);GO:0005509(calcium ion binding);GO:0005516(calmodulin binding);GO:0005543(phospholipid binding);GO:0005737(cytoplasm);GO:0005886(plasma membrane);GO:0006887(exocytosis);GO:0007268(chemical synaptic transmission);GO:0007269(neurotransmitter secretion);GO:0007528(neuromuscular junction development);GO:0016020(membrane);GO:0016081(synapti…	04721(Synaptic vesicle cycle);04721(Synaptic vesicle cycle)	K15293	NA	unc-13 homolog A [Source:HGNC Symbol;Acc:HGNC:23150]	protein_coding	0.160165	0.0977807	0.0321448	0.0458169	0.0952764	0.0724286	0.0940329	0.0246639	0.0792348	0.0288877	0.00834852	0.048362	0.107381	0.148938	0.0472608	0.0853769	13.9907	0.0556499	0.0611434	0.0212038	0.0963622	0.023911	0.0484463	0.0948747	0.0408586	-4.61322	1.26811e-07	6.05342e-05	down	yes
MSTRG.20231	KIF5A	ENST00000455537;ENST00000674619;ENST00000676437;ENST00000676250;ENST00000675634;ENST00000675907	GO:0000166(nucleotide binding);GO:0003774(motor activity);GO:0003777(microtubule motor activity);GO:0005515(protein binding);GO:0005524(ATP binding);GO:0005737(cytoplasm);GO:0005829(cytosol);GO:0005856(cytoskeleton);GO:0005871(kinesin complex);GO:0005874(microtubule);GO:0006890(retrograde vesicle-mediated transport, Golgi to endoplasmic reticulum);GO:0007018(microtubule-based movement);GO:0007268…	04144(Endocytosis);04728(Dopaminergic synapse);04728(Dopaminergic synapse)	K10396	NA	kinesin family member 5A [Source:HGNC Symbol;Acc:HGNC:6323]	protein_coding	0.0345684	0.0485265	0.043127	0.0546701	0.0312147	0.0574391	0.0943062	0.0236548	0.0241136	0.02289	0.0203011	0.0360802	0.0545614	0.0214216	0.0452139	0.0402576	0.176674	0.719632	0.0561053	0.0385197	0.0591091	1.71959	0.03821	0.0219001	0.115266	-3.11696	1.83653e-07	8.62909e-05	down	yes
MSTRG.64267	CD14	ENST00000302014;ENST00000401743;ENST00000498971;ENST00000512545	GO:0001530(lipopolysaccharide binding);GO:0001847(opsonin receptor activity);GO:0002224(toll-like receptor signaling pathway);GO:0002237(response to molecule of bacterial origin);GO:0002376(immune system process);GO:0002755(MyD88-dependent toll-like receptor signaling pathway);GO:0002756(MyD88-independent toll-like receptor signaling pathway);GO:0005515(protein binding);GO:0005576(extracellular r…	04010(MAPK signaling pathway);04064(NF-kappa B signaling pathway);04145(Phagosome);04620(Toll-like receptor signaling pathway);04640(Hematopoietic cell lineage);05130(Pathogenic Escherichia coli infection);05132(Salmonella infection);05133(Pertussis);05134(Legionellosis);05146(Amoebiasis);05152(Tuberculosis);05202(Transcriptional misregulation in cancer);05221(Acute myeloid leukemia);05221(Acute …	NA	NA	CD14 molecule [Source:HGNC Symbol;Acc:HGNC:1628]	protein_coding	13.1181	16.3018	8.00671	9.58248	11.762	12.894	10.4372	5.45641	14.1552	11.9485	7.77147	9.70994	10.4015	6.73526	9.10395	22.0775	39.9984	35.7112	42.5337	27.029	33.5946	16.8054	16.9633	16.6724	0.391312	-1.35361	1.95928e-07	9.15792e-05	down	yes
MSTRG.5661	AK4	ENST00000327299;ENST00000545314;ENST00000395334	GO:0000166(nucleotide binding);GO:0001889(liver development);GO:0002082(regulation of oxidative phosphorylation);GO:0004017(adenylate kinase activity);GO:0004550(nucleoside diphosphate kinase activity);GO:0005515(protein binding);GO:0005524(ATP binding);GO:0005525(GTP binding);GO:0005737(cytoplasm);GO:0005739(mitochondrion);GO:0005759(mitochondrial matrix);GO:0006139(nucleobase-containing compoun…	00230(Purine metabolism);00730(Thiamine metabolism);00730(Thiamine metabolism)	NA	NA	adenylate kinase 4 [Source:HGNC Symbol;Acc:HGNC:363]	protein_coding	0.481923	0.266734	0.34849	0.0680056	0.148522	0.201258	0.842624	0.0376136	0.20935	0.137655	0.314865	0.0873175	0.0315781	0.308636	0.00336417	0.151923	3.70115	3.13239	3.06317	0.259934	0.641625	5.45422	0.00706208	1.08439	0.104932	-3.25248	2.07366e-07	9.59258e-05	down	yes
MSTRG.47787	CPXM1	ENST00000380605	GO:0004180(carboxypeptidase activity);GO:0004181(metallocarboxypeptidase activity);GO:0005576(extracellular region);GO:0005615(extracellular space);GO:0006508(proteolysis);GO:0006518(peptide metabolic process);GO:0008233(peptidase activity);GO:0008237(metallopeptidase activity);GO:0008270(zinc ion binding);GO:0016485(protein processing);GO:0016787(hydrolase activity);GO:0046872(metal ion binding)	NA	K08638	EC:3.4.17.-	carboxypeptidase X, M14 family member 1 [Source:HGNC Symbol;Acc:HGNC:15771]	protein_coding	0.715003	1.21461	1.03911	0.285853	0.632173	0.570622	0.66567	0.363859	1.38647	1.14746	0.382358	0.864934	0.398377	0.852384	0.269455	0.942607	2.32502	6.65523	3.31991	3.52438	10.456	1.41705	0.840933	0.117893	0.204683	-2.28854	2.31165e-07	0.000106387	down	yes
MSTRG.39542	CILP2	ENST00000291495;ENST00000586018	GO:0005576(extracellular region);GO:0016311(dephosphorylation);GO:0070062(extracellular exosome);GO:0070062(extracellular exosome)	NA	NA	NA	cartilage intermediate layer protein 2 [Source:HGNC Symbol;Acc:HGNC:24213]	protein_coding	0.674699	0.269686	0.591382	0.209366	0.183128	0.377835	1.29804	0.266692	1.67634	0.384184	0.0728997	0.664283	0.0756497	1.32719	0.348466	0.391197	2.25272	17.1173	2.34186	1.61002	6.28059	1.222	0.629157	0.353737	0.138506	-2.85198	2.38277e-07	0.000109101	down	yes
MSTRG.72708	ANKRD7	ENST00000265224	GO:0005515(protein binding);GO:0005654(nucleoplasm);GO:0005813(centrosome)	NA	NA	NA	ankyrin repeat domain 7 [Source:HGNC Symbol;Acc:HGNC:18588]	protein_coding	0.0139089	0.00871413	0.0115694	0.00825377	0.0330638	0	0.019059	0.0126318	0	0	0	0.0105094	0.0171113	0.075258	0.0285457	0.00695595	0.120986	0.0219421	0.102779	0.0198944	0.054257	4.1874	0.0207774	0.035952	0.0269042	-5.21602	2.7466e-07	0.000125121	down	yes
ENSG00000155886	SLC24A2	ENST00000341998	GO:0001917(photoreceptor inner segment);GO:0005262(calcium channel activity);GO:0005886(plasma membrane);GO:0005887(integral component of plasma membrane);GO:0006811(ion transport);GO:0006813(potassium ion transport);GO:0006814(sodium ion transport);GO:0006816(calcium ion transport);GO:0006874(cellular calcium ion homeostasis);GO:0007601(visual perception);GO:0007612(learning);GO:0007613(memory);…	NA	K13750	NA	solute carrier family 24 member 2 [Source:HGNC Symbol;Acc:HGNC:10976]	protein_coding	0.030965	0.022877	0.077247	0.055521	0.02533	0.011735	0.066708	0.031627	0.078644	0.032666	0.013431	0.025419	0.022279	0.046022	0.008914	0.025833	0.125867	0.778229	0.26442	0.163513	0.25273	0.041813	0.081491	0.010041	0.167399	-2.57864	2.78267e-07	0.000126124	down	yes
MSTRG.97	MXRA5	ENST00000217939	GO:0005201(extracellular matrix structural constituent);GO:0005515(protein binding);GO:0005576(extracellular region);GO:0062023(collagen-containing extracellular matrix);GO:0070062(extracellular exosome);GO:0071559(response to transforming growth factor beta)	NA	NA	NA	matrix remodeling associated 5 [Source:HGNC Symbol;Acc:HGNC:7539]	protein_coding	4.12708	3.72295	4.65772	2.26684	4.08497	2.53667	5.32899	1.73316	3.09145	2.77303	1.53038	8.07393	1.48379	6.4385	1.43883	2.6261	7.212	30.0008	17.0531	9.83869	16.3443	11.987	5.93011	1.87738	0.278893	-1.84222	2.81296e-07	0.000126856	down	yes
MSTRG.72067	COL1A2	ENST00000297268;ENST00000620463	GO:0001501(skeletal system development);GO:0001568(blood vessel development);GO:0002020(protease binding);GO:0005201(extracellular matrix structural constituent);GO:0005515(protein binding);GO:0005576(extracellular region);GO:0005581(collagen trimer);GO:0005584(collagen type I trimer);GO:0005615(extracellular space);GO:0005783(endoplasmic reticulum);GO:0005788(endoplasmic reticulum lumen);GO:0007…	04151(PI3K-Akt signaling pathway);04510(Focal adhesion);04512(ECM-receptor interaction);04611(Platelet activation);04926(Relaxin signaling pathway);04933(AGE-RAGE signaling pathway in diabetic complications);04974(Protein digestion and absorption);05146(Amoebiasis);05165(Human papillomavirus infection);05165(Human papillomavirus infection)	NA	NA	collagen type I alpha 2 chain [Source:HGNC Symbol;Acc:HGNC:2198]	protein_coding	29.691	29.0158	33.4298	25.6263	27.4937	22.5161	32.3808	17.8004	26.7572	16.4605	9.90535	48.6634	15.3226	39.7491	21.036	30.3127	71.2773	237.043	82.1194	86.1606	167.608	79.5503	40.7018	7.1052	0.276167	-1.85639	5.94197e-07	0.00025637	down	yes
MSTRG.2058	NUP62CL	ENST00000372466;ENST00000432145;ENST00000421752	GO:0005515(protein binding);GO:0005543(phospholipid binding);GO:0005643(nuclear pore);GO:0006405(RNA export from nucleus);GO:0006606(protein import into nucleus);GO:0006913(nucleocytoplasmic transport);GO:0015031(protein transport);GO:0017056(structural constituent of nuclear pore);GO:0044613(nuclear pore central transport channel);GO:0044613(nuclear pore central transport channel)	NA	NA	NA	nucleoporin 62 C-terminal like [Source:HGNC Symbol;Acc:HGNC:25960]	protein_coding	0.361521	0.164514	0.405905	0.0340623	0.229653	0.135117	0.258223	0.335853	0.124736	0.496071	0.436463	0.134357	0.317671	0.196015	0.317317	0.147005	0.867165	0.479521	1.33266	0.855307	0.426108	0.443071	0.589739	4.18548	0.223034	-2.16466	6.24879e-07	0.000265775	down	yes
MSTRG.7005	OLFML3	ENST00000393300;ENST00000369551;ENST00000320334	GO:0005576(extracellular region);GO:0007275(multicellular organism development);GO:1903561(extracellular vesicle);GO:1903561(extracellular vesicle)	NA	NA	NA	olfactomedin like 3 [Source:HGNC Symbol;Acc:HGNC:24956]	protein_coding	2.89824	2.79836	3.51242	1.98603	2.78274	0.985325	1.86724	0.813038	2.03452	1.60931	0.457359	0.516096	0.676513	2.57773	0.637456	1.57968	11.5581	5.88561	3.74171	5.26869	5.83843	25.0835	3.86079	0.5718	0.224338	-2.15625	6.30921e-07	0.000267079	down	yes
MSTRG.39240	PODNL1	ENST00000588872;ENST00000254320;ENST00000587954;ENST00000339560;ENST00000538371;ENST00000586075;ENST00000585607;ENST00000588764;ENST00000538517;ENST00000587458;ENST00000591353	GO:0005515(protein binding);GO:0005576(extracellular region);GO:0005615(extracellular space);GO:0062023(collagen-containing extracellular matrix);GO:0062023(collagen-containing extracellular matrix)	NA	NA	NA	podocan like 1 [Source:HGNC Symbol;Acc:HGNC:26275]	protein_coding	0.404951	0.493992	0.465758	0.674434	0.631354	0.617406	0.818071	0.526415	0.2968	0.638288	0.0949951	0.62434	0.772214	0.964574	0.705169	0.539978	7.34382	4.81945	2.32292	2.64593	1.52191	0.625572	0.545055	0.592397	0.226985	-2.13933	9.49152e-07	0.000392533	down	yes
MSTRG.57209	LRRC15	ENST00000347624;ENST00000428839	GO:0001968(fibronectin binding);GO:0005515(protein binding);GO:0005518(collagen binding);GO:0005615(extracellular space);GO:0016020(membrane);GO:0016021(integral component of membrane);GO:0030335(positive regulation of cell migration);GO:0031012(extracellular matrix);GO:0043236(laminin binding);GO:0046813(receptor-mediated virion attachment to host cell);GO:0062023(collagen-containing extracellul…	NA	NA	NA	leucine rich repeat containing 15 [Source:HGNC Symbol;Acc:HGNC:20818]	protein_coding	0.319177	0.329011	0.589315	0.0216819	0.361739	0.190422	0.767785	0.0751348	0.227398	0.339314	0.105073	0.758267	0.0781674	1.33552	0.1676	0.0672056	1.12547	7.39552	2.83629	2.66046	4.75285	0.34348	0.302909	0.259603	0.145676	-2.77916	1.06421e-06	0.000432152	down	yes
MSTRG.16497	ALG8	ENST00000529139;ENST00000376156;ENST00000530454;ENST00000530910;ENST00000532440;ENST00000530608;ENST00000532306;ENST00000525755;ENST00000615266;ENST00000527099;ENST00000526849;ENST00000525870;ENST00000299626	GO:0000033(alpha-1,3-mannosyltransferase activity);GO:0004583(dolichyl-phosphate-glucose-glycolipid alpha-glucosyltransferase activity);GO:0005515(protein binding);GO:0005783(endoplasmic reticulum);GO:0005789(endoplasmic reticulum membrane);GO:0006486(protein glycosylation);GO:0006487(protein N-linked glycosylation);GO:0006488(dolichol-linked oligosaccharide biosynthetic process);GO:0006490(oligo…	00510(N-Glycan biosynthesis);00510(N-Glycan biosynthesis)	K03849	EC:2.4.1.265	ALG8 alpha-1,3-glucosyltransferase [Source:HGNC Symbol;Acc:HGNC:23161]	protein_coding	3.62417	2.89964	3.15773	1.18867	3.04027	1.41086	2.52762	1.29179	2.3087	2.7995	3.70357	2.98583	1.10237	2.86529	1.06766	1.87684	5.1974	73.3178	3.80726	2.67005	2.76055	5.29201	2.3733	3.10099	0.192097	-2.38009	1.37322e-06	0.000542893	down	yes
MSTRG.64854	ATP10B	ENST00000520108;ENST00000327245;ENST00000642502	GO:0000166(nucleotide binding);GO:0000287(magnesium ion binding);GO:0005515(protein binding);GO:0005524(ATP binding);GO:0005783(endoplasmic reticulum);GO:0005789(endoplasmic reticulum membrane);GO:0005886(plasma membrane);GO:0006869(lipid transport);GO:0015914(phospholipid transport);GO:0016020(membrane);GO:0016021(integral component of membrane);GO:0030659(cytoplasmic vesicle membrane);GO:003141…	NA	K01530	EC:7.6.2.1	ATPase phospholipid transporting 10B (putative) [Source:HGNC Symbol;Acc:HGNC:13543]	protein_coding	0.289736	0.588658	0.310813	0.0180445	0.413448	0.111897	0.0952948	0.0367237	0.174185	0.115237	0.189566	0.0514987	0.0125654	0.674875	0.108355	0.0213723	0.541697	0.56235	0.577382	0.0281372	0.378916	10.5097	0.0637422	7.26278	0.0806101	-3.6329	1.47278e-06	0.000577171	down	yes
MSTRG.34286	ALDOC	ENST00000226253;ENST00000395321;ENST00000460201;ENST00000578590;ENST00000435638;ENST00000584086;ENST00000395319	GO:0003824(catalytic activity);GO:0004332(fructose-bisphosphate aldolase activity);GO:0005515(protein binding);GO:0005576(extracellular region);GO:0005829(cytosol);GO:0005856(cytoskeleton);GO:0006000(fructose metabolic process);GO:0006094(gluconeogenesis);GO:0006096(glycolytic process);GO:0008092(cytoskeletal protein binding);GO:0016829(lyase activity);GO:0030388(fructose 1,6-bisphosphate metabol…	00010(Glycolysis / Gluconeogenesis);00030(Pentose phosphate pathway);00051(Fructose and mannose metabolism);00051(Fructose and mannose metabolism)	NA	NA	aldolase, fructose-bisphosphate C [Source:HGNC Symbol;Acc:HGNC:418]	protein_coding	0.775534	0.906681	1.80206	0.710415	1.04636	0.757872	2.86349	0.741008	4.17185	2.32968	0.285266	1.35912	0.921093	1.03535	0.611635	0.991413	7.28204	5.0819	5.02864	1.97037	4.54611	3.97141	1.19596	7.45485	0.291652	-1.77768	1.58583e-06	0.000616091	down	yes
MSTRG.16512	NARS2	ENST00000281038;ENST00000528850;ENST00000529571;ENST00000529771	GO:0000166(nucleotide binding);GO:0003676(nucleic acid binding);GO:0004812(aminoacyl-tRNA ligase activity);GO:0004816(asparagine-tRNA ligase activity);GO:0005524(ATP binding);GO:0005654(nucleoplasm);GO:0005739(mitochondrion);GO:0005759(mitochondrial matrix);GO:0005829(cytosol);GO:0006412(translation);GO:0006418(tRNA aminoacylation for protein translation);GO:0006421(asparaginyl-tRNA aminoacylatio…	00970(Aminoacyl-tRNA biosynthesis);00970(Aminoacyl-tRNA biosynthesis)	K01893	EC:6.1.1.22	asparaginyl-tRNA synthetase 2, mitochondrial [Source:HGNC Symbol;Acc:HGNC:26274]	protein_coding	1.26854	2.11339	2.46444	1.21018	2.62747	1.22825	2.58426	1.60409	1.95195	2.04127	1.58662	1.07706	1.21819	2.84118	1.34625	2.55506	3.19587	59.5774	3.22316	2.40246	2.30394	3.43505	2.11531	1.84971	0.19025	-2.39403	1.78965e-06	0.000683441	down	yes
MSTRG.63604	AP3S1	ENST00000316788	GO:0005515(protein binding);GO:0005794(Golgi apparatus);GO:0006886(intracellular protein transport);GO:0008089(anterograde axonal transport);GO:0008286(insulin receptor signaling pathway);GO:0015031(protein transport);GO:0016020(membrane);GO:0016192(vesicle-mediated transport);GO:0030117(membrane coat);GO:0030119(AP-type membrane coat adaptor complex);GO:0030123(AP-3 adaptor complex);GO:0030133(t…	04142(Lysosome)	NA	NA	adaptor related protein complex 3 subunit sigma 1 [Source:HGNC Symbol;Acc:HGNC:2013]	protein_coding	3.4278	2.81817	2.71919	1.53913	3.15326	1.1531	2.74847	1.24095	1.14724	2.3733	2.66032	2.5302	1.77126	2.5885	1.13073	1.9155	5.3849	4.36091	4.21764	3.19588	3.696	4.68645	2.94222	5.02054	0.52108	-0.940422	1.91156e-06	0.000726903	down	no
MSTRG.35096	RND2	ENST00000587250	GO:0000166(nucleotide binding);GO:0002080(acrosomal membrane);GO:0003924(GTPase activity);GO:0005515(protein binding);GO:0005525(GTP binding);GO:0005737(cytoplasm);GO:0005769(early endosome);GO:0005856(cytoskeleton);GO:0005886(plasma membrane);GO:0005938(cell cortex);GO:0007015(actin filament organization);GO:0007165(signal transduction);GO:0007264(small GTPase mediated signal transduction);GO:00…	NA	NA	NA	Rho family GTPase 2 [Source:HGNC Symbol;Acc:HGNC:18315]	protein_coding	0.241024	0.293202	0.262329	0.116432	0.175391	0.076254	0.201816	0.119823	0.298331	0.107046	0.0819403	0.0990174	0.239704	0.251964	0.127819	0.158256	1.76947	0.540521	0.208784	0.620955	0.213054	0.409865	0.27186	0.566732	0.309737	-1.69088	2.11023e-06	0.000792378	down	yes
MSTRG.64618	RPS14	ENST00000642507;ENST00000407193;ENST00000401695;ENST00000312037;ENST00000521466	GO:0000028(ribosomal small subunit assembly);GO:0000122(negative regulation of transcription by RNA polymerase II);GO:0000184(nuclear-transcribed mRNA catabolic process, nonsense-mediated decay);GO:0000462(maturation of SSU-rRNA from tricistronic rRNA transcript (SSU-rRNA, 5.8S rRNA, LSU-rRNA));GO:0003723(RNA binding);GO:0003735(structural constituent of ribosome);GO:0005515(protein binding);GO:0…	03010(Ribosome);03010(Ribosome)	K02955	NA	ribosomal protein S14 [Source:HGNC Symbol;Acc:HGNC:10387]	protein_coding	18.3605	14.2767	14.1266	12.679	20.0397	11.2151	13.6188	13.2461	12.6357	13.1037	13.5693	10.159	8.63058	18.7542	10.4739	9.84644	22.3716	21.1293	14.7241	28.8192	28.6468	20.1846	27.3092	53.2869	0.49599	-1.01162	2.23991e-06	0.000834093	down	yes
MSTRG.25155	FRMD6	ENST00000554778;ENST00000555197;ENST00000557405;ENST00000344768;ENST00000395718;ENST00000553556;ENST00000356218;ENST00000555703	GO:0003383(apical constriction);GO:0005515(protein binding);GO:0005737(cytoplasm);GO:0005856(cytoskeleton);GO:0005886(plasma membrane);GO:0016020(membrane);GO:0031032(actomyosin structure organization);GO:0032970(regulation of actin filament-based process);GO:0034613(cellular protein localization);GO:0043296(apical junction complex);GO:0043296(apical junction complex)	04390(Hippo signaling pathway);04392(Hippo signaling pathway - multiple species);04392(Hippo signaling pathway - multiple species)	K16822	NA	FERM domain containing 6 [Source:HGNC Symbol;Acc:HGNC:19839]	protein_coding	1.12951	1.07493	1.52712	0.386417	1.38958	0.431582	1.00516	0.393187	0.848257	0.821105	1.27589	1.60181	0.406458	1.17115	0.429146	0.929336	1.52213	4.10127	2.25189	2.19855	3.59168	1.40264	1.42988	1.49519	0.41184	-1.27985	2.9069e-06	0.00106046	down	yes
MSTRG.8122	OLFML2B	ENST00000367940;ENST00000294794;ENST00000367938	GO:0005576(extracellular region);GO:0030198(extracellular matrix organization);GO:0031012(extracellular matrix);GO:0042802(identical protein binding);GO:0050840(extracellular matrix binding);GO:0050840(extracellular matrix binding)	NA	NA	NA	olfactomedin like 2B [Source:HGNC Symbol;Acc:HGNC:24558]	protein_coding	1.20753	1.18729	1.363	1.14538	1.26402	0.917762	0.671311	0.397785	1.20275	0.745932	0.435908	1.68908	1.42696	2.18937	0.680886	1.01859	3.8202	6.57593	4.50056	3.02616	7.03897	2.4345	1.18603	0.463386	0.301999	-1.72739	3.06585e-06	0.00111392	down	yes
MSTRG.62879	RPS23	ENST00000507980;ENST00000296674;ENST00000511844;ENST00000651545;ENST00000512493;ENST00000510210;ENST00000510019	GO:0000184(nuclear-transcribed mRNA catabolic process, nonsense-mediated decay);GO:0002181(cytoplasmic translation);GO:0003723(RNA binding);GO:0003735(structural constituent of ribosome);GO:0005515(protein binding);GO:0005654(nucleoplasm);GO:0005737(cytoplasm);GO:0005783(endoplasmic reticulum);GO:0005791(rough endoplasmic reticulum);GO:0005829(cytosol);GO:0005840(ribosome);GO:0006412(translation)…	03010(Ribosome);03010(Ribosome)	K02973	NA	ribosomal protein S23 [Source:HGNC Symbol;Acc:HGNC:10410]	protein_coding	18.864	16.5049	19.2741	8.08203	15.2353	6.14881	14.4563	9.43276	12.8015	11.691	9.32869	10.215	6.26934	16.1688	6.86742	11.1842	20.9144	21.4213	17.8047	21.2727	25.9645	15.0406	20.6253	38.1591	0.53124	-0.912563	3.30798e-06	0.00119663	down	no
MSTRG.15333	HARBI1	ENST00000326737;ENST00000529192;ENST00000532281	GO:0004518(nuclease activity);GO:0005634(nucleus);GO:0005737(cytoplasm);GO:0005829(cytosol);GO:0005886(plasma membrane);GO:0016787(hydrolase activity);GO:0034451(centriolar satellite);GO:0046872(metal ion binding);GO:0090305(nucleic acid phosphodiester bond hydrolysis);GO:0090305(nucleic acid phosphodiester bond hydrolysis)	NA	K23222	EC:3.1.-.-	harbinger transposase derived 1 [Source:HGNC Symbol;Acc:HGNC:26522]	protein_coding	1.15711	0.684581	0.606609	0.49643	0.77258	0.57497	0.714075	0.570541	0.544396	0.649513	0.456824	0.693958	0.559312	0.716862	0.504401	0.844472	1.68509	1.33536	1.23577	1.00952	1.16852	1.70889	0.749011	0.935394	0.536585	-0.89812	3.32017e-06	0.00119663	down	no
MSTRG.56187	PLOD2	ENST00000494950;ENST00000360060;ENST00000282903;ENST00000461497	GO:0001666(response to hypoxia);GO:0005506(iron ion binding);GO:0005783(endoplasmic reticulum);GO:0005789(endoplasmic reticulum membrane);GO:0006464(cellular protein modification process);GO:0008475(procollagen-lysine 5-dioxygenase activity);GO:0016020(membrane);GO:0016491(oxidoreductase activity);GO:0016705(oxidoreductase activity, acting on paired donors, with incorporation or reduction of mole…	00310(Lysine degradation);00310(Lysine degradation)	K13645	EC:1.14.11.4	procollagen-lysine,2-oxoglutarate 5-dioxygenase 2 [Source:HGNC Symbol;Acc:HGNC:9082]	protein_coding	1.98157	0.581928	0.886	0.442763	0.943424	0.350682	1.7654	0.222902	1.42837	0.541853	0.295739	1.41726	0.446661	0.740665	0.161468	0.617348	9.70221	5.25867	2.62844	0.84494	2.12375	5.94233	0.661641	0.47449	0.232013	-2.10772	3.66724e-06	0.00130082	down	yes
MSTRG.13792	TACC2	ENST00000515603;ENST00000514539;ENST00000368999;ENST00000369000;ENST00000360561;ENST00000490979;ENST00000491540;ENST00000505639;ENST00000515273;ENST00000369004;ENST00000513429;ENST00000334433;ENST00000369005;ENST00000453444;ENST00000496913;ENST00000508411;ENST00000369001	GO:0000226(microtubule cytoskeleton organization);GO:0005634(nucleus);GO:0005654(nucleoplasm);GO:0005737(cytoplasm);GO:0005815(microtubule organizing center);GO:0005829(cytosol);GO:0005856(cytoskeleton);GO:0005886(plasma membrane);GO:0007052(mitotic spindle organization);GO:0008283(cell population proliferation);GO:0021987(cerebral cortex development);GO:0035257(nuclear hormone receptor binding);…	NA	K14282	NA	transforming acidic coiled-coil containing protein 2 [Source:HGNC Symbol;Acc:HGNC:11523]	protein_coding	1.43373	1.80578	2.58376	2.88072	1.78955	1.35767	1.58563	1.50822	1.43201	1.6663	2.80945	2.01202	2.06431	0.984046	3.13562	1.56884	0.651653	0.600407	1.06352	1.24954	0.732153	0.363104	1.10964	1.72274	2.04315	1.03079	3.82561e-06	0.00135062	up	yes
MSTRG.70898	SUGCT	ENST00000335693;ENST00000628514;ENST00000416370;ENST00000401647	GO:0005739(mitochondrion);GO:0008410(CoA-transferase activity);GO:0016740(transferase activity);GO:0047369(succinate-hydroxymethylglutarate CoA-transferase activity);GO:0047369(succinate-hydroxymethylglutarate CoA-transferase activity)	NA	K18703	EC:2.8.3.13	succinyl-CoA:glutarate-CoA transferase [Source:HGNC Symbol;Acc:HGNC:16001]	protein_coding	0.190911	0.170803	0.175501	0.175776	0.319312	0.132275	0.414646	0.0647962	0.148938	0.0500881	0.0864053	0.56495	0.0760142	0.161639	0.131752	0.290446	0.708916	1.24961	0.98365	0.416449	0.595531	0.710226	0.277786	0.376318	0.296537	-1.75372	3.98291e-06	0.00137875	down	yes
MSTRG.3171	FAAP20	ENST00000400919;ENST00000420515;ENST00000378546;ENST00000400918;ENST00000378543	GO:0005515(protein binding);GO:0005634(nucleus);GO:0005654(nucleoplasm);GO:0005694(chromosome);GO:0006281(DNA repair);GO:0006974(cellular response to DNA damage stimulus);GO:0016604(nuclear body);GO:0019985(translesion synthesis);GO:0030054(cell junction);GO:0031593(polyubiquitin modification-dependent protein binding);GO:0036297(interstrand cross-link repair);GO:0043130(ubiquitin binding);GO:004…	NA	NA	NA	FA core complex associated protein 20 [Source:HGNC Symbol;Acc:HGNC:26428]	protein_coding	1.592	1.91774	2.0791	4.3169	2.20903	1.71478	2.65966	3.48789	2.82142	3.75219	2.70845	4.24026	2.09095	3.68875	2.05382	2.28767	1.44269	1.59839	1.95601	1.42244	1.56355	1.37467	2.11292	1.02722	1.74512	0.803327	4.23002e-06	0.0014434	up	no
MSTRG.64659	SPARC	ENST00000231061;ENST00000522348;ENST00000539687	GO:0001503(ossification);GO:0001937(negative regulation of endothelial cell proliferation);GO:0002576(platelet degranulation);GO:0005201(extracellular matrix structural constituent);GO:0005509(calcium ion binding);GO:0005515(protein binding);GO:0005518(collagen binding);GO:0005576(extracellular region);GO:0005604(basement membrane);GO:0005615(extracellular space);GO:0005634(nucleus);GO:0005737(cy…	NA	NA	NA	secreted protein acidic and cysteine rich [Source:HGNC Symbol;Acc:HGNC:11219]	protein_coding	53.9655	54.2784	52.0881	44.3157	66.1751	24.5977	43.9616	18.8993	39.117	26.4674	20.1492	55.0304	30.7425	51.8276	17.2551	37.6169	106.649	202.293	106.556	103.812	153.254	68.7593	72.9886	18.8039	0.381992	-1.38838	4.28209e-06	0.00145564	down	yes
MSTRG.27842	PLA2G4E	ENST00000399518	GO:0004620(phospholipase activity);GO:0004623(phospholipase A2 activity);GO:0005509(calcium ion binding);GO:0005544(calcium-dependent phospholipid binding);GO:0005546(phosphatidylinositol-4,5-bisphosphate binding);GO:0005547(phosphatidylinositol-3,4,5-trisphosphate binding);GO:0005737(cytoplasm);GO:0005764(lysosome);GO:0005765(lysosomal membrane);GO:0005768(endosome);GO:0005829(cytosol);GO:000588…	00564(Glycerophospholipid metabolism);00565(Ether lipid metabolism);00590(Arachidonic acid metabolism);00591(Linoleic acid metabolism);00592(alpha-Linolenic acid metabolism);04010(MAPK signaling pathway);04014(Ras signaling pathway);04072(Phospholipase D signaling pathway);04217(Necroptosis);04270(Vascular smooth muscle contraction);04370(VEGF signaling pathway);04611(Platelet activation);04664(F…	K16342	EC:3.1.1.4	phospholipase A2 group IVE [Source:HGNC Symbol;Acc:HGNC:24791]	protein_coding	0.168648	0.378864	0.20938	0.443414	0.805509	2.57884	0.361613	0.0697961	2.24955	0.115972	0.0997728	0.0175765	0.186852	0.129479	0.334123	0.0952817	0.0638323	0.125115	0.0605429	0.0551041	0	0.0858732	0.104189	0.0663458	7.34816	2.87738	4.50209e-06	0.0015201	up	yes
MSTRG.3187	PRDM16	ENST00000509860;ENST00000270722;ENST00000514189;ENST00000511072;ENST00000378391	GO:0000122(negative regulation of transcription by RNA polymerase II);GO:0003676(nucleic acid binding);GO:0003677(DNA binding);GO:0003712(transcription coregulator activity);GO:0003713(transcription coactivator activity);GO:0005515(protein binding);GO:0005634(nucleus);GO:0005654(nucleoplasm);GO:0005737(cytoplasm);GO:0005829(cytosol);GO:0006355(regulation of transcription, DNA-templated);GO:000816…	04714(Thermogenesis);04714(Thermogenesis)	K22410	NA	PR/SET domain 16 [Source:HGNC Symbol;Acc:HGNC:14000]	protein_coding	2.06272	2.67699	2.97523	1.82248	2.26685	1.32855	3.86997	4.25094	2.80644	6.0469	2.56141	4.14097	1.73071	5.27453	3.98121	2.55465	1.28347	0.95197	2.371	2.45715	1.02459	1.47192	2.04468	1.53442	1.91604	0.93813	4.50561e-06	0.0015201	up	no
MSTRG.62909	VCAN	ENST00000513984;ENST00000342785;ENST00000513960;ENST00000343200;ENST00000265077;ENST00000502527	GO:0001501(skeletal system development);GO:0001649(osteoblast differentiation);GO:0001750(photoreceptor outer segment);GO:0005509(calcium ion binding);GO:0005515(protein binding);GO:0005539(glycosaminoglycan binding);GO:0005540(hyaluronic acid binding);GO:0005576(extracellular region);GO:0005615(extracellular space);GO:0005788(endoplasmic reticulum lumen);GO:0005796(Golgi lumen);GO:0007155(cell a…	04514(Cell adhesion molecules (CAMs));04514(Cell adhesion molecules (CAMs))	NA	NA	versican [Source:HGNC Symbol;Acc:HGNC:2464]	protein_coding	3.62033	5.3454	2.73205	1.35953	3.70218	1.66419	2.80616	1.09937	2.52305	2.63349	6.4654	12.2624	0.877975	2.93747	0.473075	2.39928	9.65836	18.7317	9.80464	6.02321	7.03672	76.0579	4.93231	2.04728	0.196964	-2.344	4.60263e-06	0.00153893	down	yes
MSTRG.46244	COL5A2	ENST00000374866;ENST00000618828;ENST00000649966	GO:0001501(skeletal system development);GO:0001503(ossification);GO:0005201(extracellular matrix structural constituent);GO:0005515(protein binding);GO:0005576(extracellular region);GO:0005581(collagen trimer);GO:0005588(collagen type V trimer);GO:0005615(extracellular space);GO:0005788(endoplasmic reticulum lumen);GO:0030020(extracellular matrix structural constituent conferring tensile strength…	04974(Protein digestion and absorption);04974(Protein digestion and absorption)	NA	NA	collagen type V alpha 2 chain [Source:HGNC Symbol;Acc:HGNC:2210]	protein_coding	4.20476	3.95032	3.46393	3.44374	4.28344	2.7635	3.65525	1.94403	3.44583	2.12607	1.8381	8.23649	2.01508	4.99429	2.46715	3.93336	10.8497	28.8858	12.5837	8.79204	14.6928	7.06462	4.49283	1.39493	0.319782	-1.64484	4.63344e-06	0.00153893	down	yes
MSTRG.9057	IGFN1	ENST00000335211	GO:0005515(protein binding);GO:0005634(nucleus);GO:0005737(cytoplasm);GO:0007156(homophilic cell adhesion via plasma membrane adhesion molecules);GO:0007416(synapse assembly);GO:0008150(biological_process);GO:0010842(retina layer formation);GO:0030018(Z disc);GO:0045202(synapse)	NA	NA	NA	immunoglobulin like and fibronectin type III domain containing 1 [Source:HGNC Symbol;Acc:HGNC:24607]	protein_coding	0.494459	0.506236	0.278584	0.598782	0.579798	0.31191	0.247356	0.111151	0.103269	0.0909409	0.299215	0.180818	0.157006	0.124183	0.228436	0.686932	0.109344	0.0461006	0.0671093	0.138994	0.223154	0.0494928	0.167822	0.0608134	2.89691	1.53451	4.78304e-06	0.00156658	up	yes
MSTRG.12320	MACROH2A2	ENST00000373255	GO:0000122(negative regulation of transcription by RNA polymerase II);GO:0000784(nuclear chromosome, telomeric region);GO:0000785(chromatin);GO:0000786(nucleosome);GO:0000790(nuclear chromatin);GO:0000976(transcription regulatory region sequence-specific DNA binding);GO:0000977(RNA polymerase II regulatory region sequence-specific DNA binding);GO:0001740(Barr body);GO:0003677(DNA binding);GO:0005…	04217(Necroptosis);05034(Alcoholism);05322(Systemic lupus erythematosus)	K11251	NA	macroH2A.2 histone [Source:HGNC Symbol;Acc:HGNC:14453]	protein_coding	1.84285	1.512	2.00654	1.23498	0.876239	1.02654	0.899958	0.889583	1.91176	1.05526	0.529253	0.797169	1.11608	0.799409	0.99374	1.38826	2.72842	1.55233	1.43589	3.08594	2.8259	7.8809	1.68118	4.10868	0.373126	-1.42226	4.92824e-06	0.00160244	down	yes
MSTRG.34285	PIGS	ENST00000395346;ENST00000308360	GO:0005515(protein binding);GO:0005783(endoplasmic reticulum);GO:0005789(endoplasmic reticulum membrane);GO:0006506(GPI anchor biosynthetic process);GO:0006508(proteolysis);GO:0016020(membrane);GO:0016021(integral component of membrane);GO:0016255(attachment of GPI anchor to protein);GO:0042765(GPI-anchor transamidase complex);GO:0042765(GPI-anchor transamidase complex)	00563(Glycosylphosphatidylinositol (GPI)-anchor biosynthesis);00563(Glycosylphosphatidylinositol (GPI)-anchor biosynthesis)	K05291	NA	phosphatidylinositol glycan anchor biosynthesis class S [Source:HGNC Symbol;Acc:HGNC:14937]	protein_coding	5.12706	5.49861	5.48776	3.03451	4.32238	2.88026	3.46632	3.00339	5.1425	4.26809	3.03713	3.95224	2.6193	3.96995	3.87885	3.99384	7.26981	5.98365	8.96438	5.77406	4.93716	7.17956	4.83025	8.76348	0.592918	-0.754095	5.84804e-06	0.00186769	down	no
MSTRG.64599	SLC26A2	ENST00000286298;ENST00000433184	GO:0001503(ossification);GO:0005886(plasma membrane);GO:0005887(integral component of plasma membrane);GO:0006811(ion transport);GO:0008271(secondary active sulfate transmembrane transporter activity);GO:0008272(sulfate transport);GO:0015106(bicarbonate transmembrane transporter activity);GO:0015108(chloride transmembrane transporter activity);GO:0015116(sulfate transmembrane transporter activity…	NA	K14701	NA	solute carrier family 26 member 2 [Source:HGNC Symbol;Acc:HGNC:10994]	protein_coding	2.55246	3.08196	2.45054	2.11332	3.07399	1.63999	1.10596	1.10537	1.44678	1.74261	1.62056	2.30404	2.01255	1.89861	0.966587	1.77348	5.0095	3.85703	4.71494	2.69404	3.00799	3.79832	3.34015	3.96921	0.508187	-0.976569	6.2606e-06	0.00195765	down	no
MSTRG.42598	QPCT	ENST00000338415;ENST00000404976;ENST00000650442;ENST00000444022	GO:0005515(protein binding);GO:0005576(extracellular region);GO:0006464(cellular protein modification process);GO:0008270(zinc ion binding);GO:0016603(glutaminyl-peptide cyclotransferase activity);GO:0016740(transferase activity);GO:0016746(transferase activity, transferring acyl groups);GO:0017186(peptidyl-pyroglutamic acid biosynthetic process, using glutaminyl-peptide cyclotransferase);GO:0035…	NA	K00683	EC:2.3.2.5	glutaminyl-peptide cyclotransferase [Source:HGNC Symbol;Acc:HGNC:9753]	protein_coding	0.854867	1.1091	0.597122	0.279935	0.474746	0.27114	0.539333	0.277378	0.384934	0.57698	0.634514	1.8458	0.134835	0.297163	0.0928235	0.57528	6.23314	0.708817	1.28864	1.07934	1.59862	5.5223	0.647492	1.19979	0.244717	-2.03081	6.65333e-06	0.00206606	down	yes
MSTRG.34350	CPD	ENST00000225719;ENST00000543464	GO:0004180(carboxypeptidase activity);GO:0004181(metallocarboxypeptidase activity);GO:0004185(serine-type carboxypeptidase activity);GO:0005615(extracellular space);GO:0005886(plasma membrane);GO:0006508(proteolysis);GO:0006518(peptide metabolic process);GO:0008233(peptidase activity);GO:0008237(metallopeptidase activity);GO:0008270(zinc ion binding);GO:0016020(membrane);GO:0016021(integral compo…	NA	NA	NA	carboxypeptidase D [Source:HGNC Symbol;Acc:HGNC:2301]	protein_coding	7.25838	5.38285	8.17574	3.17054	6.14569	4.86308	4.08898	2.49686	5.36711	3.84726	3.9868	6.43529	3.69187	3.2802	3.8934	4.17031	23.3044	11.6651	15.2906	6.32684	5.45172	8.66499	4.14304	18.4943	0.408472	-1.29169	6.79593e-06	0.00209583	down	yes
MSTRG.59397	SPP1	ENST00000614857;ENST00000508233;ENST00000237623;ENST00000395080;ENST00000360804	GO:0001503(ossification);GO:0001649(osteoblast differentiation);GO:0005125(cytokine activity);GO:0005178(integrin binding);GO:0005515(protein binding);GO:0005576(extracellular region);GO:0005615(extracellular space);GO:0005788(endoplasmic reticulum lumen);GO:0005794(Golgi apparatus);GO:0006710(androgen catabolic process);GO:0006954(inflammatory response);GO:0007155(cell adhesion);GO:0007165(signa…	04151(PI3K-Akt signaling pathway);04371(Apelin signaling pathway);04510(Focal adhesion);04512(ECM-receptor interaction);04620(Toll-like receptor signaling pathway);05165(Human papillomavirus infection);05165(Human papillomavirus infection)	K06250	NA	secreted phosphoprotein 1 [Source:HGNC Symbol;Acc:HGNC:11255]	protein_coding	10.4431	11.259	1.75024	0.994391	0.806489	3.78763	14.2517	0.243237	3.12159	7.35978	4.46869	27.5672	0.770324	7.97816	0.436845	4.78007	133.738	181.08	105.825	8.65085	11.7718	26.3985	2.58829	4.39805	0.105404	-3.24599	7.24157e-06	0.00219841	down	yes
MSTRG.41453	BRSK1	ENST00000309383;ENST00000591774;ENST00000585418;ENST00000326848	GO:0000086(G2/M transition of mitotic cell cycle);GO:0000166(nucleotide binding);GO:0000287(magnesium ion binding);GO:0004672(protein kinase activity);GO:0004674(protein serine/threonine kinase activity);GO:0005524(ATP binding);GO:0005634(nucleus);GO:0005654(nucleoplasm);GO:0005737(cytoplasm);GO:0005813(centrosome);GO:0005815(microtubule organizing center);GO:0005856(cytoskeleton);GO:0006468(prot…	NA	K08796	EC:2.7.11.1	BR serine/threonine kinase 1 [Source:HGNC Symbol;Acc:HGNC:18994]	protein_coding	0.595903	0.214276	0.14999	0.275215	0.116238	0.564028	0.416963	0.24104	0.344521	0.396845	0.0478386	0.449254	0.0752492	0.653859	0.288491	0.258217	1.3463	3.13296	0.952147	0.588952	0.92029	2.74252	0.512103	0.280772	0.242837	-2.04194	7.25103e-06	0.00219841	down	yes
MSTRG.60090	BBS7	ENST00000264499;ENST00000506636	GO:0001103(RNA polymerase II repressing transcription factor binding);GO:0001654(eye development);GO:0001750(photoreceptor outer segment);GO:0001947(heart looping);GO:0005515(protein binding);GO:0005634(nucleus);GO:0005737(cytoplasm);GO:0005813(centrosome);GO:0005815(microtubule organizing center);GO:0005829(cytosol);GO:0005856(cytoskeleton);GO:0005886(plasma membrane);GO:0005929(cilium);GO:00059…	NA	K16749	NA	Bardet-Biedl syndrome 7 [Source:HGNC Symbol;Acc:HGNC:18758]	protein_coding	0.971572	0.810836	1.00735	0.548543	0.936594	0.653315	0.742792	0.505793	0.717161	0.636245	0.654532	0.618755	0.635276	0.79063	0.59751	0.393286	1.70872	1.1584	0.972008	1.26635	1.2353	1.19299	1.04796	0.92805	0.589929	-0.761386	7.31694e-06	0.00221092	down	no
MSTRG.73549	TMEM176A	ENST00000484928;ENST00000475536;ENST00000468689;ENST00000004103	GO:0005515(protein binding);GO:0016020(membrane);GO:0016021(integral component of membrane);GO:2001199(negative regulation of dendritic cell differentiation);GO:2001199(negative regulation of dendritic cell differentiation)	NA	NA	NA	transmembrane protein 176A [Source:HGNC Symbol;Acc:HGNC:24930]	protein_coding	5.36452	4.57542	3.89168	1.46377	2.99933	1.58105	2.85525	1.27168	2.93932	2.84392	1.00467	1.94045	2.24076	6.55079	1.71466	3.89812	16.3639	4.71349	3.77862	3.96652	7.09147	10.4521	4.32019	11.5381	0.378753	-1.40067	9.27203e-06	0.00268419	down	yes
MSTRG.80093	PNPLA7	ENST00000277531;ENST00000406427	GO:0004622(lysophospholipase activity);GO:0005783(endoplasmic reticulum);GO:0005789(endoplasmic reticulum membrane);GO:0005811(lipid droplet);GO:0006629(lipid metabolic process);GO:0016020(membrane);GO:0016021(integral component of membrane);GO:0016042(lipid catabolic process);GO:0016787(hydrolase activity);GO:0034638(phosphatidylcholine catabolic process);GO:0102545(phosphatidyl phospholipase B …	00564(Glycerophospholipid metabolism);00564(Glycerophospholipid metabolism)	K14676	EC:3.1.1.5	patatin like phospholipase domain containing 7 [Source:HGNC Symbol;Acc:HGNC:24768]	protein_coding	3.83597	1.58862	1.74302	2.96104	2.00335	1.25296	3.86914	4.05894	2.03492	3.09718	1.65388	1.0415	1.85719	2.61171	2.53702	3.45774	0.413414	0.830389	2.01906	1.47799	1.64838	0.780653	1.70675	0.790456	2.0484	1.0345	9.5723e-06	0.00276221	up	yes
MSTRG.17067	PDGFD	ENST00000393158;ENST00000302251	GO:0000139(Golgi membrane);GO:0005161(platelet-derived growth factor receptor binding);GO:0005576(extracellular region);GO:0005615(extracellular space);GO:0005788(endoplasmic reticulum lumen);GO:0007275(multicellular organism development);GO:0008083(growth factor activity);GO:0008284(positive regulation of cell population proliferation);GO:0014068(positive regulation of phosphatidylinositol 3-kin…	01521(EGFR tyrosine kinase inhibitor resistance);04010(MAPK signaling pathway);04014(Ras signaling pathway);04015(Rap1 signaling pathway);04072(Phospholipase D signaling pathway);04151(PI3K-Akt signaling pathway);04510(Focal adhesion);04540(Gap junction);04810(Regulation of actin cytoskeleton);05215(Prostate cancer);05218(Melanoma);05231(Choline metabolism in cancer);05231(Choline metabolism in c…	K05450	NA	platelet derived growth factor D [Source:HGNC Symbol;Acc:HGNC:30620]	protein_coding	0.70854	0.675573	0.675636	0.462978	1.45596	0.41003	0.618934	0.493645	1.05274	0.496819	0.431912	1.0345	0.160771	0.678026	0.580229	0.164033	1.37229	1.60007	3.31432	1.2983	2.12947	0.901225	0.56204	3.38604	0.346762	-1.52798	9.6413e-06	0.0027732	down	yes
MSTRG.1030	ALAS2	ENST00000335854;ENST00000650242;ENST00000396198;ENST00000644983	GO:0001666(response to hypoxia);GO:0003824(catalytic activity);GO:0003870(5-aminolevulinate synthase activity);GO:0005515(protein binding);GO:0005739(mitochondrion);GO:0005743(mitochondrial inner membrane);GO:0005759(mitochondrial matrix);GO:0006778(porphyrin-containing compound metabolic process);GO:0006782(protoporphyrinogen IX biosynthetic process);GO:0006783(heme biosynthetic process);GO:0006…	00260(Glycine, serine and threonine metabolism);00860(Porphyrin and chlorophyll metabolism);00860(Porphyrin and chlorophyll metabolism)	NA	NA	5'-aminolevulinate synthase 2 [Source:HGNC Symbol;Acc:HGNC:397]	protein_coding	0.25415	0.179269	0.211793	0.250543	0.379787	0	0.0740527	0.337459	0.0481238	0.0393276	0.176874	0.131807	0.0587554	0.153195	0.0112438	0.242336	0.917661	0.307103	7.43072	0.396423	0.299133	0.333337	0.314956	0.142205	0.125657	-2.99243	9.87558e-06	0.00283152	down	yes
MSTRG.39059	PRKCSH	ENST00000589838;ENST00000591946;ENST00000592741;ENST00000591462;ENST00000587327;ENST00000593101;ENST00000588269	GO:0001701(in utero embryonic development);GO:0001889(liver development);GO:0003723(RNA binding);GO:0005080(protein kinase C binding);GO:0005509(calcium ion binding);GO:0005515(protein binding);GO:0005783(endoplasmic reticulum);GO:0005788(endoplasmic reticulum lumen);GO:0006457(protein folding);GO:0006491(N-glycan processing);GO:0006807(nitrogen compound metabolic process);GO:0010977(negative reg…	04141(Protein processing in endoplasmic reticulum);04141(Protein processing in endoplasmic reticulum)	NA	NA	protein kinase C substrate 80K-H [Source:HGNC Symbol;Acc:HGNC:9411]	protein_coding	8.81099	8.45148	10.2641	5.38906	9.19642	6.42282	9.69466	8.01866	8.71017	7.67788	7.38509	7.56811	5.1893	7.95358	5.77915	6.54063	16.7618	13.2053	12.1053	8.15637	10.7614	12.8449	13.5191	11.3382	0.623412	-0.681741	1.01839e-05	0.00289665	down	no
MSTRG.1350	IGBP1	ENST00000342206;ENST00000356413	GO:0000122(negative regulation of transcription by RNA polymerase II);GO:0005515(protein binding);GO:0005737(cytoplasm);GO:0005829(cytosol);GO:0007165(signal transduction);GO:0009966(regulation of signal transduction);GO:0019888(protein phosphatase regulator activity);GO:0032873(negative regulation of stress-activated MAPK cascade);GO:0034612(response to tumor necrosis factor);GO:0035303(regulati…	04136(Autophagy - other);04140(Autophagy - animal);04140(Autophagy - animal)	NA	NA	immunoglobulin binding protein 1 [Source:HGNC Symbol;Acc:HGNC:5461]	protein_coding	5.9292	4.37396	5.06741	2.60237	4.76161	2.36344	3.82406	2.87626	4.47732	3.35352	4.28075	5.29182	2.94022	4.21178	2.66808	2.72757	6.74959	8.52552	5.41536	6.17284	5.8728	5.81068	5.25593	6.42237	0.614726	-0.701984	1.02319e-05	0.00289665	down	no
MSTRG.14184	CRACR2B	ENST00000525077;ENST00000527089;ENST00000533803;ENST00000528315;ENST00000450448;ENST00000530183	GO:0002115(store-operated calcium entry);GO:0005509(calcium ion binding);GO:0005515(protein binding);GO:0005737(cytoplasm);GO:0034613(cellular protein localization);GO:2001256(regulation of store-operated calcium entry);GO:2001256(regulation of store-operated calcium entry)	NA	K17199	NA	calcium release activated channel regulator 2B [Source:HGNC Symbol;Acc:HGNC:28703]	protein_coding	3.80681	6.86232	4.67392	7.30366	7.08895	7.93963	10.3339	18.5514	7.52512	8.90675	20.8875	12.4441	7.47575	16.4229	11.4957	12.7443	6.01535	2.83139	9.13558	4.99825	2.59698	5.01312	3.3877	1.92548	2.29032	1.19555	1.03095e-05	0.00290033	up	yes
MSTRG.9142	CHI3L1	ENST00000255409;ENST00000404436	GO:0005201(extracellular matrix structural constituent);GO:0005515(protein binding);GO:0005576(extracellular region);GO:0005615(extracellular space);GO:0005737(cytoplasm);GO:0005783(endoplasmic reticulum);GO:0005975(carbohydrate metabolic process);GO:0006032(chitin catabolic process);GO:0006915(apoptotic process);GO:0006954(inflammatory response);GO:0007250(activation of NF-kappaB-inducing kinase…	NA	NA	NA	chitinase 3 like 1 [Source:HGNC Symbol;Acc:HGNC:1932]	protein_coding	3.41136	6.61869	1.19135	1.96804	3.14448	3.09065	1.63983	4.24378	1.65965	1.51357	0.716511	0.742975	1.10222	0.397584	1.20689	2.32284	29.9114	4.19711	6.49002	1.35713	2.40132	2.75942	0.891417	61.7501	0.159307	-2.65012	1.09415e-05	0.0030213	down	yes
MSTRG.9489	PROX1	ENST00000607425;ENST00000366958;ENST00000261454;ENST00000435016;ENST00000471129;ENST00000498508	GO:0000122(negative regulation of transcription by RNA polymerase II);GO:0000790(nuclear chromatin);GO:0000976(transcription regulatory region sequence-specific DNA binding);GO:0000978(RNA polymerase II cis-regulatory region sequence-specific DNA binding);GO:0000981(DNA-binding transcription factor activity, RNA polymerase II-specific);GO:0001227(DNA-binding transcription repressor activity, RNA …	NA	K20211	NA	prospero homeobox 1 [Source:HGNC Symbol;Acc:HGNC:9459]	protein_coding	0.482546	0.340099	0.940093	0.0920695	0.479551	0.211183	0.228516	0.135772	0.417066	0.191506	0.095419	0.0557058	0.16384	0.381177	0.192626	0.134133	1.76828	0.61285	0.402968	0.521804	1.56903	0.734316	0.386719	1.64034	0.297349	-1.74977	1.17596e-05	0.00320538	down	yes
MSTRG.8449	CENPL	ENST00000367710;ENST00000356198;ENST00000345664	GO:0000775(chromosome, centromeric region);GO:0005515(protein binding);GO:0005634(nucleus);GO:0005654(nucleoplasm);GO:0005694(chromosome);GO:0005829(cytosol);GO:0034080(CENP-A containing nucleosome assembly);GO:0034080(CENP-A containing nucleosome assembly)	NA	K11504	NA	centromere protein L [Source:HGNC Symbol;Acc:HGNC:17879]	protein_coding	0.583817	0.623336	0.519721	0.274469	0.530811	0.267612	0.491351	0.208373	0.315239	0.30597	0.360055	0.364487	0.190027	0.493587	0.207816	0.27669	0.781505	0.832009	0.669132	0.677662	0.54741	1.23781	0.427151	0.7552	0.50721	-0.979345	1.19766e-05	0.00321855	down	no
MSTRG.76170	CTHRC1	ENST00000520337;ENST00000330295;ENST00000415886;ENST00000520880	GO:0005109(frizzled binding);GO:0005201(extracellular matrix structural constituent);GO:0005576(extracellular region);GO:0005581(collagen trimer);GO:0005615(extracellular space);GO:0005737(cytoplasm);GO:0016477(cell migration);GO:0017147(Wnt-protein binding);GO:0031012(extracellular matrix);GO:0032092(positive regulation of protein binding);GO:0033690(positive regulation of osteoblast proliferati…	NA	NA	NA	collagen triple helix repeat containing 1 [Source:HGNC Symbol;Acc:HGNC:18831]	protein_coding	1.87312	2.15944	1.97965	1.24582	2.39067	1.10144	3.48693	0.914587	1.08581	1.00136	1.31787	5.56551	0.569156	2.89553	1.63761	0.960605	7.29094	14.4251	13.2466	3.22628	7.27007	5.96738	1.25424	1.04938	0.280896	-1.83189	1.26234e-05	0.00333194	down	yes
MSTRG.22140	NCOR2	ENST00000405201;ENST00000542927;ENST00000356219;ENST00000429285;ENST00000448008;ENST00000404121;ENST00000458234;ENST00000448614;ENST00000418829;ENST00000413172;ENST00000404621;ENST00000453428;ENST00000440187	GO:0000118(histone deacetylase complex);GO:0000122(negative regulation of transcription by RNA polymerase II);GO:0000785(chromatin);GO:0000790(nuclear chromatin);GO:0000977(RNA polymerase II regulatory region sequence-specific DNA binding);GO:0003677(DNA binding);GO:0003682(chromatin binding);GO:0003714(transcription corepressor activity);GO:0005112(Notch binding);GO:0005515(protein binding);GO:0…	04330(Notch signaling pathway);05169(Epstein-Barr virus infection);05169(Epstein-Barr virus infection)	K06065	NA	nuclear receptor corepressor 2 [Source:HGNC Symbol;Acc:HGNC:7673]	protein_coding	3.72476	3.56588	3.86002	3.17959	3.78494	3.43432	3.38512	3.36276	3.08337	3.44315	2.9127	4.67338	3.31401	4.34607	4.0637	4.13652	1.97044	2.3027	2.77402	3.0264	3.19899	1.8651	3.48436	3.25116	1.332	0.413598	1.3191e-05	0.00344129	up	no
MSTRG.64552	SPINK13	ENST00000511106;ENST00000398450;ENST00000512953	GO:0004867(serine-type endopeptidase inhibitor activity);GO:0005515(protein binding);GO:0005576(extracellular region);GO:0010466(negative regulation of peptidase activity);GO:0010951(negative regulation of endopeptidase activity);GO:0030414(peptidase inhibitor activity);GO:1902225(negative regulation of acrosome reaction);GO:1902225(negative regulation of acrosome reaction)	NA	K19924	NA	serine peptidase inhibitor Kazal type 13 [Source:HGNC Symbol;Acc:HGNC:27200]	protein_coding	0.0955587	0.135049	0.104875	0.11122	0.0889639	0.0590658	0.240413	0.165725	0.098613	0.0950564	0.0382484	0.0187496	0.0891728	0.0347226	0	0.198547	5.25899	0.130159	0.103497	0.0533999	0.0776503	0.0944146	0.290147	0.480157	0.121292	-3.04345	1.3427e-05	0.0034927	down	yes
MSTRG.32027	CDH11	ENST00000619158;ENST00000562712;ENST00000394156;ENST00000564317;ENST00000567934;ENST00000562325;ENST00000566827;ENST00000562882;ENST00000562998;ENST00000268603	GO:0000902(cell morphogenesis);GO:0001501(skeletal system development);GO:0001503(ossification);GO:0005509(calcium ion binding);GO:0005737(cytoplasm);GO:0005886(plasma membrane);GO:0005912(adherens junction);GO:0007043(cell-cell junction assembly);GO:0007155(cell adhesion);GO:0007156(homophilic cell adhesion via plasma membrane adhesion molecules);GO:0016020(membrane);GO:0016021(integral componen…	NA	NA	NA	cadherin 11 [Source:HGNC Symbol;Acc:HGNC:1750]	protein_coding	1.38358	1.7396	1.87278	0.665253	2.12736	0.571605	1.05844	0.631991	1.95566	1.16207	0.369838	1.30157	0.567954	2.30786	0.582128	1.09952	7.42304	5.3309	3.16762	3.05417	3.7765	2.46846	1.96083	0.448072	0.351022	-1.51037	1.36207e-05	0.00353283	down	yes
MSTRG.35398	HOXB9	ENST00000311177	GO:0000790(nuclear chromatin);GO:0000977(RNA polymerase II regulatory region sequence-specific DNA binding);GO:0000978(RNA polymerase II cis-regulatory region sequence-specific DNA binding);GO:0000981(DNA-binding transcription factor activity, RNA polymerase II-specific);GO:0003677(DNA binding);GO:0003700(DNA-binding transcription factor activity);GO:0005515(protein binding);GO:0005634(nucleus);G…	NA	K09294	NA	homeobox B9 [Source:HGNC Symbol;Acc:HGNC:5120]	protein_coding	0.0119149	0.0161942	0	0	0.00663475	0	0.0329559	0	0.0151492	0.00647537	0.0230131	0	0.0432152	0.00511224	0	0	0.0317949	0	0.203223	0.00966279	0.0372687	5.92505	0.0257632	0	0.0128887	-6.27775	1.47688e-05	0.00377607	down	yes
MSTRG.74983	SNAI2	ENST00000020945;ENST00000396822	GO:0000122(negative regulation of transcription by RNA polymerase II);GO:0000790(nuclear chromatin);GO:0000977(RNA polymerase II regulatory region sequence-specific DNA binding);GO:0000981(DNA-binding transcription factor activity, RNA polymerase II-specific);GO:0001227(DNA-binding transcription repressor activity, RNA polymerase II-specific);GO:0001649(osteoblast differentiation);GO:0001837(epit…	04390(Hippo signaling pathway);04520(Adherens junction);04520(Adherens junction)	K05706	NA	snail family transcriptional repressor 2 [Source:HGNC Symbol;Acc:HGNC:11094]	protein_coding	0.886962	0.852795	0.826726	0.378345	0.891133	0.222782	0.354675	0.226991	0.573725	0.65457	0.139674	0.427242	0.376769	0.409372	0.319359	0.648392	1.25839	2.45906	1.49641	1.69152	2.6276	0.679456	0.556073	0.419037	0.366011	-1.45004	1.48553e-05	0.00378462	down	yes
MSTRG.42311	FNDC4	ENST00000264703	GO:0005515(protein binding);GO:0005576(extracellular region);GO:0005615(extracellular space);GO:0005783(endoplasmic reticulum);GO:0005886(plasma membrane);GO:0016020(membrane);GO:0016021(integral component of membrane);GO:0050728(negative regulation of inflammatory response);GO:0071559(response to transforming growth factor beta)	NA	NA	NA	fibronectin type III domain containing 4 [Source:HGNC Symbol;Acc:HGNC:20239]	protein_coding	0.53679	0.610343	0.62458	0.354256	0.84312	0.809381	1.13335	0.418408	0.71739	0.570791	0.776633	1.24127	0.436425	1.3917	0.589612	0.443259	8.59285	1.94984	1.424	1.99478	1.93969	2.16033	0.882461	0.287403	0.298921	-1.74216	1.56653e-05	0.00394903	down	yes
MSTRG.59155	CCNG2	ENST00000316355;ENST00000509972;ENST00000395640;ENST00000512918	GO:0000079(regulation of cyclin-dependent protein serine/threonine kinase activity);GO:0000307(cyclin-dependent protein kinase holoenzyme complex);GO:0005634(nucleus);GO:0005737(cytoplasm);GO:0007049(cell cycle);GO:0016538(cyclin-dependent protein serine/threonine kinase regulator activity);GO:0044772(mitotic cell cycle phase transition);GO:0051301(cell division);GO:0051726(regulation of cell cyc…	04068(FoxO signaling pathway);04115(p53 signaling pathway);04115(p53 signaling pathway)	NA	NA	cyclin G2 [Source:HGNC Symbol;Acc:HGNC:1593]	protein_coding	3.40563	3.08338	3.41173	1.66603	2.93548	1.49156	2.26741	1.75285	2.06516	2.80434	2.93889	2.13843	2.17104	2.63716	1.58436	2.73496	6.63439	3.27101	3.71338	3.95075	3.6916	5.23606	2.56951	4.13191	0.588705	-0.764382	1.72719e-05	0.00430564	down	no
MSTRG.9138	ADORA1	ENST00000367236;ENST00000367235;ENST00000640524;ENST00000337894;ENST00000309502	GO:0000186(activation of MAPKK activity);GO:0001609(G protein-coupled adenosine receptor activity);GO:0001659(temperature homeostasis);GO:0001664(G protein-coupled receptor binding);GO:0001666(response to hypoxia);GO:0001883(purine nucleoside binding);GO:0001973(G protein-coupled adenosine receptor signaling pathway);GO:0002087(regulation of respiratory gaseous exchange by nervous system process)…	04022(cGMP-PKG signaling pathway);04024(cAMP signaling pathway);04071(Sphingolipid signaling pathway);04080(Neuroactive ligand-receptor interaction);04923(Regulation of lipolysis in adipocytes);04924(Renin secretion);05032(Morphine addiction);05032(Morphine addiction)	NA	NA	adenosine A1 receptor [Source:HGNC Symbol;Acc:HGNC:262]	protein_coding	0.366967	0.418398	0.348789	0.120679	0.959452	0.392564	0.248346	0.346846	0.145472	0.36506	0.115353	0.872518	0.338369	0.205994	0.0790685	0.730551	0.951707	1.89786	4.70666	0.56631	0.373022	0.660808	0.231925	3.4374	0.236027	-2.08297	1.91052e-05	0.00467183	down	yes
MSTRG.43503	SLC1A4	ENST00000234256;ENST00000531327	GO:0005254(chloride channel activity);GO:0005813(centrosome);GO:0005882(intermediate filament);GO:0005886(plasma membrane);GO:0005887(integral component of plasma membrane);GO:0006865(amino acid transport);GO:0006868(glutamine transport);GO:0009986(cell surface);GO:0015171(amino acid transmembrane transporter activity);GO:0015175(neutral amino acid transmembrane transporter activity);GO:0015180(L…	NA	NA	NA	solute carrier family 1 member 4 [Source:HGNC Symbol;Acc:HGNC:10942]	protein_coding	3.17287	1.6962	3.11238	1.87631	2.26443	2.33329	3.3839	1.662	3.15533	2.99994	1.09332	2.40491	1.23323	1.7859	1.64812	2.7494	4.48015	5.25889	4.68505	3.14197	4.7671	5.41574	2.4606	4.8598	0.521418	-0.939488	1.96842e-05	0.00480032	down	no
MSTRG.17619	THY1	ENST00000284240;ENST00000528522;ENST00000524659;ENST00000580275	GO:0001525(angiogenesis);GO:0001952(regulation of cell-matrix adhesion);GO:0002693(positive regulation of cellular extravasation);GO:0005096(GTPase activator activity);GO:0005178(integrin binding);GO:0005515(protein binding);GO:0005576(extracellular region);GO:0005783(endoplasmic reticulum);GO:0005829(cytosol);GO:0005886(plasma membrane);GO:0005887(integral component of plasma membrane);GO:000592…	04670(Leukocyte transendothelial migration);04670(Leukocyte transendothelial migration)	K06514	NA	Thy-1 cell surface antigen [Source:HGNC Symbol;Acc:HGNC:11801]	protein_coding	4.27556	2.92866	1.61018	0.497117	1.1622	0.833679	1.38201	0.804176	2.19699	1.51503	1.19291	3.03195	0.905512	1.60548	1.12525	1.8885	5.8992	9.06561	3.95856	3.8418	9.17206	2.79157	2.23719	0.997354	0.355016	-1.49404	2.03789e-05	0.00494286	down	yes
MSTRG.59121	STBD1;FAM47E;FAM47E-STBD1	ENST00000237642;ENST00000510328;ENST00000606246;ENST00000502320;ENST00000510197;ENST00000514140;ENST00000515604;ENST00000424749	GO:0005515(protein binding);GO:0005783(endoplasmic reticulum);GO:0005789(endoplasmic reticulum membrane);GO:0005829(cytosol);GO:0005886(plasma membrane);GO:0005887(integral component of plasma membrane);GO:0005975(carbohydrate metabolic process);GO:0005977(glycogen metabolic process);GO:0005980(glycogen catabolic process);GO:0006914(autophagy);GO:0016020(membrane);GO:0016021(integral component of…	NA	NA	NA	starch binding domain 1 [Source:HGNC Symbol;Acc:HGNC:24854];family with sequence similarity 47 member E [Source:HGNC Symbol;Acc:HGNC:34343];FAM47E-STBD1 readthrough [Source:HGNC Symbol;Acc:HGNC:44667]	protein_coding	0.92105	0.419245	1.01835	0.555033	0.727958	0.477358	0.898469	0.285664	0.549036	0.520754	0.537995	0.61799	0.491376	0.718688	0.283639	0.393857	2.01461	0.947504	1.71005	0.780188	0.665049	1.31323	0.806044	1.59245	0.479008	-1.06188	2.08199e-05	0.00500923	down	yes
MSTRG.67493	COL12A1	ENST00000615798;ENST00000322507;ENST00000483888;ENST00000345356;ENST00000493109;ENST00000425443	GO:0005515(protein binding);GO:0005576(extracellular region);GO:0005581(collagen trimer);GO:0005595(collagen type XII trimer);GO:0005615(extracellular space);GO:0005788(endoplasmic reticulum lumen);GO:0007155(cell adhesion);GO:0030020(extracellular matrix structural constituent conferring tensile strength);GO:0030199(collagen fibril organization);GO:0035987(endodermal cell differentiation);GO:006…	04974(Protein digestion and absorption);04974(Protein digestion and absorption)	NA	NA	collagen type XII alpha 1 chain [Source:HGNC Symbol;Acc:HGNC:2188]	protein_coding	2.32596	2.41961	3.17603	3.59413	4.20297	2.21846	2.32113	1.32039	1.0216	0.822692	1.1472	4.69006	2.3664	2.99912	0.960348	1.89895	12.7	18.7577	4.80975	5.07155	9.79564	6.31018	3.86565	0.873954	0.301402	-1.73024	2.18198e-05	0.00518037	down	yes
MSTRG.15146	KIAA1549L	ENST00000265654;ENST00000658780;ENST00000526400	GO:0016020(membrane);GO:0016021(integral component of membrane);GO:0016021(integral component of membrane)	NA	NA	NA	KIAA1549 like [Source:HGNC Symbol;Acc:HGNC:24836]	protein_coding	0.0147911	0.0409208	0.0613826	0.0397795	0.00184266	0.0510424	0.132637	0.0243599	0.00989266	0.0389756	0.0142842	0.0605029	0.0669747	0.124752	0.0539123	0.0671022	0.136296	0.229959	0.0848685	0.072656	0.140424	1.38957	0.0821903	0.0749452	0.181634	-2.4609	2.30645e-05	0.00541852	down	yes
MSTRG.61723	ADAMTS12	ENST00000504830;ENST00000515401	GO:0004222(metalloendopeptidase activity);GO:0005515(protein binding);GO:0005576(extracellular region);GO:0006508(proteolysis);GO:0007160(cell-matrix adhesion);GO:0008233(peptidase activity);GO:0008237(metallopeptidase activity);GO:0016477(cell migration);GO:0016787(hydrolase activity);GO:0030167(proteoglycan catabolic process);GO:0030198(extracellular matrix organization);GO:0031012(extracellula…	NA	K08626	EC:3.4.24.-	ADAM metallopeptidase with thrombospondin type 1 motif 12 [Source:HGNC Symbol;Acc:HGNC:14605]	protein_coding	1.38362	1.5772	1.31703	1.38118	2.36464	0.710469	1.15933	0.686345	1.21746	0.831347	0.367687	1.71204	0.77967	1.17229	0.494577	0.755065	4.25821	5.18771	2.78876	1.97475	3.12261	3.64243	1.83595	0.495577	0.384235	-1.37994	2.57927e-05	0.00596258	down	yes
MSTRG.66184	ZNF184	ENST00000211936;ENST00000377419	GO:0003676(nucleic acid binding);GO:0003677(DNA binding);GO:0005634(nucleus);GO:0006355(regulation of transcription, DNA-templated);GO:0008270(zinc ion binding);GO:0046872(metal ion binding);GO:0046872(metal ion binding)	05168(Herpes simplex virus 1 infection);05168(Herpes simplex virus 1 infection)	K09228	NA	zinc finger protein 184 [Source:HGNC Symbol;Acc:HGNC:12975]	protein_coding	0.855808	1.92608	1.19795	0.906069	1.37325	0.77948	1.59572	0.96611	0.90488	1.474	1.44403	1.30846	0.914236	1.37769	0.969693	0.949022	1.77009	1.74339	2.32062	1.99659	1.74686	1.67508	2.05119	1.98242	0.619592	-0.69061	2.63536e-05	0.00606423	down	no
MSTRG.39520	KXD1	ENST00000222307;ENST00000595870;ENST00000596785;ENST00000600099;ENST00000597438;ENST00000602094;ENST00000539106;ENST00000599000;ENST00000596244;ENST00000540691;ENST00000600372;ENST00000598830;ENST00000595073;ENST00000601630	GO:0005515(protein binding);GO:0005764(lysosome);GO:0005765(lysosomal membrane);GO:0016020(membrane);GO:0016192(vesicle-mediated transport);GO:0031083(BLOC-1 complex);GO:0032418(lysosome localization);GO:0099078(BORC complex);GO:0099078(BORC complex)	NA	K20818	NA	KxDL motif containing 1 [Source:HGNC Symbol;Acc:HGNC:28420]	protein_coding	1.69861	2.89851	2.36068	1.62236	2.33454	1.43655	1.92286	1.21715	1.54142	2.02205	1.16696	1.19972	1.34108	2.47705	1.06647	1.74347	3.01772	2.17039	3.85823	2.40568	2.46185	3.42667	2.84916	4.97602	0.557295	-0.843487	2.69972e-05	0.00619643	down	no
MSTRG.79255	ZFP37	ENST00000374227;ENST00000555206;ENST00000553380	GO:0003676(nucleic acid binding);GO:0003677(DNA binding);GO:0003700(DNA-binding transcription factor activity);GO:0005634(nucleus);GO:0006355(regulation of transcription, DNA-templated);GO:0008270(zinc ion binding);GO:0043565(sequence-specific DNA binding);GO:0046872(metal ion binding);GO:0046872(metal ion binding)	05168(Herpes simplex virus 1 infection);05168(Herpes simplex virus 1 infection)	K09228	NA	ZFP37 zinc finger protein [Source:HGNC Symbol;Acc:HGNC:12863]	protein_coding	0.208149	0.153864	0.358595	0.203439	0.234998	0.0971877	0.169052	0.135092	0.181877	0.19031	0.0670495	0.095806	0.187579	0.267799	0.193743	0.113532	0.274272	0.283146	0.329517	0.304968	0.381864	0.504927	0.293761	1.35307	0.383579	-1.3824	2.79674e-05	0.00638647	down	yes
MSTRG.16316	DNAJB13	ENST00000537753;ENST00000542350;ENST00000543947;ENST00000339764	GO:0005515(protein binding);GO:0005737(cytoplasm);GO:0005829(cytosol);GO:0005929(cilium);GO:0005930(axoneme);GO:0006457(protein folding);GO:0030030(cell projection organization);GO:0031514(motile cilium);GO:0036126(sperm flagellum);GO:0042995(cell projection);GO:0051082(unfolded protein binding);GO:0051085(chaperone cofactor-dependent protein refolding);GO:0051087(chaperone binding);GO:0097224(sp…	NA	K09519	NA	DnaJ heat shock protein family (Hsp40) member B13 [Source:HGNC Symbol;Acc:HGNC:30718]	protein_coding	0.124246	0.0998618	0.169379	0.0601011	0.0811945	0.100347	1.00244	0.113059	0.287963	0.30084	0.145246	0.399427	0.133086	0.110042	0.177864	0.122914	2.82101	0.0772285	4.1719	0.0627647	0.206194	1.1971	0.855058	0.103103	0.180529	-2.4697	2.87234e-05	0.00652587	down	yes
MSTRG.62044	ITGA2	ENST00000296585	GO:0001540(amyloid-beta binding);GO:0001618(virus receptor activity);GO:0001666(response to hypoxia);GO:0002687(positive regulation of leukocyte migration);GO:0005178(integrin binding);GO:0005515(protein binding);GO:0005518(collagen binding);GO:0005634(nucleus);GO:0005886(plasma membrane);GO:0005925(focal adhesion);GO:0006929(substrate-dependent cell migration);GO:0006971(hypotonic response);GO:0…	04145(Phagosome);04151(PI3K-Akt signaling pathway);04510(Focal adhesion);04512(ECM-receptor interaction);04611(Platelet activation);04640(Hematopoietic cell lineage);04810(Regulation of actin cytoskeleton);05165(Human papillomavirus infection);05200(Pathways in cancer);05205(Proteoglycans in cancer);05222(Small cell lung cancer);05410(Hypertrophic cardiomyopathy (HCM));05412(Arrhythmogenic right …	K06481	NA	integrin subunit alpha 2 [Source:HGNC Symbol;Acc:HGNC:6137]	protein_coding	3.44151	2.69894	3.28009	0.66601	3.64948	1.70866	3.7858	0.911549	1.7715	1.38664	4.19087	1.99203	1.29563	1.17298	1.44635	0.891681	2.86409	4.32114	3.68001	2.84769	3.568	9.9537	7.16598	11.3521	0.374729	-1.41608	3.16385e-05	0.00706154	down	yes
MSTRG.8335	KIFAP3	ENST00000367765;ENST00000538366;ENST00000367767;ENST00000361580	GO:0000794(condensed nuclear chromosome);GO:0005515(protein binding);GO:0005783(endoplasmic reticulum);GO:0005794(Golgi apparatus);GO:0005813(centrosome);GO:0005829(cytosol);GO:0005871(kinesin complex);GO:0005876(spindle microtubule);GO:0005929(cilium);GO:0005930(axoneme);GO:0006890(retrograde vesicle-mediated transport, Golgi to endoplasmic reticulum);GO:0007017(microtubule-based process);GO:000…	NA	NA	NA	kinesin associated protein 3 [Source:HGNC Symbol;Acc:HGNC:17060]	protein_coding	2.20255	2.6163	2.81214	1.32239	2.53307	1.29336	2.03969	0.960111	1.46728	2.27636	2.01346	1.44975	1.0573	2.61494	0.8669	1.37855	2.7222	3.46303	2.90226	3.24178	2.65435	4.19694	2.47562	3.39828	0.576827	-0.79379	3.20435e-05	0.00711162	down	no
MSTRG.60818	CPE	ENST00000402744;ENST00000431967;ENST00000511992	GO:0003214(cardiac left ventricle morphogenesis);GO:0004180(carboxypeptidase activity);GO:0004181(metallocarboxypeptidase activity);GO:0005576(extracellular region);GO:0005615(extracellular space);GO:0005634(nucleus);GO:0005794(Golgi apparatus);GO:0005886(plasma membrane);GO:0006464(cellular protein modification process);GO:0006508(proteolysis);GO:0006518(peptide metabolic process);GO:0007218(neu…	04940(Type I diabetes mellitus);04940(Type I diabetes mellitus)	NA	NA	carboxypeptidase E [Source:HGNC Symbol;Acc:HGNC:2303]	protein_coding	4.64232	4.09643	4.74837	2.43538	5.07918	0.909109	3.90398	1.25085	2.47571	2.25674	1.22523	2.62082	1.5603	2.44109	0.981302	2.96632	7.48706	3.78238	4.42583	4.72858	12.942	7.66793	4.28375	4.73043	0.435513	-1.19921	3.20939e-05	0.00711162	down	yes
MSTRG.7994	PIGM	ENST00000368090	GO:0000030(mannosyltransferase activity);GO:0004376(glycolipid mannosyltransferase activity);GO:0005783(endoplasmic reticulum);GO:0005789(endoplasmic reticulum membrane);GO:0006506(GPI anchor biosynthetic process);GO:0016020(membrane);GO:0016021(integral component of membrane);GO:0016254(preassembly of GPI anchor in ER membrane);GO:0016740(transferase activity);GO:0016757(transferase activity, tr…	00563(Glycosylphosphatidylinositol (GPI)-anchor biosynthesis)	K05284	EC:2.4.1.-	phosphatidylinositol glycan anchor biosynthesis class M [Source:HGNC Symbol;Acc:HGNC:18858]	protein_coding	1.74663	2.17838	1.97517	0.963852	1.98881	1.1067	2.09086	1.04415	1.37244	2.01857	1.81746	1.59432	1.19462	1.82677	0.891439	1.09838	2.92204	2.39849	2.5647	2.3104	2.00945	3.6119	1.61179	4.27472	0.573838	-0.801285	3.23854e-05	0.007112	down	no
MSTRG.49561	LAMA5	ENST00000252999;ENST00000497053	GO:0001658(branching involved in ureteric bud morphogenesis);GO:0001738(morphogenesis of a polarized epithelium);GO:0001755(neural crest cell migration);GO:0001822(kidney development);GO:0001942(hair follicle development);GO:0005102(signaling receptor binding);GO:0005178(integrin binding);GO:0005201(extracellular matrix structural constituent);GO:0005515(protein binding);GO:0005576(extracellular …	04151(PI3K-Akt signaling pathway);04510(Focal adhesion);04512(ECM-receptor interaction);05145(Toxoplasmosis);05146(Amoebiasis);05165(Human papillomavirus infection);05200(Pathways in cancer);05222(Small cell lung cancer);05222(Small cell lung cancer)	NA	NA	laminin subunit alpha 5 [Source:HGNC Symbol;Acc:HGNC:6485]	protein_coding	15.7359	14.1182	10.6566	20.3315	13.7706	17.645	14.3942	31.9465	9.52128	17.2399	19.3429	30.4937	21.6596	20.3852	26.1675	37.7648	6.9504	10.4733	12.7771	12.9569	10.4718	10.2177	16.0913	8.09951	1.82406	0.867153	3.24047e-05	0.007112	up	no
MSTRG.2036	NRK	ENST00000536164;ENST00000540278;ENST00000243300	GO:0000166(nucleotide binding);GO:0004672(protein kinase activity);GO:0004674(protein serine/threonine kinase activity);GO:0005524(ATP binding);GO:0005737(cytoplasm);GO:0006468(protein phosphorylation);GO:0007256(activation of JNKK activity);GO:0007567(parturition);GO:0008285(negative regulation of cell population proliferation);GO:0016020(membrane);GO:0016021(integral component of membrane);GO:0…	NA	K16313	EC:2.7.11.1	Nik related kinase [Source:HGNC Symbol;Acc:HGNC:25391]	protein_coding	0.113523	0.109258	0.116864	0.014875	0.213591	0.0213639	0.135257	0.070805	0.0206398	0	0.00988735	0.160707	0.00949481	0.221922	0	0.0198891	4.12759	0.211467	0.133514	0.260931	0.26825	1.19433	0.534691	0.00888304	0.0918502	-3.44457	3.24127e-05	0.007112	down	yes
MSTRG.78690	ASPN	ENST00000375544;ENST00000651738;ENST00000375543	GO:0005509(calcium ion binding);GO:0005515(protein binding);GO:0005518(collagen binding);GO:0005576(extracellular region);GO:0005615(extracellular space);GO:0030021(extracellular matrix structural constituent conferring compression resistance);GO:0030282(bone mineralization);GO:0030512(negative regulation of transforming growth factor beta receptor signaling pathway);GO:0031012(extracellular matr…	NA	K08120	NA	asporin [Source:HGNC Symbol;Acc:HGNC:14872]	protein_coding	3.53127	2.36828	2.84781	0.952275	4.548	0.890034	3.65608	0.650106	1.10491	1.29737	0.723555	1.82473	1.0114	4.41091	0.931168	1.82173	5.04916	9.88409	9.56336	7.22457	6.70201	2.78286	3.14847	1.48027	0.355294	-1.49292	3.38762e-05	0.00739696	down	yes
MSTRG.15938	CD248	ENST00000311330	GO:0003674(molecular_function);GO:0005509(calcium ion binding);GO:0005737(cytoplasm);GO:0008150(biological_process);GO:0008284(positive regulation of cell population proliferation);GO:0009897(external side of plasma membrane);GO:0016020(membrane);GO:0016021(integral component of membrane);GO:0016477(cell migration);GO:0030246(carbohydrate binding);GO:0031012(extracellular matrix);GO:0048535(lymph…	NA	K06706	NA	CD248 molecule [Source:HGNC Symbol;Acc:HGNC:18219]	protein_coding	4.95085	4.15769	3.31456	3.0442	3.55629	3.17672	3.64661	2.1211	3.85156	2.58216	2.16317	6.07346	3.55262	2.92386	1.02815	3.97282	9.83231	13.4734	6.13284	8.51877	16.6363	6.56027	5.99518	1.24601	0.395612	-1.33784	3.52029e-05	0.00759175	down	yes
MSTRG.64734	GEMIN5	ENST00000285873	GO:0000340(RNA 7-methylguanosine cap binding);GO:0000387(spliceosomal snRNP assembly);GO:0000398(mRNA splicing, via spliceosome);GO:0003723(RNA binding);GO:0003730(mRNA 3'-UTR binding);GO:0005515(protein binding);GO:0005634(nucleus);GO:0005654(nucleoplasm);GO:0005737(cytoplasm);GO:0005829(cytosol);GO:0006397(mRNA processing);GO:0006412(translation);GO:0006417(regulation of translation);GO:0008380…	03013(RNA transport)	NA	NA	gem nuclear organelle associated protein 5 [Source:HGNC Symbol;Acc:HGNC:20043]	protein_coding	2.46675	2.87076	3.49132	2.73114	2.85828	1.64593	2.88013	1.95231	2.9874	2.91607	3.05231	2.99277	1.80176	3.40787	1.79008	2.7913	4.68283	5.3128	3.68331	3.19944	3.71792	4.87974	3.42681	5.47745	0.620067	-0.689505	3.60059e-05	0.00767866	down	no
MSTRG.69695	THBS2	ENST00000617924;ENST00000649844;ENST00000435791;ENST00000366787	GO:0005201(extracellular matrix structural constituent);GO:0005509(calcium ion binding);GO:0005515(protein binding);GO:0005576(extracellular region);GO:0005604(basement membrane);GO:0007155(cell adhesion);GO:0008201(heparin binding);GO:0016525(negative regulation of angiogenesis);GO:0031012(extracellular matrix);GO:0031091(platelet alpha granule);GO:0051965(positive regulation of synapse assembly…	04145(Phagosome);04151(PI3K-Akt signaling pathway);04510(Focal adhesion);04512(ECM-receptor interaction);05144(Malaria);05165(Human papillomavirus infection);05165(Human papillomavirus infection)	K04659	NA	thrombospondin 2 [Source:HGNC Symbol;Acc:HGNC:11786]	protein_coding	4.69633	3.38839	3.60077	1.41444	4.46432	1.49071	6.18267	1.72419	3.03419	2.54566	2.8027	16.6325	0.698721	5.15862	3.06368	4.6085	12.8956	42.0418	24.0506	7.28999	16.1621	12.6971	3.47306	2.03805	0.271477	-1.8811	3.60699e-05	0.00767866	down	yes
MSTRG.72889	SMO	ENST00000249373	GO:0000122(negative regulation of transcription by RNA polymerase II);GO:0001503(ossification);GO:0001570(vasculogenesis);GO:0001649(osteoblast differentiation);GO:0001701(in utero embryonic development);GO:0001708(cell fate specification);GO:0001755(neural crest cell migration);GO:0001947(heart looping);GO:0002052(positive regulation of neuroblast proliferation);GO:0002053(positive regulation of…	04340(Hedgehog signaling pathway);04360(Axon guidance);05200(Pathways in cancer);05205(Proteoglycans in cancer);05217(Basal cell carcinoma)	K06226	NA	smoothened, frizzled class receptor [Source:HGNC Symbol;Acc:HGNC:11119]	protein_coding	1.5135	1.6488	1.48001	1.31034	1.437	1.32199	2.27828	1.23409	1.83862	1.84172	0.670088	2.28607	1.52511	1.63428	0.96356	1.79244	1.78767	26.9034	4.45205	3.30296	4.10114	0.970045	2.58734	0.644759	0.276829	-1.85293	3.70082e-05	0.00785159	down	yes
MSTRG.38017	TNFRSF11A	ENST00000586569;ENST00000269485;ENST00000617039;ENST00000639222;ENST00000616710	GO:0001503(ossification);GO:0002250(adaptive immune response);GO:0002548(monocyte chemotaxis);GO:0004888(transmembrane signaling receptor activity);GO:0005031(tumor necrosis factor-activated receptor activity);GO:0005515(protein binding);GO:0005829(cytosol);GO:0005886(plasma membrane);GO:0007165(signal transduction);GO:0007267(cell-cell signaling);GO:0007275(multicellular organism development);GO…	04060(Cytokine-cytokine receptor interaction);04064(NF-kappa B signaling pathway);04380(Osteoclast differentiation);04917(Prolactin signaling pathway);05323(Rheumatoid arthritis);05323(Rheumatoid arthritis)	K05147	NA	TNF receptor superfamily member 11a [Source:HGNC Symbol;Acc:HGNC:11908]	protein_coding	0.912977	0.629535	0.468552	0.27188	0.367319	0.462152	0.466869	0.192583	0.337263	0.490645	0.330706	0.336365	0.486952	0.812629	0.177741	0.47262	1.63768	1.07705	0.767751	0.566731	1.11075	1.00183	0.313106	2.3896	0.407061	-1.29668	3.73444e-05	0.00790423	down	yes
ENSG00000157766	ACAN	ENST00000560601;ENST00000439576;ENST00000558207;ENST00000558704	GO:0001501(skeletal system development);GO:0001502(cartilage condensation);GO:0002063(chondrocyte development);GO:0005201(extracellular matrix structural constituent);GO:0005509(calcium ion binding);GO:0005515(protein binding);GO:0005540(hyaluronic acid binding);GO:0005576(extracellular region);GO:0005604(basement membrane);GO:0005796(Golgi lumen);GO:0006508(proteolysis);GO:0007155(cell adhesion)…	NA	NA	NA	aggrecan [Source:HGNC Symbol;Acc:HGNC:319]	protein_coding	0.0977476	0.106563	0.0468128	0.032852	0.0912398	0.0556025	0.114333	0.029946	0.0764592	0.0149385	0.0132738	0.131012	0.0836209	0.0887931	0.059068	0.0592805	0.45497	0.529778	0.324245	0.175958	0.64323	0.127854	0.024804	0.0136243	0.240044	-2.05863	3.78919e-05	0.00798247	down	yes
MSTRG.7766	HAX1	ENST00000457918;ENST00000328703;ENST00000435087;ENST00000483970;ENST00000532105	GO:0000932(P-body);GO:0005515(protein binding);GO:0005634(nucleus);GO:0005635(nuclear envelope);GO:0005667(transcription factor complex);GO:0005737(cytoplasm);GO:0005739(mitochondrion);GO:0005741(mitochondrial outer membrane);GO:0005758(mitochondrial intermembrane space);GO:0005783(endoplasmic reticulum);GO:0005886(plasma membrane);GO:0005938(cell cortex);GO:0014068(positive regulation of phospha…	NA	K16220	NA	HCLS1 associated protein X-1 [Source:HGNC Symbol;Acc:HGNC:16915]	protein_coding	5.47063	4.38618	5.71343	4.02102	5.30245	3.26618	6.71489	3.7891	5.22489	4.92966	4.71764	4.01452	3.25234	5.28489	2.52657	3.58415	5.32942	6.60725	6.95675	6.84432	7.29833	9.24783	5.47848	9.71404	0.628071	-0.671001	3.82095e-05	0.00801243	down	no
MSTRG.35715	RAD51C	ENST00000583539;ENST00000337432;ENST00000413590;ENST00000425173;ENST00000421782;ENST00000461271;ENST00000584804;ENST00000622327	GO:0000166(nucleotide binding);GO:0000400(four-way junction DNA binding);GO:0000722(telomere maintenance via recombination);GO:0000724(double-strand break repair via homologous recombination);GO:0003677(DNA binding);GO:0005515(protein binding);GO:0005524(ATP binding);GO:0005634(nucleus);GO:0005654(nucleoplasm);GO:0005657(replication fork);GO:0005694(chromosome);GO:0005737(cytoplasm);GO:0005739(mi…	03440(Homologous recombination);03460(Fanconi anemia pathway);03460(Fanconi anemia pathway)	K10870	NA	RAD51 paralog C [Source:HGNC Symbol;Acc:HGNC:9820]	protein_coding	0.466958	0.369083	0.379008	0.0926862	0.3617	0.245858	0.3008	0.170982	0.351898	0.339797	0.355549	0.257657	0.160242	0.264035	0.121303	0.223017	0.558499	0.563556	0.486969	0.463599	0.528393	0.386251	0.512088	0.525272	0.55416	-0.851625	3.85163e-05	0.00804109	down	no
MSTRG.60034	MAD2L1	ENST00000296509	GO:0000070(mitotic sister chromatid segregation);GO:0000132(establishment of mitotic spindle orientation);GO:0000775(chromosome, centromeric region);GO:0000776(kinetochore);GO:0000777(condensed chromosome kinetochore);GO:0000922(spindle pole);GO:0005515(protein binding);GO:0005634(nucleus);GO:0005654(nucleoplasm);GO:0005694(chromosome);GO:0005737(cytoplasm);GO:0005829(cytosol);GO:0005856(cytoskel…	04110(Cell cycle);04114(Oocyte meiosis);04914(Progesterone-mediated oocyte maturation);05166(Human T-cell leukemia virus 1 infection)	K02537	NA	mitotic arrest deficient 2 like 1 [Source:HGNC Symbol;Acc:HGNC:6763]	protein_coding	0.295108	0.345717	0.150196	0.0610121	0.218037	0.0672664	0.0990067	0.0499156	0.223053	0.167781	0.198309	0.215354	0.112227	0.130938	0.0448928	0.167677	1.07198	0.461193	0.240842	0.207605	0.347476	0.650642	0.254647	0.225348	0.368018	-1.44215	3.85285e-05	0.00804109	down	yes
MSTRG.56303	GPR87	ENST00000260843	GO:0004930(G protein-coupled receptor activity);GO:0005886(plasma membrane);GO:0007165(signal transduction);GO:0007186(G protein-coupled receptor signaling pathway);GO:0007194(negative regulation of adenylate cyclase activity);GO:0008150(biological_process);GO:0016020(membrane);GO:0016021(integral component of membrane);GO:0035589(G protein-coupled purinergic nucleotide receptor signaling pathway…	NA	K08389	NA	G protein-coupled receptor 87 [Source:HGNC Symbol;Acc:HGNC:4538]	protein_coding	0.00928501	0.0578682	0	0	0.0940694	0.0880447	0.167201	0	0.0285096	0.00849177	0.184374	0.236095	0.0386069	0.0821062	0.0901616	0	1.7127	0.724725	0.431674	0.590297	0.472364	0.463927	0.14772	0.0552145	0.11795	-3.08375	3.88914e-05	0.00809797	down	yes
MSTRG.52235	PMM1	ENST00000216259	GO:0004615(phosphomannomutase activity);GO:0005515(protein binding);GO:0005737(cytoplasm);GO:0005829(cytosol);GO:0006013(mannose metabolic process);GO:0006487(protein N-linked glycosylation);GO:0009298(GDP-mannose biosynthetic process);GO:0016853(isomerase activity);GO:0043025(neuronal cell body);GO:0045047(protein targeting to ER);GO:0046872(metal ion binding);GO:1990830(cellular response to leu…	00051(Fructose and mannose metabolism);00520(Amino sugar and nucleotide sugar metabolism)	K17497	EC:5.4.2.8	phosphomannomutase 1 [Source:HGNC Symbol;Acc:HGNC:9114]	protein_coding	2.77035	2.37326	4.48578	7.18361	3.48332	1.70073	4.7479	4.09484	3.96097	6.3138	1.17237	1.15745	2.86542	2.7496	3.6884	4.02577	1.64698	1.83956	1.65476	2.24202	1.34642	1.78927	1.92332	2.12088	1.94921	0.962892	3.91176e-05	0.00810746	up	no
MSTRG.39094	PRDX2	ENST00000301522;ENST00000334482	GO:0000187(activation of MAPK activity);GO:0002536(respiratory burst involved in inflammatory response);GO:0004601(peroxidase activity);GO:0005515(protein binding);GO:0005737(cytoplasm);GO:0005829(cytosol);GO:0006979(response to oxidative stress);GO:0008379(thioredoxin peroxidase activity);GO:0010310(regulation of hydrogen peroxide metabolic process);GO:0016209(antioxidant activity);GO:0016491(ox…	NA	K03386	EC:1.11.1.15	peroxiredoxin 2 [Source:HGNC Symbol;Acc:HGNC:9353]	protein_coding	15.9639	16.3972	13.5494	7.7009	10.1213	7.02153	13.9572	11.1021	11.9983	8.26002	9.07944	12.0026	5.68412	9.40181	8.42178	9.98111	32.0772	18.6062	15.0646	15.2205	14.6879	19.6995	13.7179	24.686	0.554901	-0.849698	3.99226e-05	0.00825524	down	no
MSTRG.4865	TMEM125	ENST00000432792;ENST00000456751;ENST00000439858	GO:0003674(molecular_function);GO:0005575(cellular_component);GO:0008150(biological_process);GO:0016020(membrane);GO:0016021(integral component of membrane);GO:0016021(integral component of membrane)	NA	NA	NA	transmembrane protein 125 [Source:HGNC Symbol;Acc:HGNC:28275]	protein_coding	22.1177	8.64125	9.3095	19.7496	24.9519	11.2485	25.8068	27.5461	7.68058	20.4379	12.6303	7.09903	15.3242	17.5721	10.2635	18.6006	9.82001	7.1189	11.2447	5.64138	7.61811	13.7236	7.10858	4.14267	1.94962	0.963192	4.06769e-05	0.00835082	up	no
MSTRG.7810	GBA	ENST00000427500;ENST00000368373;ENST00000428024;ENST00000327247	GO:0004348(glucosylceramidase activity);GO:0005102(signaling receptor binding);GO:0005124(scavenger receptor binding);GO:0005515(protein binding);GO:0005615(extracellular space);GO:0005764(lysosome);GO:0005765(lysosomal membrane);GO:0005783(endoplasmic reticulum);GO:0005794(Golgi apparatus);GO:0005802(trans-Golgi network);GO:0006629(lipid metabolic process);GO:0006665(sphingolipid metabolic proce…	00511(Other glycan degradation);00600(Sphingolipid metabolism);04142(Lysosome);04142(Lysosome)	NA	NA	glucosylceramidase beta [Source:HGNC Symbol;Acc:HGNC:4177]	protein_coding	2.2553	3.68141	2.70789	1.92736	2.50405	1.20322	2.90037	1.39169	2.35122	2.62597	1.78438	1.90054	1.39061	3.33374	1.28644	2.18651	3.71768	3.83166	3.96325	3.52333	2.74721	4.81186	2.72204	3.97586	0.604766	-0.72555	4.20764e-05	0.0085625	down	no
MSTRG.11675	CSGALNACT2	ENST00000374466	GO:0000139(Golgi membrane);GO:0005515(protein binding);GO:0005794(Golgi apparatus);GO:0008376(acetylgalactosaminyltransferase activity);GO:0016020(membrane);GO:0016021(integral component of membrane);GO:0016740(transferase activity);GO:0030166(proteoglycan biosynthetic process);GO:0030173(integral component of Golgi membrane);GO:0030206(chondroitin sulfate biosynthetic process);GO:0032580(Golgi c…	00532(Glycosaminoglycan biosynthesis - chondroitin sulfate / dermatan sulfate)	K00746	2.4.1.175;EC:2.4.1.174	chondroitin sulfate N-acetylgalactosaminyltransferase 2 [Source:HGNC Symbol;Acc:HGNC:24292]	protein_coding	4.88126	4.45871	3.93486	1.67076	4.11876	1.62703	2.95621	1.44595	2.50699	2.61137	2.05698	2.76605	1.85392	1.7644	1.52227	2.10904	4.31608	4.72195	4.55037	4.60939	4.70612	4.18249	3.958	5.19147	0.583463	-0.777288	4.23969e-05	0.00858876	down	no
MSTRG.3141	HES5	ENST00000378453	GO:0000122(negative regulation of transcription by RNA polymerase II);GO:0000790(nuclear chromatin);GO:0000977(RNA polymerase II regulatory region sequence-specific DNA binding);GO:0000981(DNA-binding transcription factor activity, RNA polymerase II-specific);GO:0001227(DNA-binding transcription repressor activity, RNA polymerase II-specific);GO:0003677(DNA binding);GO:0003682(chromatin binding);…	04330(Notch signaling pathway);05165(Human papillomavirus infection);05200(Pathways in cancer);05224(Breast cancer)	K06055	NA	hes family bHLH transcription factor 5 [Source:HGNC Symbol;Acc:HGNC:19764]	protein_coding	0.45056	0.168856	0.463667	0.539696	0.678825	0.409563	1.3035	2.09007	1.61027	1.57521	1.15595	2.3418	0.610686	1.44262	0.998367	1.01394	0.357008	0.287	0.243757	0.545617	0.269542	0.704267	0.753095	0.197426	2.50968	1.3275	4.35907e-05	0.00876079	up	yes
MSTRG.858	SLC38A5	ENST00000595796;ENST00000416711;ENST00000413668;ENST00000440085;ENST00000622196;ENST00000619100;ENST00000441948;ENST00000620913	GO:0003333(amino acid transmembrane transport);GO:0005290(L-histidine transmembrane transporter activity);GO:0005886(plasma membrane);GO:0005887(integral component of plasma membrane);GO:0006865(amino acid transport);GO:0006868(glutamine transport);GO:0015171(amino acid transmembrane transporter activity);GO:0015182(L-asparagine transmembrane transporter activity);GO:0015186(L-glutamine transmemb…	04727(GABAergic synapse);04727(GABAergic synapse)	K14992	NA	solute carrier family 38 member 5 [Source:HGNC Symbol;Acc:HGNC:18070]	protein_coding	1.3837	1.84439	3.27693	0.70382	1.69203	0.911135	1.24804	0.868863	2.36296	1.38844	0.25781	0.843557	0.795057	1.52805	0.975069	0.853802	14.5585	3.81	2.98021	3.55575	4.04077	2.48194	2.46702	0.286616	0.30622	-1.70736	4.44548e-05	0.00889977	down	yes
MSTRG.42673	DHX57	ENST00000457308;ENST00000442331	GO:0000166(nucleotide binding);GO:0003676(nucleic acid binding);GO:0003723(RNA binding);GO:0003724(RNA helicase activity);GO:0004386(helicase activity);GO:0005515(protein binding);GO:0005524(ATP binding);GO:0016787(hydrolase activity);GO:0046872(metal ion binding);GO:0046872(metal ion binding)	NA	K13026	EC:3.6.4.13	DExH-box helicase 57 [Source:HGNC Symbol;Acc:HGNC:20086]	protein_coding	1.30763	1.12424	1.54469	0.579341	1.27724	0.857794	1.01056	0.678795	1.0287	1.12258	0.866107	0.890145	0.825664	1.11668	0.831763	0.73341	1.82996	1.52795	1.17421	1.49367	1.35983	1.7125	1.27829	1.94318	0.641066	-0.641455	4.51689e-05	0.00900752	down	no
MSTRG.43630	TGFA	ENST00000295400;ENST00000394241;ENST00000418333;ENST00000445399;ENST00000444975;ENST00000450929	GO:0000139(Golgi membrane);GO:0000165(MAPK cascade);GO:0000187(activation of MAPK activity);GO:0001525(angiogenesis);GO:0005154(epidermal growth factor receptor binding);GO:0005515(protein binding);GO:0005576(extracellular region);GO:0005615(extracellular space);GO:0005634(nucleus);GO:0005789(endoplasmic reticulum membrane);GO:0005886(plasma membrane);GO:0006357(regulation of transcription by RNA…	01521(EGFR tyrosine kinase inhibitor resistance);04010(MAPK signaling pathway);04012(ErbB signaling pathway);04014(Ras signaling pathway);04151(PI3K-Akt signaling pathway);04915(Estrogen signaling pathway);05200(Pathways in cancer);05210(Colorectal cancer);05211(Renal cell carcinoma);05212(Pancreatic cancer);05214(Glioma);05215(Prostate cancer);05223(Non-small cell lung cancer);05225(Hepatocellul…	K08774	NA	transforming growth factor alpha [Source:HGNC Symbol;Acc:HGNC:11765]	protein_coding	1.92088	1.61245	2.16317	0.865362	1.66056	0.878979	1.12955	0.812099	1.32157	1.35446	4.53149	6.52351	0.686152	1.80648	1.43691	1.22926	48.3451	3.36575	7.65042	1.31618	1.17899	1.97776	1.06098	7.51822	0.20668	-2.27453	4.52669e-05	0.00900752	down	yes
MSTRG.66773	GLP1R	ENST00000373256	GO:0004888(transmembrane signaling receptor activity);GO:0004930(G protein-coupled receptor activity);GO:0004967(glucagon receptor activity);GO:0005515(protein binding);GO:0005886(plasma membrane);GO:0005887(integral component of plasma membrane);GO:0007165(signal transduction);GO:0007166(cell surface receptor signaling pathway);GO:0007186(G protein-coupled receptor signaling pathway);GO:0007188(…	04024(cAMP signaling pathway);04080(Neuroactive ligand-receptor interaction);04911(Insulin secretion)	K04581	NA	glucagon like peptide 1 receptor [Source:HGNC Symbol;Acc:HGNC:4324]	protein_coding	0.090123	0.121444	0.117295	0.039669	0.023002	0.314669	0.239142	0.141191	0.198563	0.100002	0.067993	0.120458	0.254292	0.129384	0.082627	0.097904	0.635632	0.096857	0.103532	0.085323	0.177786	0.107592	0.302883	4.97815	0.164753	-2.60162	4.6275e-05	0.00916745	down	yes
MSTRG.65333	SCGB3A1	ENST00000292641	GO:0005125(cytokine activity);GO:0005515(protein binding);GO:0005576(extracellular region);GO:0005615(extracellular space);GO:0007165(signal transduction);GO:0030308(negative regulation of cell growth);GO:0042127(regulation of cell population proliferation);GO:0070062(extracellular exosome);GO:1901741(positive regulation of myoblast fusion)	NA	NA	NA	secretoglobin family 3A member 1 [Source:HGNC Symbol;Acc:HGNC:18384]	protein_coding	146.937	13.9727	1158.42	1122.19	2369.04	972.75	2363.58	10469.7	2541.5	1341.89	563.575	1986.62	139.766	325.467	21.0325	7636.31	5.18323	252.454	1094.41	122.981	71.8785	97.4939	52.7382	9.10138	9.72102	3.28111	4.63901e-05	0.00917001	up	yes
MSTRG.16502	KCTD21	ENST00000529350;ENST00000525447;ENST00000340067;ENST00000530018;ENST00000528776;ENST00000526208	GO:0005515(protein binding);GO:0006511(ubiquitin-dependent protein catabolic process);GO:0016567(protein ubiquitination);GO:0040008(regulation of growth);GO:0042802(identical protein binding);GO:0042826(histone deacetylase binding);GO:0045879(negative regulation of smoothened signaling pathway);GO:0051260(protein homooligomerization);GO:0097602(cullin family protein binding);GO:0097602(cullin fam…	NA	K21922	NA	potassium channel tetramerization domain containing 21 [Source:HGNC Symbol;Acc:HGNC:27452]	protein_coding	1.8832	1.85203	1.81292	1.57326	2.03262	0.482184	1.79444	0.903992	1.63235	0.529705	2.39985	2.28495	0.722786	2.35209	1.1838	1.56087	2.89741	37.9339	2.55787	2.11844	1.87559	1.86567	1.52573	1.08918	0.241026	-2.05274	4.85974e-05	0.00946047	down	yes
MSTRG.15992	SYT12	ENST00000525457;ENST00000527043;ENST00000533427;ENST00000393946	GO:0000149(SNARE binding);GO:0001786(phosphatidylserine binding);GO:0005509(calcium ion binding);GO:0005544(calcium-dependent phospholipid binding);GO:0005886(plasma membrane);GO:0008021(synaptic vesicle);GO:0014059(regulation of dopamine secretion);GO:0016020(membrane);GO:0016021(integral component of membrane);GO:0016192(vesicle-mediated transport);GO:0017156(calcium-ion regulated exocytosis);G…	NA	K19912	NA	synaptotagmin 12 [Source:HGNC Symbol;Acc:HGNC:18381]	protein_coding	0.0116953	0.0277142	0.196278	0.00233542	0.135796	0.0134358	0.434749	0.00521912	0.0381063	0.00943219	0.0111003	0.793783	0.0222753	0.714166	0.00966139	0.0189445	5.86402	0.827624	0.255357	0.253263	0.0792121	0.27839	0.544217	7.79564	0.0768881	-3.7011	4.92554e-05	0.00956781	down	yes
MSTRG.49082	UBE2C	ENST00000356455;ENST00000372568;ENST00000405520;ENST00000352551;ENST00000617055;ENST00000335046	GO:0000151(ubiquitin ligase complex);GO:0000166(nucleotide binding);GO:0000209(protein polyubiquitination);GO:0004842(ubiquitin-protein transferase activity);GO:0005515(protein binding);GO:0005524(ATP binding);GO:0005634(nucleus);GO:0005654(nucleoplasm);GO:0005680(anaphase-promoting complex);GO:0005829(cytosol);GO:0005886(plasma membrane);GO:0006511(ubiquitin-dependent protein catabolic process);…	04120(Ubiquitin mediated proteolysis);04120(Ubiquitin mediated proteolysis)	K06688	EC:2.3.2.23	ubiquitin conjugating enzyme E2 C [Source:HGNC Symbol;Acc:HGNC:15937]	protein_coding	0.73883	1.07144	0.911533	0.253641	0.437714	0.219223	0.48659	0.297521	0.208423	0.349488	0.985238	1.16151	0.316726	0.788735	0.638623	0.437213	6.88651	4.81322	0.521039	0.82548	0.697371	3.12562	0.55182	0.408189	0.260876	-1.93856	5.25561e-05	0.0101869	down	yes
MSTRG.45941	HOXD11;HOXD10	ENST00000249504;ENST00000249501	GO:0000790(nuclear chromatin);GO:0000981(DNA-binding transcription factor activity, RNA polymerase II-specific);GO:0001658(branching involved in ureteric bud morphogenesis);GO:0003677(DNA binding);GO:0005634(nucleus);GO:0005654(nucleoplasm);GO:0006355(regulation of transcription, DNA-templated);GO:0006357(regulation of transcription by RNA polymerase II);GO:0007275(multicellular organism developm…	05205(Proteoglycans in cancer);05206(MicroRNAs in cancer)	K09296;K09295	NA	homeobox D11 [Source:HGNC Symbol;Acc:HGNC:5134];homeobox D10 [Source:HGNC Symbol;Acc:HGNC:5133]	protein_coding	0	0	0.0193934	0.0069154	0.0131567	0.029099	0.0171132	0	0.0246489	0	0	0.0145862	0.00882982	0.0115808	0.0156313	0	0.0418804	0.0423596	0.0125252	0.0137934	0.00964952	2.78574	0.0121594	0	0.0275786	-5.18031	5.60521e-05	0.01068	down	yes
MSTRG.47410	TRPM8	ENST00000324695;ENST00000409625;ENST00000355722	GO:0005216(ion channel activity);GO:0005262(calcium channel activity);GO:0005515(protein binding);GO:0005783(endoplasmic reticulum);GO:0005789(endoplasmic reticulum membrane);GO:0005886(plasma membrane);GO:0006811(ion transport);GO:0006812(cation transport);GO:0006816(calcium ion transport);GO:0006874(cellular calcium ion homeostasis);GO:0009266(response to temperature stimulus);GO:0009409(respon…	04750(Inflammatory mediator regulation of TRP channels);04750(Inflammatory mediator regulation of TRP channels)	K04983	NA	transient receptor potential cation channel subfamily M member 8 [Source:HGNC Symbol;Acc:HGNC:17961]	protein_coding	0.0177303	0	0.00614332	0	0.0590252	0	0.00487349	0	0	0	0.00581508	0.0210262	0	0.0158245	0	0.00549532	2.24585	0.0289282	0.0680984	0	0.0903622	0.258888	0	0.107345	0.0242784	-5.36418	6.00145e-05	0.011244	down	yes
MSTRG.31258	DCTPP1	ENST00000319285;ENST00000565758;ENST00000568973;ENST00000568434	GO:0000166(nucleotide binding);GO:0000287(magnesium ion binding);GO:0005515(protein binding);GO:0005634(nucleus);GO:0005737(cytoplasm);GO:0005739(mitochondrion);GO:0005829(cytosol);GO:0006253(dCTP catabolic process);GO:0009143(nucleoside triphosphate catabolic process);GO:0016462(pyrophosphatase activity);GO:0016787(hydrolase activity);GO:0032556(pyrimidine deoxyribonucleotide binding);GO:0042262…	00240(Pyrimidine metabolism);00240(Pyrimidine metabolism)	K16904	EC:3.6.1.12	dCTP pyrophosphatase 1 [Source:HGNC Symbol;Acc:HGNC:28777]	protein_coding	4.73395	6.83774	6.40625	2.00754	5.40191	1.67908	6.00414	4.89976	4.21482	5.16389	4.89474	5.62424	2.72817	5.78514	3.19989	4.25762	11.1739	14.0557	8.77734	8.67319	4.63426	11.9364	5.87538	6.0996	0.518344	-0.948019	6.07034e-05	0.0113258	down	no
MSTRG.64486	LARS1	ENST00000510191;ENST00000674174;ENST00000674191;ENST00000674398;ENST00000674277;ENST00000674270;ENST00000674158;ENST00000394434	GO:0000166(nucleotide binding);GO:0002161(aminoacyl-tRNA editing activity);GO:0004812(aminoacyl-tRNA ligase activity);GO:0004819(glutamine-tRNA ligase activity);GO:0004823(leucine-tRNA ligase activity);GO:0005096(GTPase activator activity);GO:0005515(protein binding);GO:0005524(ATP binding);GO:0005737(cytoplasm);GO:0005764(lysosome);GO:0005783(endoplasmic reticulum);GO:0005829(cytosol);GO:0006412…	00970(Aminoacyl-tRNA biosynthesis);00970(Aminoacyl-tRNA biosynthesis)	K01869	EC:6.1.1.4	leucyl-tRNA synthetase 1 [Source:HGNC Symbol;Acc:HGNC:6512]	protein_coding	1.90811	1.93262	2.75553	1.58723	2.34053	1.26007	2.25013	1.30633	1.46834	3.07877	2.30367	1.76196	1.06961	2.81415	1.0679	1.99771	3.88815	3.47743	2.59434	2.3349	3.00108	3.5267	2.75272	5.79768	0.564473	-0.825022	6.28043e-05	0.0115734	down	no
MSTRG.35767	HEATR6	ENST00000184956;ENST00000593228;ENST00000613428;ENST00000593097	GO:0003723(RNA binding);GO:0003723(RNA binding)	NA	NA	NA	HEAT repeat containing 6 [Source:HGNC Symbol;Acc:HGNC:24076]	protein_coding	2.71211	2.12723	2.21269	1.08709	2.03248	1.18755	1.79054	1.09185	1.83055	2.24373	1.59053	1.65728	1.16451	1.77424	1.18379	1.73287	2.79655	1.94442	3.05051	2.63605	2.2501	2.7442	2.01712	2.96088	0.672041	-0.573379	6.36211e-05	0.011676	down	no
MSTRG.8933	CFH;CFHR3;CFHR1	ENST00000630130;ENST00000367425;ENST00000320493;ENST00000367429;ENST00000471440	GO:0002376(immune system process);GO:0005515(protein binding);GO:0005576(extracellular region);GO:0005615(extracellular space);GO:0006956(complement activation);GO:0006957(complement activation, alternative pathway);GO:0008201(heparin binding);GO:0016032(viral process);GO:0030449(regulation of complement activation);GO:0042802(identical protein binding);GO:0043395(heparan sulfate proteoglycan bin…	04610(Complement and coagulation cascades);05150(Staphylococcus aureus infection);05150(Staphylococcus aureus infection)	K04004	NA	complement factor H [Source:HGNC Symbol;Acc:HGNC:4883];complement factor H related 3 [Source:HGNC Symbol;Acc:HGNC:16980];complement factor H related 1 [Source:HGNC Symbol;Acc:HGNC:4888]	protein_coding	3.80444	2.68795	1.973	1.12864	3.03337	0.923855	2.14313	0.868028	1.4289	1.58251	1.54312	2.81132	0.788281	2.0862	0.646478	1.86718	2.05321	7.0162	4.7615	3.87389	4.28671	8.35964	1.86136	1.86823	0.430102	-1.21725	6.48587e-05	0.0118788	down	yes
MSTRG.64051	CAMLG	ENST00000297156;ENST00000514518	GO:0001881(receptor recycling);GO:0005515(protein binding);GO:0005737(cytoplasm);GO:0005783(endoplasmic reticulum);GO:0006952(defense response);GO:0007165(signal transduction);GO:0007173(epidermal growth factor receptor signaling pathway);GO:0016020(membrane);GO:0016021(integral component of membrane);GO:0016032(viral process);GO:0031397(negative regulation of protein ubiquitination);GO:0031625(u…	NA	NA	NA	calcium modulating ligand [Source:HGNC Symbol;Acc:HGNC:1471]	protein_coding	2.56181	2.65253	2.32426	1.46506	2.5462	1.68584	2.74683	1.34289	2.5027	2.21055	1.57151	2.4177	1.33578	2.25477	1.73898	1.8238	4.33218	2.48155	2.70733	2.73801	3.13712	3.81917	2.84173	8.57014	0.541695	-0.884448	6.58878e-05	0.0119938	down	no
MSTRG.20098	GDF11	ENST00000257868	GO:0001501(skeletal system development);GO:0001656(metanephros development);GO:0001657(ureteric bud development);GO:0005125(cytokine activity);GO:0005515(protein binding);GO:0005576(extracellular region);GO:0005615(extracellular space);GO:0005654(nucleoplasm);GO:0007165(signal transduction);GO:0007399(nervous system development);GO:0007498(mesoderm development);GO:0008083(growth factor activity);…	04060(Cytokine-cytokine receptor interaction)	K22679	NA	growth differentiation factor 11 [Source:HGNC Symbol;Acc:HGNC:4216]	protein_coding	1.7142	1.84911	1.31454	0.886197	1.3882	0.844885	1.20954	0.743004	1.57728	1.5991	0.864498	1.15947	1.20621	1.16938	1.17464	1.109	1.47166	1.48932	1.53518	2.06854	1.91626	2.24511	2.41889	2.20152	0.645401	-0.631733	6.64216e-05	0.0120665	down	no
MSTRG.72120	DLX5	ENST00000648378;ENST00000486603	GO:0000790(nuclear chromatin);GO:0000976(transcription regulatory region sequence-specific DNA binding);GO:0000978(RNA polymerase II cis-regulatory region sequence-specific DNA binding);GO:0000981(DNA-binding transcription factor activity, RNA polymerase II-specific);GO:0001228(DNA-binding transcription activator activity, RNA polymerase II-specific);GO:0001501(skeletal system development);GO:000…	04550(Signaling pathways regulating pluripotency of stem cells);04550(Signaling pathways regulating pluripotency of stem cells)	K18489	NA	distal-less homeobox 5 [Source:HGNC Symbol;Acc:HGNC:2918]	protein_coding	0.0762589	0	0	0.0987811	0	0	0.108955	0	0.113577	0.0621082	0	0.11971	0.138543	0.0984177	0.0778461	0.0485275	0.31389	0.610999	0.115118	0.422368	0.330097	2.68292	0.262179	0.0495796	0.0984641	-3.34426	6.8484e-05	0.0123165	down	yes
MSTRG.25174	NID2	ENST00000216286;ENST00000556572;ENST00000617139	GO:0005201(extracellular matrix structural constituent);GO:0005509(calcium ion binding);GO:0005515(protein binding);GO:0005518(collagen binding);GO:0005576(extracellular region);GO:0005604(basement membrane);GO:0005886(plasma membrane);GO:0007155(cell adhesion);GO:0007160(cell-matrix adhesion);GO:0030198(extracellular matrix organization);GO:0031012(extracellular matrix);GO:0062023(collagen-conta…	NA	K06826	NA	nidogen 2 [Source:HGNC Symbol;Acc:HGNC:13389]	protein_coding	1.33915	1.34548	1.32814	0.745018	1.9166	1.15734	1.28482	0.468819	1.1437	0.755494	0.352838	1.1162	0.969807	2.00718	0.56796	0.887928	3.25222	6.37793	2.31425	2.43844	4.96207	1.35952	1.62814	0.492774	0.380859	-1.39267	6.89693e-05	0.012379	down	yes
MSTRG.35497	COL1A1	ENST00000225964;ENST00000507689	GO:0001501(skeletal system development);GO:0001503(ossification);GO:0001568(blood vessel development);GO:0001649(osteoblast differentiation);GO:0001957(intramembranous ossification);GO:0001958(endochondral ossification);GO:0002020(protease binding);GO:0005201(extracellular matrix structural constituent);GO:0005515(protein binding);GO:0005576(extracellular region);GO:0005581(collagen trimer);GO:00…	04151(PI3K-Akt signaling pathway);04510(Focal adhesion);04512(ECM-receptor interaction);04611(Platelet activation);04926(Relaxin signaling pathway);04933(AGE-RAGE signaling pathway in diabetic complications);04974(Protein digestion and absorption);05146(Amoebiasis);05165(Human papillomavirus infection);05165(Human papillomavirus infection)	K06236	NA	collagen type I alpha 1 chain [Source:HGNC Symbol;Acc:HGNC:2197]	protein_coding	35.9988	42.8577	42.3105	30.2443	39.3356	60.9851	86.1321	25.5525	122.917	25.555	15.0454	93.725	14.1159	85.0713	32.9719	39.5545	178.693	479.263	135.798	168.578	322.044	80.3444	45.0624	11.0938	0.278832	-1.84253	7.0758e-05	0.0125708	down	yes
MSTRG.16143	SHANK2	ENST00000426687;ENST00000409161;ENST00000654939;ENST00000659264;ENST00000449833;ENST00000656230;ENST00000645599	GO:0001750(photoreceptor outer segment);GO:0001917(photoreceptor inner segment);GO:0005515(protein binding);GO:0005575(cellular_component);GO:0005737(cytoplasm);GO:0005829(cytosol);GO:0005883(neurofilament);GO:0005886(plasma membrane);GO:0007416(synapse assembly);GO:0007612(learning);GO:0007613(memory);GO:0008328(ionotropic glutamate receptor complex);GO:0014069(postsynaptic density);GO:0016020(m…	04724(Glutamatergic synapse);04724(Glutamatergic synapse)	K15009	NA	SH3 and multiple ankyrin repeat domains 2 [Source:HGNC Symbol;Acc:HGNC:14295]	protein_coding	1.74834	1.6664	2.87672	1.67583	2.43022	1.1311	2.26847	2.20203	2.95674	2.17024	3.04225	1.82585	1.98181	3.28614	2.62477	3.08197	1.3939	1.3887	1.71823	2.14631	0.70079	1.75516	1.93948	0.740225	1.56876	0.649629	7.20236e-05	0.0127232	up	no
MSTRG.36174	KPNA2	ENST00000330459;ENST00000579754;ENST00000537025;ENST00000584026	GO:0000018(regulation of DNA recombination);GO:0000139(Golgi membrane);GO:0003723(RNA binding);GO:0005515(protein binding);GO:0005634(nucleus);GO:0005654(nucleoplasm);GO:0005737(cytoplasm);GO:0005783(endoplasmic reticulum);GO:0005789(endoplasmic reticulum membrane);GO:0005794(Golgi apparatus);GO:0005829(cytosol);GO:0006259(DNA metabolic process);GO:0006606(protein import into nucleus);GO:0006607(…	05164(Influenza A);05164(Influenza A)	K15043	NA	karyopherin subunit alpha 2 [Source:HGNC Symbol;Acc:HGNC:6395]	protein_coding	4.6121	3.76885	2.25667	1.23716	2.57986	1.50378	1.99105	0.868578	2.03479	2.18649	2.16665	3.05816	0.801075	2.58987	1.12433	1.82689	7.06404	6.3137	3.76343	3.09107	2.69875	7.9586	2.74691	3.43627	0.466734	-1.09933	7.2443e-05	0.0127232	down	yes
MSTRG.11373	BAMBI	ENST00000375533	GO:0005109(frizzled binding);GO:0005114(type II transforming growth factor beta receptor binding);GO:0005515(protein binding);GO:0005737(cytoplasm);GO:0005886(plasma membrane);GO:0007179(transforming growth factor beta receptor signaling pathway);GO:0008284(positive regulation of cell population proliferation);GO:0008360(regulation of cell shape);GO:0010718(positive regulation of epithelial to me…	04310(Wnt signaling pathway);04350(TGF-beta signaling pathway)	K10162	NA	BMP and activin membrane bound inhibitor [Source:HGNC Symbol;Acc:HGNC:30251]	protein_coding	8.8333	2.83769	4.81674	0.630036	10.7416	0.642732	3.99895	3.76735	1.27053	1.12361	0.304074	1.08692	0.798628	0.858014	0.620194	3.03229	1.50369	2.18458	6.46484	3.67565	4.74923	75.2499	1.68089	31.915	0.177999	-2.49006	7.33647e-05	0.0128531	down	yes
MSTRG.48083	MACROD2	ENST00000407045;ENST00000402914;ENST00000378058;ENST00000217246	GO:0005634(nucleus);GO:0005654(nucleoplasm);GO:0005730(nucleolus);GO:0006974(cellular response to DNA damage stimulus);GO:0007420(brain development);GO:0009617(response to bacterium);GO:0016787(hydrolase activity);GO:0016798(hydrolase activity, acting on glycosyl bonds);GO:0019213(deacetylase activity);GO:0042278(purine nucleoside metabolic process);GO:0051725(protein de-ADP-ribosylation);GO:0140…	NA	NA	NA	mono-ADP ribosylhydrolase 2 [Source:HGNC Symbol;Acc:HGNC:16126]	protein_coding	0.719676	0.24982	0.56605	0.616976	1.29098	0.221479	0.357847	2.63523	0.611553	0.19619	3.23762	0.231692	2.49709	0.22422	0.217253	7.50475	0.321526	0.197212	0.183252	0.270074	0.497321	0.232921	0.688687	0.118788	4.25902	2.09052	7.37254e-05	0.0128723	up	yes
ENSG00000117155	SSX2IP	ENST00000437941;ENST00000342203;ENST00000603677;ENST00000422026;ENST00000605755	GO:0005515(protein binding);GO:0005634(nucleus);GO:0005737(cytoplasm);GO:0005815(microtubule organizing center);GO:0005856(cytoskeleton);GO:0005912(adherens junction);GO:0007098(centrosome cycle);GO:0007155(cell adhesion);GO:0019904(protein domain specific binding);GO:0030030(cell projection organization);GO:0030054(cell junction);GO:0031252(cell leading edge);GO:0032991(protein-containing comple…	04520(Adherens junction);04520(Adherens junction)	K06085	NA	SSX family member 2 interacting protein [Source:HGNC Symbol;Acc:HGNC:16509]	protein_coding	0.37733	0.276524	0.370867	0.146403	0.311854	0.0720377	0.279495	0.154831	0.365845	0.253764	0.239447	0.357764	0.150027	0.190981	0.179631	0.275856	0.585012	0.590115	0.492531	0.444268	0.312881	0.364216	0.38899	0.447341	0.552037	-0.857164	7.47575e-05	0.0129517	down	no
MSTRG.62304	SGTB	ENST00000381007;ENST00000506816	GO:0005515(protein binding);GO:0005829(cytosol);GO:0006620(posttranslational protein targeting to endoplasmic reticulum membrane);GO:0016020(membrane);GO:0030433(ubiquitin-dependent ERAD pathway);GO:0060090(molecular adaptor activity);GO:0072380(TRC complex);GO:1903646(positive regulation of chaperone-mediated protein folding);GO:1903646(positive regulation of chaperone-mediated protein folding)	NA	NA	NA	small glutamine rich tetratricopeptide repeat containing beta [Source:HGNC Symbol;Acc:HGNC:23567]	protein_coding	1.23989	1.4772	1.07781	0.57439	0.874898	0.462243	0.767159	0.398126	0.807026	0.938933	0.516843	0.596368	0.662263	0.982865	0.474642	0.942742	1.41561	1.17475	1.1391	1.49487	1.38764	1.09065	1.21883	1.96047	0.587828	-0.766535	7.52939e-05	0.0130195	down	no
MSTRG.35260	ITGB3;EFCAB13	ENST00000559488;ENST00000517484;ENST00000331493;ENST00000571680;ENST00000517310;ENST00000519772	GO:0001618(virus receptor activity);GO:0001934(positive regulation of protein phosphorylation);GO:0001938(positive regulation of endothelial cell proliferation);GO:0001968(fibronectin binding);GO:0002020(protease binding);GO:0002576(platelet degranulation);GO:0003756(protein disulfide isomerase activity);GO:0005161(platelet-derived growth factor receptor binding);GO:0005178(integrin binding);GO:0…	04015(Rap1 signaling pathway);04145(Phagosome);04151(PI3K-Akt signaling pathway);04380(Osteoclast differentiation);04510(Focal adhesion);04512(ECM-receptor interaction);04611(Platelet activation);04640(Hematopoietic cell lineage);04810(Regulation of actin cytoskeleton);04919(Thyroid hormone signaling pathway);05163(Human cytomegalovirus infection);05165(Human papillomavirus infection);05168(Herpe…	K06493	NA	integrin subunit beta 3 [Source:HGNC Symbol;Acc:HGNC:6156];EF-hand calcium binding domain 13 [Source:HGNC Symbol;Acc:HGNC:26864]	protein_coding	0.683133	0.69004	1.87504	0.385473	1.21544	0.679729	0.724085	0.525247	0.806778	0.704301	0.61919	1.89436	0.755242	0.405626	0.765114	0.731986	6.55662	1.43186	1.12761	0.681718	1.07322	0.616421	0.768197	11.7771	0.280051	-1.83624	7.59857e-05	0.0130886	down	yes
MSTRG.14570	ADM	ENST00000528655;ENST00000530439;ENST00000524948;ENST00000534464;ENST00000528544;ENST00000278175	GO:0001570(vasculogenesis);GO:0001666(response to hypoxia);GO:0001843(neural tube closure);GO:0002026(regulation of the force of heart contraction);GO:0002031(G protein-coupled receptor internalization);GO:0003073(regulation of systemic arterial blood pressure);GO:0005102(signaling receptor binding);GO:0005179(hormone activity);GO:0005576(extracellular region);GO:0005615(extracellular space);GO:0…	04080(Neuroactive ligand-receptor interaction);04270(Vascular smooth muscle contraction);04270(Vascular smooth muscle contraction)	NA	NA	adrenomedullin [Source:HGNC Symbol;Acc:HGNC:259]	protein_coding	1.58232	0.524682	1.64165	0.783387	0.6571	0.386901	0.419673	0.531148	0.485513	0.753494	0.164549	0.81937	0.0715242	0.582276	0.775501	1.3776	5.46455	3.61261	1.60884	1.63208	5.85897	0.983568	0.649518	0.580408	0.283383	-1.81917	7.6232e-05	0.0131059	down	yes
MSTRG.18306	TPI1	ENST00000535434;ENST00000495834;ENST00000229270;ENST00000488464;ENST00000613953;ENST00000462761;ENST00000493987;ENST00000396705	GO:0003824(catalytic activity);GO:0004807(triose-phosphate isomerase activity);GO:0005515(protein binding);GO:0005615(extracellular space);GO:0005634(nucleus);GO:0005737(cytoplasm);GO:0005829(cytosol);GO:0006094(gluconeogenesis);GO:0006096(glycolytic process);GO:0008929(methylglyoxal synthase activity);GO:0016829(lyase activity);GO:0016853(isomerase activity);GO:0019242(methylglyoxal biosynthetic…	00010(Glycolysis / Gluconeogenesis);00051(Fructose and mannose metabolism);00562(Inositol phosphate metabolism);00562(Inositol phosphate metabolism)	K01803	EC:5.3.1.1	triosephosphate isomerase 1 [Source:HGNC Symbol;Acc:HGNC:12009]	protein_coding	32.4148	30.8673	20.0304	11.7427	21.2424	8.33805	21.7993	10.3281	14.6321	16.9488	23.3515	30.0311	9.36665	21.6509	9.98486	10.1649	61.4922	48.578	36.7236	26.1722	25.1587	35.3021	23.2025	34.8494	0.502428	-0.993012	7.6861e-05	0.0131636	down	no
MSTRG.57168	IL1RAP	ENST00000447382;ENST00000412504;ENST00000317757;ENST00000422485;ENST00000439062;ENST00000453359;ENST00000422940;ENST00000412080;ENST00000422625;ENST00000072516	GO:0002114(interleukin-33 receptor activity);GO:0002376(immune system process);GO:0004908(interleukin-1 receptor activity);GO:0005149(interleukin-1 receptor binding);GO:0005515(protein binding);GO:0005576(extracellular region);GO:0005886(plasma membrane);GO:0005887(integral component of plasma membrane);GO:0006954(inflammatory response);GO:0006955(immune response);GO:0007165(signal transduction);…	04010(MAPK signaling pathway);04060(Cytokine-cytokine receptor interaction);04659(Th17 cell differentiation);04750(Inflammatory mediator regulation of TRP channels);04750(Inflammatory mediator regulation of TRP channels)	K04723	NA	interleukin 1 receptor accessory protein [Source:HGNC Symbol;Acc:HGNC:5995]	protein_coding	1.00585	0.897586	1.04664	0.610241	1.27228	0.304011	0.821711	0.429964	0.805449	0.92666	0.782801	0.916722	0.398654	1.02499	0.262425	0.86549	1.97944	2.37964	2.05548	1.10413	0.94832	1.05374	1.14984	1.25703	0.518605	-0.947291	7.78206e-05	0.0133026	down	no
MSTRG.47942	TMX4	ENST00000246024;ENST00000527925	GO:0005634(nucleus);GO:0005637(nuclear inner membrane);GO:0016020(membrane);GO:0016021(integral component of membrane);GO:0045454(cell redox homeostasis);GO:0055114(oxidation-reduction process);GO:0055114(oxidation-reduction process)	NA	NA	NA	thioredoxin related transmembrane protein 4 [Source:HGNC Symbol;Acc:HGNC:25237]	protein_coding	8.14306	4.59665	7.19905	3.04349	5.51279	2.02192	5.64547	3.57836	4.13677	4.02087	3.52622	3.85659	3.31138	2.77416	3.53325	4.94824	5.18866	7.59825	5.99618	7.75671	6.89683	7.76965	8.75593	9.05119	0.5918	-0.756819	7.97619e-05	0.0134298	down	no
MSTRG.2043	CLDN2	ENST00000336803;ENST00000540876	GO:0005198(structural molecule activity);GO:0005515(protein binding);GO:0005886(plasma membrane);GO:0005911(cell-cell junction);GO:0005923(bicellular tight junction);GO:0007155(cell adhesion);GO:0016020(membrane);GO:0016021(integral component of membrane);GO:0016338(calcium-independent cell-cell adhesion via plasma membrane cell-adhesion molecules);GO:0030054(cell junction);GO:0042802(identical p…	04514(Cell adhesion molecules (CAMs));04530(Tight junction);04670(Leukocyte transendothelial migration);05160(Hepatitis C);05160(Hepatitis C)	K06087	NA	claudin 2 [Source:HGNC Symbol;Acc:HGNC:2041]	protein_coding	1.95121	2.85185	0.22949	0.135115	3.01935	0.987704	5.48967	1.41499	0.991072	0.729733	0.850268	1.37123	0.0908753	0.736708	0.183397	0.895252	0.353873	0.509867	18.6554	0.200011	3.30364	19.3954	2.83302	33.6117	0.139025	-2.84658	8.0409e-05	0.0135134	down	yes
MSTRG.54952	TMEM45A	ENST00000323523;ENST00000449609;ENST00000403410	GO:0005515(protein binding);GO:0016020(membrane);GO:0016021(integral component of membrane);GO:0016021(integral component of membrane)	NA	NA	NA	transmembrane protein 45A [Source:HGNC Symbol;Acc:HGNC:25480]	protein_coding	0.475123	0.527729	0.852766	0.375618	0.641352	0.132218	0.503027	0.119588	0.532479	0.34256	0.146042	0.369469	0.322553	0.291759	0.194391	0.435539	1.55568	1.22694	0.78796	0.775	1.26092	1.4537	0.367575	0.276161	0.406429	-1.29892	8.23933e-05	0.0137198	down	yes
MSTRG.434	PTCHD1	ENST00000379361	GO:0003674(molecular_function);GO:0005886(plasma membrane);GO:0007224(smoothened signaling pathway);GO:0007268(chemical synaptic transmission);GO:0007614(short-term memory);GO:0007616(long-term memory);GO:0016020(membrane);GO:0016021(integral component of membrane);GO:0021794(thalamus development);GO:0035176(social behavior);GO:0045202(synapse);GO:0050890(cognition);GO:0098976(excitatory chemical…	NA	NA	NA	patched domain containing 1 [Source:HGNC Symbol;Acc:HGNC:26392]	protein_coding	0.94408	0.369582	0.309425	0.278581	0.168718	2.48585	0.094485	0.422021	0.205528	0.227647	0.134007	0.056293	0.290327	0.040701	0.296527	0.324459	0.111902	0.024186	0.086888	0.38407	0.096371	0.057332	0.065032	0.007152	3.99086	1.9967	8.37167e-05	0.0138872	up	yes
MSTRG.14683	ARNTL	ENST00000529388;ENST00000389707;ENST00000403482;ENST00000534544;ENST00000401424;ENST00000531665;ENST00000529050;ENST00000403510;ENST00000673817;ENST00000403290	GO:0000790(nuclear chromatin);GO:0000976(transcription regulatory region sequence-specific DNA binding);GO:0000978(RNA polymerase II cis-regulatory region sequence-specific DNA binding);GO:0000981(DNA-binding transcription factor activity, RNA polymerase II-specific);GO:0001228(DNA-binding transcription activator activity, RNA polymerase II-specific);GO:0003677(DNA binding);GO:0003700(DNA-binding…	04710(Circadian rhythm);04728(Dopaminergic synapse);04728(Dopaminergic synapse)	NA	NA	aryl hydrocarbon receptor nuclear translocator like [Source:HGNC Symbol;Acc:HGNC:701]	protein_coding	1.81969	1.25634	1.1222	1.14205	1.77646	1.33329	1.7501	1.26036	1.99173	2.79631	0.654749	0.690164	1.03993	0.723408	1.77335	3.07203	0.474932	0.776896	0.870061	1.48119	0.811743	0.611214	1.17325	0.36118	1.84455	0.883266	8.39309e-05	0.0138971	up	no
MSTRG.25331	CCDC198	ENST00000216445;ENST00000534126;ENST00000422976;ENST00000526336;ENST00000524996	GO:0005515(protein binding);GO:0005515(protein binding)	NA	NA	NA	coiled-coil domain containing 198 [Source:HGNC Symbol;Acc:HGNC:20189]	protein_coding	0.275818	0.0273264	0.0625377	0.0334469	0.341476	0.0319979	0.22026	0.0878048	0.0666887	0.156927	0.464057	0.620354	0.0645789	0.113447	0.0502649	0.0658098	0.195638	0.10854	0.701198	0.0838972	0.116919	4.83942	0.0609153	1.99711	0.16553	-2.59483	8.65548e-05	0.0142265	down	yes
MSTRG.34613	SLFN5	ENST00000542451;ENST00000299977;ENST00000592325	GO:0000166(nucleotide binding);GO:0005524(ATP binding);GO:0005634(nucleus);GO:0030154(cell differentiation);GO:0030154(cell differentiation)	NA	NA	NA	schlafen family member 5 [Source:HGNC Symbol;Acc:HGNC:28286]	protein_coding	5.5759	3.51857	4.27033	1.58652	4.59728	2.7101	3.26445	1.46642	4.30659	3.59281	1.73344	2.01798	1.81074	3.76331	1.76085	3.1446	5.75852	5.82768	4.86739	5.66521	4.92774	4.79336	4.03194	8.23045	0.556886	-0.844547	8.73248e-05	0.0143007	down	no
MSTRG.28038	DUOXA1;DUOX2	ENST00000430224;ENST00000558422;ENST00000558851;ENST00000603300;ENST00000389039;ENST00000560572;ENST00000558996;ENST00000559644;ENST00000267803;ENST00000559988;ENST00000558326;ENST00000558377;ENST00000559014;ENST00000559226;ENST00000613425	GO:0005789(endoplasmic reticulum membrane);GO:0005886(plasma membrane);GO:0008104(protein localization);GO:0010729(positive regulation of hydrogen peroxide biosynthetic process);GO:0015031(protein transport);GO:0016020(membrane);GO:0016021(integral component of membrane);GO:0034613(cellular protein localization);GO:0042743(hydrogen peroxide metabolic process);GO:0045666(positive regulation of neu…	04918(Thyroid hormone synthesis);04918(Thyroid hormone synthesis)	K17233;K13411	1.11.1.-;EC:1.6.3.1	dual oxidase maturation factor 1 [Source:HGNC Symbol;Acc:HGNC:26507];dual oxidase 2 [Source:HGNC Symbol;Acc:HGNC:13273]	protein_coding	0.74548	1.99531	1.30503	3.92043	1.26643	1.19079	1.29935	1.70071	1.01782	1.48721	1.72344	0.410524	2.50898	1.75947	1.38286	1.40043	0.943795	0.0798266	0.258284	0.559943	0.695207	1.19099	0.177488	1.0798	2.51881	1.33274	9.44015e-05	0.0152646	up	yes
ENSG00000277586	NEFL	ENST00000610854	GO:0000165(MAPK cascade);GO:0000226(microtubule cytoskeleton organization);GO:0005200(structural constituent of cytoskeleton);GO:0005515(protein binding);GO:0005737(cytoplasm);GO:0005829(cytosol);GO:0005856(cytoskeleton);GO:0005882(intermediate filament);GO:0005883(neurofilament);GO:0008022(protein C-terminus binding);GO:0008089(anterograde axonal transport);GO:0008090(retrograde axonal transport…	05014(Amyotrophic lateral sclerosis (ALS))	K04572	NA	neurofilament light [Source:HGNC Symbol;Acc:HGNC:7739]	protein_coding	0	0	0.0454936	0.00922555	0.0202145	0.0232882	0.0205287	0	0	0.0413843	0	0	0	0	0.0129396	0.0370025	0.141033	0.173875	0.0297504	0.0751152	0.0983796	0.0408985	0.0411166	0.5581	0.0906857	-3.46298	9.45736e-05	0.015265	down	yes
MSTRG.60768	C4orf46	ENST00000379205;ENST00000508457	GO:0005515(protein binding);GO:0005737(cytoplasm);GO:0005737(cytoplasm)	NA	NA	NA	chromosome 4 open reading frame 46 [Source:HGNC Symbol;Acc:HGNC:27320]	protein_coding	0.794163	0.672949	0.520755	0.296228	0.618462	0.385066	0.550366	0.281707	0.546827	0.334445	0.426949	0.565646	0.252012	0.398183	0.187807	0.364133	1.26984	1.32673	0.588036	0.962895	0.629996	1.19596	0.601808	0.475174	0.510301	-0.970578	9.82956e-05	0.0157844	down	no
MSTRG.9137	PPFIA4	ENST00000600426;ENST00000272198;ENST00000367240;ENST00000447715;ENST00000599514;ENST00000295706	GO:0005515(protein binding);GO:0005737(cytoplasm);GO:0005829(cytosol);GO:0007269(neurotransmitter secretion);GO:0009986(cell surface);GO:0014047(glutamate secretion);GO:0045202(synapse);GO:0048786(presynaptic active zone);GO:0050808(synapse organization);GO:0050808(synapse organization)	NA	NA	NA	PTPRF interacting protein alpha 4 [Source:HGNC Symbol;Acc:HGNC:9248]	protein_coding	0.433515	0.175854	0.209482	0.165392	0.256595	0.378873	0.536059	0.129916	0.257096	0.237012	0.0380667	0.865772	0.278342	0.278591	0.0926759	0.213421	2.06713	0.993311	0.465083	0.240707	0.558665	1.11307	0.230862	1.85002	0.302351	-1.7257	9.83194e-05	0.0157844	down	yes
MSTRG.35396	HOXB7	ENST00000239165	GO:0000790(nuclear chromatin);GO:0000978(RNA polymerase II cis-regulatory region sequence-specific DNA binding);GO:0000981(DNA-binding transcription factor activity, RNA polymerase II-specific);GO:0001228(DNA-binding transcription activator activity, RNA polymerase II-specific);GO:0003677(DNA binding);GO:0003700(DNA-binding transcription factor activity);GO:0005515(protein binding);GO:0005634(nuc…	NA	K09307	NA	homeobox B7 [Source:HGNC Symbol;Acc:HGNC:5118]	protein_coding	0.102777	0.18096	0.0842887	0	0.111008	0.0660983	0.270323	0.0743634	0.149587	0.0597897	0.0645643	0.27864	0.0668713	0.189248	0.159492	0.0368301	0.156691	0.207334	0.342218	0.185071	0.187659	4.31872	0.15353	0.0290405	0.169781	-2.55826	9.87386e-05	0.0158234	down	yes
MSTRG.51776	SLC5A1	ENST00000266088;ENST00000543737	GO:0000017(alpha-glucoside transport);GO:0005354(galactose transmembrane transporter activity);GO:0005355(glucose transmembrane transporter activity);GO:0005367(myo-inositol:sodium symporter activity);GO:0005372(water transmembrane transporter activity);GO:0005412(glucose:sodium symporter activity);GO:0005515(protein binding);GO:0005769(early endosome);GO:0005886(plasma membrane);GO:0005887(integ…	04973(Carbohydrate digestion and absorption);04976(Bile secretion);04978(Mineral absorption);04978(Mineral absorption)	K14158	NA	solute carrier family 5 member 1 [Source:HGNC Symbol;Acc:HGNC:11036]	protein_coding	0.0785949	0.0834174	0.536428	0.327904	0.0824991	0.32823	0.178803	0.0527031	0.698214	0.0106968	0.0469839	0.0427139	0.259621	0.0112864	0.0100339	0	0.0972952	3.96653	2.57612	0.42458	0.639586	6.7535	0.0883302	0.143838	0.0935388	-3.41829	0.000101322	0.0160674	down	yes
MSTRG.20339	XPOT	ENST00000400935;ENST00000332707;ENST00000540203	GO:0000049(tRNA binding);GO:0003723(RNA binding);GO:0005515(protein binding);GO:0005634(nucleus);GO:0005643(nuclear pore);GO:0005654(nucleoplasm);GO:0005737(cytoplasm);GO:0005829(cytosol);GO:0006409(tRNA export from nucleus);GO:0006886(intracellular protein transport);GO:0008536(Ran GTPase binding);GO:0016363(nuclear matrix);GO:0071528(tRNA re-export from nucleus);GO:0071528(tRNA re-export from n…	03013(RNA transport);03013(RNA transport)	K14288	NA	exportin for tRNA [Source:HGNC Symbol;Acc:HGNC:12826]	protein_coding	4.28556	4.26184	3.8814	1.54555	3.1851	1.5783	2.19607	1.69441	2.63497	2.23002	2.84983	2.52162	2.09895	2.62327	1.75061	1.93946	4.66233	4.93113	3.29998	3.96881	4.04081	5.28473	3.61407	3.68833	0.616255	-0.698401	0.000104931	0.0165789	down	no
MSTRG.32056	CKLF;CMTM1;CKLF-CMTM1;CMTM2	ENST00000351137;ENST00000264001;ENST00000328020;ENST00000345436;ENST00000417030;ENST00000532838;ENST00000268595	GO:0005125(cytokine activity);GO:0005515(protein binding);GO:0005576(extracellular region);GO:0005615(extracellular space);GO:0006935(chemotaxis);GO:0007165(signal transduction);GO:0008009(chemokine activity);GO:0016020(membrane);GO:0016021(integral component of membrane);GO:0030593(neutrophil chemotaxis);GO:0030595(leukocyte chemotaxis);GO:0032940(secretion by cell);GO:0048246(macrophage chemota…	NA	NA	NA	chemokine like factor [Source:HGNC Symbol;Acc:HGNC:13253];CKLF like MARVEL transmembrane domain containing 1 [Source:HGNC Symbol;Acc:HGNC:19172];CKLF-CMTM1 readthrough [Source:HGNC Symbol;Acc:HGNC:39977];CKLF like MARVEL transmembrane domain containing 2 [Source:HGNC Symbol;Acc:HGNC:19173]	protein_coding	1.58446	1.43628	1.01801	0.6909	0.962761	0.53874	0.920187	0.965159	1.0366	1.84716	1.83149	1.45363	0.49905	0.934595	0.51947	1.20695	3.51305	1.43864	1.80464	1.81898	1.45219	2.1365	1.91271	2.86647	0.514822	-0.957854	0.000106204	0.0167339	down	no
MSTRG.47489	COL6A3	ENST00000491233;ENST00000409809;ENST00000472056;ENST00000392003;ENST00000347401;ENST00000353578;ENST00000433762;ENST00000392004;ENST00000295550	GO:0004867(serine-type endopeptidase inhibitor activity);GO:0005515(protein binding);GO:0005576(extracellular region);GO:0005581(collagen trimer);GO:0005589(collagen type VI trimer);GO:0005615(extracellular space);GO:0005788(endoplasmic reticulum lumen);GO:0007155(cell adhesion);GO:0007517(muscle organ development);GO:0010466(negative regulation of peptidase activity);GO:0010951(negative regulati…	04151(PI3K-Akt signaling pathway);04510(Focal adhesion);04512(ECM-receptor interaction);04974(Protein digestion and absorption);05165(Human papillomavirus infection);05165(Human papillomavirus infection)	NA	NA	collagen type VI alpha 3 chain [Source:HGNC Symbol;Acc:HGNC:2213]	protein_coding	26.1511	31.9399	15.0285	12.8739	19.5858	12.4072	16.4076	7.95742	21.8875	14.4143	5.63568	26.1288	7.31844	25.9202	11.732	16.0435	33.0315	102.05	57.2659	49.4122	64.7071	17.1111	24.8072	6.53966	0.382379	-1.38692	0.000107454	0.0168185	down	yes
MSTRG.1919	TCEAL8	ENST00000372685;ENST00000451678;ENST00000360000	GO:0005515(protein binding);GO:0005634(nucleus);GO:0050699(WW domain binding);GO:0050699(WW domain binding)	NA	NA	NA	transcription elongation factor A like 8 [Source:HGNC Symbol;Acc:HGNC:28683]	protein_coding	6.83758	4.50133	5.63451	1.85086	5.02833	1.56265	4.40819	1.61872	3.04084	3.08338	2.74719	2.3834	1.92598	2.52493	1.32506	2.64691	6.62556	7.568	3.63617	6.21782	3.67583	9.47571	3.62897	13.878	0.467223	-1.09782	0.000107572	0.0168185	down	yes
MSTRG.9872	PARP1	ENST00000366794;ENST00000366790;ENST00000366792	GO:0000122(negative regulation of transcription by RNA polymerase II);GO:0000715(nucleotide-excision repair, DNA damage recognition);GO:0000717(nucleotide-excision repair, DNA duplex unwinding);GO:0000723(telomere maintenance);GO:0000724(double-strand break repair via homologous recombination);GO:0000784(nuclear chromosome, telomeric region);GO:0000977(RNA polymerase II regulatory region sequence…	03410(Base excision repair);04064(NF-kappa B signaling pathway);04210(Apoptosis);04217(Necroptosis);04217(Necroptosis)	NA	NA	poly(ADP-ribose) polymerase 1 [Source:HGNC Symbol;Acc:HGNC:270]	protein_coding	5.10254	5.11742	5.6385	2.48664	3.87593	3.29844	4.65571	2.36708	2.97887	5.2485	3.58941	3.47417	2.46026	5.6924	2.783	3.09622	5.60159	7.11672	5.1462	5.20028	6.69933	8.37079	4.62628	7.19864	0.619148	-0.691644	0.000112685	0.017496	down	no
MSTRG.3464	CASZ1	ENST00000377022;ENST00000344008;ENST00000447850	GO:0003676(nucleic acid binding);GO:0003677(DNA binding);GO:0005634(nucleus);GO:0005654(nucleoplasm);GO:0005829(cytosol);GO:0006355(regulation of transcription, DNA-templated);GO:0007275(multicellular organism development);GO:0043231(intracellular membrane-bounded organelle);GO:0045664(regulation of neuron differentiation);GO:0045893(positive regulation of transcription, DNA-templated);GO:0046872…	NA	NA	NA	castor zinc finger 1 [Source:HGNC Symbol;Acc:HGNC:26002]	protein_coding	0.941609	1.0868	1.61871	1.8073	1.70215	1.29528	1.58286	1.59912	1.75379	0.977849	1.42676	1.37306	1.96354	2.36873	1.4317	1.20464	0.665009	0.788483	1.14067	1.11815	0.730183	0.847098	1.86871	0.59463	1.55644	0.638249	0.000116777	0.0179208	up	no
MSTRG.16469	NDUFC2;NDUFC2-KCTD14;KCTD14	ENST00000534029;ENST00000281031;ENST00000530054;ENST00000528164;ENST00000533144;ENST00000353172	GO:0005737(cytoplasm);GO:0005739(mitochondrion);GO:0005743(mitochondrial inner membrane);GO:0005747(mitochondrial respiratory chain complex I);GO:0005886(plasma membrane);GO:0006120(mitochondrial electron transport, NADH to ubiquinone);GO:0008137(NADH dehydrogenase (ubiquinone) activity);GO:0016020(membrane);GO:0016021(integral component of membrane);GO:0032981(mitochondrial respiratory chain com…	00190(Oxidative phosphorylation);04714(Thermogenesis);04723(Retrograde endocannabinoid signaling);04932(Non-alcoholic fatty liver disease (NAFLD));05010(Alzheimer disease);05012(Parkinson disease);05016(Huntington disease);05016(Huntington disease)	K03968;K21917	NA	NADH:ubiquinone oxidoreductase subunit C2 [Source:HGNC Symbol;Acc:HGNC:7706];NDUFC2-KCTD14 readthrough [Source:HGNC Symbol;Acc:HGNC:42956];potassium channel tetramerization domain containing 14 [Source:HGNC Symbol;Acc:HGNC:23295]	protein_coding	3.60991	5.10183	5.72388	1.60277	3.94335	1.89291	3.43894	2.01028	2.70232	3.48256	4.62059	5.68747	1.70872	3.56129	2.27066	3.08049	4.39762	71.0739	4.57678	3.34912	2.20336	5.40131	3.03691	4.14299	0.27723	-1.85085	0.000116819	0.0179208	down	yes
MSTRG.7411	ANP32E	ENST00000616917;ENST00000534437;ENST00000436748;ENST00000533654;ENST00000583931;ENST00000629042;ENST00000532744	GO:0000812(Swr1 complex);GO:0005515(protein binding);GO:0005634(nucleus);GO:0005737(cytoplasm);GO:0006325(chromatin organization);GO:0019212(phosphatase inhibitor activity);GO:0031410(cytoplasmic vesicle);GO:0042393(histone binding);GO:0042981(regulation of apoptotic process);GO:0043086(negative regulation of catalytic activity);GO:0043486(histone exchange);GO:0043486(histone exchange)	NA	K18648	NA	acidic nuclear phosphoprotein 32 family member E [Source:HGNC Symbol;Acc:HGNC:16673]	protein_coding	3.57439	5.03242	3.98311	1.18134	3.3161	1.28547	2.73898	1.29786	3.60708	2.96554	1.50197	1.77224	1.72096	4.88708	1.20321	1.62891	5.87852	6.8214	3.53287	3.99836	3.88563	8.24843	2.42789	9.74207	0.468132	-1.09501	0.000118402	0.0180465	down	yes
MSTRG.9261	NUCKS1	ENST00000367142	GO:0000724(double-strand break repair via homologous recombination);GO:0000785(chromatin);GO:0000790(nuclear chromatin);GO:0001228(DNA-binding transcription activator activity, RNA polymerase II-specific);GO:0001678(cellular glucose homeostasis);GO:0003682(chromatin binding);GO:0003690(double-stranded DNA binding);GO:0003697(single-stranded DNA binding);GO:0003723(RNA binding);GO:0005634(nucleus)…	NA	NA	NA	nuclear casein kinase and cyclin dependent kinase substrate 1 [Source:HGNC Symbol;Acc:HGNC:29923]	protein_coding	9.80937	11.7025	14.1346	4.74393	10.2936	3.55027	8.31402	4.60339	8.80717	8.66224	8.68782	8.42234	4.48506	12.7393	3.9443	6.17103	10.5707	16.4071	11.3121	13.7391	12.8125	17.8016	10.1318	23.5019	0.555016	-0.8494	0.000119128	0.0180614	down	no
MSTRG.56324	SUCNR1	ENST00000362032	GO:0002001(renin secretion into blood stream);GO:0002281(macrophage activation involved in immune response);GO:0004930(G protein-coupled receptor activity);GO:0005515(protein binding);GO:0005886(plasma membrane);GO:0007165(signal transduction);GO:0007186(G protein-coupled receptor signaling pathway);GO:0016020(membrane);GO:0016021(integral component of membrane);GO:0032611(interleukin-1 beta prod…	04024(cAMP signaling pathway)	K10042	NA	succinate receptor 1 [Source:HGNC Symbol;Acc:HGNC:4542]	protein_coding	1.32421	1.16885	0.616206	0.140489	0.652971	0.279307	0.179458	0.111183	0.137415	0.125755	0.391286	0.153362	0.226338	0.267897	0.094089	0.579113	1.29644	0.404709	2.7129	0.701553	0.922616	1.00505	0.520534	3.70685	0.28605	-1.80566	0.000119144	0.0180614	down	yes
MSTRG.7295	ITGA10	ENST00000369304;ENST00000539363	GO:0005518(collagen binding);GO:0005886(plasma membrane);GO:0007155(cell adhesion);GO:0007160(cell-matrix adhesion);GO:0007229(integrin-mediated signaling pathway);GO:0008305(integrin complex);GO:0016020(membrane);GO:0016021(integral component of membrane);GO:0030198(extracellular matrix organization);GO:0034680(integrin alpha10-beta1 complex);GO:0046872(metal ion binding);GO:0098639(collagen bin…	04151(PI3K-Akt signaling pathway);04510(Focal adhesion);04512(ECM-receptor interaction);04810(Regulation of actin cytoskeleton);05165(Human papillomavirus infection);05410(Hypertrophic cardiomyopathy (HCM));05412(Arrhythmogenic right ventricular cardiomyopathy (ARVC));05414(Dilated cardiomyopathy (DCM));05414(Dilated cardiomyopathy (DCM))	K06586	NA	integrin subunit alpha 10 [Source:HGNC Symbol;Acc:HGNC:6135]	protein_coding	0.844987	1.5819	1.68303	6.55242	3.14061	1.99727	1.70771	1.05148	0.784053	1.41264	4.06386	3.10524	2.63667	1.17473	2.21235	3.1313	1.11327	0.62485	1.45333	0.947875	2.04072	0.467187	1.08052	0.286879	2.31328	1.20994	0.000120051	0.0181681	up	yes
MSTRG.54635	GXYLT2;PPP4R2	ENST00000389617;ENST00000356692;ENST00000488810;ENST00000498315;ENST00000491839;ENST00000460360;ENST00000495566;ENST00000476505	GO:0016020(membrane);GO:0016021(integral component of membrane);GO:0016266(O-glycan processing);GO:0016740(transferase activity);GO:0016757(transferase activity, transferring glycosyl groups);GO:0035252(UDP-xylosyltransferase activity);GO:0005515(protein binding);GO:0005634(nucleus);GO:0005654(nucleoplasm);GO:0005737(cytoplasm);GO:0005813(centrosome);GO:0005815(microtubule organizing center);GO:0…	00514(Other types of O-glycan biosynthesis);00514(Other types of O-glycan biosynthesis)	K13676;K15425	EC:2.4.2.-	glucoside xylosyltransferase 2 [Source:HGNC Symbol;Acc:HGNC:33383];protein phosphatase 4 regulatory subunit 2 [Source:HGNC Symbol;Acc:HGNC:18296]	protein_coding	3.53196	2.60422	3.49598	1.61476	2.89169	1.28147	2.41773	1.34007	2.57889	2.00379	1.59853	1.65388	1.32159	3.1645	1.08697	2.09197	3.11518	7.87552	3.4879	5.29587	4.38919	3.06091	2.43131	2.54115	0.538528	-0.892907	0.000123362	0.0185131	down	no
MSTRG.8349	PRRX1	ENST00000239461;ENST00000367760;ENST00000497230	GO:0000122(negative regulation of transcription by RNA polymerase II);GO:0000790(nuclear chromatin);GO:0000978(RNA polymerase II cis-regulatory region sequence-specific DNA binding);GO:0000981(DNA-binding transcription factor activity, RNA polymerase II-specific);GO:0001102(RNA polymerase II activating transcription factor binding);GO:0001227(DNA-binding transcription repressor activity, RNA poly…	NA	K09329	NA	paired related homeobox 1 [Source:HGNC Symbol;Acc:HGNC:9142]	protein_coding	1.30878	1.94866	3.13601	0.530053	2.03388	0.483024	0.724522	0.448181	1.52532	1.50651	0.369571	1.29876	0.64309	1.78209	0.416876	1.28123	1.69545	6.33085	3.64108	4.42192	5.94829	1.57377	1.57931	0.867533	0.372945	-1.42296	0.000124194	0.0185675	down	yes
MSTRG.53980	CACNA2D2	ENST00000423994;ENST00000429770;ENST00000479441;ENST00000360963;ENST00000424201	GO:0005244(voltage-gated ion channel activity);GO:0005245(voltage-gated calcium channel activity);GO:0005262(calcium channel activity);GO:0005886(plasma membrane);GO:0005891(voltage-gated calcium channel complex);GO:0006811(ion transport);GO:0006816(calcium ion transport);GO:0007528(neuromuscular junction development);GO:0016020(membrane);GO:0016021(integral component of membrane);GO:0034765(regu…	04010(MAPK signaling pathway);04260(Cardiac muscle contraction);04261(Adrenergic signaling in cardiomyocytes);04921(Oxytocin signaling pathway);05410(Hypertrophic cardiomyopathy (HCM));05412(Arrhythmogenic right ventricular cardiomyopathy (ARVC));05414(Dilated cardiomyopathy (DCM));05414(Dilated cardiomyopathy (DCM))	K04859	NA	calcium voltage-gated channel auxiliary subunit alpha2delta 2 [Source:HGNC Symbol;Acc:HGNC:1400]	protein_coding	4.50924	3.02352	4.10197	5.27281	4.17648	1.37337	1.92538	3.52814	4.58996	4.55936	0.253746	0.0259928	3.18876	5.57194	1.7216	3.06985	0.538771	0.876349	0.418872	2.36646	0.74025	0.323745	2.14882	0.510389	3.2114	1.6832	0.000124204	0.0185675	up	yes
MSTRG.19791	RACGAP1	ENST00000312377;ENST00000550149;ENST00000548247;ENST00000551876;ENST00000454520;ENST00000548824;ENST00000552310;ENST00000546723;ENST00000546764;ENST00000549342;ENST00000548644;ENST00000551145;ENST00000552157;ENST00000552004;ENST00000547905;ENST00000427314;ENST00000551016;ENST00000552921;ENST00000546786	GO:0000281(mitotic cytokinesis);GO:0000915(actomyosin contractile ring assembly);GO:0001669(acrosomal vesicle);GO:0005096(GTPase activator activity);GO:0005515(protein binding);GO:0005547(phosphatidylinositol-3,4,5-trisphosphate binding);GO:0005634(nucleus);GO:0005654(nucleoplasm);GO:0005737(cytoplasm);GO:0005819(spindle);GO:0005829(cytosol);GO:0005856(cytoskeleton);GO:0005874(microtubule);GO:000…	NA	K16733	NA	Rac GTPase activating protein 1 [Source:HGNC Symbol;Acc:HGNC:9804]	protein_coding	1.88047	1.4939	1.05817	0.736874	0.828125	0.418599	1.01357	0.543306	0.887938	0.941224	0.867465	0.600736	0.659399	0.811174	0.719336	0.961189	2.02583	2.10249	1.21178	1.25986	1.00007	2.64451	1.45925	1.54125	0.544411	-0.877233	0.000124345	0.0185675	down	no
MSTRG.62034	NDUFS4	ENST00000506765;ENST00000296684	GO:0001932(regulation of protein phosphorylation);GO:0005739(mitochondrion);GO:0005743(mitochondrial inner membrane);GO:0005747(mitochondrial respiratory chain complex I);GO:0006120(mitochondrial electron transport, NADH to ubiquinone);GO:0007420(brain development);GO:0008137(NADH dehydrogenase (ubiquinone) activity);GO:0016020(membrane);GO:0016651(oxidoreductase activity, acting on NAD(P)H);GO:0…	00190(Oxidative phosphorylation);04714(Thermogenesis);04723(Retrograde endocannabinoid signaling);04932(Non-alcoholic fatty liver disease (NAFLD));05010(Alzheimer disease);05012(Parkinson disease);05016(Huntington disease);05016(Huntington disease)	K03937	NA	NADH:ubiquinone oxidoreductase subunit S4 [Source:HGNC Symbol;Acc:HGNC:7711]	protein_coding	5.43246	5.18582	6.35749	2.20981	6.45665	1.32114	3.54398	2.3652	3.32711	3.69434	4.35391	4.44583	2.7398	4.66829	2.14419	3.34219	9.99119	5.70878	6.47819	4.48278	5.63004	9.45618	4.68136	11.2234	0.534138	-0.904715	0.000127719	0.0189775	down	no
MSTRG.73794	PTPRN2	ENST00000389413;ENST00000389416;ENST00000409483;ENST00000404321;ENST00000648371;ENST00000389418	GO:0004721(phosphoprotein phosphatase activity);GO:0004725(protein tyrosine phosphatase activity);GO:0005001(transmembrane receptor protein tyrosine phosphatase activity);GO:0005737(cytoplasm);GO:0005788(endoplasmic reticulum lumen);GO:0005886(plasma membrane);GO:0005887(integral component of plasma membrane);GO:0006470(protein dephosphorylation);GO:0006629(lipid metabolic process);GO:0007269(neu…	04940(Type I diabetes mellitus);04940(Type I diabetes mellitus)	K07817	EC:3.1.3.48	protein tyrosine phosphatase receptor type N2 [Source:HGNC Symbol;Acc:HGNC:9677]	protein_coding	1.18272	3.58357	1.49275	0.749649	1.09088	0.87517	0.415154	1.71698	0.336054	2.2194	5.42257	5.70468	2.81981	0.272826	1.0978	1.41788	0.929764	0.248749	0.450623	0.538145	1.00376	1.19803	0.500755	0.277205	2.95295	1.56216	0.000127774	0.0189775	up	yes
MSTRG.20250	CDK4	ENST00000257904;ENST00000312990;ENST00000547281;ENST00000547853;ENST00000552388;ENST00000546489;ENST00000552254;ENST00000552862	GO:0000079(regulation of cyclin-dependent protein serine/threonine kinase activity);GO:0000082(G1/S transition of mitotic cell cycle);GO:0000166(nucleotide binding);GO:0000307(cyclin-dependent protein kinase holoenzyme complex);GO:0000785(chromatin);GO:0002088(lens development in camera-type eye);GO:0004672(protein kinase activity);GO:0004674(protein serine/threonine kinase activity);GO:0004693(c…	01522(Endocrine resistance);04110(Cell cycle);04115(p53 signaling pathway);04151(PI3K-Akt signaling pathway);04218(Cellular senescence);04530(Tight junction);04660(T cell receptor signaling pathway);04933(AGE-RAGE signaling pathway in diabetic complications);04934(Cushing syndrome);05160(Hepatitis C);05162(Measles);05163(Human cytomegalovirus infection);05165(Human papillomavirus infection);05166…	NA	NA	cyclin dependent kinase 4 [Source:HGNC Symbol;Acc:HGNC:1773]	protein_coding	10.8702	8.41809	5.65608	2.93365	6.2123	3.20423	5.60976	4.00424	5.64463	4.63669	5.53285	6.85087	3.2655	7.82	4.18564	4.74215	9.2611	51.3554	7.66881	8.76704	8.95064	9.97271	6.80207	6.22545	0.410937	-1.28301	0.000128859	0.0190828	down	yes
MSTRG.35001	FKBP10	ENST00000321562;ENST00000585922;ENST00000455106;ENST00000585664	GO:0000413(protein peptidyl-prolyl isomerization);GO:0001701(in utero embryonic development);GO:0003755(peptidyl-prolyl cis-trans isomerase activity);GO:0005509(calcium ion binding);GO:0005528(FK506 binding);GO:0005758(mitochondrial intermembrane space);GO:0005783(endoplasmic reticulum);GO:0005788(endoplasmic reticulum lumen);GO:0016020(membrane);GO:0016853(isomerase activity);GO:0017185(peptidyl…	NA	K09575	EC:5.2.1.8	FKBP prolyl isomerase 10 [Source:HGNC Symbol;Acc:HGNC:18169]	protein_coding	5.15455	4.35776	3.57321	3.44999	4.43101	2.21634	3.99735	2.4943	6.44308	2.84378	1.47347	4.6025	2.66268	4.29133	2.6988	4.01	27.5238	15.8319	9.09244	6.56513	9.41826	2.85681	5.2724	1.25253	0.377186	-1.40665	0.000132687	0.0195209	down	yes
MSTRG.9459	TATDN3	ENST00000606486;ENST00000526641;ENST00000366974;ENST00000488246;ENST00000366973;ENST00000526997;ENST00000531963;ENST00000530441;ENST00000530399;ENST00000532324	GO:0004518(nuclease activity);GO:0005634(nucleus);GO:0016787(hydrolase activity);GO:0016788(hydrolase activity, acting on ester bonds);GO:0046872(metal ion binding);GO:0090305(nucleic acid phosphodiester bond hydrolysis);GO:0090305(nucleic acid phosphodiester bond hydrolysis)	NA	K03424	EC:3.1.21.-	TatD DNase domain containing 3 [Source:HGNC Symbol;Acc:HGNC:27010]	protein_coding	1.02892	0.722741	0.535367	0.309476	0.441876	0.18875	0.655993	0.492353	0.668171	0.478228	0.50121	0.382288	0.288604	0.532171	0.211607	0.429142	0.8536	0.617749	0.898092	1.14237	0.710184	0.759227	1.01418	1.22268	0.544943	-0.875822	0.000135132	0.0198156	down	no
MSTRG.806	ZNF41	ENST00000377065;ENST00000313116;ENST00000432977	GO:0003676(nucleic acid binding);GO:0003677(DNA binding);GO:0005515(protein binding);GO:0005634(nucleus);GO:0006355(regulation of transcription, DNA-templated);GO:0046872(metal ion binding);GO:0046872(metal ion binding)	05168(Herpes simplex virus 1 infection);05168(Herpes simplex virus 1 infection)	K09228	NA	zinc finger protein 41 [Source:HGNC Symbol;Acc:HGNC:13107]	protein_coding	0.44284	0.420128	1.00684	0.357882	1.03606	0.354986	1.05739	0.52776	0.69487	0.569898	0.190813	0.315449	0.290786	1.10804	0.529411	1.11879	1.34008	1.09382	1.32253	1.4177	1.41965	2.19183	1.04077	1.02343	0.461849	-1.11451	0.000140861	0.0203563	down	yes
MSTRG.80022	LCN6;LCN10	ENST00000476567;ENST00000474369;ENST00000341206;ENST00000497771;ENST00000527229	GO:0005576(extracellular region);GO:0007338(single fertilization);GO:0036094(small molecule binding);GO:0036094(small molecule binding)	NA	NA	NA	lipocalin 6 [Source:HGNC Symbol;Acc:HGNC:17337];lipocalin 10 [Source:HGNC Symbol;Acc:HGNC:20892]	protein_coding	0.543129	0.234307	0.734615	1.01495	0.44322	2.58241	0.523545	0.800689	0.233741	0.846943	0.0814576	0.231486	1.49118	0.343762	0.597107	0.611541	0.11634	0.0534712	0.289642	0.143556	0.792916	0.109177	0.159646	0.221261	2.99947	1.58471	0.000141736	0.020417	up	yes
MSTRG.28095	FBN1	ENST00000316623;ENST00000560355	GO:0001501(skeletal system development);GO:0001527(microfibril);GO:0001656(metanephros development);GO:0001822(kidney development);GO:0005178(integrin binding);GO:0005179(hormone activity);GO:0005201(extracellular matrix structural constituent);GO:0005509(calcium ion binding);GO:0005515(protein binding);GO:0005576(extracellular region);GO:0005604(basement membrane);GO:0005615(extracellular space)…	NA	NA	NA	fibrillin 1 [Source:HGNC Symbol;Acc:HGNC:3603]	protein_coding	5.23333	4.69377	6.43904	4.05876	6.27502	2.55975	5.71106	1.97007	4.7654	4.50351	1.80746	4.3829	2.11167	7.221	2.39509	5.65203	6.62677	22.1271	10.5116	10.0684	17.083	6.24605	7.72665	1.63553	0.425357	-1.23325	0.00014499	0.0206865	down	yes
MSTRG.5385	NDC1	ENST00000371429	GO:0005634(nucleus);GO:0005635(nuclear envelope);GO:0005643(nuclear pore);GO:0005737(cytoplasm);GO:0005886(plasma membrane);GO:0006110(regulation of glycolytic process);GO:0006406(mRNA export from nucleus);GO:0006409(tRNA export from nucleus);GO:0006999(nuclear pore organization);GO:0007129(synapsis);GO:0007283(spermatogenesis);GO:0015031(protein transport);GO:0015629(actin cytoskeleton);GO:00160…	03013(RNA transport)	K14315	NA	NDC1 transmembrane nucleoporin [Source:HGNC Symbol;Acc:HGNC:25525]	protein_coding	2.4812	2.33485	2.08945	0.637043	2.30759	0.643873	1.83032	0.729122	2.14719	1.75005	1.13102	1.08735	0.71326	2.2326	0.996079	1.44358	3.31083	3.70151	2.67026	2.04339	2.65372	3.51997	2.16927	2.3086	0.548643	-0.866061	0.000150508	0.0212375	down	no
MSTRG.62563	NSA2	ENST00000610426;ENST00000515524;ENST00000296802	GO:0000460(maturation of 5.8S rRNA);GO:0000470(maturation of LSU-rRNA);GO:0003723(RNA binding);GO:0005634(nucleus);GO:0005730(nucleolus);GO:0006364(rRNA processing);GO:0030687(preribosome, large subunit precursor);GO:0042254(ribosome biogenesis);GO:0042254(ribosome biogenesis)	NA	K14842	NA	NSA2 ribosome biogenesis factor [Source:HGNC Symbol;Acc:HGNC:30728]	protein_coding	1.20808	0.696442	1.10352	0.394527	0.71351	0.236693	1.09319	0.349536	0.886491	0.813795	0.68277	0.558845	0.200435	0.857287	0.350306	0.543022	1.74473	1.16151	0.769501	1.39894	0.790702	1.28537	1.05472	3.154	0.470464	-1.08784	0.000157363	0.0220873	down	yes
MSTRG.69499	FNDC1	ENST00000297267	GO:0005515(protein binding);GO:0005576(extracellular region);GO:0016607(nuclear speck)	NA	NA	NA	fibronectin type III domain containing 1 [Source:HGNC Symbol;Acc:HGNC:21184]	protein_coding	0.853501	1.06426	0.859103	0.381632	0.351559	0.445708	1.07838	0.329317	0.423537	0.673269	0.290006	1.6632	0.447275	0.866065	0.519786	1.44095	1.08613	8.3061	1.77751	0.817342	2.14782	1.66307	1.96363	0.232171	0.324766	-1.62253	0.000157995	0.0220873	down	yes
MSTRG.61900	OXCT1	ENST00000512084;ENST00000196371;ENST00000510634;ENST00000509987	GO:0005654(nucleoplasm);GO:0005739(mitochondrion);GO:0005759(mitochondrial matrix);GO:0007420(brain development);GO:0007507(heart development);GO:0007584(response to nutrient);GO:0008260(3-oxoacid CoA-transferase activity);GO:0008410(CoA-transferase activity);GO:0009725(response to hormone);GO:0014823(response to activity);GO:0016740(transferase activity);GO:0035774(positive regulation of insulin…	00072(Synthesis and degradation of ketone bodies);00280(Valine, leucine and isoleucine degradation);00650(Butanoate metabolism);00650(Butanoate metabolism)	K01027	EC:2.8.3.5	3-oxoacid CoA-transferase 1 [Source:HGNC Symbol;Acc:HGNC:8527]	protein_coding	1.84151	1.08347	1.67572	0.607825	1.50773	0.798711	1.97429	0.286016	1.61923	1.18273	0.381467	0.488174	0.752296	1.01053	0.561273	1.36779	2.6715	3.29603	1.4959	1.47729	1.92629	3.17669	1.18571	3.71534	0.452335	-1.14454	0.000158007	0.0220873	down	yes
MSTRG.13924	ADAM12	ENST00000448723;ENST00000368679;ENST00000368676	GO:0004222(metalloendopeptidase activity);GO:0005515(protein binding);GO:0005576(extracellular region);GO:0005654(nucleoplasm);GO:0005886(plasma membrane);GO:0006508(proteolysis);GO:0007155(cell adhesion);GO:0007520(myoblast fusion);GO:0008233(peptidase activity);GO:0008237(metallopeptidase activity);GO:0016020(membrane);GO:0016021(integral component of membrane);GO:0016787(hydrolase activity);GO…	NA	NA	NA	ADAM metallopeptidase domain 12 [Source:HGNC Symbol;Acc:HGNC:190]	protein_coding	0.696966	0.570516	0.738923	0.241268	0.383824	0.668563	0.641088	0.530688	0.456998	0.742739	0.214919	0.447573	0.482753	0.628526	0.924315	0.498349	0.956521	3.46746	1.53387	1.47526	1.6714	0.796079	0.712858	0.389917	0.402969	-1.31126	0.000161465	0.0224656	down	yes
MSTRG.34525	NF1	ENST00000456735;ENST00000358273;ENST00000487476;ENST00000356175;ENST00000468273;ENST00000581113;ENST00000490416;ENST00000431387	GO:0000165(MAPK cascade);GO:0001649(osteoblast differentiation);GO:0001656(metanephros development);GO:0001666(response to hypoxia);GO:0001889(liver development);GO:0001937(negative regulation of endothelial cell proliferation);GO:0001938(positive regulation of endothelial cell proliferation);GO:0001952(regulation of cell-matrix adhesion);GO:0001953(negative regulation of cell-matrix adhesion);GO…	01521(EGFR tyrosine kinase inhibitor resistance);04010(MAPK signaling pathway);04014(Ras signaling pathway);04014(Ras signaling pathway)	K08052	NA	neurofibromin 1 [Source:HGNC Symbol;Acc:HGNC:7765]	protein_coding	3.61202	3.2471	3.67906	1.70347	3.8052	2.08274	2.49348	1.62205	4.12274	3.03442	2.82467	2.87094	1.61458	3.11595	1.92294	2.69694	5.49162	3.90587	4.39967	3.9715	3.48948	4.50696	3.14461	6.50201	0.627593	-0.672099	0.000166084	0.0228953	down	no
MSTRG.34298	RPL23A	ENST00000422514;ENST00000394938;ENST00000472628;ENST00000578181;ENST00000496182	GO:0000027(ribosomal large subunit assembly);GO:0000184(nuclear-transcribed mRNA catabolic process, nonsense-mediated decay);GO:0003723(RNA binding);GO:0003735(structural constituent of ribosome);GO:0005515(protein binding);GO:0005634(nucleus);GO:0005730(nucleolus);GO:0005737(cytoplasm);GO:0005829(cytosol);GO:0005840(ribosome);GO:0006412(translation);GO:0006413(translational initiation);GO:000661…	03010(Ribosome);03010(Ribosome)	K02893	NA	ribosomal protein L23a [Source:HGNC Symbol;Acc:HGNC:10317]	protein_coding	28.6766	23.9653	26.0265	8.72507	22.5437	10.4634	13.1411	6.8125	17.8303	20.6484	7.51484	9.98116	6.55905	20.1336	8.85052	13.296	37.9221	24.2698	27.2632	28.8282	30.8115	17.0687	21.6053	53.1008	0.508923	-0.974481	0.000169427	0.0231836	down	no
MSTRG.34440	SUZ12	ENST00000580398;ENST00000322652	GO:0000122(negative regulation of transcription by RNA polymerase II);GO:0000978(RNA polymerase II cis-regulatory region sequence-specific DNA binding);GO:0001226(RNA polymerase II transcription corepressor binding);GO:0001739(sex chromatin);GO:0003682(chromatin binding);GO:0003723(RNA binding);GO:0005515(protein binding);GO:0005634(nucleus);GO:0005654(nucleoplasm);GO:0005730(nucleolus);GO:000632…	NA	K11463	NA	SUZ12 polycomb repressive complex 2 subunit [Source:HGNC Symbol;Acc:HGNC:17101]	protein_coding	1.64399	1.13322	1.32445	0.569386	1.10229	0.436787	0.649348	0.410685	1.02571	0.66954	0.621696	0.559415	0.639069	0.879056	0.536289	0.847493	1.54794	1.21414	1.4148	1.29931	1.2006	1.9867	0.973941	1.73281	0.573797	-0.801388	0.000173046	0.0236373	down	no
MSTRG.28975	ITGA11	ENST00000315757;ENST00000423218	GO:0001649(osteoblast differentiation);GO:0005518(collagen binding);GO:0005886(plasma membrane);GO:0005925(focal adhesion);GO:0006929(substrate-dependent cell migration);GO:0007155(cell adhesion);GO:0007160(cell-matrix adhesion);GO:0007229(integrin-mediated signaling pathway);GO:0007517(muscle organ development);GO:0008305(integrin complex);GO:0016020(membrane);GO:0016021(integral component of me…	04151(PI3K-Akt signaling pathway);04510(Focal adhesion);04512(ECM-receptor interaction);04810(Regulation of actin cytoskeleton);05165(Human papillomavirus infection);05410(Hypertrophic cardiomyopathy (HCM));05412(Arrhythmogenic right ventricular cardiomyopathy (ARVC));05414(Dilated cardiomyopathy (DCM));05414(Dilated cardiomyopathy (DCM))	K06587	NA	integrin subunit alpha 11 [Source:HGNC Symbol;Acc:HGNC:6136]	protein_coding	0.716814	0.74335	0.923702	0.552212	1.08962	0.310222	1.93135	0.539594	0.7616	0.752318	0.299389	3.49957	0.197621	1.40418	0.83871	0.748963	4.43952	7.99261	4.58377	0.739413	2.03409	3.34868	1.00627	0.59344	0.30943	-1.69232	0.000175292	0.0238714	down	yes
MSTRG.71887	STEAP1	ENST00000297205	GO:0005215(transporter activity);GO:0005768(endosome);GO:0005886(plasma membrane);GO:0005887(integral component of plasma membrane);GO:0005911(cell-cell junction);GO:0006811(ion transport);GO:0010008(endosome membrane);GO:0015267(channel activity);GO:0016020(membrane);GO:0016021(integral component of membrane);GO:0016491(oxidoreductase activity);GO:0046872(metal ion binding);GO:0055072(iron ion h…	04978(Mineral absorption)	K14737	EC:1.16.1.-	STEAP family member 1 [Source:HGNC Symbol;Acc:HGNC:11378]	protein_coding	2.13422	0.828234	1.70166	0.204814	1.62383	0.535406	0.243315	0.0821531	0.191827	2.00983	0.695612	1.57135	0.158016	0.842365	0.842312	0.652044	9.7395	3.54266	3.66029	3.21396	3.3879	1.35073	0.601832	0.709849	0.273155	-1.87221	0.000179206	0.0242938	down	yes
MSTRG.29147	ISLR	ENST00000249842;ENST00000559510;ENST00000395118;ENST00000560862	GO:0002576(platelet degranulation);GO:0005515(protein binding);GO:0005576(extracellular region);GO:0007155(cell adhesion);GO:0031093(platelet alpha granule lumen);GO:0070062(extracellular exosome);GO:0070062(extracellular exosome)	NA	NA	NA	immunoglobulin superfamily containing leucine rich repeat [Source:HGNC Symbol;Acc:HGNC:6133]	protein_coding	8.68393	6.99764	9.43527	4.99354	10.3892	2.99275	11.4846	3.89789	7.97878	7.49915	2.87022	20.6265	3.8022	11.0345	5.26542	5.44269	11.5593	36.9977	33.0474	18.0717	29.947	12.8229	10.0064	3.4925	0.395635	-1.33776	0.000180424	0.0243852	down	yes
MSTRG.66065	H4C3	ENST00000377803	GO:0000183(chromatin silencing at rDNA);GO:0000228(nuclear chromosome);GO:0000784(nuclear chromosome, telomeric region);GO:0000786(nucleosome);GO:0000788(nuclear nucleosome);GO:0003677(DNA binding);GO:0003723(RNA binding);GO:0005515(protein binding);GO:0005576(extracellular region);GO:0005634(nucleus);GO:0005654(nucleoplasm);GO:0005694(chromosome);GO:0006303(double-strand break repair via nonhomo…	05034(Alcoholism);05203(Viral carcinogenesis);05322(Systemic lupus erythematosus)	NA	NA	H4 clustered histone 3 [Source:HGNC Symbol;Acc:HGNC:4787]	protein_coding	46.1196	40.7222	45.1092	14.2536	29.7119	9.52706	29.113	19.5534	40.8287	27.8309	29.8789	27.9469	17.8998	39.8215	20.3447	22.7122	59.5683	51.4728	41.4579	36.8328	56.187	43.6902	41.624	67.7203	0.57881	-0.788837	0.000182735	0.024513	down	no
MSTRG.64852	PTTG1	ENST00000520452;ENST00000352433;ENST00000393964;ENST00000517480	GO:0004869(cysteine-type endopeptidase inhibitor activity);GO:0005515(protein binding);GO:0005634(nucleus);GO:0005737(cytoplasm);GO:0005829(cytosol);GO:0006281(DNA repair);GO:0006511(ubiquitin-dependent protein catabolic process);GO:0006974(cellular response to DNA damage stimulus);GO:0007049(cell cycle);GO:0007059(chromosome segregation);GO:0007283(spermatogenesis);GO:0010951(negative regulation…	04110(Cell cycle);04114(Oocyte meiosis);05166(Human T-cell leukemia virus 1 infection);05166(Human T-cell leukemia virus 1 infection)	K06635	NA	PTTG1 regulator of sister chromatid separation, securin [Source:HGNC Symbol;Acc:HGNC:9690]	protein_coding	1.67041	1.6507	0.848829	0.308775	0.573565	0.889936	2.81563	0.596216	1.53554	1.20255	1.23772	1.80467	0.557091	0.76771	1.01801	0.658256	4.33394	2.90908	0.959499	0.969049	1.05067	8.77899	0.616515	8.85132	0.318514	-1.65057	0.000184143	0.0245518	down	yes
MSTRG.51955	LGALS1	ENST00000215909	GO:0002317(plasma cell differentiation);GO:0003723(RNA binding);GO:0005515(protein binding);GO:0005576(extracellular region);GO:0005615(extracellular space);GO:0005622(intracellular);GO:0005634(nucleus);GO:0005737(cytoplasm);GO:0005788(endoplasmic reticulum lumen);GO:0005829(cytosol);GO:0006915(apoptotic process);GO:0009986(cell surface);GO:0010812(negative regulation of cell-substrate adhesion);…	NA	K06830	NA	galectin 1 [Source:HGNC Symbol;Acc:HGNC:6561]	protein_coding	43.5781	57.1759	48.6419	30.0374	24.7261	18.6562	27.4352	16.5066	33.7711	24.662	15.0886	31.1268	26.162	40.6538	20.4442	39.44	111.023	88.8771	59.3887	73.8506	72.2036	42.7019	47.6545	17.4077	0.485382	-1.04281	0.000184426	0.0245518	down	yes
MSTRG.7909	GLMP	ENST00000614643;ENST00000362007;ENST00000612353;ENST00000481050;ENST00000622703	GO:0005634(nucleus);GO:0005764(lysosome);GO:0005765(lysosomal membrane);GO:0005829(cytosol);GO:0016020(membrane);GO:0016021(integral component of membrane);GO:0045944(positive regulation of transcription by RNA polymerase II);GO:0045944(positive regulation of transcription by RNA polymerase II)	NA	NA	NA	glycosylated lysosomal membrane protein [Source:HGNC Symbol;Acc:HGNC:29436]	protein_coding	3.3632	3.51188	3.09874	1.20209	2.74952	1.50457	2.34488	1.57794	2.65326	2.99743	1.48016	1.54404	2.01963	3.30459	1.57314	2.40173	3.46387	6.19962	5.24227	3.90473	4.06193	3.28055	2.95177	2.44905	0.591479	-0.757602	0.000186091	0.0246142	down	no
MSTRG.16457	CLNS1A	ENST00000525428;ENST00000528364;ENST00000525064	GO:0000387(spliceosomal snRNP assembly);GO:0003723(RNA binding);GO:0005515(protein binding);GO:0005634(nucleus);GO:0005654(nucleoplasm);GO:0005737(cytoplasm);GO:0005829(cytosol);GO:0005856(cytoskeleton);GO:0005886(plasma membrane);GO:0006821(chloride transport);GO:0006884(cell volume homeostasis);GO:0034709(methylosome);GO:0034715(pICln-Sm protein complex);GO:0034715(pICln-Sm protein complex)	03013(RNA transport);03013(RNA transport)	NA	NA	chloride nucleotide-sensitive channel 1A [Source:HGNC Symbol;Acc:HGNC:2080]	protein_coding	1.86343	1.03765	1.6498	0.695059	1.17186	0.883388	1.51975	0.810458	1.19069	1.205	1.81412	1.8789	0.984619	1.68092	0.911746	1.39564	2.20128	20.2569	1.76317	1.91441	1.51323	1.5135	1.0921	1.23976	0.328519	-1.60595	0.000186232	0.0246142	down	yes
MSTRG.4558	GRIK3	ENST00000373093;ENST00000373091	GO:0001640(adenylate cyclase inhibiting G protein-coupled glutamate receptor activity);GO:0004970(ionotropic glutamate receptor activity);GO:0005216(ion channel activity);GO:0005886(plasma membrane);GO:0005887(integral component of plasma membrane);GO:0006811(ion transport);GO:0007196(adenylate cyclase-inhibiting G protein-coupled glutamate receptor signaling pathway);GO:0007215(glutamate recepto…	04080(Neuroactive ligand-receptor interaction);04724(Glutamatergic synapse);04724(Glutamatergic synapse)	NA	NA	glutamate ionotropic receptor kainate type subunit 3 [Source:HGNC Symbol;Acc:HGNC:4581]	protein_coding	0.0142912	0	0.0976162	0.0123084	0.131038	0.131895	0	0.0124992	0.0332859	0.0237044	0	0.0201032	0.0200616	0.00391412	0.00971342	0.0157713	0.00726405	0.0063418	0	0.146993	0.0278708	0.0695152	0.0314296	5.67294	0.044127	-4.5022	0.00018749	0.024744	down	yes
MSTRG.51841	LARGE1	ENST00000413114;ENST00000674999;ENST00000430220;ENST00000432776;ENST00000397394;ENST00000423375;ENST00000434071;ENST00000676132;ENST00000608642;ENST00000676370;ENST00000610186;ENST00000675416;ENST00000354992;ENST00000675277;ENST00000674789;ENST00000476315;ENST00000402320	GO:0000139(Golgi membrane);GO:0003824(catalytic activity);GO:0005794(Golgi apparatus);GO:0006044(N-acetylglucosamine metabolic process);GO:0006486(protein glycosylation);GO:0006493(protein O-linked glycosylation);GO:0006688(glycosphingolipid biosynthetic process);GO:0008152(metabolic process);GO:0008375(acetylglucosaminyltransferase activity);GO:0009101(glycoprotein biosynthetic process);GO:00150…	00515(Mannose type O-glycan biosynthesis);00515(Mannose type O-glycan biosynthesis)	NA	NA	LARGE xylosyl- and glucuronyltransferase 1 [Source:HGNC Symbol;Acc:HGNC:6511]	protein_coding	3.22737	2.3124	3.2225	1.5371	3.18978	1.81789	2.79148	2.83007	2.54073	2.3782	4.73925	3.53503	2.20361	1.96052	1.64994	1.86925	0.723945	2.27305	1.40348	1.68732	2.53717	2.05612	1.34259	1.62473	1.5315	0.614947	0.000189864	0.0250204	up	no
MSTRG.64572	PCYOX1L	ENST00000514349;ENST00000274569	GO:0001735(prenylcysteine oxidase activity);GO:0002576(platelet degranulation);GO:0005576(extracellular region);GO:0016020(membrane);GO:0016491(oxidoreductase activity);GO:0016670(oxidoreductase activity, acting on a sulfur group of donors, oxygen as acceptor);GO:0030327(prenylated protein catabolic process);GO:0030328(prenylcysteine catabolic process);GO:0031093(platelet alpha granule lumen);GO:…	NA	NA	NA	prenylcysteine oxidase 1 like [Source:HGNC Symbol;Acc:HGNC:28477]	protein_coding	1.28406	1.00753	0.905285	1.06364	0.926964	0.707569	1.15593	0.630911	1.12712	1.13578	0.671329	0.658014	0.759172	1.3526	0.466215	0.912644	1.47491	1.82889	1.11659	1.42223	1.57333	1.94942	1.05299	1.77718	0.605335	-0.724195	0.000195259	0.0256186	down	no
MSTRG.45861	CDCA7	ENST00000410101;ENST00000347703;ENST00000306721	GO:0005634(nucleus);GO:0005654(nucleoplasm);GO:0005737(cytoplasm);GO:0005829(cytosol);GO:0006355(regulation of transcription, DNA-templated);GO:0006915(apoptotic process);GO:0042127(regulation of cell population proliferation);GO:0042127(regulation of cell population proliferation)	NA	NA	NA	cell division cycle associated 7 [Source:HGNC Symbol;Acc:HGNC:14628]	protein_coding	0.295736	1.86557	0.288738	0.220965	0.855695	0.318704	1.46136	0.77948	0.896309	0.639149	0.693236	0.29762	0.227629	0.363259	0.505673	0.654974	0.972455	0.800614	4.38202	2.38255	0.901426	3.59109	0.451105	1.97026	0.335375	-1.57615	0.00019702	0.0257112	down	yes
MSTRG.16329	PGM2L1	ENST00000298198	GO:0005829(cytosol);GO:0005975(carbohydrate metabolic process);GO:0005978(glycogen biosynthetic process);GO:0005980(glycogen catabolic process);GO:0006006(glucose metabolic process);GO:0016740(transferase activity);GO:0016853(isomerase activity);GO:0016868(intramolecular transferase activity, phosphotransferases);GO:0019388(galactose catabolic process);GO:0046872(metal ion binding);GO:0047933(glu…	00500(Starch and sucrose metabolism)	K11809	EC:2.7.1.106	phosphoglucomutase 2 like 1 [Source:HGNC Symbol;Acc:HGNC:20898]	protein_coding	1.44292	0.723661	2.61616	0.364182	1.44477	0.635981	2.02369	0.495234	1.17773	0.845227	0.625137	1.53884	0.556052	1.92737	0.971115	0.814136	4.50132	4.11378	3.30515	1.64849	1.56936	2.43901	1.15857	1.76438	0.443955	-1.17152	0.000197111	0.0257112	down	yes
MSTRG.57812	CPZ;GPR78	ENST00000360986;ENST00000382487;ENST00000382480;ENST00000315782	GO:0004180(carboxypeptidase activity);GO:0004181(metallocarboxypeptidase activity);GO:0005515(protein binding);GO:0005576(extracellular region);GO:0005615(extracellular space);GO:0006508(proteolysis);GO:0006518(peptide metabolic process);GO:0008233(peptidase activity);GO:0008237(metallopeptidase activity);GO:0008270(zinc ion binding);GO:0016055(Wnt signaling pathway);GO:0016485(protein processing…	NA	K08418	NA	carboxypeptidase Z [Source:HGNC Symbol;Acc:HGNC:2333];G protein-coupled receptor 78 [Source:HGNC Symbol;Acc:HGNC:4528]	protein_coding	0.50847	0.430791	0.414097	0.220526	0.6579	0.145187	0.37693	0.213749	0.457732	0.28818	0.0834708	0.367784	0.109048	0.323625	0.212081	0.295904	0.315633	1.31498	0.689446	0.631942	0.901461	2.16555	0.374327	0.167427	0.389091	-1.36182	0.000201019	0.0259944	down	yes
MSTRG.3200	MEGF6	ENST00000491842;ENST00000356575;ENST00000294599	GO:0005509(calcium ion binding);GO:0005515(protein binding);GO:0005575(cellular_component);GO:0005576(extracellular region);GO:0008150(biological_process);GO:0008150(biological_process)	NA	NA	NA	multiple EGF like domains 6 [Source:HGNC Symbol;Acc:HGNC:3232]	protein_coding	2.39563	4.77078	2.54914	5.17778	4.82186	2.51277	4.74172	8.62144	2.45111	12.189	8.70429	4.63332	4.49258	4.78322	4.20884	5.21797	1.67501	3.42261	4.32266	1.71102	2.44187	1.83506	4.4808	1.57797	1.91623	0.93827	0.000202106	0.0260973	up	no
MSTRG.52015	C22orf23	ENST00000422191;ENST00000249079;ENST00000403305;ENST00000619227	GO:0003674(molecular_function);GO:0005515(protein binding);GO:0005575(cellular_component);GO:0008150(biological_process);GO:0008150(biological_process)	NA	NA	NA	chromosome 22 open reading frame 23 [Source:HGNC Symbol;Acc:HGNC:18589]	protein_coding	1.40667	1.09456	1.02627	0.534504	0.678284	0.888261	1.64552	0.945305	0.954488	0.863875	0.557999	1.36083	1.07998	1.02103	0.530628	1.04654	0.564559	0.806376	0.799039	0.738829	0.621887	0.516598	0.595041	0.798866	1.4367	0.52276	0.000203812	0.0262513	up	no
ENSG00000186310	NAP1L3	ENST00000373079	GO:0003682(chromatin binding);GO:0005515(protein binding);GO:0005634(nucleus);GO:0006334(nucleosome assembly);GO:0030154(cell differentiation);GO:0042393(histone binding)	NA	K11281	NA	nucleosome assembly protein 1 like 3 [Source:HGNC Symbol;Acc:HGNC:7639]	protein_coding	0.296416	0.324386	0.437886	0.149842	0.260872	0.252247	0.269981	0.038297	0.22621	0.161449	0.067363	0.177391	0.134267	0.223105	0.067359	0.306485	0.374211	0.611079	0.370211	0.867334	0.964192	0.273576	0.466731	0.26084	0.405136	-1.30352	0.00020656	0.0265568	down	yes
MSTRG.34032	ALDH3A1	ENST00000457500;ENST00000225740;ENST00000574162;ENST00000494157;ENST00000570414;ENST00000444455;ENST00000439102	GO:0001666(response to hypoxia);GO:0004028(3-chloroallyl aldehyde dehydrogenase activity);GO:0004029(aldehyde dehydrogenase (NAD+) activity);GO:0004030(aldehyde dehydrogenase [NAD(P)+] activity);GO:0005515(protein binding);GO:0005615(extracellular space);GO:0005737(cytoplasm);GO:0005783(endoplasmic reticulum);GO:0005829(cytosol);GO:0005886(plasma membrane);GO:0006081(cellular aldehyde metabolic p…	00010(Glycolysis / Gluconeogenesis);00340(Histidine metabolism);00350(Tyrosine metabolism);00360(Phenylalanine metabolism);00410(beta-Alanine metabolism);00980(Metabolism of xenobiotics by cytochrome P450);00982(Drug metabolism - cytochrome P450);05204(Chemical carcinogenesis);05204(Chemical carcinogenesis)	NA	NA	aldehyde dehydrogenase 3 family member A1 [Source:HGNC Symbol;Acc:HGNC:405]	protein_coding	0.5799	0.702512	0.576996	4.91422	1.59189	1.18564	2.81488	1.89187	0.53122	1.39549	1.42255	0.49378	0.24819	0.793198	0.416369	5.7343	0.197042	0.0427744	0.137942	1.18983	0.214052	0.629507	1.05484	0.0325954	3.61475	1.8539	0.000206848	0.0265568	up	yes
MSTRG.16487	AAMDC	ENST00000532481;ENST00000525034;ENST00000630098;ENST00000393427;ENST00000533193;ENST00000525409;ENST00000527134;ENST00000304716;ENST00000526415	GO:0005515(protein binding);GO:0005737(cytoplasm);GO:0045600(positive regulation of fat cell differentiation);GO:0045600(positive regulation of fat cell differentiation)	NA	NA	NA	adipogenesis associated Mth938 domain containing [Source:HGNC Symbol;Acc:HGNC:30205]	protein_coding	0.782008	0.906316	0.760898	0.489251	0.807838	0.508097	0.548486	0.510249	0.819234	1.0465	0.74189	0.938955	0.817658	1.02812	0.495533	0.482646	0.987521	11.4919	0.900054	1.02336	0.845734	0.805558	0.751548	0.765411	0.33247	-1.58871	0.000208629	0.026709	down	yes
MSTRG.18289	GAPDH	ENST00000229239;ENST00000396859;ENST00000396861;ENST00000396858;ENST00000619601	GO:0000166(nucleotide binding);GO:0000226(microtubule cytoskeleton organization);GO:0004365(glyceraldehyde-3-phosphate dehydrogenase (NAD+) (phosphorylating) activity);GO:0005515(protein binding);GO:0005634(nucleus);GO:0005737(cytoplasm);GO:0005811(lipid droplet);GO:0005829(cytosol);GO:0005856(cytoskeleton);GO:0005886(plasma membrane);GO:0006006(glucose metabolic process);GO:0006094(gluconeogenes…	00010(Glycolysis / Gluconeogenesis);04066(HIF-1 signaling pathway);05010(Alzheimer disease);05010(Alzheimer disease)	NA	NA	glyceraldehyde-3-phosphate dehydrogenase [Source:HGNC Symbol;Acc:HGNC:4141]	protein_coding	118.328	118.345	60.3157	42.56	60.7174	34.871	142.2	31.5532	116.937	80.3103	78.285	127.728	32.9634	74.5868	41.0409	51.7244	243.116	308.125	129.878	89.0974	99.2801	178.34	70.5095	185.229	0.465053	-1.10453	0.000210296	0.0268076	down	yes
MSTRG.1844	PCDH19	ENST00000420881;ENST00000255531;ENST00000373034	GO:0005509(calcium ion binding);GO:0005886(plasma membrane);GO:0005887(integral component of plasma membrane);GO:0007155(cell adhesion);GO:0007156(homophilic cell adhesion via plasma membrane adhesion molecules);GO:0007420(brain development);GO:0016020(membrane);GO:0016021(integral component of membrane);GO:0016021(integral component of membrane)	NA	K16499	NA	protocadherin 19 [Source:HGNC Symbol;Acc:HGNC:14270]	protein_coding	0.136031	0.138492	0.22835	0.05429	0.109503	0.12574	0.095278	0.092387	0.058209	0.083958	0.020836	0.048246	0.065277	0.125817	0.112184	0.118757	1.16372	0.366178	0.213987	0.206734	0.352377	0.081236	0.0708814	0.09687	0.316098	-1.66155	0.00021086	0.0268415	down	yes
MSTRG.76923	EPPK1	ENST00000568225;ENST00000615648	GO:0003723(RNA binding);GO:0005198(structural molecule activity);GO:0005737(cytoplasm);GO:0005856(cytoskeleton);GO:0005882(intermediate filament);GO:0005886(plasma membrane);GO:0005923(bicellular tight junction);GO:0010839(negative regulation of keratinocyte proliferation);GO:0016020(membrane);GO:0016323(basolateral plasma membrane);GO:0016327(apicolateral plasma membrane);GO:0019215(intermediate…	NA	NA	NA	epiplakin 1 [Source:HGNC Symbol;Acc:HGNC:15577]	protein_coding	1.40961	13.2515	6.00832	0.994044	0.956809	4.50664	3.97864	2.70559	0.908254	2.87658	10.3924	22.0517	2.64622	6.53895	1.00144	1.40097	1.62033	1.77655	3.09056	1.76613	0.797231	1.50294	1.28878	0.938776	3.19324	1.67502	0.000212491	0.0270107	up	yes
MSTRG.41463	RPL28	ENST00000559463;ENST00000560583;ENST00000344063;ENST00000558131;ENST00000431533;ENST00000560055;ENST00000558815;ENST00000428193	GO:0000184(nuclear-transcribed mRNA catabolic process, nonsense-mediated decay);GO:0003723(RNA binding);GO:0003735(structural constituent of ribosome);GO:0005515(protein binding);GO:0005829(cytosol);GO:0005840(ribosome);GO:0006412(translation);GO:0006413(translational initiation);GO:0006614(SRP-dependent cotranslational protein targeting to membrane);GO:0016020(membrane);GO:0019083(viral transcri…	03010(Ribosome);03010(Ribosome)	K02903	NA	ribosomal protein L28 [Source:HGNC Symbol;Acc:HGNC:10330]	protein_coding	15.3675	15.1613	13.0054	5.57369	11.8113	7.45058	8.08955	5.7843	9.88972	8.67216	8.87784	9.5823	4.65385	11.3658	7.6676	7.44301	18.5351	17.0563	12.1556	16.1854	15.8551	10.1941	14.3092	18.3894	0.612958	-0.706139	0.000215014	0.0272159	down	no
MSTRG.1291	AR	ENST00000374690	GO:0000122(negative regulation of transcription by RNA polymerase II);GO:0000790(nuclear chromatin);GO:0000976(transcription regulatory region sequence-specific DNA binding);GO:0000978(RNA polymerase II cis-regulatory region sequence-specific DNA binding);GO:0000981(DNA-binding transcription factor activity, RNA polymerase II-specific);GO:0001085(RNA polymerase II transcription factor binding);GO…	04114(Oocyte meiosis);05200(Pathways in cancer);05215(Prostate cancer)	NA	NA	androgen receptor [Source:HGNC Symbol;Acc:HGNC:644]	protein_coding	0.554116	0.567822	0.745914	0.54042	0.765854	0.349099	0.771731	0.347826	0.49945	0.774252	0.109701	0.503294	0.700718	0.526508	0.280994	0.547585	0.475854	1.41419	0.891286	0.871136	1.14083	1.55667	1.21582	1.01777	0.500101	-0.999709	0.00022078	0.027632	down	no
MSTRG.66208	H2BC17	ENST00000616182	GO:0000786(nucleosome);GO:0003677(DNA binding);GO:0005515(protein binding);GO:0005634(nucleus);GO:0005654(nucleoplasm);GO:0005694(chromosome);GO:0005829(cytosol);GO:0006334(nucleosome assembly);GO:0016567(protein ubiquitination);GO:0046982(protein heterodimerization activity)	05034(Alcoholism);05203(Viral carcinogenesis);05322(Systemic lupus erythematosus)	NA	NA	H2B clustered histone 17 [Source:HGNC Symbol;Acc:HGNC:4758]	protein_coding	9.04864	13.7428	5.70967	1.73819	1.76914	2.0988	5.53337	3.2846	3.36195	4.76265	14.4284	12.4241	2.29173	4.26124	6.36191	6.84056	34.4759	24.9196	13.9655	7.38401	12.9239	33.1632	7.65424	7.37887	0.344192	-1.53871	0.000221073	0.027632	down	yes
MSTRG.33427	TXNDC17	ENST00000250101;ENST00000570330;ENST00000574838	GO:0004601(peroxidase activity);GO:0005515(protein binding);GO:0005737(cytoplasm);GO:0005829(cytosol);GO:0033209(tumor necrosis factor-mediated signaling pathway);GO:0047134(protein-disulfide reductase activity);GO:0055114(oxidation-reduction process);GO:0070062(extracellular exosome);GO:0098869(cellular oxidant detoxification);GO:0098869(cellular oxidant detoxification)	NA	NA	NA	thioredoxin domain containing 17 [Source:HGNC Symbol;Acc:HGNC:28218]	protein_coding	2.5366	2.35711	2.24027	0.759102	2.13893	0.895706	1.90813	1.30811	1.59815	0.808878	1.30085	0.763215	0.468875	2.3762	1.32523	1.34302	6.77492	5.033	3.13581	2.66476	1.21935	4.90549	1.67613	1.92607	0.441337	-1.18005	0.000222816	0.0278111	down	yes
MSTRG.39074	GET3	ENST00000357332;ENST00000591090	GO:0000166(nucleotide binding);GO:0005515(protein binding);GO:0005524(ATP binding);GO:0005634(nucleus);GO:0005654(nucleoplasm);GO:0005730(nucleolus);GO:0005737(cytoplasm);GO:0005783(endoplasmic reticulum);GO:0005789(endoplasmic reticulum membrane);GO:0006620(posttranslational protein targeting to endoplasmic reticulum membrane);GO:0015105(arsenite transmembrane transporter activity);GO:0015700(ar…	NA	NA	NA	guided entry of tail-anchored proteins factor 3, ATPase [Source:HGNC Symbol;Acc:HGNC:752]	protein_coding	12.4247	11.4389	10.843	4.83889	8.27823	2.72049	6.61159	4.03863	8.09551	6.34367	4.68827	4.28492	4.24512	5.91751	4.91462	4.92107	15.8403	14.0307	8.74702	11.3498	9.48837	11.2631	11.2979	9.23464	0.573168	-0.802971	0.000225885	0.0280274	down	no
MSTRG.28736	DAPK2	ENST00000558069;ENST00000261891;ENST00000559306;ENST00000457488;ENST00000612884	GO:0000166(nucleotide binding);GO:0004672(protein kinase activity);GO:0004674(protein serine/threonine kinase activity);GO:0005515(protein binding);GO:0005516(calmodulin binding);GO:0005524(ATP binding);GO:0005634(nucleus);GO:0005737(cytoplasm);GO:0005794(Golgi apparatus);GO:0006468(protein phosphorylation);GO:0006915(apoptotic process);GO:0010506(regulation of autophagy);GO:0016020(membrane);GO:…	04140(Autophagy - animal);05200(Pathways in cancer);05219(Bladder cancer);05219(Bladder cancer)	K08803	EC:2.7.11.1	death associated protein kinase 2 [Source:HGNC Symbol;Acc:HGNC:2675]	protein_coding	1.17071	1.28362	1.48678	1.97684	3.48505	0.57108	1.28822	2.42288	1.39275	1.00322	0.618271	0.449052	2.04435	2.21155	1.40604	1.78316	0.586202	0.638164	1.17695	1.53823	0.724655	0.444659	0.810595	0.563026	1.89692	0.923663	0.000229223	0.028243	up	no
MSTRG.16454	PAK1	ENST00000356341;ENST00000526968;ENST00000533285;ENST00000528633;ENST00000524847;ENST00000278568;ENST00000530617;ENST00000529248;ENST00000528592	GO:0000166(nucleotide binding);GO:0001666(response to hypoxia);GO:0001726(ruffle);GO:0001934(positive regulation of protein phosphorylation);GO:0002223(stimulatory C-type lectin receptor signaling pathway);GO:0003824(catalytic activity);GO:0004672(protein kinase activity);GO:0004674(protein serine/threonine kinase activity);GO:0005515(protein binding);GO:0005518(collagen binding);GO:0005524(ATP b…	04010(MAPK signaling pathway);04012(ErbB signaling pathway);04014(Ras signaling pathway);04024(cAMP signaling pathway);04062(Chemokine signaling pathway);04360(Axon guidance);04392(Hippo signaling pathway - multiple species);04510(Focal adhesion);04625(C-type lectin receptor signaling pathway);04650(Natural killer cell mediated cytotoxicity);04660(T cell receptor signaling pathway);04666(Fc gamma…	K04409	EC:2.7.11.1	p21 (RAC1) activated kinase 1 [Source:HGNC Symbol;Acc:HGNC:8590]	protein_coding	1.2437	1.16144	0.650601	0.289736	1.26315	0.688943	1.20154	0.596578	1.0482	1.24449	4.31706	2.70724	0.294507	0.942403	0.93738	0.545561	2.55252	25.7568	1.75202	1.43762	1.0972	2.91204	0.977578	1.34607	0.252863	-1.98357	0.000229423	0.028243	down	yes
MSTRG.64423	YIPF5	ENST00000513112;ENST00000274496;ENST00000448443;ENST00000519064;ENST00000522203	GO:0005515(protein binding);GO:0005654(nucleoplasm);GO:0005783(endoplasmic reticulum);GO:0005789(endoplasmic reticulum membrane);GO:0005794(Golgi apparatus);GO:0015031(protein transport);GO:0016020(membrane);GO:0016021(integral component of membrane);GO:0016192(vesicle-mediated transport);GO:0030134(COPII-coated ER to Golgi transport vesicle);GO:0031410(cytoplasmic vesicle);GO:0042175(nuclear out…	NA	K20363	NA	Yip1 domain family member 5 [Source:HGNC Symbol;Acc:HGNC:24877]	protein_coding	2.25087	4.07799	2.89068	1.53278	3.87959	1.06036	3.51959	1.77122	2.82229	2.21874	2.39325	3.2208	0.895394	4.1541	0.989762	2.01907	7.77629	7.89368	3.68549	3.54958	1.91476	5.80284	3.55048	6.35738	0.489711	-1.03	0.000231933	0.0285128	down	yes
MSTRG.8200	FAM78B	ENST00000354422	NA	NA	NA	NA	family with sequence similarity 78 member B [Source:HGNC Symbol;Acc:HGNC:13495]	protein_coding	0.125405	0.180431	0.128149	0.170885	0.269265	0.126461	0.353174	0.0609342	0.185991	0.135911	0.0659075	0.17028	0.0856052	0.302742	0.177594	0.37139	0.363848	0.823797	0.409711	0.365713	0.660373	0.356983	0.253162	0.193359	0.424595	-1.23584	0.000232641	0.028537	down	yes
MSTRG.36742	ACTG1	ENST00000571691;ENST00000573283;ENST00000575087;ENST00000644774;ENST00000575994;ENST00000571721;ENST00000575842;ENST00000575659	GO:0000166(nucleotide binding);GO:0001525(angiogenesis);GO:0001738(morphogenesis of a polarized epithelium);GO:0001895(retina homeostasis);GO:0005200(structural constituent of cytoskeleton);GO:0005515(protein binding);GO:0005522(profilin binding);GO:0005524(ATP binding);GO:0005615(extracellular space);GO:0005634(nucleus);GO:0005737(cytoplasm);GO:0005829(cytosol);GO:0005856(cytoskeleton);GO:000588…	04015(Rap1 signaling pathway);04145(Phagosome);04210(Apoptosis);04390(Hippo signaling pathway);04510(Focal adhesion);04520(Adherens junction);04530(Tight junction);04611(Platelet activation);04670(Leukocyte transendothelial migration);04714(Thermogenesis);04810(Regulation of actin cytoskeleton);04919(Thyroid hormone signaling pathway);04921(Oxytocin signaling pathway);05100(Bacterial invasion of …	NA	NA	actin gamma 1 [Source:HGNC Symbol;Acc:HGNC:144]	protein_coding	120.186	156.203	128.666	84.756	136.061	72.6494	102.51	70.9566	110.586	105.52	106.515	114.991	57.8649	90.6785	67.1642	98.3323	246.772	121.634	189.575	117.368	148.415	182.332	127.812	146.132	0.634214	-0.656957	0.000234363	0.0286285	down	no
MSTRG.62372	CCNB1	ENST00000505500;ENST00000256442;ENST00000508407;ENST00000506572;ENST00000507798	GO:0000079(regulation of cyclin-dependent protein serine/threonine kinase activity);GO:0000086(G2/M transition of mitotic cell cycle);GO:0000278(mitotic cell cycle);GO:0000307(cyclin-dependent protein kinase holoenzyme complex);GO:0000922(spindle pole);GO:0000942(condensed nuclear chromosome outer kinetochore);GO:0001556(oocyte maturation);GO:0001701(in utero embryonic development);GO:0001933(neg…	04068(FoxO signaling pathway);04110(Cell cycle);04114(Oocyte meiosis);04115(p53 signaling pathway);04218(Cellular senescence);04914(Progesterone-mediated oocyte maturation);05170(Human immunodeficiency virus 1 infection);05170(Human immunodeficiency virus 1 infection)	NA	NA	cyclin B1 [Source:HGNC Symbol;Acc:HGNC:1579]	protein_coding	1.46104	1.45573	0.809537	0.30428	0.431217	0.55234	1.14985	0.55188	0.348023	0.898623	0.986544	1.42676	0.434418	0.905228	0.542912	0.826485	4.87596	3.16361	0.945622	0.747189	0.951504	3.89856	1.0919	1.09056	0.390246	-1.35754	0.000242823	0.0293729	down	yes
MSTRG.14182	PNPLA2	ENST00000336615	GO:0004806(triglyceride lipase activity);GO:0005654(nucleoplasm);GO:0005737(cytoplasm);GO:0005788(endoplasmic reticulum lumen);GO:0005789(endoplasmic reticulum membrane);GO:0005811(lipid droplet);GO:0005829(cytosol);GO:0005886(plasma membrane);GO:0006629(lipid metabolic process);GO:0006651(diacylglycerol biosynthetic process);GO:0010891(negative regulation of sequestering of triglyceride);GO:0010…	00561(Glycerolipid metabolism);04714(Thermogenesis);04923(Regulation of lipolysis in adipocytes)	K16816	EC:3.1.1.3	patatin like phospholipase domain containing 2 [Source:HGNC Symbol;Acc:HGNC:30802]	protein_coding	10.3839	13.1669	13.0604	14.6916	11.7462	12.5219	12.0512	16.3536	11.8692	10.6902	10.7543	6.81714	14.6774	10.0056	14.4664	18.3468	7.251	8.17529	12.0274	11.1428	9.53211	6.04846	9.9472	6.29264	1.4315	0.517525	0.000242857	0.0293729	up	no
MSTRG.22407	GJB2	ENST00000382844;ENST00000382848	GO:0002931(response to ischemia);GO:0005243(gap junction channel activity);GO:0005509(calcium ion binding);GO:0005515(protein binding);GO:0005737(cytoplasm);GO:0005793(endoplasmic reticulum-Golgi intermediate compartment);GO:0005829(cytosol);GO:0005886(plasma membrane);GO:0005887(integral component of plasma membrane);GO:0005921(gap junction);GO:0005922(connexin complex);GO:0007154(cell communica…	NA	NA	NA	gap junction protein beta 2 [Source:HGNC Symbol;Acc:HGNC:4284]	protein_coding	1.32006	0.840857	0.593806	0.118279	0.430445	0.526345	0.824165	0.501856	0.146222	0.548678	0.359877	5.96752	0.184061	1.25717	0.502748	0.148695	5.09928	5.76742	2.35946	1.15416	1.24718	1.35375	0.283388	17.0298	0.208063	-2.26491	0.000244269	0.0295034	down	yes
MSTRG.73548	TMEM176B	ENST00000492607;ENST00000434545;ENST00000326442;ENST00000450753;ENST00000429904;ENST00000447204	GO:0005515(protein binding);GO:0005634(nucleus);GO:0009887(animal organ morphogenesis);GO:0016020(membrane);GO:0016021(integral component of membrane);GO:0030154(cell differentiation);GO:0031965(nuclear membrane);GO:2001199(negative regulation of dendritic cell differentiation);GO:2001199(negative regulation of dendritic cell differentiation)	NA	NA	NA	transmembrane protein 176B [Source:HGNC Symbol;Acc:HGNC:29596]	protein_coding	17.9791	15.8128	11.4499	7.06037	7.44547	6.0057	7.0263	5.52029	6.98636	8.19136	2.79201	4.23947	7.59654	17.8463	5.93846	13.8729	36.2736	13.7407	14.2537	10.538	22.7273	25.7037	11.0135	26.9808	0.452032	-1.1455	0.000245983	0.0295097	down	yes
MSTRG.17661	SC5D	ENST00000264027;ENST00000392789;ENST00000527762	GO:0000248(C-5 sterol desaturase activity);GO:0005506(iron ion binding);GO:0005783(endoplasmic reticulum);GO:0005789(endoplasmic reticulum membrane);GO:0006629(lipid metabolic process);GO:0006694(steroid biosynthetic process);GO:0008202(steroid metabolic process);GO:0008610(lipid biosynthetic process);GO:0016020(membrane);GO:0016021(integral component of membrane);GO:0016126(sterol biosynthetic p…	00100(Steroid biosynthesis);00100(Steroid biosynthesis)	K00227	EC:1.14.19.20	sterol-C5-desaturase [Source:HGNC Symbol;Acc:HGNC:10547]	protein_coding	1.3701	1.61551	2.55335	0.308389	1.89314	0.543833	0.906967	0.6765	0.979581	0.810998	1.66626	1.04487	0.255357	0.462148	1.04837	0.838051	4.05786	1.78656	3.04722	1.71992	1.22552	2.81663	0.950338	5.50474	0.402046	-1.31457	0.000257188	0.0304612	down	yes
MSTRG.66164	H2AC11	ENST00000359193	GO:0000786(nucleosome);GO:0000790(nuclear chromatin);GO:0003677(DNA binding);GO:0005515(protein binding);GO:0005634(nucleus);GO:0005694(chromosome);GO:0006325(chromatin organization);GO:0006342(chromatin silencing);GO:0008150(biological_process);GO:0019899(enzyme binding);GO:0046982(protein heterodimerization activity);GO:0070062(extracellular exosome)	04217(Necroptosis);05034(Alcoholism);05322(Systemic lupus erythematosus)	K11251	NA	H2A clustered histone 11 [Source:HGNC Symbol;Acc:HGNC:4737]	protein_coding	5.35216	4.20099	0.430096	1.22861	2.00892	0.902704	2.44922	2.22435	0.575661	4.12116	2.42767	2.5676	2.38427	3.10706	0.368032	4.18567	12.1991	9.15675	4.11514	4.95586	10.4859	5.0298	5.10856	2.53272	0.359569	-1.47566	0.000257286	0.0304612	down	yes
MSTRG.9080	IPO9	ENST00000361565	GO:0005515(protein binding);GO:0005634(nucleus);GO:0005635(nuclear envelope);GO:0005737(cytoplasm);GO:0005829(cytosol);GO:0006606(protein import into nucleus);GO:0006886(intracellular protein transport);GO:0008536(Ran GTPase binding);GO:0015031(protein transport);GO:0016020(membrane);GO:0042393(histone binding);GO:0061608(nuclear import signal receptor activity)	NA	K20224	NA	importin 9 [Source:HGNC Symbol;Acc:HGNC:19425]	protein_coding	4.26925	5.5865	5.33288	2.41073	4.28225	2.79157	4.38748	3.01257	3.17351	3.81906	2.80432	3.40137	2.64817	5.07478	1.93014	2.5352	5.47694	5.28353	5.47067	5.21841	4.8566	6.91017	4.37081	6.97095	0.644774	-0.633135	0.000258074	0.0304741	down	no
MSTRG.16476	RSF1	ENST00000308488;ENST00000531026;ENST00000526324;ENST00000480887;ENST00000532556;ENST00000528095;ENST00000440064	GO:0000123(histone acetyltransferase complex);GO:0000790(nuclear chromatin);GO:0004402(histone acetyltransferase activity);GO:0005515(protein binding);GO:0005634(nucleus);GO:0005654(nucleoplasm);GO:0006325(chromatin organization);GO:0006334(nucleosome assembly);GO:0006338(chromatin remodeling);GO:0006352(DNA-templated transcription, initiation);GO:0006355(regulation of transcription, DNA-template…	NA	K11657	NA	remodeling and spacing factor 1 [Source:HGNC Symbol;Acc:HGNC:18118]	protein_coding	0.6883	1.08652	0.746994	0.432461	1.35547	0.401434	1.00098	0.381984	1.11226	1.11941	1.05503	1.34254	0.508763	0.757628	0.454678	1.02362	1.01183	9.87747	1.10961	1.22189	1.30661	1.11422	0.920106	1.21191	0.378878	-1.4002	0.000260786	0.0307136	down	yes
MSTRG.24158	TMEM255B	ENST00000375353;ENST00000488362	GO:0005515(protein binding);GO:0016020(membrane);GO:0016021(integral component of membrane);GO:0016021(integral component of membrane)	NA	NA	NA	transmembrane protein 255B [Source:HGNC Symbol;Acc:HGNC:28297]	protein_coding	2.27166	3.03029	1.5408	3.30582	0.798083	2.75516	2.07196	1.84043	1.8969	2.48919	0.768694	2.71793	3.49443	4.32553	1.85602	2.97639	1.26553	1.28978	0.79783	0.696149	2.70326	1.54925	0.826849	0.205327	2.04304	1.03071	0.000262291	0.0308179	up	yes
MSTRG.53706	ALS2CL	ENST00000318962;ENST00000415953	GO:0005096(GTPase activator activity);GO:0005515(protein binding);GO:0005737(cytoplasm);GO:0005829(cytosol);GO:0007032(endosome organization);GO:0042802(identical protein binding);GO:0043547(positive regulation of GTPase activity);GO:0043547(positive regulation of GTPase activity)	NA	NA	NA	ALS2 C-terminal like [Source:HGNC Symbol;Acc:HGNC:20605]	protein_coding	3.45289	7.51226	4.32485	11.665	3.9134	10.1819	5.42633	6.50067	2.50033	4.57279	7.03888	2.90328	12.5705	7.22198	5.15907	8.61634	4.11595	3.79091	3.31784	4.47526	2.69437	3.03374	4.34148	2.42384	1.83661	0.877045	0.000267413	0.0311668	up	no
MSTRG.14037	NKX6-2	ENST00000368592	GO:0000122(negative regulation of transcription by RNA polymerase II);GO:0000790(nuclear chromatin);GO:0000978(RNA polymerase II cis-regulatory region sequence-specific DNA binding);GO:0000981(DNA-binding transcription factor activity, RNA polymerase II-specific);GO:0001227(DNA-binding transcription repressor activity, RNA polymerase II-specific);GO:0003677(DNA binding);GO:0003700(DNA-binding tra…	NA	K09350	NA	NK6 homeobox 2 [Source:HGNC Symbol;Acc:HGNC:19321]	protein_coding	0.209814	0.208675	0.410678	0.156672	0.220631	0.255597	0.205175	0.397312	0.278046	0.36747	0.089988	0.21057	0.450778	0.123929	0.196702	0.3171	0.115219	0.0661472	0.0868363	0.16832	0.1643	0.071953	0.310454	0.0805648	1.92666	0.946101	0.000271486	0.0315595	up	no
MSTRG.72062	BET1	ENST00000222547;ENST00000457139;ENST00000425626;ENST00000433727	GO:0000138(Golgi trans cisterna);GO:0000139(Golgi membrane);GO:0005484(SNAP receptor activity);GO:0005515(protein binding);GO:0005783(endoplasmic reticulum);GO:0005789(endoplasmic reticulum membrane);GO:0005794(Golgi apparatus);GO:0006888(endoplasmic reticulum to Golgi vesicle-mediated transport);GO:0015031(protein transport);GO:0016020(membrane);GO:0016021(integral component of membrane);GO:0016…	04130(SNARE interactions in vesicular transport);04130(SNARE interactions in vesicular transport)	K08504	NA	Bet1 golgi vesicular membrane trafficking protein [Source:HGNC Symbol;Acc:HGNC:14562]	protein_coding	1.59626	1.49921	1.46793	0.41449	1.34022	0.604948	1.04861	0.861735	0.592638	1.3793	1.27504	1.04134	0.689366	2.12068	0.625614	1.01067	2.03351	2.97648	1.35708	1.62292	1.36738	2.464	1.42667	3.56642	0.522409	-0.936749	0.000273967	0.03176	down	no
MSTRG.22781	SOHLH2;CCDC169;CCDC169-SOHLH2	ENST00000379881;ENST00000379864;ENST00000317764;ENST00000511166;ENST00000239859	GO:0000790(nuclear chromatin);GO:0000981(DNA-binding transcription factor activity, RNA polymerase II-specific);GO:0001228(DNA-binding transcription activator activity, RNA polymerase II-specific);GO:0003677(DNA binding);GO:0005634(nucleus);GO:0005737(cytoplasm);GO:0006355(regulation of transcription, DNA-templated);GO:0006357(regulation of transcription by RNA polymerase II);GO:0007275(multicell…	NA	NA	NA	spermatogenesis and oogenesis specific basic helix-loop-helix 2 [Source:HGNC Symbol;Acc:HGNC:26026];coiled-coil domain containing 169 [Source:HGNC Symbol;Acc:HGNC:34361];CCDC169-SOHLH2 readthrough [Source:HGNC Symbol;Acc:HGNC:38866]	protein_coding	0.0202877	0.0520447	0.0198475	0.0125164	0.0194341	0.0257891	0.0165596	0.0516956	0.0266545	0.00445435	0.00395796	0	0.0129043	0.092802	0.0540489	0	0.107338	0.418585	0.121924	0.170001	0.032256	0.0252476	0.0309522	0.278176	0.174337	-2.52005	0.000274272	0.03176	down	yes
MSTRG.19794	ASIC1	ENST00000228468;ENST00000552438;ENST00000447966	GO:0001662(behavioral fear response);GO:0001975(response to amphetamine);GO:0005216(ion channel activity);GO:0005261(cation channel activity);GO:0005272(sodium channel activity);GO:0005515(protein binding);GO:0005794(Golgi apparatus);GO:0005886(plasma membrane);GO:0005887(integral component of plasma membrane);GO:0006811(ion transport);GO:0006812(cation transport);GO:0006814(sodium ion transport)…	04750(Inflammatory mediator regulation of TRP channels);04750(Inflammatory mediator regulation of TRP channels)	NA	NA	acid sensing ion channel subunit 1 [Source:HGNC Symbol;Acc:HGNC:100]	protein_coding	0.12407	0.186515	0.121967	0.138564	0.221278	0.155969	0.272402	0.120483	0.160684	0.321746	0.0499593	0.122486	0.154898	0.18992	0.0635055	0.141952	0.495537	0.741896	0.264039	0.42952	0.452792	0.125129	0.160285	0.249244	0.43626	-1.19674	0.000278679	0.0321872	down	yes
MSTRG.72978	CHCHD3	ENST00000481152;ENST00000262570;ENST00000448878	GO:0001401(SAM complex);GO:0005515(protein binding);GO:0005634(nucleus);GO:0005737(cytoplasm);GO:0005739(mitochondrion);GO:0005743(mitochondrial inner membrane);GO:0007007(inner mitochondrial membrane organization);GO:0008053(mitochondrial fusion);GO:0016020(membrane);GO:0016021(integral component of membrane);GO:0019902(phosphatase binding);GO:0042407(cristae formation);GO:0060090(molecular adap…	NA	K17563	NA	coiled-coil-helix-coiled-coil-helix domain containing 3 [Source:HGNC Symbol;Acc:HGNC:21906]	protein_coding	11.4994	9.73239	11.0467	4.75542	9.57263	5.59252	8.1199	5.99981	9.52413	8.55549	5.98746	7.07405	4.18975	6.72378	4.98335	7.17179	18.2062	13.4307	12.8156	10.7674	10.5672	8.34502	9.40739	11.0498	0.637115	-0.650374	0.000280157	0.0322935	down	no
MSTRG.9189	ETNK2	ENST00000429525;ENST00000367202;ENST00000444817;ENST00000422699;ENST00000367201;ENST00000367197;ENST00000422072	GO:0000166(nucleotide binding);GO:0001701(in utero embryonic development);GO:0001890(placenta development);GO:0004305(ethanolamine kinase activity);GO:0005515(protein binding);GO:0005524(ATP binding);GO:0005575(cellular_component);GO:0005829(cytosol);GO:0006629(lipid metabolic process);GO:0006646(phosphatidylethanolamine biosynthetic process);GO:0008150(biological_process);GO:0008654(phospholipid…	00564(Glycerophospholipid metabolism);00564(Glycerophospholipid metabolism)	K00894	EC:2.7.1.82	ethanolamine kinase 2 [Source:HGNC Symbol;Acc:HGNC:25575]	protein_coding	0.913416	0.529553	0.832029	0.528102	0.702158	0.406892	2.00744	0.912942	1.24776	1.44891	0.271722	1.01648	1.13934	1.53529	0.524806	0.322745	1.86509	1.67414	2.1838	1.55756	1.24574	4.02824	0.870985	3.46226	0.424554	-1.23598	0.000285468	0.0327377	down	yes
MSTRG.61979	NNT	ENST00000657172;ENST00000344920;ENST00000660752;ENST00000505678;ENST00000656666;ENST00000671668;ENST00000669601;ENST00000512422;ENST00000653251;ENST00000670904;ENST00000515208;ENST00000264663;ENST00000662525;ENST00000654405	GO:0000166(nucleotide binding);GO:0001933(negative regulation of protein phosphorylation);GO:0003957(NAD(P)+ transhydrogenase (B-specific) activity);GO:0005739(mitochondrion);GO:0005743(mitochondrial inner membrane);GO:0005746(mitochondrial respirasome);GO:0006099(tricarboxylic acid cycle);GO:0006740(NADPH regeneration);GO:0008746(NAD(P)+ transhydrogenase activity);GO:0010918(positive regulation …	00760(Nicotinate and nicotinamide metabolism);00760(Nicotinate and nicotinamide metabolism)	K00323	7.1.1.1;EC:1.6.1.2	nicotinamide nucleotide transhydrogenase [Source:HGNC Symbol;Acc:HGNC:7863]	protein_coding	3.12322	3.33809	2.2784	1.09008	2.29321	1.06534	2.75533	1.34484	2.13047	1.99405	2.00896	1.56597	1.27082	2.19239	1.43401	1.95491	3.95011	2.31738	3.06571	2.61111	2.31462	4.36617	2.66963	5.35409	0.597401	-0.743228	0.000288373	0.0329255	down	no
MSTRG.5614	USP1	ENST00000339950;ENST00000371146;ENST00000442679;ENST00000452143	GO:0001501(skeletal system development);GO:0004197(cysteine-type endopeptidase activity);GO:0004843(thiol-dependent ubiquitin-specific protease activity);GO:0005515(protein binding);GO:0005634(nucleus);GO:0005654(nucleoplasm);GO:0005829(cytosol);GO:0006281(DNA repair);GO:0006282(regulation of DNA repair);GO:0006508(proteolysis);GO:0006511(ubiquitin-dependent protein catabolic process);GO:0006974(…	03460(Fanconi anemia pathway);03460(Fanconi anemia pathway)	K11832	EC:3.4.19.12	ubiquitin specific peptidase 1 [Source:HGNC Symbol;Acc:HGNC:12607]	protein_coding	4.01908	3.75049	3.66283	1.7916	3.63603	1.34809	4.1232	1.46313	2.67651	3.03563	2.26113	2.50187	2.4	3.6609	1.50564	2.76463	4.57091	4.62439	4.52259	4.36503	4.59197	7.00255	3.83455	2.5474	0.618435	-0.693306	0.000292272	0.0332529	down	no
MSTRG.7386	GPR89B	ENST00000314163;ENST00000468618	GO:0000139(Golgi membrane);GO:0005244(voltage-gated ion channel activity);GO:0005794(Golgi apparatus);GO:0006811(ion transport);GO:0008308(voltage-gated anion channel activity);GO:0015031(protein transport);GO:0015698(inorganic anion transport);GO:0016020(membrane);GO:0016021(integral component of membrane);GO:0030217(T cell differentiation);GO:0032580(Golgi cisterna membrane);GO:0034220(ion tran…	NA	K22193	NA	G protein-coupled receptor 89B [Source:HGNC Symbol;Acc:HGNC:13840]	protein_coding	1.30937	1.33401	1.6848	1.20806	2.02048	0.795602	1.7302	0.757694	1.36118	1.11432	1.50891	1.28023	1.07769	1.34889	0.892443	1.07781	1.72654	1.63851	1.50647	2.20984	2.02561	4.96606	1.41274	2.79249	0.560822	-0.834386	0.000292596	0.0332529	down	no
MSTRG.59620	RAP1GDS1	ENST00000514139;ENST00000408927;ENST00000339360;ENST00000408900;ENST00000380158;ENST00000508213;ENST00000264572;ENST00000509501;ENST00000511212;ENST00000509011;ENST00000453712	GO:0005096(GTPase activator activity);GO:0005515(protein binding);GO:0005739(mitochondrion);GO:0005783(endoplasmic reticulum);GO:0005829(cytosol);GO:0014829(vascular smooth muscle contraction);GO:0031034(myosin filament assembly);GO:0032471(negative regulation of endoplasmic reticulum calcium ion concentration);GO:0043547(positive regulation of GTPase activity);GO:0051561(positive regulation of m…	NA	NA	NA	Rap1 GTPase-GDP dissociation stimulator 1 [Source:HGNC Symbol;Acc:HGNC:9859]	protein_coding	2.97626	3.22084	3.05274	1.31217	2.19799	1.09829	1.85543	1.18188	1.83186	2.03416	2.73545	2.27863	1.00418	1.50429	1.21123	1.73365	4.30584	2.69066	2.95011	3.11079	2.9167	3.832	2.62419	3.45845	0.60314	-0.729436	0.000300644	0.0339379	down	no
MSTRG.79741	IER5L	ENST00000372491	NA	NA	NA	NA	immediate early response 5 like [Source:HGNC Symbol;Acc:HGNC:23679]	protein_coding	6.99554	4.15915	5.26063	2.54008	4.98672	2.53974	3.58575	2.32426	5.00668	1.72579	2.93194	7.04796	1.9171	3.22793	2.19556	1.9935	9.58037	9.18783	7.5208	5.22137	7.52055	2.73089	5.88247	12.0129	0.489784	-1.02978	0.000302984	0.0341163	down	yes
MSTRG.43609	AAK1	ENST00000623317;ENST00000406297;ENST00000624900;ENST00000606389;ENST00000409085	GO:0000166(nucleotide binding);GO:0004672(protein kinase activity);GO:0004674(protein serine/threonine kinase activity);GO:0005112(Notch binding);GO:0005515(protein binding);GO:0005524(ATP binding);GO:0005737(cytoplasm);GO:0005829(cytosol);GO:0005886(plasma membrane);GO:0005905(clathrin-coated pit);GO:0006468(protein phosphorylation);GO:0006897(endocytosis);GO:0016020(membrane);GO:0016301(kinase …	NA	K08853	EC:2.7.11.1	AP2 associated kinase 1 [Source:HGNC Symbol;Acc:HGNC:19679]	protein_coding	2.96604	2.67941	2.42954	1.60917	2.8539	1.35284	1.79271	1.16243	1.93556	2.52305	1.71224	2.00324	1.4403	1.61681	1.4157	2.17353	3.0897	3.03157	2.74905	2.81171	3.01119	2.80156	2.43298	2.77054	0.697551	-0.519629	0.000303771	0.034162	down	no
MSTRG.7428	VPS45	ENST00000643611;ENST00000535106;ENST00000644704;ENST00000643970;ENST00000419023;ENST00000644510	GO:0000139(Golgi membrane);GO:0003674(molecular_function);GO:0005515(protein binding);GO:0005575(cellular_component);GO:0005768(endosome);GO:0005794(Golgi apparatus);GO:0006886(intracellular protein transport);GO:0006904(vesicle docking involved in exocytosis);GO:0007596(blood coagulation);GO:0010008(endosome membrane);GO:0015031(protein transport);GO:0016020(membrane);GO:0016021(integral compone…	04144(Endocytosis);04144(Endocytosis)	K12479	NA	vacuolar protein sorting 45 homolog [Source:HGNC Symbol;Acc:HGNC:14579]	protein_coding	1.29897	1.56351	1.43237	0.846472	1.51785	0.846627	1.40677	0.683787	1.17171	1.30904	1.30375	1.13972	0.658673	1.39495	0.674856	1.16067	1.68797	1.61337	1.43298	1.65856	1.59949	3.38177	1.2044	2.73842	0.60096	-0.73466	0.000305238	0.0342841	down	no
ENSG00000278662	GOLGA6L10	ENST00000610657	GO:0005794(Golgi apparatus)	NA	NA	NA	golgin A6 family like 10 [Source:HGNC Symbol;Acc:HGNC:37228]	protein_coding	0.712051	0.43621	0.564473	0.767691	0.422536	0.796088	0.427411	0.550443	0.438392	0.392962	0.534797	0.366435	0.171698	0.578426	0.581249	0.543207	0.322338	0.294408	0.458232	0.348203	0.332451	0.294231	0.252516	0.314047	1.58309	0.662742	0.000306705	0.0344058	up	no
MSTRG.79687	CERCAM	ENST00000613052;ENST00000447915;ENST00000372838;ENST00000372842;ENST00000420512;ENST00000411852;ENST00000612334;ENST00000420034	GO:0005515(protein binding);GO:0005783(endoplasmic reticulum);GO:0005788(endoplasmic reticulum lumen);GO:0005886(plasma membrane);GO:0007155(cell adhesion);GO:0007159(leukocyte cell-cell adhesion);GO:0042802(identical protein binding);GO:0042802(identical protein binding)	NA	NA	NA	cerebral endothelial cell adhesion molecule [Source:HGNC Symbol;Acc:HGNC:23723]	protein_coding	3.0648	1.95623	1.99247	1.75085	2.74872	1.09466	2.67118	1.15394	2.00835	1.42876	0.628872	3.81961	1.01357	4.29959	1.37218	1.57418	6.89769	11.9263	5.68749	5.15151	6.4875	2.79553	1.98007	0.626429	0.392009	-1.35104	0.000308423	0.0345037	down	yes
MSTRG.42075	APOB	ENST00000233242;ENST00000399256	GO:0001523(retinoid metabolic process);GO:0001701(in utero embryonic development);GO:0002224(toll-like receptor signaling pathway);GO:0005319(lipid transporter activity);GO:0005515(protein binding);GO:0005543(phospholipid binding);GO:0005576(extracellular region);GO:0005615(extracellular space);GO:0005737(cytoplasm);GO:0005769(early endosome);GO:0005783(endoplasmic reticulum);GO:0005788(endoplasm…	04975(Fat digestion and absorption);04977(Vitamin digestion and absorption);04979(Cholesterol metabolism);04979(Cholesterol metabolism)	NA	NA	apolipoprotein B [Source:HGNC Symbol;Acc:HGNC:603]	protein_coding	0.011624	0.0293334	0.0627388	0.0224643	0.0113345	0.0123983	0.00519395	0	0.026764	0.0146619	0.00958605	0.0181522	0.00910894	0	0	0.00879087	0.00372071	0.0650225	0.0385461	0.0322551	0.0324217	1.38816	0.00360739	0	0.0774274	-3.69101	0.000308626	0.0345037	down	yes
MSTRG.8375	FMO4	ENST00000367749	GO:0004497(monooxygenase activity);GO:0004499(N,N-dimethylaniline monooxygenase activity);GO:0005515(protein binding);GO:0005783(endoplasmic reticulum);GO:0005789(endoplasmic reticulum membrane);GO:0016020(membrane);GO:0016021(integral component of membrane);GO:0016491(oxidoreductase activity);GO:0031090(organelle membrane);GO:0042737(drug catabolic process);GO:0043231(intracellular membrane-boun…	00982(Drug metabolism - cytochrome P450)	NA	NA	flavin containing dimethylaniline monoxygenase 4 [Source:HGNC Symbol;Acc:HGNC:3772]	protein_coding	0.820617	1.36665	1.52223	0.413707	0.969611	0.311348	1.12645	0.456029	0.631669	1.32113	0.521655	0.292952	0.509585	1.26076	0.409304	0.695501	0.9443	1.18463	1.95237	1.31075	1.3322	2.61337	1.03863	2.52762	0.489357	-1.03104	0.000308904	0.0345037	down	yes
MSTRG.29499	GOLGA6L9	ENST00000618348	GO:0005515(protein binding);GO:0005794(Golgi apparatus)	NA	NA	NA	golgin A6 family like 9 [Source:HGNC Symbol;Acc:HGNC:37229]	protein_coding	3.54586	1.70769	1.47762	2.66187	1.66089	1.61235	1.77117	1.80526	1.90216	2.40503	2.76498	1.59129	0.757213	2.43115	0.848944	2.57016	1.01002	0.479638	1.95647	1.79873	0.944143	1.21416	1.12166	1.15505	1.62779	0.702918	0.00030921	0.0345037	up	no
MSTRG.7666	SPRR1B;SPRR1A	ENST00000307098;ENST00000368762	GO:0001533(cornified envelope);GO:0005198(structural molecule activity);GO:0005737(cytoplasm);GO:0005829(cytosol);GO:0008544(epidermis development);GO:0018149(peptide cross-linking);GO:0030216(keratinocyte differentiation);GO:0031424(keratinization);GO:0070268(cornification);GO:0005515(protein binding);GO:0030280(structural constituent of skin epidermis);GO:0070268(cornification)	NA	NA	NA	small proline rich protein 1B [Source:HGNC Symbol;Acc:HGNC:11260];small proline rich protein 1A [Source:HGNC Symbol;Acc:HGNC:11259]	protein_coding	0	0.094526	0.00567121	0	0.0597259	0.0854297	0	0	0	0	0	0	0	0.00599072	0.057347	0	0.243486	0	4.05377	1.5458	0	0.0907911	0	0.0481142	0.0258018	-5.27639	0.000309501	0.0345037	down	yes
MSTRG.31965	GOT2	ENST00000245206	GO:0003723(RNA binding);GO:0003824(catalytic activity);GO:0004069(L-aspartate:2-oxoglutarate aminotransferase activity);GO:0005543(phospholipid binding);GO:0005739(mitochondrion);GO:0005743(mitochondrial inner membrane);GO:0005759(mitochondrial matrix);GO:0005886(plasma membrane);GO:0006094(gluconeogenesis);GO:0006103(2-oxoglutarate metabolic process);GO:0006107(oxaloacetate metabolic process);GO…	00220(Arginine biosynthesis);00250(Alanine, aspartate and glutamate metabolism);00270(Cysteine and methionine metabolism);00330(Arginine and proline metabolism);00350(Tyrosine metabolism);00360(Phenylalanine metabolism);00400(Phenylalanine, tyrosine and tryptophan biosynthesis);04975(Fat digestion and absorption)	K14455	EC:2.6.1.1	glutamic-oxaloacetic transaminase 2 [Source:HGNC Symbol;Acc:HGNC:4433]	protein_coding	6.43623	5.44548	5.74407	4.09556	5.37545	2.88059	7.69086	4.14747	5.09121	5.61819	8.07357	8.03717	2.9488	5.94479	2.94389	5.658	10.7108	11.006	9.99337	6.72759	5.99933	12.1006	7.12631	8.7261	0.594911	-0.749255	0.000309953	0.0345113	down	no
MSTRG.34359	TAOK1	ENST00000261716;ENST00000583121	GO:0000166(nucleotide binding);GO:0000187(activation of MAPK activity);GO:0000226(microtubule cytoskeleton organization);GO:0004672(protein kinase activity);GO:0004674(protein serine/threonine kinase activity);GO:0005515(protein binding);GO:0005524(ATP binding);GO:0005737(cytoplasm);GO:0005829(cytosol);GO:0006281(DNA repair);GO:0006468(protein phosphorylation);GO:0006915(apoptotic process);GO:000…	04010(MAPK signaling pathway);04010(MAPK signaling pathway)	K04429	EC:2.7.11.1	TAO kinase 1 [Source:HGNC Symbol;Acc:HGNC:29259]	protein_coding	3.03727	3.10529	2.69734	1.80465	3.14378	1.25116	1.79932	1.28577	2.25605	2.44074	1.58209	2.02872	1.21769	2.45303	1.06158	1.43599	3.50256	2.86686	3.22609	3.41941	2.96446	3.40984	2.39599	3.62544	0.641473	-0.64054	0.000310393	0.0345175	down	no
MSTRG.35405	HOXB3;HOXB4;HOXB6;HOXB5	ENST00000311626;ENST00000332503;ENST00000498678;ENST00000225648;ENST00000239151;ENST00000460160;ENST00000484302;ENST00000489475;ENST00000465120;ENST00000470495;ENST00000471459;ENST00000472863	GO:0000122(negative regulation of transcription by RNA polymerase II);GO:0000790(nuclear chromatin);GO:0000978(RNA polymerase II cis-regulatory region sequence-specific DNA binding);GO:0000981(DNA-binding transcription factor activity, RNA polymerase II-specific);GO:0001228(DNA-binding transcription activator activity, RNA polymerase II-specific);GO:0001525(angiogenesis);GO:0002244(hematopoietic …	NA	K09303;K09304;K09306;K09305	NA	homeobox B3 [Source:HGNC Symbol;Acc:HGNC:5114];homeobox B4 [Source:HGNC Symbol;Acc:HGNC:5115];homeobox B6 [Source:HGNC Symbol;Acc:HGNC:5117];homeobox B5 [Source:HGNC Symbol;Acc:HGNC:5116]	protein_coding	0.490456	0.52189	0.639941	0.59919	0.84026	0.527043	0.924911	0.447056	0.674107	0.756665	0.2677	1.00788	0.440412	0.817586	0.234061	0.413683	0.71174	1.09309	1.92185	1.09543	1.25233	3.92075	1.21284	0.235505	0.419576	-1.253	0.000318586	0.0351671	down	yes
MSTRG.7374	PRKAB2	ENST00000254101	GO:0004679(AMP-activated protein kinase activity);GO:0005515(protein binding);GO:0005634(nucleus);GO:0005654(nucleoplasm);GO:0005737(cytoplasm);GO:0005829(cytosol);GO:0006468(protein phosphorylation);GO:0006629(lipid metabolic process);GO:0006631(fatty acid metabolic process);GO:0006633(fatty acid biosynthetic process);GO:0006853(carnitine shuttle);GO:0007050(cell cycle arrest);GO:0007165(signal …	04068(FoxO signaling pathway);04152(AMPK signaling pathway);04211(Longevity regulating pathway);04213(Longevity regulating pathway - multiple species);04371(Apelin signaling pathway);04530(Tight junction);04710(Circadian rhythm);04714(Thermogenesis);04910(Insulin signaling pathway);04920(Adipocytokine signaling pathway);04921(Oxytocin signaling pathway);04922(Glucagon signaling pathway);04931(Ins…	NA	NA	protein kinase AMP-activated non-catalytic subunit beta 2 [Source:HGNC Symbol;Acc:HGNC:9379]	protein_coding	2.57234	2.29746	2.48946	1.43838	2.14036	1.22595	2.63863	1.25966	1.51815	2.85805	2.14011	2.66171	1.75075	2.35644	1.08792	1.82635	2.26229	4.39051	3.35537	3.48714	2.87724	5.46842	1.95825	2.80981	0.606217	-0.722094	0.000323238	0.0354626	down	no
MSTRG.1720	CHM	ENST00000357749;ENST00000615443	GO:0004663(Rab geranylgeranyltransferase activity);GO:0005092(GDP-dissociation inhibitor activity);GO:0005096(GTPase activator activity);GO:0005515(protein binding);GO:0005634(nucleus);GO:0005737(cytoplasm);GO:0005829(cytosol);GO:0005968(Rab-protein geranylgeranyltransferase complex);GO:0006612(protein targeting to membrane);GO:0006886(intracellular protein transport);GO:0007264(small GTPase medi…	NA	NA	NA	CHM Rab escort protein [Source:HGNC Symbol;Acc:HGNC:1940]	protein_coding	1.46899	1.45049	1.24155	0.805704	1.15564	0.606343	1.31254	0.686797	1.19269	1.5461	1.26591	0.973924	0.965421	1.04472	1.02766	1.39714	1.47578	1.81293	1.6956	1.85636	1.68118	1.40882	1.27995	3.26784	0.626504	-0.674605	0.000325737	0.0356495	down	no
MSTRG.76710	CCN4	ENST00000250160;ENST00000220856	GO:0001649(osteoblast differentiation);GO:0005178(integrin binding);GO:0005515(protein binding);GO:0005520(insulin-like growth factor binding);GO:0005576(extracellular region);GO:0005615(extracellular space);GO:0005737(cytoplasm);GO:0005829(cytosol);GO:0007155(cell adhesion);GO:0007165(signal transduction);GO:0007267(cell-cell signaling);GO:0008201(heparin binding);GO:0014911(positive regulation …	04310(Wnt signaling pathway);04310(Wnt signaling pathway)	K22471	NA	cellular communication network factor 4 [Source:HGNC Symbol;Acc:HGNC:12769]	protein_coding	1.29182	0.742551	0.953804	0.232402	0.774539	0.883778	2.10551	0.419586	0.671771	0.700101	0.707223	1.59858	0.356943	0.745169	0.433319	0.447333	2.21764	3.96075	3.0912	1.66286	2.97689	1.50884	0.786655	0.357447	0.394403	-1.34226	0.000332038	0.0360247	down	yes
MSTRG.8482	PAPPA2	ENST00000367662	GO:0001558(regulation of cell growth);GO:0005515(protein binding);GO:0005576(extracellular region);GO:0005829(cytosol);GO:0006508(proteolysis);GO:0008233(peptidase activity);GO:0008237(metallopeptidase activity);GO:0008270(zinc ion binding);GO:0009651(response to salt stress);GO:0016324(apical plasma membrane);GO:0016787(hydrolase activity);GO:0044267(cellular protein metabolic process);GO:004687…	NA	K08647	EC:3.4.24.-	pappalysin 2 [Source:HGNC Symbol;Acc:HGNC:14615]	protein_coding	0.0274814	0.00684568	0.396832	0.544705	2.39971	0.182362	0.0146404	0.0241125	0.00919273	0.00610848	0.0181638	0	0.0104731	0	0.0334983	0.0217249	0.00153526	0.0136363	0.00464269	0.0374574	0.0318536	0	0.016601	0.0122013	15.67	3.96994	0.000332096	0.0360247	up	yes
MSTRG.24401	OXA1L	ENST00000358043;ENST00000285848;ENST00000612549;ENST00000431881	GO:0005515(protein binding);GO:0005739(mitochondrion);GO:0005743(mitochondrial inner membrane);GO:0005746(mitochondrial respirasome);GO:0005759(mitochondrial matrix);GO:0009060(aerobic respiration);GO:0016020(membrane);GO:0016021(integral component of membrane);GO:0031305(integral component of mitochondrial inner membrane);GO:0031966(mitochondrial membrane);GO:0032592(integral component of mitoch…	03060(Protein export);03060(Protein export)	K03217	NA	OXA1L mitochondrial inner membrane protein [Source:HGNC Symbol;Acc:HGNC:8526]	protein_coding	5.94834	6.32605	4.87748	1.92399	4.55989	2.84386	3.70966	2.21554	3.69654	4.94514	3.08394	3.8824	3.2199	7.18418	3.01952	3.52736	6.05324	8.52048	4.91195	6.84448	5.55387	8.30199	5.2764	7.26383	0.616048	-0.698886	0.000332376	0.0360247	down	no
MSTRG.33556	KRBA2;RPL26	ENST00000331336;ENST00000578812;ENST00000647210;ENST00000643221;ENST00000584343;ENST00000584164;ENST00000582556;ENST00000583011;ENST00000649935;ENST00000648839;ENST00000396267;ENST00000584441	GO:0003676(nucleic acid binding);GO:0005515(protein binding);GO:0006355(regulation of transcription, DNA-templated);GO:0015074(DNA integration);GO:0000184(nuclear-transcribed mRNA catabolic process, nonsense-mediated decay);GO:0002181(cytoplasmic translation);GO:0003723(RNA binding);GO:0003735(structural constituent of ribosome);GO:0005654(nucleoplasm);GO:0005730(nucleolus);GO:0005737(cytoplasm);…	03010(Ribosome);03010(Ribosome)	K02898	NA	KRAB-A domain containing 2 [Source:HGNC Symbol;Acc:HGNC:26989];ribosomal protein L26 [Source:HGNC Symbol;Acc:HGNC:10327]	protein_coding	11.4443	8.60645	10.5775	2.82854	8.26454	3.46538	4.5862	3.64949	5.71551	7.95057	3.66052	3.78824	2.72384	10.1653	4.23835	6.11625	16.3456	9.5329	10.7118	11.2615	10.787	9.11514	9.13398	10.8169	0.557444	-0.843102	0.000337783	0.0364347	down	no
MSTRG.16523	TENM4	ENST00000278550;ENST00000533525;ENST00000533074;ENST00000527736	GO:0001702(gastrulation with mouth forming second);GO:0005515(protein binding);GO:0005634(nucleus);GO:0005737(cytoplasm);GO:0005886(plasma membrane);GO:0005887(integral component of plasma membrane);GO:0007157(heterophilic cell-cell adhesion via plasma membrane cell adhesion molecules);GO:0007165(signal transduction);GO:0007275(multicellular organism development);GO:0016020(membrane);GO:0016021(i…	NA	NA	NA	teneurin transmembrane protein 4 [Source:HGNC Symbol;Acc:HGNC:29945]	protein_coding	0.463838	0.398183	0.404622	0.250386	0.538318	0.197835	0.493985	0.18118	0.582828	0.599108	2.90925	1.52947	0.282742	0.356366	0.340587	0.714893	3.22549	14.2119	0.903999	0.817794	0.863899	0.639468	0.683994	0.260224	0.237046	-2.07676	0.000338454	0.0364632	down	yes
MSTRG.19758	SPATS2	ENST00000552918;ENST00000548377;ENST00000547865;ENST00000321898;ENST00000549298;ENST00000549179;ENST00000550997;ENST00000553127;ENST00000549538;ENST00000548777;ENST00000551540	GO:0003723(RNA binding);GO:0005515(protein binding);GO:0005737(cytoplasm);GO:0005829(cytosol);GO:0005829(cytosol)	NA	NA	NA	spermatogenesis associated serine rich 2 [Source:HGNC Symbol;Acc:HGNC:18650]	protein_coding	1.64568	1.45397	1.26035	0.69876	1.01669	1.10858	1.43743	0.976459	1.38218	1.01259	0.558761	0.78933	0.823025	1.04781	1.20444	1.42046	1.73743	2.13221	1.61014	1.47428	1.98872	2.67084	1.70128	1.66143	0.595491	-0.747849	0.000344219	0.0368997	down	no
MSTRG.2536	SLC9A6	ENST00000674809;ENST00000370698;ENST00000370701;ENST00000637234;ENST00000370695;ENST00000630721;ENST00000627534;ENST00000637195;ENST00000636347;ENST00000638078	GO:0005768(endosome);GO:0005769(early endosome);GO:0005770(late endosome);GO:0005789(endoplasmic reticulum membrane);GO:0005886(plasma membrane);GO:0006811(ion transport);GO:0006812(cation transport);GO:0006814(sodium ion transport);GO:0006885(regulation of pH);GO:0010008(endosome membrane);GO:0015297(antiporter activity);GO:0015299(solute:proton antiporter activity);GO:0015385(sodium:proton anti…	04260(Cardiac muscle contraction);04260(Cardiac muscle contraction)	K12041	NA	solute carrier family 9 member A6 [Source:HGNC Symbol;Acc:HGNC:11079]	protein_coding	0.682052	0.706599	0.794817	0.341603	0.679435	0.283553	0.556801	0.305851	0.471476	0.487061	0.52754	0.556163	0.384095	0.526177	0.526396	0.589968	0.705656	0.788322	0.807782	0.958943	0.687049	0.709208	0.646819	1.21224	0.646069	-0.63024	0.000344352	0.0368997	down	no
MSTRG.1669	BRWD3	ENST00000373275	GO:0005515(protein binding);GO:0005634(nucleus);GO:0006357(regulation of transcription by RNA polymerase II);GO:0007010(cytoskeleton organization);GO:0008360(regulation of cell shape)	NA	K11798	NA	bromodomain and WD repeat domain containing 3 [Source:HGNC Symbol;Acc:HGNC:17342]	protein_coding	2.06805	1.534	1.58307	0.821329	1.86118	1.06009	1.65613	0.793488	1.4448	1.83096	2.13266	1.86309	0.976793	1.56386	0.688181	1.12051	2.02866	2.07781	1.99146	2.59886	1.80298	2.76221	1.63151	7.26355	0.518982	-0.946245	0.000346776	0.0370712	down	no
MSTRG.37201	FAM210A	ENST00000651643;ENST00000592976;ENST00000591269;ENST00000589346;ENST00000402563;ENST00000322247	GO:0003674(molecular_function);GO:0005737(cytoplasm);GO:0005739(mitochondrion);GO:0008150(biological_process);GO:0016020(membrane);GO:0016021(integral component of membrane);GO:0016021(integral component of membrane)	NA	NA	NA	family with sequence similarity 210 member A [Source:HGNC Symbol;Acc:HGNC:28346]	protein_coding	1.29795	1.20282	1.18432	0.380611	0.914332	0.448678	0.820697	0.439637	0.819284	0.757984	0.693042	0.678467	0.570556	0.72082	0.343804	0.594487	2.16242	1.39168	1.08991	1.21479	1.27249	0.974638	0.978422	0.975356	0.589852	-0.761576	0.000347313	0.0370712	down	no
MSTRG.77151	PLGRKT	ENST00000223864	GO:0005515(protein binding);GO:0005886(plasma membrane);GO:0005887(integral component of plasma membrane);GO:0006935(chemotaxis);GO:0006954(inflammatory response);GO:0010756(positive regulation of plasminogen activation);GO:0016020(membrane);GO:0016021(integral component of membrane)	NA	NA	NA	plasminogen receptor with a C-terminal lysine [Source:HGNC Symbol;Acc:HGNC:23633]	protein_coding	1.79458	1.94111	1.14248	1.25272	1.76937	1.00153	0.978828	0.441516	1.50546	1.02153	1.34139	0.795581	0.606212	1.06405	0.76455	1.81757	1.70516	1.99713	1.95397	2.16794	2.14966	3.3937	1.80028	2.43942	0.546323	-0.872174	0.000350158	0.0372767	down	no
MSTRG.34588	PSMD11	ENST00000457654;ENST00000261712;ENST00000579451;ENST00000649012;ENST00000580904;ENST00000578213	GO:0000165(MAPK cascade);GO:0000209(protein polyubiquitination);GO:0000502(proteasome complex);GO:0002223(stimulatory C-type lectin receptor signaling pathway);GO:0002479(antigen processing and presentation of exogenous peptide antigen via MHC class I, TAP-dependent);GO:0005198(structural molecule activity);GO:0005515(protein binding);GO:0005576(extracellular region);GO:0005634(nucleus);GO:000565…	03050(Proteasome);05169(Epstein-Barr virus infection);05169(Epstein-Barr virus infection)	NA	NA	proteasome 26S subunit, non-ATPase 11 [Source:HGNC Symbol;Acc:HGNC:9556]	protein_coding	2.11441	2.30566	2.48451	1.43481	2.08309	1.68131	2.80619	1.40968	2.57674	1.98137	1.64906	1.76025	1.33885	1.95497	1.51124	1.82935	3.33956	2.52907	2.94016	2.27763	2.61157	3.98758	2.38235	2.6731	0.679862	-0.556687	0.000351194	0.0373266	down	no
MSTRG.23595	GPC6	ENST00000377047;ENST00000617456	GO:0001523(retinoid metabolic process);GO:0005515(protein binding);GO:0005576(extracellular region);GO:0005615(extracellular space);GO:0005634(nucleus);GO:0005796(Golgi lumen);GO:0005886(plasma membrane);GO:0006024(glycosaminoglycan biosynthetic process);GO:0006027(glycosaminoglycan catabolic process);GO:0009966(regulation of signal transduction);GO:0009986(cell surface);GO:0016020(membrane);GO:0…	NA	NA	NA	glypican 6 [Source:HGNC Symbol;Acc:HGNC:4454]	protein_coding	0.18484	0.180718	0.733135	0.197329	0.436617	0.235723	0.152844	0.0548213	0.153166	0.0815076	0.108324	0.820354	0.125708	0.28698	0.102768	0.246344	0.777425	1.57579	1.23509	1.01602	1.99923	0.199391	0.2399	0.0774321	0.287993	-1.79589	0.000358504	0.0376845	down	yes
MSTRG.59993	NDST3	ENST00000296499	GO:0000139(Golgi membrane);GO:0003824(catalytic activity);GO:0005575(cellular_component);GO:0005794(Golgi apparatus);GO:0008146(sulfotransferase activity);GO:0008152(metabolic process);GO:0015012(heparan sulfate proteoglycan biosynthetic process);GO:0015014(heparan sulfate proteoglycan biosynthetic process, polysaccharide chain biosynthetic process);GO:0015016([heparan sulfate]-glucosamine N-sulf…	00534(Glycosaminoglycan biosynthesis - heparan sulfate / heparin)	K02578	2.8.2.-;EC:3.1.1.-	N-deacetylase and N-sulfotransferase 3 [Source:HGNC Symbol;Acc:HGNC:7682]	protein_coding	0.1426	0.0157931	0.0201586	0.0129427	0.0548718	0.0136118	0.0667883	0.10793	0.105344	0.0367688	0.0265979	0.0124141	0.049851	0.0204378	0.0354115	0.0282844	0.0969331	0.0203882	0.013187	0.0302357	0.0374386	1.9348	0.0729991	0.0150048	0.1688	-2.56661	0.000359337	0.037717	down	yes
MSTRG.65816	ATXN1	ENST00000436367;ENST00000244769;ENST00000642969	GO:0000122(negative regulation of transcription by RNA polymerase II);GO:0003677(DNA binding);GO:0003723(RNA binding);GO:0005515(protein binding);GO:0005634(nucleus);GO:0005654(nucleoplasm);GO:0005730(nucleolus);GO:0005737(cytoplasm);GO:0005829(cytosol);GO:0006355(regulation of transcription, DNA-templated);GO:0006396(RNA processing);GO:0007399(nervous system development);GO:0007420(brain develop…	NA	NA	NA	ataxin 1 [Source:HGNC Symbol;Acc:HGNC:10548]	protein_coding	1.10911	1.54663	0.688885	0.65495	1.03682	0.409554	1.31758	0.505064	0.623162	1.13464	1.25746	0.64201	0.54951	0.770361	0.622164	1.49448	1.11564	1.84883	2.26211	1.48252	1.77952	0.985924	1.0498	3.39654	0.515858	-0.954955	0.000363738	0.0380011	down	no
MSTRG.16446	ACER3	ENST00000534206;ENST00000532485;ENST00000533873;ENST00000526597	GO:0000139(Golgi membrane);GO:0005509(calcium ion binding);GO:0005783(endoplasmic reticulum);GO:0005789(endoplasmic reticulum membrane);GO:0005794(Golgi apparatus);GO:0006629(lipid metabolic process);GO:0006665(sphingolipid metabolic process);GO:0006672(ceramide metabolic process);GO:0006954(inflammatory response);GO:0008270(zinc ion binding);GO:0008284(positive regulation of cell population prol…	00600(Sphingolipid metabolism);00600(Sphingolipid metabolism)	K04711	EC:3.5.1.-	alkaline ceramidase 3 [Source:HGNC Symbol;Acc:HGNC:16066]	protein_coding	1.76554	1.85839	0.797554	0.308149	1.1539	0.1988	0.232107	0.280469	0.221061	0.574445	0.688513	0.471991	0.227266	0.594822	0.296617	1.05094	1.04574	15.5635	0.663665	0.431555	0.355429	1.37038	0.679066	0.749874	0.256974	-1.9603	0.000368892	0.0383416	down	yes
MSTRG.4434	CSMD2	ENST00000373381;ENST00000373380;ENST00000338325;ENST00000373388;ENST00000373377	GO:0005886(plasma membrane);GO:0016020(membrane);GO:0016021(integral component of membrane);GO:0016021(integral component of membrane)	NA	K17495	NA	CUB and Sushi multiple domains 2 [Source:HGNC Symbol;Acc:HGNC:19290]	protein_coding	0.0295377	0.0856662	0.0919592	0.0454219	0.0781809	0.137213	0.166209	0.022278	0.0591655	0.0539378	0.0110892	0.165749	0.0330971	0.19525	0.113891	0.035761	0.209706	0.517287	0.265363	0.104217	0.454439	0.569814	0.0587512	0.0644531	0.295096	-1.76075	0.000368894	0.0383416	down	yes
MSTRG.25715	SMOC1	ENST00000381280;ENST00000361956	GO:0001654(eye development);GO:0005509(calcium ion binding);GO:0005515(protein binding);GO:0005576(extracellular region);GO:0005604(basement membrane);GO:0007275(multicellular organism development);GO:0030154(cell differentiation);GO:0045667(regulation of osteoblast differentiation);GO:0046872(metal ion binding);GO:0050840(extracellular matrix binding);GO:0060173(limb development);GO:0060173(limb…	NA	NA	NA	SPARC related modular calcium binding 1 [Source:HGNC Symbol;Acc:HGNC:20318]	protein_coding	0.21146	0.0504534	0.522515	0.0365643	0.340249	0.0928086	0.354445	0.094534	0.408593	0.197846	0.027046	0.0300711	0.0894075	0.215506	0.111509	0.156504	0.681042	0.163836	0.39629	0.223078	1.47287	2.064	0.246003	0.110945	0.274307	-1.86614	0.000369133	0.0383416	down	yes
MSTRG.37561	SLC39A6	ENST00000269187;ENST00000590986;ENST00000440549;ENST00000586829	GO:0005385(zinc ion transmembrane transporter activity);GO:0005783(endoplasmic reticulum);GO:0005886(plasma membrane);GO:0005887(integral component of plasma membrane);GO:0006811(ion transport);GO:0006829(zinc ion transport);GO:0006882(cellular zinc ion homeostasis);GO:0009986(cell surface);GO:0016020(membrane);GO:0016021(integral component of membrane);GO:0030001(metal ion transport);GO:0031258(…	NA	K14712	NA	solute carrier family 39 member 6 [Source:HGNC Symbol;Acc:HGNC:18607]	protein_coding	6.58004	5.60103	8.45133	2.05932	5.99219	1.48011	3.87288	2.56066	3.69974	4.75984	3.5162	4.00175	2.00298	4.43609	3.17682	3.13766	12.3574	8.32265	5.83745	5.27379	6.02803	7.93991	4.49915	9.22817	0.549104	-0.864848	0.000371334	0.0384477	down	no
MSTRG.16493	INTS4	ENST00000527522;ENST00000534064;ENST00000535943;ENST00000529807	GO:0005515(protein binding);GO:0005634(nucleus);GO:0005654(nucleoplasm);GO:0005730(nucleolus);GO:0016180(snRNA processing);GO:0032039(integrator complex);GO:0042795(snRNA transcription by RNA polymerase II);GO:0042795(snRNA transcription by RNA polymerase II)	NA	K13141	NA	integrator complex subunit 4 [Source:HGNC Symbol;Acc:HGNC:25048]	protein_coding	1.92822	2.12327	2.26109	0.993188	2.22686	1.29286	2.1325	1.19351	1.86033	2.64414	1.8479	1.9926	1.30677	2.6075	1.30534	2.22415	2.66561	22.4327	2.34384	2.07613	2.27993	2.91511	1.81019	1.98805	0.388718	-1.36321	0.000372356	0.0384914	down	yes
MSTRG.17077	MMP1	ENST00000315274	GO:0004175(endopeptidase activity);GO:0004222(metalloendopeptidase activity);GO:0004252(serine-type endopeptidase activity);GO:0005576(extracellular region);GO:0006508(proteolysis);GO:0008233(peptidase activity);GO:0008237(metallopeptidase activity);GO:0008270(zinc ion binding);GO:0016032(viral process);GO:0016787(hydrolase activity);GO:0019221(cytokine-mediated signaling pathway);GO:0022617(extr…	03320(PPAR signaling pathway);04657(IL-17 signaling pathway);04926(Relaxin signaling pathway);05200(Pathways in cancer);05219(Bladder cancer);05323(Rheumatoid arthritis)	K01388	EC:3.4.24.7	matrix metallopeptidase 1 [Source:HGNC Symbol;Acc:HGNC:7155]	protein_coding	0.297615	0.090243	0.16577	0.021851	3.20065	0.375476	0.504348	0	0.147195	0.055151	4.05973	0.919342	0	0.021771	0.099243	0.66416	2.43457	0.524023	10.4401	0.46195	0.312646	64.4985	0.062349	1.03591	0.0665823	-3.90872	0.00037272	0.0384914	down	yes
MSTRG.46706	EEF1B2	ENST00000392222;ENST00000445505;ENST00000392221;ENST00000236957	GO:0003746(translation elongation factor activity);GO:0005085(guanyl-nucleotide exchange factor activity);GO:0005515(protein binding);GO:0005737(cytoplasm);GO:0005783(endoplasmic reticulum);GO:0005829(cytosol);GO:0005853(eukaryotic translation elongation factor 1 complex);GO:0006412(translation);GO:0006414(translational elongation);GO:0006414(translational elongation)	NA	K03232	NA	eukaryotic translation elongation factor 1 beta 2 [Source:HGNC Symbol;Acc:HGNC:3208]	protein_coding	21.3716	16.1343	16.8472	5.68927	18.0198	7.0952	9.5223	5.42743	10.5946	15.7347	9.45025	12.1236	5.6542	14.775	7.19293	10.0716	35.1785	14.2958	16.4883	19.6447	21.3645	11.4697	17.7042	32.9635	0.549065	-0.86495	0.000378685	0.0389444	down	no
MSTRG.3089	ANKRD65	ENST00000454272;ENST00000442470;ENST00000520296;ENST00000537107;ENST00000427211	GO:0005515(protein binding);GO:0005515(protein binding)	NA	NA	NA	ankyrin repeat domain 65 [Source:HGNC Symbol;Acc:HGNC:42950]	protein_coding	5.08945	4.46294	4.45019	6.29344	3.33661	2.47181	3.51518	12.8977	3.64528	9.59745	4.59325	14.4921	3.56148	7.2585	5.93953	4.80789	2.30937	2.31504	8.30482	1.51554	1.5131	3.50152	2.03929	1.37572	2.10744	1.07549	0.000379251	0.0389444	up	yes
MSTRG.35765	DHX40	ENST00000251241;ENST00000584385;ENST00000538926	GO:0000166(nucleotide binding);GO:0003676(nucleic acid binding);GO:0003723(RNA binding);GO:0003724(RNA helicase activity);GO:0004386(helicase activity);GO:0005515(protein binding);GO:0005524(ATP binding);GO:0016787(hydrolase activity);GO:0016787(hydrolase activity)	NA	K18711	EC:3.6.4.13	DEAH-box helicase 40 [Source:HGNC Symbol;Acc:HGNC:18018]	protein_coding	4.97957	3.39415	3.55883	1.35366	3.56475	1.28905	3.01826	1.56644	2.39416	3.29772	3.35218	2.97544	1.54147	3.12896	2.33022	2.01165	4.94905	3.58573	4.93551	4.44445	3.67711	5.26619	2.81844	7.53403	0.587959	-0.766213	0.000379321	0.0389444	down	no
MSTRG.64924	SPDL1	ENST00000265295;ENST00000508247;ENST00000629457;ENST00000515224;ENST00000513795;ENST00000513941;ENST00000506574	GO:0000132(establishment of mitotic spindle orientation);GO:0000775(chromosome, centromeric region);GO:0000776(kinetochore);GO:0000777(condensed chromosome kinetochore);GO:0000922(spindle pole);GO:0000940(condensed chromosome outer kinetochore);GO:0005515(protein binding);GO:0005634(nucleus);GO:0005694(chromosome);GO:0005737(cytoplasm);GO:0005815(microtubule organizing center);GO:0005829(cytosol)…	NA	NA	NA	spindle apparatus coiled-coil protein 1 [Source:HGNC Symbol;Acc:HGNC:26010]	protein_coding	0.625451	0.419851	0.301516	0.139572	0.341285	0.165106	0.286781	0.192844	0.400029	0.317	0.223351	0.18778	0.207933	0.396241	0.144509	0.240826	0.54335	0.788862	0.395571	0.33984	0.508353	0.864318	0.35205	0.439145	0.542371	-0.882648	0.00038569	0.0394226	down	no
MSTRG.30284	FLYWCH1	ENST00000573525;ENST00000570425;ENST00000416288;ENST00000571983;ENST00000253928;ENST00000573564;ENST00000344592	GO:0003677(DNA binding);GO:0005515(protein binding);GO:0005634(nucleus);GO:0005654(nucleoplasm);GO:0005829(cytosol);GO:0016604(nuclear body);GO:0046872(metal ion binding);GO:0046872(metal ion binding)	NA	NA	NA	FLYWCH-type zinc finger 1 [Source:HGNC Symbol;Acc:HGNC:25404]	protein_coding	3.95743	7.20595	4.11404	5.84436	4.66609	3.13501	5.33256	4.75819	4.53186	6.78626	3.41387	6.46484	4.49443	5.37612	4.59153	4.178	3.2705	3.05994	4.73765	4.72477	4.22399	2.03413	3.53323	4.14324	1.32622	0.407325	0.000390654	0.0397133	up	no
MSTRG.45177	MCM6	ENST00000264156	GO:0000082(G1/S transition of mitotic cell cycle);GO:0000166(nucleotide binding);GO:0000727(double-strand break repair via break-induced replication);GO:0000784(nuclear chromosome, telomeric region);GO:0003677(DNA binding);GO:0003678(DNA helicase activity);GO:0003688(DNA replication origin binding);GO:0003697(single-stranded DNA binding);GO:0004386(helicase activity);GO:0005515(protein binding);G…	03030(DNA replication);04110(Cell cycle)	K02542	EC:3.6.4.12	minichromosome maintenance complex component 6 [Source:HGNC Symbol;Acc:HGNC:6949]	protein_coding	3.46391	2.32503	2.83751	0.754209	1.86707	0.804898	2.0374	0.833645	1.67487	1.68716	1.30806	1.94013	0.872361	1.5175	0.962677	1.63705	4.14487	3.09601	2.23585	2.25989	3.18234	2.57827	2.15967	3.39137	0.57539	-0.797387	0.00039392	0.039846	down	no
MSTRG.45041	POTEE	ENST00000356920	GO:0001895(retina homeostasis);GO:0003674(molecular_function);GO:0005515(protein binding);GO:0005615(extracellular space);GO:0021762(substantia nigra development);GO:0070062(extracellular exosome);GO:0072562(blood microparticle)	NA	K17299	NA	POTE ankyrin domain family member E [Source:HGNC Symbol;Acc:HGNC:33895]	protein_coding	0.00228388	0.00352602	0.00786162	0	0	0.00627422	0	0	0.0101217	0.0198852	0	0	0.0148323	0.0100185	0.00836661	0.0123669	0	0.030126	0.56311	0.0254749	0.00524736	0.0123431	0.00388716	0.00340101	0.074222	-3.75201	0.000395361	0.0398662	down	yes
MSTRG.63065	ARSK	ENST00000380009;ENST00000504763	GO:0003824(catalytic activity);GO:0004065(arylsulfatase activity);GO:0005576(extracellular region);GO:0005788(endoplasmic reticulum lumen);GO:0008484(sulfuric ester hydrolase activity);GO:0016787(hydrolase activity);GO:0046872(metal ion binding);GO:0046872(metal ion binding)	NA	K12376	EC:3.1.6.-	arylsulfatase family member K [Source:HGNC Symbol;Acc:HGNC:25239]	protein_coding	0.550692	0.826233	0.484714	0.347154	0.432753	0.304031	0.669599	0.187075	0.51277	0.388537	0.115157	0.190817	0.268162	0.625669	0.252508	0.265045	0.621534	0.79665	0.680471	0.713255	0.516819	1.18166	0.771421	1.13437	0.500369	-0.998935	0.00039923	0.0401211	down	no
MSTRG.997	HSD17B10	ENST00000168216;ENST00000375304	GO:0000049(tRNA binding);GO:0003723(RNA binding);GO:0003857(3-hydroxyacyl-CoA dehydrogenase activity);GO:0005515(protein binding);GO:0005737(cytoplasm);GO:0005739(mitochondrion);GO:0005759(mitochondrial matrix);GO:0005886(plasma membrane);GO:0006629(lipid metabolic process);GO:0007005(mitochondrion organization);GO:0008033(tRNA processing);GO:0008709(cholate 7-alpha-dehydrogenase activity);GO:000…	00280(Valine, leucine and isoleucine degradation);05010(Alzheimer disease);05010(Alzheimer disease)	K08683	1.1.1.178;EC:1.1.1.35	hydroxysteroid 17-beta dehydrogenase 10 [Source:HGNC Symbol;Acc:HGNC:4800]	protein_coding	8.60305	8.53652	10.5268	5.48843	6.43586	4.09473	3.80192	4.69133	5.74923	7.44769	6.53912	5.85031	4.21802	7.98921	3.4575	7.523	12.9651	9.76249	12.4387	9.37465	8.20886	11.5403	7.62513	9.48801	0.620078	-0.689479	0.000404502	0.0403245	down	no
MSTRG.66353	TUBB	ENST00000330914;ENST00000327892;ENST00000396389	GO:0000086(G2/M transition of mitotic cell cycle);GO:0000166(nucleotide binding);GO:0000226(microtubule cytoskeleton organization);GO:0000278(mitotic cell cycle);GO:0003924(GTPase activity);GO:0005198(structural molecule activity);GO:0005200(structural constituent of cytoskeleton);GO:0005515(protein binding);GO:0005525(GTP binding);GO:0005576(extracellular region);GO:0005634(nucleus);GO:0005641(n…	04145(Phagosome);04540(Gap junction);05130(Pathogenic Escherichia coli infection);05130(Pathogenic Escherichia coli infection)	K07375	NA	tubulin beta class I [Source:HGNC Symbol;Acc:HGNC:20778]	protein_coding	50.9561	62.9804	36.4881	21.5112	37.2095	20.4355	40.1781	25.7273	34.2164	29.0833	35.9219	49.1097	22.808	46.579	23.306	32.1762	71.5112	84.1435	50.457	50.2335	46.4519	59.1064	53.3219	42.658	0.620995	-0.687346	0.000405083	0.0403245	down	no
MSTRG.9414	LPGAT1	ENST00000366997;ENST00000366996	GO:0003674(molecular_function);GO:0005737(cytoplasm);GO:0005783(endoplasmic reticulum);GO:0005789(endoplasmic reticulum membrane);GO:0006629(lipid metabolic process);GO:0008654(phospholipid biosynthetic process);GO:0012505(endomembrane system);GO:0016020(membrane);GO:0016021(integral component of membrane);GO:0016740(transferase activity);GO:0016746(transferase activity, transferring acyl groups)…	00564(Glycerophospholipid metabolism);00564(Glycerophospholipid metabolism)	K13514	EC:2.3.1.-	lysophosphatidylglycerol acyltransferase 1 [Source:HGNC Symbol;Acc:HGNC:28985]	protein_coding	3.01567	4.81604	5.18387	1.51843	4.69251	2.42879	3.27417	1.72077	2.52801	2.10243	5.75411	4.68838	1.92359	5.28087	2.82616	2.54668	7.18105	6.92957	4.57891	5.76438	3.62685	9.43434	3.48827	15.2649	0.482514	-1.05136	0.000406518	0.0403645	down	yes
MSTRG.9628	IARS2	ENST00000366922	GO:0000049(tRNA binding);GO:0000166(nucleotide binding);GO:0002161(aminoacyl-tRNA editing activity);GO:0004812(aminoacyl-tRNA ligase activity);GO:0004822(isoleucine-tRNA ligase activity);GO:0005524(ATP binding);GO:0005739(mitochondrion);GO:0005759(mitochondrial matrix);GO:0005829(cytosol);GO:0006412(translation);GO:0006418(tRNA aminoacylation for protein translation);GO:0006428(isoleucyl-tRNA ami…	00970(Aminoacyl-tRNA biosynthesis)	K01870	EC:6.1.1.5	isoleucyl-tRNA synthetase 2, mitochondrial [Source:HGNC Symbol;Acc:HGNC:29685]	protein_coding	8.76978	10.1964	9.84482	3.53346	7.09945	4.07976	6.49883	4.18387	3.80777	6.49379	9.65757	8.40251	3.72035	10.5068	3.71333	4.9048	12.694	13.2826	11.7152	10.0902	7.57129	11.8542	9.00606	16.3407	0.569468	-0.812313	0.000408332	0.0404916	down	no
MSTRG.62423	MAP1B	ENST00000296755;ENST00000512974;ENST00000504492	GO:0000226(microtubule cytoskeleton organization);GO:0001578(microtubule bundle formation);GO:0001750(photoreceptor outer segment);GO:0001764(neuron migration);GO:0003779(actin binding);GO:0005198(structural molecule activity);GO:0005515(protein binding);GO:0005543(phospholipid binding);GO:0005737(cytoplasm);GO:0005829(cytosol);GO:0005856(cytoskeleton);GO:0005874(microtubule);GO:0005875(microtubu…	NA	K10429	NA	microtubule associated protein 1B [Source:HGNC Symbol;Acc:HGNC:6836]	protein_coding	2.21618	1.73089	2.72366	1.80861	3.28165	2.26447	1.39922	0.447719	3.19287	1.1441	1.10968	1.49769	1.43323	1.25029	0.50531	1.27018	6.38164	4.06744	4.5849	3.85969	4.64999	4.20701	1.41038	1.81085	0.440331	-1.18334	0.000410989	0.0405758	down	yes
MSTRG.71903	FZD1	ENST00000287934	GO:0001934(positive regulation of protein phosphorylation);GO:0003149(membranous septum morphogenesis);GO:0003150(muscular septum morphogenesis);GO:0003151(outflow tract morphogenesis);GO:0004888(transmembrane signaling receptor activity);GO:0004930(G protein-coupled receptor activity);GO:0005102(signaling receptor binding);GO:0005109(frizzled binding);GO:0005515(protein binding);GO:0005886(plasm…	04150(mTOR signaling pathway);04310(Wnt signaling pathway);04390(Hippo signaling pathway);04550(Signaling pathways regulating pluripotency of stem cells);04916(Melanogenesis);04934(Cushing syndrome);05165(Human papillomavirus infection);05200(Pathways in cancer);05205(Proteoglycans in cancer);05217(Basal cell carcinoma);05224(Breast cancer);05225(Hepatocellular carcinoma);05226(Gastric cancer)	K02432	NA	frizzled class receptor 1 [Source:HGNC Symbol;Acc:HGNC:4038]	protein_coding	4.93011	5.59645	7.91482	4.95395	7.03532	2.80005	5.22753	4.1655	4.3094	3.73498	2.13995	5.44104	4.36646	9.04711	3.28596	3.68665	8.26828	13.3929	14.7821	7.8711	7.42617	7.00763	6.67263	6.06727	0.549989	-0.862526	0.000432925	0.0420295	down	no
MSTRG.48596	MAPRE1	ENST00000375571	GO:0000086(G2/M transition of mitotic cell cycle);GO:0001578(microtubule bundle formation);GO:0003723(RNA binding);GO:0005515(protein binding);GO:0005737(cytoplasm);GO:0005794(Golgi apparatus);GO:0005813(centrosome);GO:0005815(microtubule organizing center);GO:0005819(spindle);GO:0005829(cytosol);GO:0005856(cytoskeleton);GO:0005874(microtubule);GO:0005881(cytoplasmic microtubule);GO:0005925(focal…	NA	K10436	NA	microtubule associated protein RP/EB family member 1 [Source:HGNC Symbol;Acc:HGNC:6890]	protein_coding	13.6915	16.2391	15.5333	6.06945	14.7487	4.45601	8.15994	5.9962	6.67219	6.55577	11.7127	10.8606	5.71968	8.61241	5.04087	8.74724	16.5495	14.7915	15.3545	13.2197	15.3848	24.3379	11.5975	17.6914	0.577132	-0.793026	0.000437137	0.0422044	down	no
MSTRG.78642	ROR2	ENST00000375708;ENST00000375715	GO:0000166(nucleotide binding);GO:0001501(skeletal system development);GO:0001502(cartilage condensation);GO:0001756(somitogenesis);GO:0004672(protein kinase activity);GO:0004713(protein tyrosine kinase activity);GO:0004714(transmembrane receptor protein tyrosine kinase activity);GO:0005109(frizzled binding);GO:0005515(protein binding);GO:0005524(ATP binding);GO:0005737(cytoplasm);GO:0005874(micr…	04310(Wnt signaling pathway);04310(Wnt signaling pathway)	K05123	EC:2.7.10.1	receptor tyrosine kinase like orphan receptor 2 [Source:HGNC Symbol;Acc:HGNC:10257]	protein_coding	1.2058	0.611978	1.09357	0.380119	0.631128	0.734324	1.35319	0.448856	1.04924	0.877611	0.230685	0.813973	0.353029	1.07317	0.3995	0.549916	0.707035	2.79152	2.03706	1.61187	2.61854	1.35417	1.08671	0.56297	0.462264	-1.11321	0.000437269	0.0422044	down	yes
MSTRG.16461	AQP11	ENST00000313578	GO:0001822(kidney development);GO:0005737(cytoplasm);GO:0005783(endoplasmic reticulum);GO:0005789(endoplasmic reticulum membrane);GO:0005829(cytosol);GO:0005886(plasma membrane);GO:0006612(protein targeting to membrane);GO:0006833(water transport);GO:0008284(positive regulation of cell population proliferation);GO:0009986(cell surface);GO:0009992(cellular water homeostasis);GO:0015250(water chann…	NA	K09870	NA	aquaporin 11 [Source:HGNC Symbol;Acc:HGNC:19940]	protein_coding	0.726898	0.496376	0.87122	0.323975	0.593163	0.432073	0.69709	0.440724	0.570553	0.670061	0.675208	0.903721	0.541892	0.549805	0.530109	0.4241	0.846512	7.20387	0.645908	1.11927	0.857983	0.761023	0.426127	0.647002	0.377646	-1.40489	0.000440949	0.0423684	down	yes
MSTRG.66192	H2BC13	ENST00000377401	GO:0000786(nucleosome);GO:0003677(DNA binding);GO:0005515(protein binding);GO:0005634(nucleus);GO:0005654(nucleoplasm);GO:0005694(chromosome);GO:0005829(cytosol);GO:0006334(nucleosome assembly);GO:0016567(protein ubiquitination);GO:0046982(protein heterodimerization activity);GO:0070062(extracellular exosome)	05034(Alcoholism);05203(Viral carcinogenesis);05322(Systemic lupus erythematosus)	NA	NA	H2B clustered histone 13 [Source:HGNC Symbol;Acc:HGNC:4748]	protein_coding	3.35752	5.86609	3.33041	0.649612	1.92402	0.690667	2.36674	0.812484	3.03112	3.42506	4.46889	4.0397	0.648755	2.38971	4.64798	3.94003	10.8805	8.62712	4.92638	3.37004	7.95066	16.6808	5.01355	2.73721	0.378731	-1.40076	0.000441974	0.0424215	down	yes
MSTRG.1662	TAF9B	ENST00000341864	GO:0000122(negative regulation of transcription by RNA polymerase II);GO:0000124(SAGA complex);GO:0000976(transcription regulatory region sequence-specific DNA binding);GO:0003714(transcription corepressor activity);GO:0005515(protein binding);GO:0005634(nucleus);GO:0005654(nucleoplasm);GO:0005669(transcription factor TFIID complex);GO:0006352(DNA-templated transcription, initiation);GO:0006366(t…	03022(Basal transcription factors)	K03133	NA	TATA-box binding protein associated factor 9b [Source:HGNC Symbol;Acc:HGNC:17306]	protein_coding	3.11657	2.11119	2.84295	0.809206	2.46653	1.0722	2.11264	0.851806	1.61755	1.7628	1.69975	1.57253	1.40567	2.96319	0.897161	1.6145	3.31488	3.44204	2.20198	3.75209	2.58858	3.82579	1.83576	3.73717	0.585389	-0.772532	0.000445455	0.0426622	down	no
MSTRG.35103	DHX8	ENST00000262415;ENST00000589898;ENST00000540306;ENST00000587574	GO:0000166(nucleotide binding);GO:0000390(spliceosomal complex disassembly);GO:0000398(mRNA splicing, via spliceosome);GO:0003676(nucleic acid binding);GO:0003723(RNA binding);GO:0003724(RNA helicase activity);GO:0004386(helicase activity);GO:0005515(protein binding);GO:0005524(ATP binding);GO:0005634(nucleus);GO:0005654(nucleoplasm);GO:0005681(spliceosomal complex);GO:0006396(RNA processing);GO:…	03040(Spliceosome);03040(Spliceosome)	NA	NA	DEAH-box helicase 8 [Source:HGNC Symbol;Acc:HGNC:2749]	protein_coding	3.08526	2.77116	2.80739	1.71444	2.77416	1.94032	2.11459	1.6307	2.51659	2.57554	2.7541	3.15898	1.56527	2.33537	1.26847	1.99509	3.90672	2.99616	3.59021	3.2222	2.95777	3.35947	3.01471	3.97572	0.684741	-0.54637	0.000447474	0.0426622	down	no
MSTRG.56215	CP	ENST00000264613;ENST00000455472;ENST00000479771;ENST00000494544	GO:0004322(ferroxidase activity);GO:0005507(copper ion binding);GO:0005576(extracellular region);GO:0005615(extracellular space);GO:0005765(lysosomal membrane);GO:0005788(endoplasmic reticulum lumen);GO:0005886(plasma membrane);GO:0006811(ion transport);GO:0006825(copper ion transport);GO:0006826(iron ion transport);GO:0006879(cellular iron ion homeostasis);GO:0016491(oxidoreductase activity);GO:…	00860(Porphyrin and chlorophyll metabolism);04216(Ferroptosis);04216(Ferroptosis)	NA	NA	ceruloplasmin [Source:HGNC Symbol;Acc:HGNC:2295]	protein_coding	2.60829	1.18778	5.02582	0.353296	3.64276	0.889496	14.559	1.41526	19.687	2.56157	0.951725	3.95307	0.9453	1.51317	1.04314	4.35324	59.5569	19.4355	15.3383	5.53305	3.98266	35.1427	0.533344	3.4707	0.2262	-2.14433	0.000447809	0.0426622	down	yes
MSTRG.54293	PDHB	ENST00000302746;ENST00000383714	GO:0003824(catalytic activity);GO:0004739(pyruvate dehydrogenase (acetyl-transferring) activity);GO:0005515(protein binding);GO:0005634(nucleus);GO:0005654(nucleoplasm);GO:0005739(mitochondrion);GO:0005759(mitochondrial matrix);GO:0005967(mitochondrial pyruvate dehydrogenase complex);GO:0005975(carbohydrate metabolic process);GO:0006006(glucose metabolic process);GO:0006086(acetyl-CoA biosyntheti…	00010(Glycolysis / Gluconeogenesis);00020(Citrate cycle (TCA cycle));00620(Pyruvate metabolism);04066(HIF-1 signaling pathway);04922(Glucagon signaling pathway);05230(Central carbon metabolism in cancer);05230(Central carbon metabolism in cancer)	NA	NA	pyruvate dehydrogenase E1 subunit beta [Source:HGNC Symbol;Acc:HGNC:8808]	protein_coding	3.48709	3.67132	3.61788	1.35465	1.98335	1.10998	1.51165	0.935656	1.56034	1.94331	1.75524	1.95726	1.66676	2.34377	1.01156	1.7548	4.54279	3.06114	3.42748	3.29554	3.02656	3.38341	2.49313	3.61268	0.589817	-0.76166	0.000457302	0.0434292	down	no
MSTRG.50298	ATP5PO;DONSON;AP000311	ENST00000290299;ENST00000303071;ENST00000303113;ENST00000432378;ENST00000437395;ENST00000453626;ENST00000418933;ENST00000440810;ENST00000429238	GO:0005515(protein binding);GO:0005634(nucleus);GO:0005739(mitochondrion);GO:0005743(mitochondrial inner membrane);GO:0005753(mitochondrial proton-transporting ATP synthase complex);GO:0005886(plasma membrane);GO:0006754(ATP biosynthetic process);GO:0006811(ion transport);GO:0008144(drug binding);GO:0015986(ATP synthesis coupled proton transport);GO:0016020(membrane);GO:0042407(cristae formation)…	00190(Oxidative phosphorylation);04714(Thermogenesis);05010(Alzheimer disease);05012(Parkinson disease);05016(Huntington disease);05016(Huntington disease)	K22422	NA	ATP synthase peripheral stalk subunit OSCP [Source:HGNC Symbol;Acc:HGNC:850];DNA replication fork stabilization factor DONSON [Source:HGNC Symbol;Acc:HGNC:2993];novel protein similar to ATP synthase delta (OSCP) subunit domain	protein_coding	2.68849	2.94958	2.14193	1.36339	2.30011	1.48938	2.41884	1.80231	1.9439	1.77202	2.37749	2.33307	1.17201	2.6888	1.28343	2.03342	3.05963	3.47872	3.05034	2.7007	2.65076	3.35815	2.71756	3.12727	0.678416	-0.559758	0.000460754	0.0436175	down	no
MSTRG.64514	DPYSL3	ENST00000398514;ENST00000343218;ENST00000512722	GO:0005515(protein binding);GO:0005615(extracellular space);GO:0005737(cytoplasm);GO:0005829(cytosol);GO:0010975(regulation of neuron projection development);GO:0010976(positive regulation of neuron projection development);GO:0010977(negative regulation of neuron projection development);GO:0016787(hydrolase activity);GO:0016810(hydrolase activity, acting on carbon-nitrogen (but not peptide) bonds…	NA	NA	NA	dihydropyrimidinase like 3 [Source:HGNC Symbol;Acc:HGNC:3015]	protein_coding	4.30435	4.03437	6.32292	4.58641	6.01913	2.84186	3.63936	1.20503	3.80977	2.61819	1.15385	3.66588	2.90284	3.35034	1.51223	3.27152	7.60332	15.5589	10.3046	6.28374	8.96956	4.33916	7.1902	1.61002	0.44648	-1.16333	0.00046291	0.0437755	down	yes
MSTRG.10413	ZNF670;ZNF695	ENST00000366503;ENST00000339986	GO:0003676(nucleic acid binding);GO:0003677(DNA binding);GO:0005515(protein binding);GO:0005634(nucleus);GO:0006355(regulation of transcription, DNA-templated);GO:0046872(metal ion binding);GO:0000978(RNA polymerase II cis-regulatory region sequence-specific DNA binding);GO:0046872(metal ion binding)	05168(Herpes simplex virus 1 infection)	K09228	NA	zinc finger protein 670 [Source:HGNC Symbol;Acc:HGNC:28167];zinc finger protein 695 [Source:HGNC Symbol;Acc:HGNC:30954]	protein_coding	0.168565	0.192485	0.278906	0.0629221	0.152419	0.0615387	0.152128	0.0409399	0.0934909	0.135335	0.21198	0.223361	0.0902298	0.163068	0.0992193	0.106855	0.195055	0.338084	0.248105	0.256348	0.274115	0.225567	0.176338	0.461717	0.513358	-0.961964	0.000463668	0.043801	down	no
MSTRG.1526	SLC16A2	ENST00000587091;ENST00000590447	GO:0005215(transporter activity);GO:0005886(plasma membrane);GO:0005887(integral component of plasma membrane);GO:0006520(cellular amino acid metabolic process);GO:0006590(thyroid hormone generation);GO:0008028(monocarboxylic acid transmembrane transporter activity);GO:0015171(amino acid transmembrane transporter activity);GO:0015293(symporter activity);GO:0015349(thyroid hormone transmembrane tr…	04919(Thyroid hormone signaling pathway);04919(Thyroid hormone signaling pathway)	K08231	NA	solute carrier family 16 member 2 [Source:HGNC Symbol;Acc:HGNC:10923]	protein_coding	3.12419	2.99498	2.30528	1.21086	3.03509	2.67093	2.22893	0.996771	1.67061	1.96278	0.698139	1.48927	1.57239	2.89946	1.47435	1.52	5.02043	8.5214	4.26587	4.83631	5.46762	3.35178	2.48315	0.842297	0.45782	-1.12715	0.000465543	0.0438858	down	yes
MSTRG.74444	PEBP4	ENST00000256404;ENST00000522278	GO:0005515(protein binding);GO:0005764(lysosome);GO:0016020(membrane);GO:0016021(integral component of membrane);GO:0070062(extracellular exosome);GO:0070062(extracellular exosome)	NA	NA	NA	phosphatidylethanolamine binding protein 4 [Source:HGNC Symbol;Acc:HGNC:28319]	protein_coding	0.869436	6.36541	3.80815	1.17548	0.844132	1.9293	2.60432	3.55257	1.67715	1.5608	0.370332	0.0538331	3.08236	0.658789	6.51455	1.55904	1.20338	0.131371	0.261488	1.77374	0.413199	0.13686	1.19449	0.697462	3.15087	1.65575	0.000474197	0.0444813	up	yes
MSTRG.8817	IVNS1ABP	ENST00000367498;ENST00000422754	GO:0005515(protein binding);GO:0005634(nucleus);GO:0005654(nucleoplasm);GO:0005667(transcription factor complex);GO:0005681(spliceosomal complex);GO:0005737(cytoplasm);GO:0005829(cytosol);GO:0005856(cytoskeleton);GO:0006383(transcription by RNA polymerase III);GO:0008380(RNA splicing);GO:0009615(response to virus);GO:0016032(viral process);GO:0031397(negative regulation of protein ubiquitination)…	05164(Influenza A);05164(Influenza A)	K15046	NA	influenza virus NS1A binding protein [Source:HGNC Symbol;Acc:HGNC:16951]	protein_coding	7.27855	8.29717	8.39447	3.58061	11.7272	5.21874	6.82762	2.4667	4.36171	4.46251	8.10847	6.43506	3.13063	5.16103	2.73907	4.07359	9.47462	10.4	15.0092	6.90029	7.12499	18.3346	9.43134	9.74265	0.533821	-0.905572	0.000476109	0.0445542	down	no
MSTRG.36889	USP14	ENST00000582707;ENST00000261601;ENST00000400266;ENST00000580410;ENST00000581983	GO:0000502(proteasome complex);GO:0002376(immune system process);GO:0004197(cysteine-type endopeptidase activity);GO:0004843(thiol-dependent ubiquitin-specific protease activity);GO:0004866(endopeptidase inhibitor activity);GO:0005515(protein binding);GO:0005634(nucleus);GO:0005737(cytoplasm);GO:0005829(cytosol);GO:0005886(plasma membrane);GO:0006508(proteolysis);GO:0006511(ubiquitin-dependent pr…	NA	K11843	EC:3.4.19.12	ubiquitin specific peptidase 14 [Source:HGNC Symbol;Acc:HGNC:12612]	protein_coding	3.35823	3.43922	3.85691	1.15556	3.8027	0.638686	1.36758	0.828699	2.88318	2.12829	2.72463	2.21277	1.72873	2.12171	1.7295	2.20892	6.26636	4.85215	4.20024	3.10747	3.90413	3.51775	3.16066	4.22848	0.544349	-0.877396	0.000478299	0.0446789	down	no
MSTRG.61089	CASP3	ENST00000523916;ENST00000447121;ENST00000517513;ENST00000393588;ENST00000308394;ENST00000393585	GO:0001554(luteolysis);GO:0001666(response to hypoxia);GO:0001782(B cell homeostasis);GO:0002020(protease binding);GO:0004190(aspartic-type endopeptidase activity);GO:0004197(cysteine-type endopeptidase activity);GO:0004861(cyclin-dependent protein serine/threonine kinase inhibitor activity);GO:0005123(death receptor binding);GO:0005515(protein binding);GO:0005634(nucleus);GO:0005654(nucleoplasm)…	01524(Platinum drug resistance);04010(MAPK signaling pathway);04115(p53 signaling pathway);04210(Apoptosis);04215(Apoptosis - multiple species);04650(Natural killer cell mediated cytotoxicity);04657(IL-17 signaling pathway);04668(TNF signaling pathway);04726(Serotonergic synapse);04932(Non-alcoholic fatty liver disease (NAFLD));04933(AGE-RAGE signaling pathway in diabetic complications);05010(Alz…	NA	NA	caspase 3 [Source:HGNC Symbol;Acc:HGNC:1504]	protein_coding	4.00119	2.58457	1.97286	1.54549	2.55884	1.34195	2.8146	1.65967	2.29048	1.86783	3.06668	2.065	1.44294	2.30683	2.07779	2.28481	4.50097	3.52259	3.59177	3.17241	3.87987	4.80434	2.72808	2.37939	0.627751	-0.671736	0.000482137	0.0448378	down	no
MSTRG.35220	GFAP	ENST00000588735;ENST00000639921;ENST00000435360;ENST00000592320	GO:0005178(integrin binding);GO:0005200(structural constituent of cytoskeleton);GO:0005515(protein binding);GO:0005737(cytoplasm);GO:0005764(lysosome);GO:0005829(cytosol);GO:0005856(cytoskeleton);GO:0005882(intermediate filament);GO:0009611(response to wounding);GO:0010625(positive regulation of Schwann cell proliferation);GO:0010977(negative regulation of neuron projection development);GO:001400…	04630(Jak-STAT signaling pathway);04630(Jak-STAT signaling pathway)	NA	NA	glial fibrillary acidic protein [Source:HGNC Symbol;Acc:HGNC:4235]	protein_coding	0.012918	0.00807031	0.0095499	0.00368595	0.0238381	0.00686493	0.0226665	0.0264834	0.0219584	0.0190654	0	0.0381031	0.0188585	0.0121984	0.0169048	0.00387852	0.195846	0.0200001	0.0153496	0.166507	0.0380518	0.0286698	0.0453401	0.010581	0.235463	-2.08643	0.000483904	0.0449089	down	yes
MSTRG.75417	SULF1	ENST00000525999;ENST00000458141;ENST00000260128;ENST00000402687;ENST00000528783;ENST00000419716;ENST00000529134;ENST00000616868;ENST00000525061	GO:0001822(kidney development);GO:0001937(negative regulation of endothelial cell proliferation);GO:0002063(chondrocyte development);GO:0003094(glomerular filtration);GO:0003824(catalytic activity);GO:0004065(arylsulfatase activity);GO:0005509(calcium ion binding);GO:0005539(glycosaminoglycan binding);GO:0005615(extracellular space);GO:0005783(endoplasmic reticulum);GO:0005794(Golgi apparatus);GO…	NA	K14607	EC:3.1.6.-	sulfatase 1 [Source:HGNC Symbol;Acc:HGNC:20391]	protein_coding	1.76623	0.936182	1.86967	0.618973	2.49384	0.468012	1.43572	0.707724	0.916843	0.590534	0.571117	4.83675	0.46973	0.892495	0.879566	0.760387	3.42971	4.99218	6.40823	1.34892	2.3823	4.65956	1.05859	2.1463	0.382463	-1.38661	0.000485879	0.044974	down	yes
MSTRG.22256	FBRSL1	ENST00000434748;ENST00000650108	GO:0003723(RNA binding);GO:0003723(RNA binding)	NA	NA	NA	fibrosin like 1 [Source:HGNC Symbol;Acc:HGNC:29308]	protein_coding	3.26543	2.51371	2.66553	4.09385	2.79588	2.91858	3.05767	3.45911	3.18606	3.65395	4.48097	4.62606	3.24491	3.21756	3.10214	3.24003	1.70977	1.76215	2.45286	2.19749	3.3834	2.93645	3.59829	1.86224	1.34458	0.427156	0.00048686	0.044974	up	no
MSTRG.20134	RPL41	ENST00000546591;ENST00000501597	GO:0000184(nuclear-transcribed mRNA catabolic process, nonsense-mediated decay);GO:0002181(cytoplasmic translation);GO:0003723(RNA binding);GO:0003730(mRNA 3'-UTR binding);GO:0003735(structural constituent of ribosome);GO:0005515(protein binding);GO:0005783(endoplasmic reticulum);GO:0005829(cytosol);GO:0005840(ribosome);GO:0006412(translation);GO:0006413(translational initiation);GO:0006614(SRP-d…	03010(Ribosome);03010(Ribosome)	K02928	NA	ribosomal protein L41 [Source:HGNC Symbol;Acc:HGNC:10354]	protein_coding	28.2389	17.621	22.2535	17.4494	17.8174	12.4497	18.843	8.09023	13.4745	20.791	24.1375	26.8433	3.43735	14.248	10.636	16.4072	33.6891	18.2002	16.6722	63.0537	54.3804	15.6927	28.136	73.1373	0.45012	-1.15162	0.000489108	0.0450657	down	yes
MSTRG.62564	FAM169A	ENST00000510496;ENST00000389156;ENST00000514200;ENST00000506954	GO:0005515(protein binding);GO:0005634(nucleus);GO:0005635(nuclear envelope);GO:0005637(nuclear inner membrane);GO:0016020(membrane);GO:0016020(membrane)	NA	NA	NA	family with sequence similarity 169 member A [Source:HGNC Symbol;Acc:HGNC:29138]	protein_coding	0.1526	0.0914015	0.221941	0.127235	0.157414	0.0414521	0.206275	0.0571799	0.114937	0.107366	0.263354	0.0754347	0.0213704	0.0877278	0.224307	0.0957665	0.267375	0.1918	0.302988	0.30927	0.359651	1.77516	0.0871712	0.0723903	0.303904	-1.71831	0.00049228	0.0452187	down	yes
MSTRG.78539	NTRK2	ENST00000359847;ENST00000376213;ENST00000304053;ENST00000376214;ENST00000277120;ENST00000395882	GO:0000139(Golgi membrane);GO:0000166(nucleotide binding);GO:0001570(vasculogenesis);GO:0001764(neuron migration);GO:0001934(positive regulation of protein phosphorylation);GO:0002020(protease binding);GO:0004672(protein kinase activity);GO:0004713(protein tyrosine kinase activity);GO:0004714(transmembrane receptor protein tyrosine kinase activity);GO:0005030(neurotrophin receptor activity);GO:00…	04010(MAPK signaling pathway);04014(Ras signaling pathway);04151(PI3K-Akt signaling pathway);04722(Neurotrophin signaling pathway);05034(Alcoholism);05034(Alcoholism)	K04360	EC:2.7.10.1	neurotrophic receptor tyrosine kinase 2 [Source:HGNC Symbol;Acc:HGNC:8032]	protein_coding	0.430899	0.603504	0.310128	0.145585	0.126571	0.326191	0.113397	0.072336	0.135572	0.167243	0.0291029	0.0664472	0.218522	0.126163	0.0374213	0.213959	0.107644	0.106318	0.0722676	0.850244	0.825876	0.152993	0.81035	3.48526	0.243571	-2.03759	0.000498645	0.0456989	down	yes
MSTRG.39452	RPL18A	ENST00000222247;ENST00000597648;ENST00000599870;ENST00000600147	GO:0000184(nuclear-transcribed mRNA catabolic process, nonsense-mediated decay);GO:0002181(cytoplasmic translation);GO:0003723(RNA binding);GO:0003735(structural constituent of ribosome);GO:0005515(protein binding);GO:0005829(cytosol);GO:0005840(ribosome);GO:0006412(translation);GO:0006413(translational initiation);GO:0006614(SRP-dependent cotranslational protein targeting to membrane);GO:0016020…	03010(Ribosome);03010(Ribosome)	K02882	NA	ribosomal protein L18a [Source:HGNC Symbol;Acc:HGNC:10311]	protein_coding	23.2132	21.34	19.3442	12.0406	19.4283	12.8671	13.9239	10.5075	15.4677	18.0239	9.47083	12.8011	10.0502	21.7277	11.0597	14.624	27.6922	26.3991	18.7858	23.8357	27.0291	16.7909	22.8012	21.929	0.663624	-0.591561	0.000500633	0.0457985	down	no
MSTRG.4962	KIF2C	ENST00000372224;ENST00000455186;ENST00000452259;ENST00000423289;ENST00000372217	GO:0000166(nucleotide binding);GO:0000775(chromosome, centromeric region);GO:0000776(kinetochore);GO:0000777(condensed chromosome kinetochore);GO:0003774(motor activity);GO:0003777(microtubule motor activity);GO:0005515(protein binding);GO:0005524(ATP binding);GO:0005634(nucleus);GO:0005694(chromosome);GO:0005737(cytoplasm);GO:0005813(centrosome);GO:0005819(spindle);GO:0005829(cytosol);GO:0005856…	NA	K10393	NA	kinesin family member 2C [Source:HGNC Symbol;Acc:HGNC:6393]	protein_coding	0.594278	1.10895	0.344394	0.0759867	0.237079	0.231814	0.498339	0.200401	0.199792	0.176163	0.312689	0.468907	0.164468	0.332659	0.196069	0.512243	1.59138	2.13271	0.685573	0.412397	0.548683	1.27433	0.542781	0.227496	0.381252	-1.39118	0.0005012	0.0458037	down	yes
MSTRG.39341	FAM32A	ENST00000263384;ENST00000589852;ENST00000588367;ENST00000587351	GO:0003723(RNA binding);GO:0005515(protein binding);GO:0005634(nucleus);GO:0005654(nucleoplasm);GO:0005730(nucleolus);GO:0006915(apoptotic process);GO:0007049(cell cycle);GO:0008150(biological_process);GO:0008150(biological_process)	NA	K13120	NA	family with sequence similarity 32 member A [Source:HGNC Symbol;Acc:HGNC:24563]	protein_coding	7.70828	7.29402	6.46046	3.89925	6.58303	3.46059	5.22647	3.06529	6.85765	4.91248	4.10005	5.1954	3.71674	6.68659	4.00953	4.36123	8.65601	9.06464	6.53041	7.7363	6.48699	8.31036	7.455	6.46038	0.688113	-0.539282	0.00050568	0.0461192	down	no
MSTRG.20075	GPR84	ENST00000551809;ENST00000267015	GO:0001604(urotensin II receptor activity);GO:0004930(G protein-coupled receptor activity);GO:0005886(plasma membrane);GO:0005887(integral component of plasma membrane);GO:0007165(signal transduction);GO:0007186(G protein-coupled receptor signaling pathway);GO:0007218(neuropeptide signaling pathway);GO:0008150(biological_process);GO:0008528(G protein-coupled peptide receptor activity);GO:0016020(…	NA	K08421	NA	G protein-coupled receptor 84 [Source:HGNC Symbol;Acc:HGNC:4535]	protein_coding	0.45048	0.472671	0.212319	0.063243	0.309723	0.39017	0.35238	0.110468	0.342595	0.113961	0.134201	0.402811	0.029593	0.195959	0.0901706	0.303281	1.75637	0.696634	0.349065	0.277423	0.437137	1.1151	0.550222	0.39239	0.356457	-1.4882	0.000506207	0.0461203	down	yes
MSTRG.46321	GLS	ENST00000457316;ENST00000409626;ENST00000338435;ENST00000412247;ENST00000320717	GO:0001967(suckling behavior);GO:0002087(regulation of respiratory gaseous exchange by nervous system process);GO:0004359(glutaminase activity);GO:0005515(protein binding);GO:0005737(cytoplasm);GO:0005739(mitochondrion);GO:0005759(mitochondrial matrix);GO:0005829(cytosol);GO:0006537(glutamate biosynthetic process);GO:0006541(glutamine metabolic process);GO:0006543(glutamine catabolic process);GO:…	00220(Arginine biosynthesis);00250(Alanine, aspartate and glutamate metabolism);00471(D-Glutamine and D-glutamate metabolism);04724(Glutamatergic synapse);04727(GABAergic synapse);04964(Proximal tubule bicarbonate reclamation);05206(MicroRNAs in cancer);05230(Central carbon metabolism in cancer);05230(Central carbon metabolism in cancer)	NA	NA	glutaminase [Source:HGNC Symbol;Acc:HGNC:4331]	protein_coding	4.05266	5.67528	6.68166	4.08277	8.68298	2.91034	3.95323	3.789	5.45965	5.24357	3.00196	1.72106	3.78528	2.53222	5.36536	7.48656	3.18223	3.27064	2.71708	2.92802	3.03469	2.81231	3.61943	3.14326	1.50608	0.590802	0.000517842	0.0467062	up	no
MSTRG.1026	MAGED2	ENST00000375058;ENST00000375068;ENST00000396224;ENST00000218439;ENST00000375053	GO:0002576(platelet degranulation);GO:0005515(protein binding);GO:0005576(extracellular region);GO:0005654(nucleoplasm);GO:0005730(nucleolus);GO:0005829(cytosol);GO:0007565(female pregnancy);GO:0016020(membrane);GO:0031093(platelet alpha granule lumen);GO:0070294(renal sodium ion absorption);GO:0070294(renal sodium ion absorption)	NA	NA	NA	MAGE family member D2 [Source:HGNC Symbol;Acc:HGNC:16353]	protein_coding	15.957	14.7038	13.934	9.07998	11.9716	6.15134	16.8586	7.8138	11.5509	10.7657	9.8477	10.6594	7.48273	20.4831	5.5535	12.1833	33.7547	28.4864	20.4611	16.6222	15.988	18.0638	14.8113	10.7597	0.581944	-0.781048	0.000519414	0.0468009	down	no
MSTRG.25438	HIF1A;SNAPC1	ENST00000539097;ENST00000337138;ENST00000216294;ENST00000323441;ENST00000394997	GO:0000790(nuclear chromatin);GO:0000977(RNA polymerase II regulatory region sequence-specific DNA binding);GO:0000978(RNA polymerase II cis-regulatory region sequence-specific DNA binding);GO:0000981(DNA-binding transcription factor activity, RNA polymerase II-specific);GO:0001228(DNA-binding transcription activator activity, RNA polymerase II-specific);GO:0001525(angiogenesis);GO:0001568(blood …	04066(HIF-1 signaling pathway);04137(Mitophagy - animal);04140(Autophagy - animal);04659(Th17 cell differentiation);04919(Thyroid hormone signaling pathway);05167(Kaposi sarcoma-associated herpesvirus infection);05200(Pathways in cancer);05205(Proteoglycans in cancer);05211(Renal cell carcinoma);05230(Central carbon metabolism in cancer);05231(Choline metabolism in cancer);05231(Choline metabolis…	K08268;K15208	NA	hypoxia inducible factor 1 subunit alpha [Source:HGNC Symbol;Acc:HGNC:4910];small nuclear RNA activating complex polypeptide 1 [Source:HGNC Symbol;Acc:HGNC:11134]	protein_coding	4.32547	3.2776	2.99735	1.19693	3.38924	1.3675	2.21821	0.98247	2.38652	2.8074	3.57215	3.24822	0.907584	2.08772	1.8793	2.01608	5.00258	5.35357	2.4407	2.55769	4.25805	5.80163	2.96646	9.02906	0.516707	-0.952583	0.000533153	0.0477402	down	no
MSTRG.1387	NONO	ENST00000373856;ENST00000535149;ENST00000450092;ENST00000420903;ENST00000373841;ENST00000276079	GO:0000398(mRNA splicing, via spliceosome);GO:0000976(transcription regulatory region sequence-specific DNA binding);GO:0000978(RNA polymerase II cis-regulatory region sequence-specific DNA binding);GO:0001650(fibrillar center);GO:0002218(activation of innate immune response);GO:0002376(immune system process);GO:0003676(nucleic acid binding);GO:0003677(DNA binding);GO:0003682(chromatin binding);G…	NA	K13214	NA	non-POU domain containing octamer binding [Source:HGNC Symbol;Acc:HGNC:7871]	protein_coding	6.00628	5.8684	5.82595	3.34584	8.6793	4.81349	7.40355	3.21237	4.94329	6.8767	6.74503	5.62649	3.97487	6.88059	3.62555	5.62919	8.1768	11.0773	8.18101	7.63359	5.70879	7.42538	8.44483	14.8031	0.626004	-0.675757	0.000538635	0.0480027	down	no
MSTRG.17593	VPS11	ENST00000620429;ENST00000621676;ENST00000614944;ENST00000530809	GO:0000166(nucleotide binding);GO:0005515(protein binding);GO:0005764(lysosome);GO:0005765(lysosomal membrane);GO:0005768(endosome);GO:0005769(early endosome);GO:0005770(late endosome);GO:0005776(autophagosome);GO:0005884(actin filament);GO:0006886(intracellular protein transport);GO:0006904(vesicle docking involved in exocytosis);GO:0006914(autophagy);GO:0007032(endosome organization);GO:0007033…	NA	K20179	NA	VPS11 core subunit of CORVET and HOPS complexes [Source:HGNC Symbol;Acc:HGNC:14583]	protein_coding	4.10113	4.24124	3.78406	2.72132	3.86285	2.12261	4.03532	2.48923	4.05319	4.10183	3.21506	3.27501	2.5021	3.90443	2.36764	3.17461	7.18241	3.22211	6.92618	4.68873	4.12686	4.18934	4.75567	4.31462	0.684562	-0.546746	0.000547835	0.0485709	down	no
MSTRG.74449	RHOBTB2	ENST00000519685;ENST00000522948;ENST00000251822;ENST00000524077	GO:0000166(nucleotide binding);GO:0003924(GTPase activity);GO:0005515(protein binding);GO:0005525(GTP binding);GO:0005737(cytoplasm);GO:0005829(cytosol);GO:0005856(cytoskeleton);GO:0005886(plasma membrane);GO:0005938(cell cortex);GO:0007015(actin filament organization);GO:0007264(small GTPase mediated signal transduction);GO:0008360(regulation of cell shape);GO:0019901(protein kinase binding);GO:…	04120(Ubiquitin mediated proteolysis);04120(Ubiquitin mediated proteolysis)	K07868	NA	Rho related BTB domain containing 2 [Source:HGNC Symbol;Acc:HGNC:18756]	protein_coding	8.74402	9.35422	9.89303	6.80781	6.73089	2.98348	10.2482	3.18631	9.41348	5.22512	10.4353	5.11698	4.21002	2.24672	6.67701	3.54121	5.12255	5.01359	3.34307	4.07295	2.18487	4.12422	3.17523	4.1955	1.67799	0.746733	0.000548606	0.0485709	up	no
MSTRG.60356	SETD7	ENST00000274031;ENST00000404104;ENST00000506866;ENST00000406354;ENST00000608958;ENST00000608795	GO:0002039(p53 binding);GO:0003682(chromatin binding);GO:0005515(protein binding);GO:0005634(nucleus);GO:0005654(nucleoplasm);GO:0005694(chromosome);GO:0005730(nucleolus);GO:0006325(chromatin organization);GO:0006355(regulation of transcription, DNA-templated);GO:0006974(cellular response to DNA damage stimulus);GO:0008168(methyltransferase activity);GO:0016279(protein-lysine N-methyltransferase …	00310(Lysine degradation);04068(FoxO signaling pathway);04068(FoxO signaling pathway)	K11431	EC:2.1.1.43	SET domain containing 7, histone lysine methyltransferase [Source:HGNC Symbol;Acc:HGNC:30412]	protein_coding	5.45005	4.3506	4.04317	2.8677	5.03134	1.62181	3.55609	2.27959	3.76425	2.44683	3.29217	4.62222	2.04488	3.84114	2.02995	2.50529	8.15256	6.51234	6.4424	5.22824	4.3678	4.87344	4.57622	3.69449	0.612887	-0.706307	0.000551283	0.0487427	down	no
MSTRG.79328	BRINP1	ENST00000265922;ENST00000373964	GO:0001662(behavioral fear response);GO:0005515(protein binding);GO:0005737(cytoplasm);GO:0005783(endoplasmic reticulum);GO:0007049(cell cycle);GO:0007050(cell cycle arrest);GO:0007614(short-term memory);GO:0008219(cell death);GO:0030425(dendrite);GO:0035176(social behavior);GO:0035640(exploration behavior);GO:0042711(maternal behavior);GO:0043025(neuronal cell body);GO:0045666(positive regulatio…	NA	NA	NA	BMP/retinoic acid inducible neural specific 1 [Source:HGNC Symbol;Acc:HGNC:2687]	protein_coding	0	0.0484325	0.0994903	0.224948	0.140451	0.626132	0.156106	0	0.176927	0.132449	0	0.0140051	0.274323	0.135998	0.0384785	0.0451274	6.25604	0.280638	0.0825209	5.36325	0.275102	0	0.434193	1.92733	0.0722641	-3.79058	0.000560508	0.0492548	down	yes
MSTRG.6940	SLC16A1	ENST00000369626;ENST00000458229;ENST00000538576;ENST00000443580	GO:0005515(protein binding);GO:0005813(centrosome);GO:0005886(plasma membrane);GO:0005887(integral component of plasma membrane);GO:0006090(pyruvate metabolic process);GO:0006629(lipid metabolic process);GO:0007098(centrosome cycle);GO:0008028(monocarboxylic acid transmembrane transporter activity);GO:0009925(basal plasma membrane);GO:0015129(lactate transmembrane transporter activity);GO:0015130…	NA	K08179	NA	solute carrier family 16 member 1 [Source:HGNC Symbol;Acc:HGNC:10922]	protein_coding	1.24003	0.942272	0.890949	0.258114	0.670236	0.342602	0.49522	0.203166	0.564477	0.709037	0.491854	0.416668	0.337099	0.637484	0.205704	0.565876	1.43656	1.44485	1.15776	1.17362	1.74593	0.646744	0.877426	0.391391	0.505438	-0.984395	0.000560917	0.0492548	down	no
MSTRG.5761	SLC35D1	ENST00000235345	GO:0005461(UDP-glucuronic acid transmembrane transporter activity);GO:0005462(UDP-N-acetylglucosamine transmembrane transporter activity);GO:0005463(UDP-N-acetylgalactosamine transmembrane transporter activity);GO:0005783(endoplasmic reticulum);GO:0005789(endoplasmic reticulum membrane);GO:0005794(Golgi apparatus);GO:0006065(UDP-glucuronate biosynthetic process);GO:0008643(carbohydrate transport)…	NA	K15281	NA	solute carrier family 35 member D1 [Source:HGNC Symbol;Acc:HGNC:20800]	protein_coding	2.90092	2.00166	2.59137	1.62101	2.95562	1.01591	3.50687	1.69019	2.75639	2.18124	2.22036	1.69898	1.77897	2.87287	1.67469	2.09088	3.37457	3.28745	5.96412	3.24543	2.67437	4.59393	3.03337	2.26803	0.625111	-0.677815	0.000563413	0.0493291	down	no
MSTRG.72366	LRRC17	ENST00000339431;ENST00000249377;ENST00000455453	GO:0001503(ossification);GO:0005515(protein binding);GO:0005576(extracellular region);GO:0005615(extracellular space);GO:0031012(extracellular matrix);GO:0045671(negative regulation of osteoclast differentiation);GO:0048539(bone marrow development);GO:0048539(bone marrow development)	NA	NA	NA	leucine rich repeat containing 17 [Source:HGNC Symbol;Acc:HGNC:16895]	protein_coding	0.467147	0.505453	0.794587	0.205661	0.523284	0.395824	0.51865	0.246389	0.438534	0.410873	0.372667	0.343368	0.323704	0.514728	0.135753	0.377016	0.73395	1.5785	0.769902	1.27652	2.94911	0.350386	0.3406	0.179729	0.401876	-1.31518	0.000566407	0.0494947	down	yes
MSTRG.64098	SPOCK1	ENST00000282223;ENST00000394945;ENST00000505690	GO:0001558(regulation of cell growth);GO:0001764(neuron migration);GO:0004867(serine-type endopeptidase inhibitor activity);GO:0004869(cysteine-type endopeptidase inhibitor activity);GO:0005509(calcium ion binding);GO:0005515(protein binding);GO:0005576(extracellular region);GO:0005615(extracellular space);GO:0005737(cytoplasm);GO:0007155(cell adhesion);GO:0007399(nervous system development);GO:0…	NA	K08136	NA	SPARC (osteonectin), cwcv and kazal like domains proteoglycan 1 [Source:HGNC Symbol;Acc:HGNC:11251]	protein_coding	0.068532	0.0417486	0.200955	0.0089174	0.0928324	0.0195581	0.135358	0.0279263	0	0.0927763	0.0227599	0.414127	0	0.201582	0	0.121702	0.795872	1.60488	0.280703	0.30447	0.589322	0.356415	0.0781702	0.110512	0.175807	-2.50793	0.000567502	0.049512	down	yes
ENSG00000139364	TMEM132B	ENST00000299308;ENST00000613307	GO:0003674(molecular_function);GO:0005575(cellular_component);GO:0008150(biological_process);GO:0016020(membrane);GO:0016021(integral component of membrane);GO:0016021(integral component of membrane)	NA	K17599	NA	transmembrane protein 132B [Source:HGNC Symbol;Acc:HGNC:29397]	protein_coding	0.0405369	0.00865646	0.00796483	0.0378665	0.0623126	0.0234766	0.0351681	0.0410069	0.0197403	0.0206688	0.0106337	0.0104523	0.026159	0.0212731	0	0	0.0328979	0.0387033	0.0156882	0.00820641	0.12724	0.433808	0.0243789	0.322092	0.182408	-2.45476	0.000567708	0.049512	down	yes
MSTRG.45012	POTEF	ENST00000409914;ENST00000361163	GO:0001895(retina homeostasis);GO:0005515(protein binding);GO:0005615(extracellular space);GO:0005737(cytoplasm);GO:0005938(cell cortex);GO:0070062(extracellular exosome);GO:0072562(blood microparticle);GO:0072562(blood microparticle)	NA	K17299	NA	POTE ankyrin domain family member F [Source:HGNC Symbol;Acc:HGNC:33905]	protein_coding	0	0	0.0131152	0	0	0.00559182	0.017194	0	0	0	0	0	0.00127615	0	0.00352381	0.00343069	0	0.0262974	1.60611	0.00456565	0.00059003	0	0	0.000945031	0.0134671	-6.21442	0.000569997	0.0496633	down	yes
MSTRG.33009	SLC22A31	ENST00000562855;ENST00000614943	GO:0006811(ion transport);GO:0016020(membrane);GO:0016021(integral component of membrane);GO:0022857(transmembrane transporter activity);GO:0055085(transmembrane transport);GO:0055085(transmembrane transport)	NA	NA	NA	solute carrier family 22 member 31 [Source:HGNC Symbol;Acc:HGNC:27091]	protein_coding	36.5928	35.6888	22.7965	43.8948	15.2243	44.1568	47.7043	63.8416	28.8883	61.471	62.2559	22.126	41.29	32.5298	23.9233	35.9722	37.6538	23.4529	14.0892	16.9422	11.1952	30.0638	25.7505	19.5673	1.73001	0.790778	0.000582629	0.0503727	up	no
MSTRG.75551	PI15	ENST00000260113;ENST00000649643;ENST00000523773	GO:0005576(extracellular region);GO:0005615(extracellular space);GO:0007275(multicellular organism development);GO:0008150(biological_process);GO:0010466(negative regulation of peptidase activity);GO:0030414(peptidase inhibitor activity);GO:0070062(extracellular exosome);GO:0070062(extracellular exosome)	NA	NA	NA	peptidase inhibitor 15 [Source:HGNC Symbol;Acc:HGNC:8946]	protein_coding	0.0620976	0.0569629	0.0375618	0.0330456	0.0246743	0.0622174	0.0330052	0.0124239	0.0532073	0.126381	0	0.100427	0.0965196	0.0657413	0.070733	0.0760109	0.50644	0.270058	0.183165	0.0899784	0.512431	0.0206686	0.0251563	0.145971	0.259714	-1.945	0.000584037	0.0503973	down	no
MSTRG.35009	ACLY	ENST00000353196;ENST00000592970;ENST00000393896;ENST00000352035;ENST00000590151	GO:0000166(nucleotide binding);GO:0003824(catalytic activity);GO:0003878(ATP citrate synthase activity);GO:0005515(protein binding);GO:0005524(ATP binding);GO:0005576(extracellular region);GO:0005654(nucleoplasm);GO:0005737(cytoplasm);GO:0005829(cytosol);GO:0005886(plasma membrane);GO:0006085(acetyl-CoA biosynthetic process);GO:0006101(citrate metabolic process);GO:0006107(oxaloacetate metabolic …	00020(Citrate cycle (TCA cycle));00020(Citrate cycle (TCA cycle))	NA	NA	ATP citrate lyase [Source:HGNC Symbol;Acc:HGNC:115]	protein_coding	5.30207	7.02244	6.34537	3.613	5.37226	4.41592	4.1302	3.3588	4.9126	3.859	7.09866	6.47333	3.77331	5.68939	3.3683	4.3315	10.3018	6.89048	9.48872	6.986	6.65165	8.05799	6.08485	7.25256	0.640585	-0.642538	0.000585975	0.0504675	down	no
MSTRG.34347	BLMH	ENST00000261714;ENST00000577623;ENST00000581037	GO:0000209(protein polyubiquitination);GO:0004177(aminopeptidase activity);GO:0004180(carboxypeptidase activity);GO:0004197(cysteine-type endopeptidase activity);GO:0005515(protein binding);GO:0005634(nucleus);GO:0005737(cytoplasm);GO:0005829(cytosol);GO:0006508(proteolysis);GO:0008233(peptidase activity);GO:0008234(cysteine-type peptidase activity);GO:0009636(response to toxic substance);GO:0016…	NA	NA	NA	bleomycin hydrolase [Source:HGNC Symbol;Acc:HGNC:1059]	protein_coding	2.85738	2.24592	2.06973	1.45248	2.23729	1.58188	1.17297	0.953772	1.64191	2.32932	0.875092	1.15578	1.7644	1.56336	1.43144	1.9665	3.25923	2.28601	2.92628	2.1889	3.11309	5.67033	1.83294	2.93991	0.563645	-0.827141	0.000587124	0.0504696	down	no
MSTRG.63063	TTC37	ENST00000358746;ENST00000513823;ENST00000649566	GO:0005515(protein binding);GO:0005634(nucleus);GO:0005654(nucleoplasm);GO:0005737(cytoplasm);GO:0005829(cytosol);GO:0006401(RNA catabolic process);GO:0035327(transcriptionally active chromatin);GO:0043928(exonucleolytic catabolism of deadenylated mRNA);GO:0055087(Ski complex);GO:0055087(Ski complex)	03018(RNA degradation);03018(RNA degradation)	K12600	NA	tetratricopeptide repeat domain 37 [Source:HGNC Symbol;Acc:HGNC:23639]	protein_coding	4.81129	4.74361	4.5118	2.13213	4.21752	1.97129	4.18473	2.37937	2.73671	3.48146	3.48345	2.89261	2.25613	4.71283	2.17278	3.21529	5.91566	4.31422	4.77625	4.49655	4.14487	6.21148	3.96185	7.17273	0.657456	-0.605033	0.000595908	0.0510292	down	no
MSTRG.13207	MORN4	ENST00000307450;ENST00000478953;ENST00000370635	GO:0005515(protein binding);GO:0005737(cytoplasm);GO:0032420(stereocilium);GO:0032426(stereocilium tip);GO:0032433(filopodium tip);GO:0042995(cell projection);GO:0048678(response to axon injury);GO:0048678(response to axon injury)	NA	NA	NA	MORN repeat containing 4 [Source:HGNC Symbol;Acc:HGNC:24001]	protein_coding	0.6094	1.19514	1.33852	0.489425	0.781516	0.293083	1.52754	0.824877	1.21735	1.27072	1.01662	0.826945	0.61165	1.3092	0.774141	0.638407	3.28259	2.52687	1.66276	1.56503	0.876733	0.858083	1.33231	2.28585	0.511616	-0.966867	0.000600007	0.0511534	down	no
MSTRG.64962	NPM1	ENST00000393820;ENST00000296930;ENST00000517671;ENST00000521672;ENST00000351986	GO:0000055(ribosomal large subunit export from nucleus);GO:0000056(ribosomal small subunit export from nucleus);GO:0001046(core promoter sequence-specific DNA binding);GO:0003676(nucleic acid binding);GO:0003682(chromatin binding);GO:0003713(transcription coactivator activity);GO:0003723(RNA binding);GO:0004860(protein kinase inhibitor activity);GO:0005515(protein binding);GO:0005634(nucleus);GO:…	NA	K11276	NA	nucleophosmin 1 [Source:HGNC Symbol;Acc:HGNC:7910]	protein_coding	9.28907	8.03005	6.10144	3.47367	6.91656	2.84008	4.34033	3.22727	7.51457	5.24345	5.56571	5.51716	2.40419	6.5424	2.43819	4.02152	11.7107	11.1711	5.83403	6.76004	6.88185	6.21456	6.60916	26.8974	0.508448	-0.975827	0.000600043	0.0511534	down	no
MSTRG.61119	LRP2BP	ENST00000328559;ENST00000505916;ENST00000510776	GO:0005515(protein binding);GO:0005737(cytoplasm);GO:0005737(cytoplasm)	NA	NA	NA	LRP2 binding protein [Source:HGNC Symbol;Acc:HGNC:25434]	protein_coding	0.826284	1.37881	0.739015	1.1674	0.789267	0.535505	1.3629	0.801569	1.09283	0.745585	0.872098	0.42603	0.654229	0.223257	0.41962	0.770521	0.676805	0.371426	0.613689	0.504454	0.539664	0.348063	0.485342	0.464588	1.599	0.677174	0.000601349	0.0511534	up	no
MSTRG.15555	TMEM132A	ENST00000005286;ENST00000453848;ENST00000544065;ENST00000540112;ENST00000535480	GO:0000139(Golgi membrane);GO:0003674(molecular_function);GO:0005783(endoplasmic reticulum);GO:0005788(endoplasmic reticulum lumen);GO:0005789(endoplasmic reticulum membrane);GO:0005794(Golgi apparatus);GO:0008150(biological_process);GO:0016020(membrane);GO:0016021(integral component of membrane);GO:0043687(post-translational protein modification);GO:0044267(cellular protein metabolic process);GO…	NA	K17599	NA	transmembrane protein 132A [Source:HGNC Symbol;Acc:HGNC:31092]	protein_coding	2.41394	1.99025	1.04439	2.10777	1.82674	2.54911	1.21297	1.48083	1.22556	1.7668	1.42454	3.38178	2.21544	1.30854	1.53069	2.44133	9.1651	3.32974	5.75121	3.24174	2.81767	7.51254	2.12729	1.11811	0.426665	-1.22882	0.000602596	0.0511718	down	no
MSTRG.10202	HEATR1	ENST00000366581;ENST00000366579;ENST00000366582	GO:0000462(maturation of SSU-rRNA from tricistronic rRNA transcript (SSU-rRNA, 5.8S rRNA, LSU-rRNA));GO:0001650(fibrillar center);GO:0003723(RNA binding);GO:0005515(protein binding);GO:0005634(nucleus);GO:0005654(nucleoplasm);GO:0005730(nucleolus);GO:0005739(mitochondrion);GO:0006364(rRNA processing);GO:0016020(membrane);GO:0030515(snoRNA binding);GO:0030686(90S preribosome);GO:0032040(small-subu…	03008(Ribosome biogenesis in eukaryotes);03008(Ribosome biogenesis in eukaryotes)	K14550	NA	HEAT repeat containing 1 [Source:HGNC Symbol;Acc:HGNC:25517]	protein_coding	2.93522	3.44215	3.58094	1.30408	2.73488	2.23324	2.77736	1.55989	1.80052	3.43028	2.44323	2.73529	1.86412	3.07152	1.39241	2.1332	3.40755	3.69023	3.57031	3.85202	3.83395	4.95313	2.51505	4.50614	0.650188	-0.62107	0.000603469	0.0511718	down	no
MSTRG.10209	TOMM20	ENST00000366607	GO:0005515(protein binding);GO:0005739(mitochondrion);GO:0005740(mitochondrial envelope);GO:0005741(mitochondrial outer membrane);GO:0005742(mitochondrial outer membrane translocase complex);GO:0006605(protein targeting);GO:0006626(protein targeting to mitochondrion);GO:0006886(intracellular protein transport);GO:0014850(response to muscle activity);GO:0015031(protein transport);GO:0015450(P-P-bo…	NA	K17770	NA	translocase of outer mitochondrial membrane 20 [Source:HGNC Symbol;Acc:HGNC:20947]	protein_coding	16.7182	18.0972	22.3749	8.44532	14.4381	6.42398	11.3336	8.09667	7.34648	13.2369	12.4896	12.6527	6.62006	20.5996	6.97827	8.93734	18.0331	17.7816	17.4794	21.3416	14.3089	21.836	13.9926	71.8214	0.495407	-1.01331	0.000606725	0.051277	down	no
MSTRG.42310	CAD;ATRAID	ENST00000403525;ENST00000380171;ENST00000611786;ENST00000428460;ENST00000405489;ENST00000264705;ENST00000458503;ENST00000419744;ENST00000456311	GO:0000166(nucleotide binding);GO:0001889(liver development);GO:0003824(catalytic activity);GO:0004070(aspartate carbamoyltransferase activity);GO:0004088(carbamoyl-phosphate synthase (glutamine-hydrolyzing) activity);GO:0004151(dihydroorotase activity);GO:0004672(protein kinase activity);GO:0005524(ATP binding);GO:0005634(nucleus);GO:0005654(nucleoplasm);GO:0005737(cytoplasm);GO:0005829(cytosol)…	00240(Pyrimidine metabolism);00250(Alanine, aspartate and glutamate metabolism);00250(Alanine, aspartate and glutamate metabolism)	NA	NA	carbamoyl-phosphate synthetase 2, aspartate transcarbamylase, and dihydroorotase [Source:HGNC Symbol;Acc:HGNC:1424];all-trans retinoic acid induced differentiation factor [Source:HGNC Symbol;Acc:HGNC:24090]	protein_coding	5.55082	6.86594	6.03777	3.50462	5.01843	3.748	5.04333	4.20429	5.01881	4.70538	4.87394	4.87986	3.37995	6.86407	3.6002	4.00577	9.04734	7.65186	8.09828	6.31899	6.26135	6.84868	4.6179	8.16897	0.677922	-0.560809	0.000606802	0.051277	down	no
MSTRG.20148	NABP2	ENST00000341463;ENST00000380198;ENST00000399713;ENST00000267023;ENST00000447747	GO:0000724(double-strand break repair via homologous recombination);GO:0000784(nuclear chromosome, telomeric region);GO:0003676(nucleic acid binding);GO:0003677(DNA binding);GO:0003697(single-stranded DNA binding);GO:0005515(protein binding);GO:0005634(nucleus);GO:0005654(nucleoplasm);GO:0005829(cytosol);GO:0006281(DNA repair);GO:0006974(cellular response to DNA damage stimulus);GO:0007093(mitoti…	NA	NA	NA	nucleic acid binding protein 2 [Source:HGNC Symbol;Acc:HGNC:28412]	protein_coding	2.44594	2.85922	3.78063	1.80678	3.07644	1.19597	2.01327	1.2935	2.21408	2.0887	2.51106	2.0963	1.07943	1.94436	1.49966	1.87807	4.16198	2.54382	2.72755	2.42293	3.22221	5.88017	3.01647	4.21608	0.599184	-0.73893	0.000610985	0.0515335	down	no
MSTRG.15640	TUT1;EEF1G	ENST00000476907;ENST00000308436;ENST00000494385;ENST00000329251	GO:0000166(nucleotide binding);GO:0003676(nucleic acid binding);GO:0003723(RNA binding);GO:0003730(mRNA 3'-UTR binding);GO:0004652(polynucleotide adenylyltransferase activity);GO:0005515(protein binding);GO:0005524(ATP binding);GO:0005634(nucleus);GO:0005654(nucleoplasm);GO:0005730(nucleolus);GO:0005737(cytoplasm);GO:0005829(cytosol);GO:0005847(mRNA cleavage and polyadenylation specificity factor…	05134(Legionellosis)	K18709;K03233	2.7.7.52;EC:2.7.7.19	terminal uridylyl transferase 1, U6 snRNA-specific [Source:HGNC Symbol;Acc:HGNC:26184];eukaryotic translation elongation factor 1 gamma [Source:HGNC Symbol;Acc:HGNC:3213]	protein_coding	30.946	26.1149	28.9639	12.0797	24.1803	15.3422	22.7565	16.9655	25.1524	23.4654	15.563	18.639	9.06266	15.159	14.053	20.5851	48.0175	32.0617	31.5462	28.1884	30.8569	23.7328	25.5928	30.3413	0.637197	-0.650189	0.000622706	0.0523104	down	no
MSTRG.48988	MYBL2	ENST00000217026;ENST00000396863	GO:0000278(mitotic cell cycle);GO:0000976(transcription regulatory region sequence-specific DNA binding);GO:0000978(RNA polymerase II cis-regulatory region sequence-specific DNA binding);GO:0000981(DNA-binding transcription factor activity, RNA polymerase II-specific);GO:0001228(DNA-binding transcription activator activity, RNA polymerase II-specific);GO:0003677(DNA binding);GO:0003700(DNA-bindin…	04218(Cellular senescence);04218(Cellular senescence)	K21769	NA	MYB proto-oncogene like 2 [Source:HGNC Symbol;Acc:HGNC:7548]	protein_coding	1.18468	1.42693	0.626654	0.327931	0.331355	0.410944	0.813737	0.266419	0.571355	0.417571	0.383182	1.07503	0.438943	0.70354	1.42361	0.821467	2.02297	5.05356	1.12532	0.798463	1.8025	2.19534	0.793439	0.599486	0.389941	-1.35867	0.000627545	0.0525843	down	no
MSTRG.68585	DCBLD1	ENST00000338728;ENST00000296955	GO:0016020(membrane);GO:0016021(integral component of membrane);GO:0016021(integral component of membrane)	NA	NA	NA	discoidin, CUB and LCCL domain containing 1 [Source:HGNC Symbol;Acc:HGNC:21479]	protein_coding	1.0383	1.54932	1.162	0.726606	1.21776	0.727889	1.82974	0.90215	1.19143	0.783874	1.55249	0.678416	1.00416	0.784793	1.19846	1.83836	2.72321	1.90482	1.69775	0.934365	1.42442	4.64516	1.52624	3.19029	0.503865	-0.988891	0.000629935	0.0527353	down	no
MSTRG.50524	B3GALT5	ENST00000380620;ENST00000380618;ENST00000615480;ENST00000343118	GO:0000139(Golgi membrane);GO:0005515(protein binding);GO:0005783(endoplasmic reticulum);GO:0005794(Golgi apparatus);GO:0006486(protein glycosylation);GO:0008375(acetylglucosaminyltransferase activity);GO:0008376(acetylgalactosaminyltransferase activity);GO:0008499(UDP-galactose:beta-N-acetylglucosamine beta-1,3-galactosyltransferase activity);GO:0008532(N-acetyllactosaminide beta-1,3-N-acetylglu…	00601(Glycosphingolipid biosynthesis - lacto and neolacto series);00603(Glycosphingolipid biosynthesis - globo and isoglobo series);00603(Glycosphingolipid biosynthesis - globo and isoglobo series)	K03877	EC:2.4.1.-	beta-1,3-galactosyltransferase 5 [Source:HGNC Symbol;Acc:HGNC:920]	protein_coding	0.0164999	0.0357171	0.257297	0.0150201	0.0187119	0.0175288	0.0456619	0.0147371	0.0529932	0.0318066	0.816066	3.94945	0.109401	0.0114623	0.0299924	0.021307	0.0321511	0.0338147	0.0259922	0.125896	0.0423327	0.049104	0.0112997	0.0153338	8.10249	3.01837	0.000632385	0.0528074	up	no
MSTRG.56958	PSMD2	ENST00000310118;ENST00000417952;ENST00000439383	GO:0000165(MAPK cascade);GO:0000209(protein polyubiquitination);GO:0000502(proteasome complex);GO:0002223(stimulatory C-type lectin receptor signaling pathway);GO:0002479(antigen processing and presentation of exogenous peptide antigen via MHC class I, TAP-dependent);GO:0005515(protein binding);GO:0005576(extracellular region);GO:0005634(nucleus);GO:0005654(nucleoplasm);GO:0005829(cytosol);GO:000…	03050(Proteasome);05169(Epstein-Barr virus infection);05169(Epstein-Barr virus infection)	NA	NA	proteasome 26S subunit, non-ATPase 2 [Source:HGNC Symbol;Acc:HGNC:9559]	protein_coding	8.50191	7.91172	8.00708	5.06715	5.38151	3.62696	6.60009	3.26894	6.51237	5.87089	4.11285	4.47427	3.86161	6.68013	3.17244	4.83877	11.8701	10.1773	7.51086	8.14075	7.73121	8.80272	5.76377	7.83507	0.647844	-0.626283	0.000636111	0.0530352	down	no
MSTRG.65902	E2F3	ENST00000346618;ENST00000535432	GO:0000082(G1/S transition of mitotic cell cycle);GO:0000122(negative regulation of transcription by RNA polymerase II);GO:0000790(nuclear chromatin);GO:0000977(RNA polymerase II regulatory region sequence-specific DNA binding);GO:0000981(DNA-binding transcription factor activity, RNA polymerase II-specific);GO:0000987(cis-regulatory region sequence-specific DNA binding);GO:0001216(DNA-binding tr…	01522(Endocrine resistance);04110(Cell cycle);04218(Cellular senescence);04934(Cushing syndrome);05160(Hepatitis C);05161(Hepatitis B);05163(Human cytomegalovirus infection);05166(Human T-cell leukemia virus 1 infection);05167(Kaposi sarcoma-associated herpesvirus infection);05169(Epstein-Barr virus infection);05200(Pathways in cancer);05206(MicroRNAs in cancer);05212(Pancreatic cancer);05214(Gli…	K06620	NA	E2F transcription factor 3 [Source:HGNC Symbol;Acc:HGNC:3115]	protein_coding	2.8891	3.02237	0.923862	0.666053	1.70497	0.959897	1.4535	0.865302	1.31206	1.02986	2.28181	1.50315	0.734703	1.33572	1.20089	0.998813	3.14661	2.81395	2.697	2.4722	2.08557	2.49096	1.7787	3.75537	0.538645	-0.892592	0.000637619	0.053058	down	no
MSTRG.46109	DNAJC10	ENST00000264065;ENST00000616986;ENST00000537515;ENST00000613960;ENST00000640034	GO:0001671(ATPase activator activity);GO:0001933(negative regulation of protein phosphorylation);GO:0005515(protein binding);GO:0005783(endoplasmic reticulum);GO:0005788(endoplasmic reticulum lumen);GO:0015035(protein disulfide oxidoreductase activity);GO:0015036(disulfide oxidoreductase activity);GO:0016020(membrane);GO:0016021(integral component of membrane);GO:0016491(oxidoreductase activity);…	04141(Protein processing in endoplasmic reticulum);04141(Protein processing in endoplasmic reticulum)	K09530	NA	DnaJ heat shock protein family (Hsp40) member C10 [Source:HGNC Symbol;Acc:HGNC:24637]	protein_coding	2.19999	1.82729	1.59416	0.83035	1.88467	0.791324	1.43179	0.713787	1.15901	1.40218	1.33649	1.31805	0.663792	0.898354	0.851507	1.08769	4.80656	1.40051	1.85891	1.85986	2.00365	2.00363	1.23067	2.54695	0.564358	-0.825317	0.000641912	0.0532413	down	no
MSTRG.57032	CRYGS;TBCCD1	ENST00000392499;ENST00000307944;ENST00000413695;ENST00000338733;ENST00000430560;ENST00000424280	GO:0002009(morphogenesis of an epithelium);GO:0002088(lens development in camera-type eye);GO:0005212(structural constituent of eye lens);GO:0005515(protein binding);GO:0007601(visual perception);GO:0000902(cell morphogenesis);GO:0000922(spindle pole);GO:0005737(cytoplasm);GO:0005815(microtubule organizing center);GO:0005856(cytoskeleton);GO:0008360(regulation of cell shape);GO:0030334(regulation…	NA	K16810	NA	crystallin gamma S [Source:HGNC Symbol;Acc:HGNC:2417];TBCC domain containing 1 [Source:HGNC Symbol;Acc:HGNC:25546]	protein_coding	1.86246	1.90849	1.79578	0.993772	1.89914	1.04707	1.37745	0.785129	1.62049	1.55561	1.22582	1.21657	1.30968	1.34893	0.838031	1.18379	1.91484	2.06802	2.01699	2.28824	2.47028	2.101	1.53653	1.39799	0.695465	-0.52395	0.000643835	0.0532987	down	no
MSTRG.37076	TWSG1	ENST00000262120;ENST00000581641	GO:0001503(ossification);GO:0001707(mesoderm formation);GO:0001818(negative regulation of cytokine production);GO:0005515(protein binding);GO:0005576(extracellular region);GO:0005615(extracellular space);GO:0007179(transforming growth factor beta receptor signaling pathway);GO:0007275(multicellular organism development);GO:0007435(salivary gland morphogenesis);GO:0009888(tissue development);GO:00…	NA	NA	NA	twisted gastrulation BMP signaling modulator 1 [Source:HGNC Symbol;Acc:HGNC:12429]	protein_coding	2.95428	3.14369	3.229	1.80391	3.57927	1.2357	1.66129	1.05577	2.8211	1.97921	2.01149	2.47765	2.08304	2.36218	1.5101	2.46564	6.74057	4.73639	3.67854	3.26138	4.26026	3.03333	2.6657	2.27015	0.593437	-0.752833	0.000644386	0.0532987	down	no
MSTRG.14077	CYP2E1;SCART1	ENST00000463117;ENST00000252945;ENST00000541261;ENST00000640237	GO:0000139(Golgi membrane);GO:0002933(lipid hydroxylation);GO:0004497(monooxygenase activity);GO:0005506(iron ion binding);GO:0005737(cytoplasm);GO:0005739(mitochondrion);GO:0005743(mitochondrial inner membrane);GO:0005783(endoplasmic reticulum);GO:0005789(endoplasmic reticulum membrane);GO:0006082(organic acid metabolic process);GO:0006629(lipid metabolic process);GO:0006631(fatty acid metabolic…	00140(Steroid hormone biosynthesis);00590(Arachidonic acid metabolism);00591(Linoleic acid metabolism);00980(Metabolism of xenobiotics by cytochrome P450);00982(Drug metabolism - cytochrome P450);00983(Drug metabolism - other enzymes);04932(Non-alcoholic fatty liver disease (NAFLD));05204(Chemical carcinogenesis);05204(Chemical carcinogenesis)	K07415	EC:1.14.13.-	cytochrome P450 family 2 subfamily E member 1 [Source:HGNC Symbol;Acc:HGNC:2631];scavenger receptor family member expressed on T cells 1 [Source:HGNC Symbol;Acc:HGNC:32411]	protein_coding	0.934068	1.54083	1.29481	0.8784	1.06025	0.600488	0.748911	0.796176	0.839662	0.714962	0.471187	0.943864	1.62371	0.370967	0.914555	0.828058	0.243373	0.213571	0.618324	0.725629	0.657193	0.272304	1.18535	0.149987	1.79069	0.840513	0.000658569	0.0542718	up	no
MSTRG.68807	VNN2	ENST00000524919;ENST00000326499;ENST00000525270;ENST00000530536;ENST00000532012	GO:0005576(extracellular region);GO:0005886(plasma membrane);GO:0006807(nitrogen compound metabolic process);GO:0015939(pantothenate metabolic process);GO:0016020(membrane);GO:0016787(hydrolase activity);GO:0016811(hydrolase activity, acting on carbon-nitrogen (but not peptide) bonds, in linear amides);GO:0017159(pantetheine hydrolase activity);GO:0031225(anchored component of membrane);GO:003122…	00770(Pantothenate and CoA biosynthesis);00770(Pantothenate and CoA biosynthesis)	K08069	EC:3.5.1.92	vanin 2 [Source:HGNC Symbol;Acc:HGNC:12706]	protein_coding	1.19671	0.894055	1.15856	0.456296	0.930972	0.327155	0.578539	0.215275	0.86685	1.33865	0.677059	0.764038	0.573835	0.392851	0.221673	1.02579	1.16022	0.639571	2.62362	0.88276	1.87176	1.13679	1.58368	1.85427	0.494283	-1.01659	0.000659283	0.0542807	down	no
MSTRG.17962	NTM	ENST00000416661;ENST00000539799;ENST00000436745;ENST00000374784;ENST00000374791;ENST00000457381;ENST00000425719;ENST00000374786;ENST00000427481	GO:0005515(protein binding);GO:0005576(extracellular region);GO:0005886(plasma membrane);GO:0007155(cell adhesion);GO:0008038(neuron recognition);GO:0016020(membrane);GO:0031225(anchored component of membrane);GO:0031225(anchored component of membrane)	NA	K06774	NA	neurotrimin [Source:HGNC Symbol;Acc:HGNC:17941]	protein_coding	0.621084	3.81008	0.0631525	0.822326	0.555621	0.785052	0.118169	0.530006	0.206492	0.0111468	0.0330999	0.226127	0.947695	4.0473	0.738373	0.394905	0.256488	0.541245	0.254255	0.128943	0.130133	0.206268	0.0525889	0.0621068	4.26176	2.09145	0.000663361	0.0545165	up	no
MSTRG.26873	AMN	ENST00000559525;ENST00000299155	GO:0005102(signaling receptor binding);GO:0005576(extracellular region);GO:0005615(extracellular space);GO:0005768(endosome);GO:0005886(plasma membrane);GO:0005905(clathrin-coated pit);GO:0006898(receptor-mediated endocytosis);GO:0007275(multicellular organism development);GO:0007588(excretion);GO:0008104(protein localization);GO:0009235(cobalamin metabolic process);GO:0010008(endosome membrane);…	NA	K18259	NA	amnion associated transmembrane protein [Source:HGNC Symbol;Acc:HGNC:14604]	protein_coding	1.22274	0.98297	0.530838	2.95873	0.917076	2.33232	0.846504	0.502632	1.88173	2.01179	2.32257	1.62415	1.95893	2.43224	1.25046	0.430348	0.519222	0.128716	0.530823	0.73743	0.503384	2.01679	0.494134	0.602436	2.18745	1.12925	0.000666428	0.0546684	up	no
MSTRG.2487	PHF6	ENST00000332070;ENST00000370799;ENST00000370803;ENST00000370800;ENST00000625464	GO:0000122(negative regulation of transcription by RNA polymerase II);GO:0000775(chromosome, centromeric region);GO:0000776(kinetochore);GO:0000777(condensed chromosome kinetochore);GO:0001227(DNA-binding transcription repressor activity, RNA polymerase II-specific);GO:0001835(blastocyst hatching);GO:0003677(DNA binding);GO:0003723(RNA binding);GO:0005515(protein binding);GO:0005634(nucleus);GO:0…	NA	K23310	NA	PHD finger protein 6 [Source:HGNC Symbol;Acc:HGNC:18145]	protein_coding	1.82821	1.86817	2.13466	0.662801	1.89698	0.625289	1.35216	0.614475	1.06343	1.47144	1.91672	1.2208	0.863617	1.45166	1.0735	1.39344	2.50649	2.53935	1.52995	2.10736	2.07501	2.95355	1.47594	2.65855	0.600614	-0.73549	0.00066736	0.0546949	down	no
MSTRG.18899	CMAS	ENST00000229329;ENST00000538498	GO:0005634(nucleus);GO:0005654(nucleoplasm);GO:0006054(N-acetylneuraminate metabolic process);GO:0008781(N-acylneuraminate cytidylyltransferase activity);GO:0016020(membrane);GO:0016740(transferase activity);GO:0016779(nucleotidyltransferase activity);GO:0016779(nucleotidyltransferase activity)	00520(Amino sugar and nucleotide sugar metabolism);00520(Amino sugar and nucleotide sugar metabolism)	K21749	2.7.7.92;EC:2.7.7.43	cytidine monophosphate N-acetylneuraminic acid synthetase [Source:HGNC Symbol;Acc:HGNC:18290]	protein_coding	3.23861	3.17834	2.31013	2.40546	1.7614	1.53919	2.11398	1.7237	1.4254	2.58526	1.82158	1.70641	2.38933	2.75993	1.21652	1.57935	4.12894	4.18686	3.52033	2.95357	2.56654	3.98789	2.75745	3.44228	0.612743	-0.706647	0.000709894	0.0573946	down	no
MSTRG.13214	SFRP5	ENST00000266066	GO:0005515(protein binding);GO:0005576(extracellular region);GO:0005615(extracellular space);GO:0006915(apoptotic process);GO:0007163(establishment or maintenance of cell polarity);GO:0007165(signal transduction);GO:0007275(multicellular organism development);GO:0007601(visual perception);GO:0008285(negative regulation of cell population proliferation);GO:0009653(anatomical structure morphogenesi…	04310(Wnt signaling pathway)	K02222	NA	secreted frizzled related protein 5 [Source:HGNC Symbol;Acc:HGNC:10779]	protein_coding	1.37389	0.931548	1.04775	1.5176	2.27654	3.44465	1.07218	0.687268	0.738496	9.83761	0.26438	0.087061	0.985328	0.401784	0.646442	2.67752	0.445684	0.207546	0.141789	1.31303	0.405188	0.114381	1.41297	0.119381	3.36421	1.75027	0.000711684	0.0574876	up	no
MSTRG.15660	POLR2G	ENST00000301788;ENST00000533442	GO:0000291(nuclear-transcribed mRNA catabolic process, exonucleolytic);GO:0000398(mRNA splicing, via spliceosome);GO:0000932(P-body);GO:0003676(nucleic acid binding);GO:0003697(single-stranded DNA binding);GO:0003723(RNA binding);GO:0003727(single-stranded RNA binding);GO:0003899(DNA-directed 5'-3' RNA polymerase activity);GO:0005515(protein binding);GO:0005634(nucleus);GO:0005654(nucleoplasm);GO…	03020(RNA polymerase);05016(Huntington disease);05016(Huntington disease)	NA	NA	RNA polymerase II subunit G [Source:HGNC Symbol;Acc:HGNC:9194]	protein_coding	5.8452	7.12526	5.63174	3.02348	6.25965	2.70743	5.24954	2.80964	5.06366	5.18866	4.42822	4.99481	2.83333	3.39872	2.43778	4.24256	9.21783	6.89989	7.47467	6.65723	6.65705	9.6747	5.54734	3.83158	0.63652	-0.651722	0.000712881	0.0575325	down	no
MSTRG.8036	COPA	ENST00000647683;ENST00000241704;ENST00000649676;ENST00000368069	GO:0000139(Golgi membrane);GO:0003729(mRNA binding);GO:0005179(hormone activity);GO:0005198(structural molecule activity);GO:0005515(protein binding);GO:0005576(extracellular region);GO:0005615(extracellular space);GO:0005737(cytoplasm);GO:0005789(endoplasmic reticulum membrane);GO:0005794(Golgi apparatus);GO:0005829(cytosol);GO:0006886(intracellular protein transport);GO:0006888(endoplasmic reti…	NA	NA	NA	COPI coat complex subunit alpha [Source:HGNC Symbol;Acc:HGNC:2230]	protein_coding	11.6737	13.4409	13.0146	5.8858	10.4205	5.86337	10.4832	5.1947	8.3059	8.24701	9.78265	8.33931	4.31241	11.891	4.85178	6.94878	13.9439	15.9428	12.8954	11.002	10.2526	21.0185	9.70013	17.9153	0.615314	-0.700604	0.000714197	0.0575352	down	no
MSTRG.28159	TMOD2	ENST00000249700;ENST00000435126;ENST00000539962	GO:0003779(actin binding);GO:0005523(tropomyosin binding);GO:0005737(cytoplasm);GO:0005856(cytoskeleton);GO:0005865(striated muscle thin filament);GO:0006936(muscle contraction);GO:0007015(actin filament organization);GO:0007270(neuron-neuron synaptic transmission);GO:0007399(nervous system development);GO:0007611(learning or memory);GO:0030016(myofibril);GO:0030239(myofibril assembly);GO:0030426…	NA	K10370	NA	tropomodulin 2 [Source:HGNC Symbol;Acc:HGNC:11872]	protein_coding	0.28731	1.01943	0.99078	0.616761	1.51772	0.485447	0.348399	0.315538	0.668577	0.849497	0.24173	0.395324	0.615547	0.604751	0.552712	1.17655	1.74592	1.03899	1.59263	1.48064	1.96017	1.39702	0.867738	0.934048	0.484974	-1.04402	0.000717259	0.057696	down	no
MSTRG.20005	MYG1	ENST00000267103;ENST00000549488	GO:0003674(molecular_function);GO:0004518(nuclease activity);GO:0005515(protein binding);GO:0005634(nucleus);GO:0005654(nucleoplasm);GO:0005730(nucleolus);GO:0005737(cytoplasm);GO:0005739(mitochondrion);GO:0005759(mitochondrial matrix);GO:0016787(hydrolase activity);GO:0035641(locomotory exploration behavior);GO:0090305(nucleic acid phosphodiester bond hydrolysis);GO:0090305(nucleic acid phosphod…	NA	NA	NA	MYG1 exonuclease [Source:HGNC Symbol;Acc:HGNC:17590]	protein_coding	2.89398	2.84108	3.33729	1.73995	2.41951	1.32724	2.49908	1.78804	2.93893	2.34817	1.77653	1.58411	1.72374	2.59349	1.55568	1.80687	3.09787	2.69655	3.40854	2.73205	3.08214	4.05371	2.89231	3.44787	0.692095	-0.530958	0.000717479	0.057696	down	no
MSTRG.14009	PWWP2B	ENST00000305233;ENST00000631148	GO:0005515(protein binding);GO:0005654(nucleoplasm);GO:0005654(nucleoplasm)	NA	NA	NA	PWWP domain containing 2B [Source:HGNC Symbol;Acc:HGNC:25150]	protein_coding	1.83911	3.27025	3.14146	3.95824	1.33155	1.96129	2.74918	5.65206	2.41936	1.63509	5.39167	5.04253	4.23779	2.72476	5.17828	2.0993	1.51756	2.17248	1.38198	2.90395	2.40408	0.50462	2.2254	1.68304	1.77893	0.831011	0.000725161	0.0580537	up	no
MSTRG.430	DDX53	ENST00000327968	GO:0000166(nucleotide binding);GO:0003676(nucleic acid binding);GO:0003723(RNA binding);GO:0003724(RNA helicase activity);GO:0004386(helicase activity);GO:0005524(ATP binding);GO:0005634(nucleus);GO:0005654(nucleoplasm);GO:0005730(nucleolus);GO:0005829(cytosol);GO:0016787(hydrolase activity);GO:0043231(intracellular membrane-bounded organelle)	NA	K21869	EC:3.6.4.13	DEAD-box helicase 53 [Source:HGNC Symbol;Acc:HGNC:20083]	protein_coding	0.12281	0	0.023708	0.059323	0.046466	0.664969	0.103033	0.089597	0.18828	0.111181	0.003633	0	0.145349	0	0.027192	0.071177	0.020969	0	0.008817	0.021023	0.036575	0.011118	0.029787	0	6.45698	2.69086	0.000726872	0.0581388	up	no
MSTRG.5793	LRRC40	ENST00000370952	GO:0004722(protein serine/threonine phosphatase activity);GO:0005515(protein binding);GO:0005737(cytoplasm);GO:0006470(protein dephosphorylation);GO:0007165(signal transduction);GO:0016020(membrane);GO:0043231(intracellular membrane-bounded organelle)	NA	NA	NA	leucine rich repeat containing 40 [Source:HGNC Symbol;Acc:HGNC:26004]	protein_coding	1.91149	1.71929	1.53663	0.823469	1.70866	0.711007	1.55649	0.646961	1.17389	1.07028	1.04998	0.698659	0.77928	1.34261	0.788699	1.23677	2.29877	2.18845	1.4709	1.80778	1.81426	2.06147	1.60554	1.38879	0.640687	-0.642307	0.000728865	0.0582056	down	no
MSTRG.2535	MMGT1	ENST00000305963	GO:0000139(Golgi membrane);GO:0005515(protein binding);GO:0005737(cytoplasm);GO:0005768(endosome);GO:0005769(early endosome);GO:0005783(endoplasmic reticulum);GO:0005789(endoplasmic reticulum membrane);GO:0005794(Golgi apparatus);GO:0005886(plasma membrane);GO:0006812(cation transport);GO:0006824(cobalt ion transport);GO:0006825(copper ion transport);GO:0006826(iron ion transport);GO:0015087(coba…	NA	NA	NA	membrane magnesium transporter 1 [Source:HGNC Symbol;Acc:HGNC:28100]	protein_coding	6.23443	5.67176	7.10427	2.72335	7.41589	2.15815	4.61902	2.55486	3.47358	4.30714	4.99486	5.2871	2.83044	5.26464	3.40758	4.24918	7.48135	7.20312	6.95531	7.2302	5.17263	6.98814	5.15774	13.0648	0.610061	-0.712975	0.000729004	0.0582056	down	no
MSTRG.62403	TAF9;AK6	ENST00000328663;ENST00000509462;ENST00000380822;ENST00000618980;ENST00000217893;ENST00000512152;ENST00000506736;ENST00000380818;ENST00000508954	GO:0000124(SAGA complex);GO:0000125(PCAF complex);GO:0000492(box C/D snoRNP assembly);GO:0000976(transcription regulatory region sequence-specific DNA binding);GO:0002039(p53 binding);GO:0003677(DNA binding);GO:0003713(transcription coactivator activity);GO:0004402(histone acetyltransferase activity);GO:0005515(protein binding);GO:0005634(nucleus);GO:0005654(nucleoplasm);GO:0005669(transcription …	03022(Basal transcription factors);00230(Purine metabolism);03008(Ribosome biogenesis in eukaryotes);03022(Basal transcription factors)	K14535;K18532	EC:2.7.4.3	TATA-box binding protein associated factor 9 [Source:HGNC Symbol;Acc:HGNC:11542];adenylate kinase 6 [Source:HGNC Symbol;Acc:HGNC:49151]	protein_coding	2.3226	1.25502	1.19055	0.806855	1.2719	0.78752	1.67049	0.796662	1.4183	1.48013	1.62006	1.61942	0.985595	1.89961	0.713188	0.895769	2.85934	1.85952	1.65175	1.85153	2.05679	2.12267	1.24059	4.29357	0.577998	-0.790863	0.000732862	0.0582294	down	no
MSTRG.1641	COX7B	ENST00000650309;ENST00000373335;ENST00000475465;ENST00000647835	GO:0004129(cytochrome-c oxidase activity);GO:0005515(protein binding);GO:0005739(mitochondrion);GO:0005743(mitochondrial inner membrane);GO:0005746(mitochondrial respirasome);GO:0006119(oxidative phosphorylation);GO:0006123(mitochondrial electron transport, cytochrome c to oxygen);GO:0007417(central nervous system development);GO:0016020(membrane);GO:0016021(integral component of membrane);GO:002…	00190(Oxidative phosphorylation);04260(Cardiac muscle contraction);04714(Thermogenesis);04932(Non-alcoholic fatty liver disease (NAFLD));05010(Alzheimer disease);05012(Parkinson disease);05016(Huntington disease);05016(Huntington disease)	NA	NA	cytochrome c oxidase subunit 7B [Source:HGNC Symbol;Acc:HGNC:2291]	protein_coding	2.01248	1.79836	1.85478	0.742827	1.84394	0.561781	0.732314	0.310218	1.43544	1.51171	1.61345	1.40315	0.540091	1.129	0.451176	1.46199	2.65326	2.70076	1.89093	2.5908	1.36898	2.10517	1.75286	3.4791	0.523214	-0.934528	0.000733126	0.0582294	down	no
MSTRG.41859	CPSF3	ENST00000238112;ENST00000460593;ENST00000475482	GO:0000398(mRNA splicing, via spliceosome);GO:0003723(RNA binding);GO:0004518(nuclease activity);GO:0004519(endonuclease activity);GO:0004521(endoribonuclease activity);GO:0005515(protein binding);GO:0005634(nucleus);GO:0005654(nucleoplasm);GO:0005847(mRNA cleavage and polyadenylation specificity factor complex);GO:0006369(termination of RNA polymerase II transcription);GO:0006378(mRNA polyadenyl…	03015(mRNA surveillance pathway);03015(mRNA surveillance pathway)	K14403	EC:3.1.27.-	cleavage and polyadenylation specific factor 3 [Source:HGNC Symbol;Acc:HGNC:2326]	protein_coding	3.11224	2.71311	2.18298	0.733466	1.80287	0.837905	1.29935	0.964552	1.49625	1.17293	2.49033	2.0265	0.77493	1.5979	0.640765	1.0949	4.45624	2.52044	3.7411	2.43776	2.09792	2.76917	1.55881	4.03388	0.528068	-0.921205	0.000736813	0.0583026	down	no
MSTRG.1470	RPS4X	ENST00000316084	GO:0000184(nuclear-transcribed mRNA catabolic process, nonsense-mediated decay);GO:0003723(RNA binding);GO:0003735(structural constituent of ribosome);GO:0005515(protein binding);GO:0005654(nucleoplasm);GO:0005737(cytoplasm);GO:0005829(cytosol);GO:0005840(ribosome);GO:0005844(polysome);GO:0005925(focal adhesion);GO:0006412(translation);GO:0006413(translational initiation);GO:0006614(SRP-dependent…	03010(Ribosome)	K02987	NA	ribosomal protein S4 X-linked [Source:HGNC Symbol;Acc:HGNC:10424]	protein_coding	64.7898	59.7504	86.3328	17.6662	45.5621	27.6319	54.1001	33.3393	40.7407	45.9639	25.5529	27.821	22.4716	117.485	29.8426	44.2365	100.085	136.574	81.2326	100.552	85.378	49.8614	61.4305	88.141	0.528462	-0.920128	0.000738337	0.0583026	down	no
MSTRG.42178	SF3B6	ENST00000233468	GO:0000398(mRNA splicing, via spliceosome);GO:0001825(blastocyst formation);GO:0003676(nucleic acid binding);GO:0003723(RNA binding);GO:0003729(mRNA binding);GO:0005515(protein binding);GO:0005634(nucleus);GO:0005654(nucleoplasm);GO:0005681(spliceosomal complex);GO:0005684(U2-type spliceosomal complex);GO:0005686(U2 snRNP);GO:0005689(U12-type spliceosomal complex);GO:0006397(mRNA processing);GO:0…	03040(Spliceosome)	K12833	NA	splicing factor 3b subunit 6 [Source:HGNC Symbol;Acc:HGNC:30096]	protein_coding	8.80522	7.72061	8.21261	2.43206	6.79598	1.71856	3.7865	1.81407	4.15481	3.78977	6.06466	5.61194	2.42081	5.67646	1.95312	4.0626	14.2184	8.95584	8.63866	7.21663	5.76603	9.33755	4.0509	15.4909	0.509127	-0.973903	0.000738933	0.0583026	down	no
MSTRG.1084	UBQLN2	ENST00000338222	GO:0000045(autophagosome assembly);GO:0005515(protein binding);GO:0005634(nucleus);GO:0005737(cytoplasm);GO:0005776(autophagosome);GO:0005829(cytosol);GO:0005886(plasma membrane);GO:0006511(ubiquitin-dependent protein catabolic process);GO:0006914(autophagy);GO:0016020(membrane);GO:0016241(regulation of macroautophagy);GO:0030433(ubiquitin-dependent ERAD pathway);GO:0031410(cytoplasmic vesicle);G…	04141(Protein processing in endoplasmic reticulum)	K04523	NA	ubiquilin 2 [Source:HGNC Symbol;Acc:HGNC:12509]	protein_coding	5.17803	6.28767	6.03954	3.16489	4.86528	3.46138	6.18612	3.41293	5.02835	5.39766	5.86809	5.24686	3.03993	4.5171	2.33758	5.3041	9.95435	6.98686	6.63455	7.2944	6.28085	6.65077	5.9523	5.82481	0.677735	-0.561207	0.000744812	0.0584281	down	no
MSTRG.6998	PTPN22	ENST00000528414;ENST00000538253;ENST00000420377;ENST00000359785	GO:0002230(positive regulation of defense response to virus by host);GO:0002376(immune system process);GO:0002685(regulation of leukocyte migration);GO:0004721(phosphoprotein phosphatase activity);GO:0004725(protein tyrosine phosphatase activity);GO:0004726(non-membrane spanning protein tyrosine phosphatase activity);GO:0005515(protein binding);GO:0005634(nucleus);GO:0005737(cytoplasm);GO:0005829…	NA	K18024	EC:3.1.3.48	protein tyrosine phosphatase non-receptor type 22 [Source:HGNC Symbol;Acc:HGNC:9652]	protein_coding	2.3585	1.66822	1.43428	0.606885	1.5536	0.770224	1.33498	0.419888	0.937724	1.40524	1.00193	0.84885	0.627697	0.729413	0.624272	1.42655	1.84826	1.61611	1.42472	2.09714	2.30307	1.29016	1.52339	4.55639	0.532685	-0.908646	0.000750669	0.0587334	down	no
MSTRG.6186	COL24A1	ENST00000370571;ENST00000496682	GO:0005201(extracellular matrix structural constituent);GO:0005515(protein binding);GO:0005576(extracellular region);GO:0005581(collagen trimer);GO:0005615(extracellular space);GO:0005788(endoplasmic reticulum lumen);GO:0030020(extracellular matrix structural constituent conferring tensile strength);GO:0030198(extracellular matrix organization);GO:0031012(extracellular matrix);GO:0062023(collagen…	04974(Protein digestion and absorption);04974(Protein digestion and absorption)	K19721	NA	collagen type XXIV alpha 1 chain [Source:HGNC Symbol;Acc:HGNC:20821]	protein_coding	0.311748	0.340714	0.211515	0.218892	0.310834	0.144762	0.242091	0.116723	0.325258	0.180802	0.195865	0.147762	0.176059	0.116244	0.150673	0.332639	0.45791	0.883841	0.274149	0.259485	0.392573	0.758008	0.345641	0.16737	0.497683	-1.0067	0.000751941	0.0587817	down	no
MSTRG.4015	PAQR7	ENST00000675840;ENST00000374296	GO:0003707(steroid hormone receptor activity);GO:0005496(steroid binding);GO:0005515(protein binding);GO:0005886(plasma membrane);GO:0007275(multicellular organism development);GO:0008289(lipid binding);GO:0016020(membrane);GO:0016021(integral component of membrane);GO:0030154(cell differentiation);GO:0038023(signaling receptor activity);GO:0043401(steroid hormone mediated signaling pathway);GO:0…	NA	NA	NA	progestin and adipoQ receptor family member 7 [Source:HGNC Symbol;Acc:HGNC:23146]	protein_coding	4.2745	4.11147	4.70218	2.77843	3.81551	1.65492	4.53656	2.55513	2.71004	2.55032	2.24489	6.53305	2.41614	3.68363	2.95379	2.35411	6.10736	4.90818	6.34331	5.76109	5.3912	4.2421	8.91677	3.65202	0.594354	-0.750606	0.000764621	0.0596172	down	no
MSTRG.66992	VEGFA	ENST00000372077;ENST00000520948;ENST00000672860;ENST00000519767;ENST00000523950;ENST00000518689;ENST00000425836;ENST00000230480;ENST00000372064;ENST00000372055;ENST00000413642	GO:0000122(negative regulation of transcription by RNA polymerase II);GO:0001525(angiogenesis);GO:0001541(ovarian follicle development);GO:0001569(branching involved in blood vessel morphogenesis);GO:0001570(vasculogenesis);GO:0001666(response to hypoxia);GO:0001701(in utero embryonic development);GO:0001822(kidney development);GO:0001934(positive regulation of protein phosphorylation);GO:0001938…	01521(EGFR tyrosine kinase inhibitor resistance);04010(MAPK signaling pathway);04014(Ras signaling pathway);04015(Rap1 signaling pathway);04066(HIF-1 signaling pathway);04151(PI3K-Akt signaling pathway);04370(VEGF signaling pathway);04510(Focal adhesion);04926(Relaxin signaling pathway);04933(AGE-RAGE signaling pathway in diabetic complications);05163(Human cytomegalovirus infection);05165(Human …	K05448	NA	vascular endothelial growth factor A [Source:HGNC Symbol;Acc:HGNC:12680]	protein_coding	2.39391	5.41529	4.72266	4.42892	12.9763	4.87236	2.49961	2.68956	8.029	2.03603	4.07672	7.7455	3.81312	2.66735	4.39307	2.35294	47.4623	18.22	6.11554	5.21969	6.07589	12.1697	4.87193	4.06087	0.360438	-1.47218	0.000768431	0.0597068	down	no
MSTRG.9852	H3-3A	ENST00000366813;ENST00000366814;ENST00000661429;ENST00000366816;ENST00000667897;ENST00000655399;ENST00000366815	GO:0000183(chromatin silencing at rDNA);GO:0000228(nuclear chromosome);GO:0000784(nuclear chromosome, telomeric region);GO:0000786(nucleosome);GO:0000788(nuclear nucleosome);GO:0000978(RNA polymerase II cis-regulatory region sequence-specific DNA binding);GO:0000979(RNA polymerase II core promoter sequence-specific DNA binding);GO:0001649(osteoblast differentiation);GO:0001740(Barr body);GO:00036…	05034(Alcoholism);05202(Transcriptional misregulation in cancer);05322(Systemic lupus erythematosus);05322(Systemic lupus erythematosus)	K11253	NA	H3.3 histone A [Source:HGNC Symbol;Acc:HGNC:4764]	protein_coding	15.1679	18.0398	19.2475	5.70092	13.89	4.9987	12.7384	6.83807	7.53082	11.6277	16.1755	15.5954	6.29955	16.038	5.28893	8.59843	15.7516	23.0519	17.4906	19.4205	14.0046	30.3295	14.386	28.9423	0.562429	-0.830258	0.000775934	0.0600817	down	no
MSTRG.66200	H4C12	ENST00000611927	GO:0000183(chromatin silencing at rDNA);GO:0000228(nuclear chromosome);GO:0000784(nuclear chromosome, telomeric region);GO:0000786(nucleosome);GO:0000788(nuclear nucleosome);GO:0003677(DNA binding);GO:0003723(RNA binding);GO:0005515(protein binding);GO:0005576(extracellular region);GO:0005634(nucleus);GO:0005654(nucleoplasm);GO:0005694(chromosome);GO:0006303(double-strand break repair via nonhomo…	05034(Alcoholism);05203(Viral carcinogenesis);05322(Systemic lupus erythematosus)	K11254	NA	H4 clustered histone 12 [Source:HGNC Symbol;Acc:HGNC:4784]	protein_coding	30.5404	33.9839	21.2225	11.9721	17.4981	12.5233	30.1114	27.0153	18.6906	24.2216	30.6564	33.0947	11.8749	24.6455	25.2844	21.8198	44.4141	36.2666	33.8868	38.5147	40.3369	48.2681	29.5885	41.3279	0.600049	-0.736848	0.000782429	0.0604802	down	no
MSTRG.64973	SH3PXD2B	ENST00000311601;ENST00000519643;ENST00000518522;ENST00000636523	GO:0001501(skeletal system development);GO:0001654(eye development);GO:0002051(osteoblast fate commitment);GO:0002102(podosome);GO:0005515(protein binding);GO:0005737(cytoplasm);GO:0006801(superoxide metabolic process);GO:0007507(heart development);GO:0010314(phosphatidylinositol-5-phosphate binding);GO:0010628(positive regulation of gene expression);GO:0016176(superoxide-generating NADPH oxidase…	NA	NA	NA	SH3 and PX domains 2B [Source:HGNC Symbol;Acc:HGNC:29242]	protein_coding	4.1734	0.844749	3.40301	2.64532	1.18261	2.63957	2.48868	1.57335	2.04482	3.42514	0.484885	2.47058	2.00163	2.7923	1.46357	1.6624	4.67442	8.16211	9.95994	3.79464	7.40336	2.22125	0.969602	5.97338	0.408909	-1.29015	0.000787484	0.0606619	down	no
MSTRG.31898	ARL2BP	ENST00000219204;ENST00000563234	GO:0003713(transcription coactivator activity);GO:0005515(protein binding);GO:0005634(nucleus);GO:0005737(cytoplasm);GO:0005739(mitochondrion);GO:0005758(mitochondrial intermembrane space);GO:0005759(mitochondrial matrix);GO:0005813(centrosome);GO:0005815(microtubule organizing center);GO:0005819(spindle);GO:0005829(cytosol);GO:0005856(cytoskeleton);GO:0005929(cilium);GO:0007165(signal transducti…	NA	K16742	NA	ADP ribosylation factor like GTPase 2 binding protein [Source:HGNC Symbol;Acc:HGNC:17146]	protein_coding	4.86367	3.60977	5.49451	2.47851	4.50479	2.22545	6.00619	2.28495	2.41267	4.96104	4.86887	4.86533	3.29258	4.54428	2.38533	4.26801	9.28973	4.85119	9.13529	7.67101	5.37292	5.12878	4.14014	5.72509	0.614508	-0.702495	0.000791173	0.0607765	down	no
MSTRG.58757	KDR	ENST00000263923	GO:0000166(nucleotide binding);GO:0001525(angiogenesis);GO:0001569(branching involved in blood vessel morphogenesis);GO:0001570(vasculogenesis);GO:0001934(positive regulation of protein phosphorylation);GO:0001938(positive regulation of endothelial cell proliferation);GO:0002042(cell migration involved in sprouting angiogenesis);GO:0002244(hematopoietic progenitor cell differentiation);GO:0003158…	01521(EGFR tyrosine kinase inhibitor resistance);04010(MAPK signaling pathway);04014(Ras signaling pathway);04015(Rap1 signaling pathway);04151(PI3K-Akt signaling pathway);04370(VEGF signaling pathway);04510(Focal adhesion);05205(Proteoglycans in cancer);05418(Fluid shear stress and atherosclerosis)	K05098	EC:2.7.10.1	kinase insert domain receptor [Source:HGNC Symbol;Acc:HGNC:6307]	protein_coding	4.35565	5.33949	5.21064	3.22187	9.15821	4.0864	3.0314	1.78372	2.12479	3.07238	1.72703	3.54103	5.05039	5.39216	4.44867	2.30391	15.9622	13.7517	18.713	7.15006	10.1556	2.14636	4.75974	3.11244	0.421432	-1.24663	0.000801794	0.0612908	down	no
MSTRG.48023	ISM1	ENST00000262487	GO:0005576(extracellular region);GO:0016525(negative regulation of angiogenesis)	NA	NA	NA	isthmin 1 [Source:HGNC Symbol;Acc:HGNC:16213]	protein_coding	1.1906	2.08308	0.561625	1.47591	1.09961	0.67752	0.960439	1.11708	1.43321	1.05831	0.516913	1.31197	0.680092	0.817123	1.07892	2.40383	2.50881	4.12129	3.30643	2.13773	2.02469	2.13385	2.56886	0.756971	0.472074	-1.08292	0.000802857	0.0613051	down	no
MSTRG.7684	ILF2	ENST00000368681;ENST00000361891;ENST00000615950;ENST00000368684	GO:0003677(DNA binding);GO:0003723(RNA binding);GO:0003725(double-stranded RNA binding);GO:0005515(protein binding);GO:0005524(ATP binding);GO:0005576(extracellular region);GO:0005634(nucleus);GO:0005654(nucleoplasm);GO:0005730(nucleolus);GO:0005737(cytoplasm);GO:0006955(immune response);GO:0016020(membrane);GO:0016740(transferase activity);GO:0035580(specific granule lumen);GO:0043312(neutrophil…	NA	K13089	NA	interleukin enhancer binding factor 2 [Source:HGNC Symbol;Acc:HGNC:6037]	protein_coding	11.6385	12.5389	14.245	4.62162	9.84277	4.84323	8.86771	5.58655	8.68232	7.91103	9.14997	8.57175	4.29865	15.7845	3.17038	6.26763	13.007	16.6672	13.3664	13.1663	9.25999	24.2644	10.0598	20.7309	0.564297	-0.825472	0.000803348	0.0613051	down	no
MSTRG.59832	RPL34	ENST00000394665;ENST00000394667;ENST00000394668;ENST00000502534	GO:0000184(nuclear-transcribed mRNA catabolic process, nonsense-mediated decay);GO:0003723(RNA binding);GO:0003735(structural constituent of ribosome);GO:0005515(protein binding);GO:0005737(cytoplasm);GO:0005783(endoplasmic reticulum);GO:0005829(cytosol);GO:0005840(ribosome);GO:0006412(translation);GO:0006413(translational initiation);GO:0006614(SRP-dependent cotranslational protein targeting to …	03010(Ribosome);03010(Ribosome)	K02915	NA	ribosomal protein L34 [Source:HGNC Symbol;Acc:HGNC:10340]	protein_coding	22.7696	19.3434	22.0789	7.30173	17.2915	6.16475	14.7824	6.69622	13.2878	13.7105	11.9572	11.1525	4.93537	20.2567	7.35697	11.2912	28.0581	19.4686	20.1665	20.445	24.7298	15.9199	20.532	26.967	0.596689	-0.744949	0.00080544	0.0614094	down	no
MSTRG.42998	MCFD2	ENST00000417180;ENST00000409147;ENST00000409800;ENST00000409913;ENST00000319466;ENST00000409973;ENST00000409105;ENST00000434262;ENST00000409207;ENST00000409218;ENST00000444761	GO:0000139(Golgi membrane);GO:0005509(calcium ion binding);GO:0005515(protein binding);GO:0005783(endoplasmic reticulum);GO:0005789(endoplasmic reticulum membrane);GO:0005793(endoplasmic reticulum-Golgi intermediate compartment);GO:0005794(Golgi apparatus);GO:0006888(endoplasmic reticulum to Golgi vesicle-mediated transport);GO:0012507(ER to Golgi transport vesicle membrane);GO:0015031(protein tr…	NA	K20364	NA	multiple coagulation factor deficiency 2, ER cargo receptor complex subunit [Source:HGNC Symbol;Acc:HGNC:18451]	protein_coding	6.2858	4.92308	7.48203	4.20364	7.51232	2.49677	4.61827	3.62328	5.46759	5.03904	6.42389	5.36997	3.12861	5.98133	2.94103	4.95987	12.2991	8.93408	6.93754	7.42912	6.95133	6.94732	5.06138	8.67048	0.636218	-0.652407	0.000806767	0.0614094	down	no
MSTRG.49852	HSPA13	ENST00000285667	GO:0000166(nucleotide binding);GO:0005515(protein binding);GO:0005524(ATP binding);GO:0005737(cytoplasm);GO:0005739(mitochondrion);GO:0005783(endoplasmic reticulum);GO:0006986(response to unfolded protein);GO:0016887(ATPase activity);GO:0031072(heat shock protein binding);GO:0034620(cellular response to unfolded protein);GO:0042026(protein refolding);GO:0043231(intracellular membrane-bounded orga…	NA	K09491	NA	heat shock protein family A (Hsp70) member 13 [Source:HGNC Symbol;Acc:HGNC:11375]	protein_coding	3.93532	3.18796	3.7945	1.22453	2.24772	1.09394	1.45412	1.43411	2.32516	1.38014	1.81944	1.48512	1.13715	1.75617	0.740246	2.03945	2.58797	4.56429	3.1252	3.14789	4.06462	4.9873	3.01671	2.28299	0.559008	-0.83906	0.000807472	0.061411	down	no
MSTRG.42279	HADHB	ENST00000317799;ENST00000448743;ENST00000545822;ENST00000537713;ENST00000412805;ENST00000405867;ENST00000425035	GO:0003723(RNA binding);GO:0003824(catalytic activity);GO:0003857(3-hydroxyacyl-CoA dehydrogenase activity);GO:0003988(acetyl-CoA C-acyltransferase activity);GO:0004300(enoyl-CoA hydratase activity);GO:0005515(protein binding);GO:0005739(mitochondrion);GO:0005740(mitochondrial envelope);GO:0005741(mitochondrial outer membrane);GO:0005743(mitochondrial inner membrane);GO:0005783(endoplasmic reticu…	00062(Fatty acid elongation);00071(Fatty acid degradation);00280(Valine, leucine and isoleucine degradation);00280(Valine, leucine and isoleucine degradation)	K07509	EC:2.3.1.16	hydroxyacyl-CoA dehydrogenase trifunctional multienzyme complex subunit beta [Source:HGNC Symbol;Acc:HGNC:4803]	protein_coding	7.98124	6.52235	6.64843	3.39268	6.2951	3.57725	4.67617	3.62023	5.51474	4.62775	6.07483	5.97111	3.39047	5.40746	3.23615	4.09105	9.30504	7.90332	7.82424	9.71388	6.60222	5.88946	5.12994	8.09921	0.670007	-0.577753	0.000813659	0.0616204	down	no
MSTRG.47195	CCL20	ENST00000358813;ENST00000409189;ENST00000646475	GO:0002548(monocyte chemotaxis);GO:0005125(cytokine activity);GO:0005515(protein binding);GO:0005576(extracellular region);GO:0005615(extracellular space);GO:0006935(chemotaxis);GO:0006954(inflammatory response);GO:0006955(immune response);GO:0007165(signal transduction);GO:0007186(G protein-coupled receptor signaling pathway);GO:0007267(cell-cell signaling);GO:0008009(chemokine activity);GO:0019…	04060(Cytokine-cytokine receptor interaction);04062(Chemokine signaling pathway);04657(IL-17 signaling pathway);04668(TNF signaling pathway);05323(Rheumatoid arthritis);05323(Rheumatoid arthritis)	K14625	NA	C-C motif chemokine ligand 20 [Source:HGNC Symbol;Acc:HGNC:10619]	protein_coding	1.54767	0.348267	0.322424	0	0.578908	0.245661	0.201358	0.0781203	0.798629	0.873646	0.282789	0.192981	0.149293	0.0471576	0.421966	0.239355	10.2419	0.0989597	0.700544	0.170188	0.3722	4.02323	0.292256	0.337213	0.194876	-2.35937	0.000817288	0.0617756	down	no
MSTRG.59320	MRPS18C	ENST00000295491;ENST00000509970;ENST00000507349;ENST00000505719;ENST00000507019	GO:0003735(structural constituent of ribosome);GO:0005739(mitochondrion);GO:0005743(mitochondrial inner membrane);GO:0005763(mitochondrial small ribosomal subunit);GO:0005840(ribosome);GO:0006412(translation);GO:0070125(mitochondrial translational elongation);GO:0070126(mitochondrial translational termination);GO:0070181(small ribosomal subunit rRNA binding);GO:0070181(small ribosomal subunit rRN…	03010(Ribosome);03010(Ribosome)	K02963	NA	mitochondrial ribosomal protein S18C [Source:HGNC Symbol;Acc:HGNC:16633]	protein_coding	1.08476	1.02887	0.604851	0.443462	0.715758	0.249122	0.743577	0.394136	0.662999	0.83111	0.672215	0.776521	0.378318	0.652008	0.393841	0.451384	1.40629	0.711821	0.877859	1.09942	0.792407	1.06717	0.951729	1.1875	0.622849	-0.683047	0.000819636	0.0617756	down	no
MSTRG.7303	LIX1L	ENST00000604000	GO:0003674(molecular_function);GO:0005575(cellular_component);GO:0005737(cytoplasm);GO:0006914(autophagy);GO:0008150(biological_process);GO:0097352(autophagosome maturation)	NA	NA	NA	limb and CNS expressed 1 like [Source:HGNC Symbol;Acc:HGNC:28715]	protein_coding	4.67601	4.54741	6.0731	2.66329	5.19593	2.6311	3.39274	1.43938	3.6391	5.20828	3.39997	4.11996	3.27087	3.11754	1.81641	3.55346	4.58994	6.04057	8.22599	5.42624	7.44363	3.37723	4.68715	8.91708	0.60303	-0.729699	0.000820431	0.0617756	down	no
MSTRG.16112	MYEOV	ENST00000308946;ENST00000535407;ENST00000441339	GO:0005515(protein binding);GO:0005515(protein binding)	NA	NA	NA	myeloma overexpressed [Source:HGNC Symbol;Acc:HGNC:7563]	protein_coding	0.0358268	0.0851676	0.561457	0.0196881	0.106722	0.03135	0.0500535	0.0401583	0.0380873	0.359785	4.88375	0.123931	0.0707616	0.00866029	1.01707	1.67585	0.0811679	0.183204	0.130551	0.031682	0.140714	0.0502925	0.00617874	0.0337455	6.9261	2.79204	0.000821903	0.0617756	up	no
MSTRG.46530	NDUFB3	ENST00000237889;ENST00000454214;ENST00000450023;ENST00000433898	GO:0005739(mitochondrion);GO:0005743(mitochondrial inner membrane);GO:0005747(mitochondrial respiratory chain complex I);GO:0006120(mitochondrial electron transport, NADH to ubiquinone);GO:0008137(NADH dehydrogenase (ubiquinone) activity);GO:0016020(membrane);GO:0016021(integral component of membrane);GO:0022900(electron transport chain);GO:0032981(mitochondrial respiratory chain complex I assemb…	00190(Oxidative phosphorylation);04714(Thermogenesis);04723(Retrograde endocannabinoid signaling);04932(Non-alcoholic fatty liver disease (NAFLD));05010(Alzheimer disease);05012(Parkinson disease);05016(Huntington disease);05016(Huntington disease)	K03959	NA	NADH:ubiquinone oxidoreductase subunit B3 [Source:HGNC Symbol;Acc:HGNC:7698]	protein_coding	6.23594	6.87237	5.24129	1.8697	3.30484	1.57811	3.24645	1.2808	2.6648	2.87111	4.38469	4.05725	1.94097	4.56639	1.93356	1.91059	9.98079	6.47384	5.91781	4.14609	4.95855	6.32692	3.68884	9.92842	0.524675	-0.930505	0.000825598	0.0619837	down	no
MSTRG.40704	ZNF230	ENST00000585632;ENST00000585491;ENST00000429154	GO:0003676(nucleic acid binding);GO:0003677(DNA binding);GO:0005515(protein binding);GO:0005634(nucleus);GO:0006355(regulation of transcription, DNA-templated);GO:0046872(metal ion binding);GO:0046872(metal ion binding)	05168(Herpes simplex virus 1 infection);05168(Herpes simplex virus 1 infection)	K09228	NA	zinc finger protein 230 [Source:HGNC Symbol;Acc:HGNC:13024]	protein_coding	0.497882	0.516098	0.430824	0.324669	0.420475	0.269144	0.324717	0.227594	0.297558	0.411794	0.476566	0.441548	0.250248	0.326635	0.172098	0.258525	0.569455	0.432502	0.453151	0.747024	0.605687	0.468518	0.498362	0.624565	0.641741	-0.639938	0.000826053	0.0619837	down	no
MSTRG.59115	SDAD1;NAAA	ENST00000356260;ENST00000507187;ENST00000507956;ENST00000286733;ENST00000505594	GO:0000055(ribosomal large subunit export from nucleus);GO:0003674(molecular_function);GO:0005634(nucleus);GO:0005654(nucleoplasm);GO:0005730(nucleolus);GO:0015031(protein transport);GO:0030036(actin cytoskeleton organization);GO:0042254(ribosome biogenesis);GO:0042273(ribosomal large subunit biogenesis);GO:0005737(cytoplasm);GO:0005764(lysosome);GO:0006629(lipid metabolic process);GO:0006631(fat…	NA	K14856;K13720	EC:3.5.1.-	SDA1 domain containing 1 [Source:HGNC Symbol;Acc:HGNC:25537];N-acylethanolamine acid amidase [Source:HGNC Symbol;Acc:HGNC:736]	protein_coding	2.77864	1.90964	1.70505	1.4959	1.59338	0.98762	2.10869	1.12427	1.7042	2.33572	1.60714	1.34113	1.27641	1.54748	1.03564	2.25085	2.59395	2.35962	2.3839	2.88219	2.77228	2.34661	1.90132	2.2572	0.687328	-0.54093	0.000827754	0.0620594	down	no
MSTRG.79760	NCS1	ENST00000372398;ENST00000630865	GO:0000287(magnesium ion binding);GO:0005245(voltage-gated calcium channel activity);GO:0005509(calcium ion binding);GO:0005515(protein binding);GO:0005737(cytoplasm);GO:0005794(Golgi apparatus);GO:0005829(cytosol);GO:0005886(plasma membrane);GO:0010975(regulation of neuron projection development);GO:0014069(postsynaptic density);GO:0016020(membrane);GO:0019901(protein kinase binding);GO:0030054(…	NA	K19932	NA	neuronal calcium sensor 1 [Source:HGNC Symbol;Acc:HGNC:3953]	protein_coding	1.73198	1.17587	1.44603	0.843531	1.23677	1.25308	1.85266	1.05614	1.37025	0.773621	0.690709	2.43301	1.53937	2.15524	0.926489	1.38259	3.43554	3.14709	2.00623	2.68061	3.32229	1.46386	2.79313	1.23615	0.544372	-0.877334	0.000838329	0.0625388	down	no
MSTRG.11014	RSU1	ENST00000345264;ENST00000377921;ENST00000602389	GO:0005515(protein binding);GO:0005829(cytosol);GO:0005925(focal adhesion);GO:0007165(signal transduction);GO:0010811(positive regulation of cell-substrate adhesion);GO:0043547(positive regulation of GTPase activity);GO:0070062(extracellular exosome);GO:0070062(extracellular exosome)	NA	NA	NA	Ras suppressor protein 1 [Source:HGNC Symbol;Acc:HGNC:10464]	protein_coding	5.2083	5.18627	5.22974	2.59215	6.10927	2.06543	3.77059	2.06452	3.06559	3.82513	2.52006	3.30358	2.32118	3.42435	1.84534	3.19035	4.07597	5.26291	5.31858	5.56555	6.41842	5.71878	4.35627	5.4665	0.660478	-0.598417	0.000840099	0.0625945	down	no
MSTRG.5072	STIL	ENST00000337817;ENST00000396221;ENST00000447475;ENST00000371877;ENST00000360380	GO:0000578(embryonic axis specification);GO:0001701(in utero embryonic development);GO:0001843(neural tube closure);GO:0001947(heart looping);GO:0005515(protein binding);GO:0005737(cytoplasm);GO:0005813(centrosome);GO:0005814(centriole);GO:0005829(cytosol);GO:0005856(cytoskeleton);GO:0007052(mitotic spindle organization);GO:0007224(smoothened signaling pathway);GO:0007275(multicellular organism d…	NA	NA	NA	STIL centriolar assembly protein [Source:HGNC Symbol;Acc:HGNC:10879]	protein_coding	0.516938	0.504592	0.350774	0.0856767	0.24031	0.109547	0.433059	0.0866756	0.357064	0.188507	0.259101	0.314738	0.133939	0.409273	0.198283	0.243266	1.01307	0.896502	0.534854	0.280294	0.444249	0.835838	0.336515	0.289235	0.478533	-1.06331	0.000844171	0.0628179	down	no
MSTRG.33272	RPA1	ENST00000254719;ENST00000574049;ENST00000571058;ENST00000570451	GO:0000082(G1/S transition of mitotic cell cycle);GO:0000723(telomere maintenance);GO:0000724(double-strand break repair via homologous recombination);GO:0000784(nuclear chromosome, telomeric region);GO:0003676(nucleic acid binding);GO:0003677(DNA binding);GO:0003684(damaged DNA binding);GO:0003697(single-stranded DNA binding);GO:0005515(protein binding);GO:0005634(nucleus);GO:0005654(nucleoplasm…	03030(DNA replication);03420(Nucleotide excision repair);03430(Mismatch repair);03440(Homologous recombination);03460(Fanconi anemia pathway);03460(Fanconi anemia pathway)	K07466	NA	replication protein A1 [Source:HGNC Symbol;Acc:HGNC:10289]	protein_coding	6.21257	4.73217	4.90068	1.85703	3.54485	1.53925	3.64123	1.4693	2.4991	3.30161	1.63799	2.154	1.9173	4.21993	1.87231	3.04356	6.34473	5.76761	6.69113	4.65406	4.77886	5.37178	4.01287	3.39269	0.591788	-0.756848	0.000847033	0.0629787	down	no
MSTRG.19738	DNAJC22	ENST00000549441	GO:0005515(protein binding);GO:0016020(membrane);GO:0016021(integral component of membrane)	NA	K19370	NA	DnaJ heat shock protein family (Hsp40) member C22 [Source:HGNC Symbol;Acc:HGNC:25802]	protein_coding	0.396899	0.033764	0.145766	0.0243461	0.368803	0.084308	0.24438	0.0235767	0.607563	0.0632833	0.775204	0.478257	0.038677	0.290233	0.0467428	0.191575	1.60985	0.407373	1.26029	0.145715	0.410772	4.22343	0.249343	0.0590606	0.227914	-2.13344	0.000851644	0.0631646	down	no
MSTRG.35750	PRR11;SMG8	ENST00000262293;ENST00000543872;ENST00000578777;ENST00000578922;ENST00000300917;ENST00000582004;ENST00000577457	GO:0005634(nucleus);GO:0005737(cytoplasm);GO:0007050(cell cycle arrest);GO:0016020(membrane);GO:0051726(regulation of cell cycle);GO:0000184(nuclear-transcribed mRNA catabolic process, nonsense-mediated decay);GO:0005515(protein binding);GO:0005575(cellular_component);GO:0005829(cytosol);GO:0045859(regulation of protein kinase activity);GO:0051726(regulation of cell cycle)	NA	K18734	NA	proline rich 11 [Source:HGNC Symbol;Acc:HGNC:25619];SMG8 nonsense mediated mRNA decay factor [Source:HGNC Symbol;Acc:HGNC:25551]	protein_coding	1.49991	1.36811	1.1558	0.227911	1.05252	0.565004	0.992532	0.541209	0.866448	1.18639	1.14384	1.31578	0.600499	1.02571	0.504261	0.673038	2.23361	1.56002	1.54175	1.30049	1.34382	1.99764	0.962223	1.79654	0.577845	-0.791246	0.000876901	0.0643465	down	no
ENSG00000105173	CCNE1	ENST00000357943;ENST00000262643;ENST00000444983;ENST00000576532	GO:0000079(regulation of cyclin-dependent protein serine/threonine kinase activity);GO:0000082(G1/S transition of mitotic cell cycle);GO:0000083(regulation of transcription involved in G1/S transition of mitotic cell cycle);GO:0000122(negative regulation of transcription by RNA polymerase II);GO:0000307(cyclin-dependent protein kinase holoenzyme complex);GO:0000723(telomere maintenance);GO:000551…	04110(Cell cycle);04114(Oocyte meiosis);04115(p53 signaling pathway);04151(PI3K-Akt signaling pathway);04218(Cellular senescence);04934(Cushing syndrome);05161(Hepatitis B);05162(Measles);05165(Human papillomavirus infection);05166(Human T-cell leukemia virus 1 infection);05169(Epstein-Barr virus infection);05200(Pathways in cancer);05203(Viral carcinogenesis);05206(MicroRNAs in cancer);05215(Pro…	NA	NA	cyclin E1 [Source:HGNC Symbol;Acc:HGNC:1589]	protein_coding	0.428509	0.304985	0.20551	0.121448	0.177107	0.159167	0.341132	0.200223	0.183571	0.0881836	0.259636	0.377186	0.165171	0.297492	0.161494	0.0499068	0.991304	0.82093	0.324335	0.270797	0.460681	0.595516	0.406515	0.174706	0.435217	-1.20019	0.000880483	0.0645038	down	no
MSTRG.51122	MED15	ENST00000451058;ENST00000445189;ENST00000457322;ENST00000438962;ENST00000414658;ENST00000445987;ENST00000424287;ENST00000432052;ENST00000263205;ENST00000428629;ENST00000423862;ENST00000382974;ENST00000406969;ENST00000292733	GO:0003712(transcription coregulator activity);GO:0005515(protein binding);GO:0005634(nucleus);GO:0005654(nucleoplasm);GO:0005737(cytoplasm);GO:0006355(regulation of transcription, DNA-templated);GO:0006357(regulation of transcription by RNA polymerase II);GO:0006367(transcription initiation from RNA polymerase II promoter);GO:0016020(membrane);GO:0016592(mediator complex);GO:0019827(stem cell po…	NA	K15157	NA	mediator complex subunit 15 [Source:HGNC Symbol;Acc:HGNC:14248]	protein_coding	2.61231	2.22046	3.1343	2.58409	2.76062	3.54044	4.16448	2.63812	3.57289	3.05051	4.74742	3.15976	3.13521	3.76644	3.54697	3.50213	2.35885	3.21633	2.74961	3.09394	2.57153	2.33731	1.98946	1.99939	1.2831	0.359638	0.000884065	0.0645791	up	no
MSTRG.46031	FKBP7	ENST00000424785;ENST00000434643	GO:0000413(protein peptidyl-prolyl isomerization);GO:0003755(peptidyl-prolyl cis-trans isomerase activity);GO:0005509(calcium ion binding);GO:0005515(protein binding);GO:0005783(endoplasmic reticulum);GO:0005788(endoplasmic reticulum lumen);GO:0016853(isomerase activity);GO:0046872(metal ion binding);GO:0046872(metal ion binding)	NA	K09573	EC:5.2.1.8	FKBP prolyl isomerase 7 [Source:HGNC Symbol;Acc:HGNC:3723]	protein_coding	0.642179	0.955511	0.879967	0.384144	1.17031	0.221536	0.499115	0.290345	0.53066	0.384582	0.456346	0.44865	0.169395	0.544794	0.231615	0.305638	1.26857	1.22766	1.07445	1.1072	0.862211	0.93849	0.457509	0.791288	0.525068	-0.929424	0.000885109	0.0645791	down	no
MSTRG.34849	PSMB3	ENST00000619426	GO:0000165(MAPK cascade);GO:0000209(protein polyubiquitination);GO:0000502(proteasome complex);GO:0002223(stimulatory C-type lectin receptor signaling pathway);GO:0002479(antigen processing and presentation of exogenous peptide antigen via MHC class I, TAP-dependent);GO:0004175(endopeptidase activity);GO:0004298(threonine-type endopeptidase activity);GO:0005515(protein binding);GO:0005634(nucleus…	03050(Proteasome)	NA	NA	proteasome 20S subunit beta 3 [Source:HGNC Symbol;Acc:HGNC:9540]	protein_coding	26.4414	24.9807	23.1266	13.7142	16.656	11.6894	20.4167	9.5057	22.7615	18.8765	21.4699	35.4572	9.54003	19.8695	12.1209	14.4065	43.2921	29.2905	38.2494	26.6428	22.0765	33.7123	22.4665	32.7367	0.605781	-0.723133	0.00088671	0.0646434	down	no
MSTRG.75411	C8orf34	ENST00000337103;ENST00000348340;ENST00000325233;ENST00000523686;ENST00000518698	NA	NA	NA	NA	chromosome 8 open reading frame 34 [Source:HGNC Symbol;Acc:HGNC:30905]	protein_coding	0.612457	0.472415	0.553291	0.142572	1.11938	1.00692	0.329835	0.330561	0.329003	2.57848	0.995509	0.235718	0.757722	0.224598	0.894348	1.42275	0.230831	0.158107	0.769054	0.614138	0.105553	0.295771	0.203604	0.144055	2.381	1.25157	0.000897724	0.0651745	up	no
MSTRG.49093	CTSA	ENST00000372459;ENST00000191018;ENST00000607482;ENST00000372484;ENST00000419493;ENST00000354880;ENST00000646241	GO:0004180(carboxypeptidase activity);GO:0004185(serine-type carboxypeptidase activity);GO:0005576(extracellular region);GO:0005764(lysosome);GO:0005765(lysosomal membrane);GO:0005783(endoplasmic reticulum);GO:0006508(proteolysis);GO:0006687(glycosphingolipid metabolic process);GO:0006886(intracellular protein transport);GO:0008047(enzyme activator activity);GO:0008233(peptidase activity);GO:0016…	04142(Lysosome);04614(Renin-angiotensin system);04614(Renin-angiotensin system)	NA	NA	cathepsin A [Source:HGNC Symbol;Acc:HGNC:9251]	protein_coding	11.5875	16.3942	10.0981	6.08713	8.15425	5.02627	12.5781	5.91118	9.63754	7.28557	5.46513	5.56328	5.57654	7.03288	6.58511	10.263	20.9645	22.9894	13.6156	11.9253	10.5919	10.7892	9.25791	13.2821	0.587421	-0.767533	0.000900891	0.0652465	down	no
MSTRG.49457	SYCP2	ENST00000357552;ENST00000446834;ENST00000425931;ENST00000371001;ENST00000412613	GO:0000780(condensed nuclear chromosome, centromeric region);GO:0000795(synaptonemal complex);GO:0000800(lateral element);GO:0003677(DNA binding);GO:0005634(nucleus);GO:0005694(chromosome);GO:0007049(cell cycle);GO:0007130(synaptonemal complex assembly);GO:0007140(male meiotic nuclear division);GO:0007143(female meiotic nuclear division);GO:0009566(fertilization);GO:0009887(animal organ morphogen…	NA	K19529	NA	synaptonemal complex protein 2 [Source:HGNC Symbol;Acc:HGNC:11490]	protein_coding	0.43432	0.221973	0.209881	0.288775	0.434329	0.175865	0.16272	0.111727	0.202843	0.31553	0.379154	0.785781	0.428083	0.194304	0.592779	0.357965	0.259363	0.174557	0.158095	0.253742	0.269635	0.142903	0.113002	0.0484374	1.86515	0.899289	0.000901504	0.0652465	up	no
MSTRG.64143	KIF20A	ENST00000394894;ENST00000504621	GO:0000166(nucleotide binding);GO:0000281(mitotic cytokinesis);GO:0001578(microtubule bundle formation);GO:0003774(motor activity);GO:0003777(microtubule motor activity);GO:0005515(protein binding);GO:0005524(ATP binding);GO:0005634(nucleus);GO:0005654(nucleoplasm);GO:0005737(cytoplasm);GO:0005794(Golgi apparatus);GO:0005819(spindle);GO:0005856(cytoskeleton);GO:0005871(kinesin complex);GO:0005874…	NA	K10402	NA	kinesin family member 20A [Source:HGNC Symbol;Acc:HGNC:9787]	protein_coding	0.739472	1.03416	0.28016	0.0542111	0.144784	0.141068	0.490551	0.142316	0.279941	0.410114	0.530644	0.641087	0.294003	0.360467	0.153335	0.291545	2.00475	0.879484	0.568809	0.58466	0.386902	2.5561	0.343862	0.581828	0.378672	-1.40098	0.000902294	0.0652495	down	no
MSTRG.8714	RNASEL	ENST00000367559;ENST00000539397	GO:0000166(nucleotide binding);GO:0003723(RNA binding);GO:0004518(nuclease activity);GO:0004519(endonuclease activity);GO:0004521(endoribonuclease activity);GO:0004540(ribonuclease activity);GO:0004672(protein kinase activity);GO:0005515(protein binding);GO:0005524(ATP binding);GO:0005575(cellular_component);GO:0005737(cytoplasm);GO:0005739(mitochondrion);GO:0005759(mitochondrial matrix);GO:00058…	04621(NOD-like receptor signaling pathway);05160(Hepatitis C);05164(Influenza A);05168(Herpes simplex virus 1 infection);05168(Herpes simplex virus 1 infection)	NA	NA	ribonuclease L [Source:HGNC Symbol;Acc:HGNC:10050]	protein_coding	2.25906	1.83191	1.85828	0.594698	1.41747	0.757762	1.53939	0.988206	1.23054	1.7489	1.88555	1.56387	0.94919	1.20272	0.704629	1.00897	1.48278	1.88908	2.76087	1.78862	2.44704	2.84885	1.53026	2.95882	0.608289	-0.71717	0.000903172	0.0652604	down	no
MSTRG.8318	C1orf112	ENST00000359326;ENST00000496973;ENST00000286031;ENST00000472795;ENST00000413811	GO:0005515(protein binding);GO:0005515(protein binding)	NA	NA	NA	chromosome 1 open reading frame 112 [Source:HGNC Symbol;Acc:HGNC:25565]	protein_coding	0.816337	1.08192	1.07432	0.32502	0.637365	0.498861	0.731611	0.44712	0.59793	0.92005	0.535036	0.770412	0.519551	0.756819	0.536204	0.704312	1.02935	1.1837	0.761382	1.02901	1.09627	1.89579	0.654569	1.2141	0.617817	-0.694749	0.000904952	0.0652839	down	no
MSTRG.65621	PAK1IP1	ENST00000379568	GO:0005515(protein binding);GO:0005634(nucleus);GO:0005730(nucleolus);GO:0008283(cell population proliferation);GO:0009968(negative regulation of signal transduction);GO:0042254(ribosome biogenesis);GO:0042273(ribosomal large subunit biogenesis);GO:0060021(roof of mouth development);GO:1901796(regulation of signal transduction by p53 class mediator)	NA	K14830	NA	PAK1 interacting protein 1 [Source:HGNC Symbol;Acc:HGNC:20882]	protein_coding	2.21229	1.92392	1.11012	0.899008	1.70553	0.969908	1.39419	1.05724	0.733966	1.34986	1.51673	1.8958	0.592406	1.42767	0.512498	0.879135	2.13043	2.27124	1.99268	2.16835	1.80447	3.32329	1.63412	2.16178	0.577029	-0.793284	0.000910435	0.0656266	down	no
MSTRG.66092	H4C4	ENST00000614247	GO:0000183(chromatin silencing at rDNA);GO:0000228(nuclear chromosome);GO:0000784(nuclear chromosome, telomeric region);GO:0000786(nucleosome);GO:0000788(nuclear nucleosome);GO:0003677(DNA binding);GO:0003723(RNA binding);GO:0005515(protein binding);GO:0005576(extracellular region);GO:0005634(nucleus);GO:0005654(nucleoplasm);GO:0005694(chromosome);GO:0006303(double-strand break repair via nonhomo…	05034(Alcoholism);05203(Viral carcinogenesis);05322(Systemic lupus erythematosus)	K11254	NA	H4 clustered histone 4 [Source:HGNC Symbol;Acc:HGNC:4782]	protein_coding	13.3475	10.0509	9.60819	3.97729	4.12545	4.70406	12.7709	2.32293	14.4395	13.5101	8.5817	7.94052	7.4175	10.5948	10.769	8.89568	29.9801	22.9558	11.7242	15.5418	23.0101	12.976	14.4138	8.88471	0.512795	-0.963546	0.000914864	0.0657913	down	no
MSTRG.70114	TMEM106B	ENST00000396668;ENST00000396667;ENST00000444443;ENST00000442107	GO:0003674(molecular_function);GO:0005515(protein binding);GO:0005764(lysosome);GO:0005765(lysosomal membrane);GO:0005768(endosome);GO:0007040(lysosome organization);GO:0007041(lysosomal transport);GO:0016020(membrane);GO:0016021(integral component of membrane);GO:0031902(late endosome membrane);GO:0032418(lysosome localization);GO:0048813(dendrite morphogenesis);GO:1900006(positive regulation of…	NA	NA	NA	transmembrane protein 106B [Source:HGNC Symbol;Acc:HGNC:22407]	protein_coding	0.746273	0.803408	0.797589	0.280509	0.854897	0.146566	1.09898	0.856504	0.438163	1.1763	1.16019	0.993747	0.278757	0.939356	0.265969	0.412295	1.2945	2.69701	1.30621	1.23724	0.743341	1.2875	1.21852	1.88455	0.48203	-1.0528	0.000916914	0.065882	down	no
MSTRG.69554	SLC22A1	ENST00000366963;ENST00000540443	GO:0005277(acetylcholine transmembrane transporter activity);GO:0005326(neurotransmitter transmembrane transporter activity);GO:0005330(dopamine:sodium symporter activity);GO:0005334(norepinephrine:sodium symporter activity);GO:0005515(protein binding);GO:0005886(plasma membrane);GO:0005887(integral component of plasma membrane);GO:0006811(ion transport);GO:0006812(cation transport);GO:0006836(ne…	04976(Bile secretion);05231(Choline metabolism in cancer);05231(Choline metabolism in cancer)	K08198	NA	solute carrier family 22 member 1 [Source:HGNC Symbol;Acc:HGNC:10963]	protein_coding	0.835747	0.524024	0.322782	0.296081	0.320121	0.358396	0.618605	0.662205	0.266088	0.381086	0.0211252	0.0517923	0.507076	0.248675	0.189558	0.307073	0.0758778	0.180626	0.178944	0.420385	0.117038	0.0195698	0.12752	0.0904265	2.44155	1.2878	0.000920347	0.0659794	up	no
MSTRG.2488	HPRT1	ENST00000298556	GO:0000166(nucleotide binding);GO:0000287(magnesium ion binding);GO:0001913(T cell mediated cytotoxicity);GO:0001975(response to amphetamine);GO:0004422(hypoxanthine phosphoribosyltransferase activity);GO:0005515(protein binding);GO:0005737(cytoplasm);GO:0005829(cytosol);GO:0006164(purine nucleotide biosynthetic process);GO:0006166(purine ribonucleoside salvage);GO:0006168(adenine salvage);GO:000…	00230(Purine metabolism);00983(Drug metabolism - other enzymes)	K00760	EC:2.4.2.8	hypoxanthine phosphoribosyltransferase 1 [Source:HGNC Symbol;Acc:HGNC:5157]	protein_coding	3.91605	3.81537	3.81566	1.18309	2.69977	1.17825	2.75332	1.0083	1.66257	1.84662	2.52712	2.43643	1.26463	4.80179	1.88018	1.18801	5.53072	6.19621	4.28272	3.73138	3.15387	4.77715	2.2909	5.41549	0.536728	-0.897738	0.000920475	0.0659794	down	no
MSTRG.45880	OLA1	ENST00000284719;ENST00000344357;ENST00000409546;ENST00000427472;ENST00000429575	GO:0000166(nucleotide binding);GO:0002576(platelet degranulation);GO:0005515(protein binding);GO:0005524(ATP binding);GO:0005525(GTP binding);GO:0005576(extracellular region);GO:0005634(nucleus);GO:0005730(nucleolus);GO:0005737(cytoplasm);GO:0005813(centrosome);GO:0005829(cytosol);GO:0016020(membrane);GO:0016787(hydrolase activity);GO:0016887(ATPase activity);GO:0031093(platelet alpha granule lum…	NA	K19788	NA	Obg like ATPase 1 [Source:HGNC Symbol;Acc:HGNC:28833]	protein_coding	2.30925	2.09347	1.78269	0.882881	1.81497	0.782435	1.28971	0.661603	1.09797	1.1192	1.93759	1.66686	0.682872	1.68633	0.846909	1.02327	4.27022	2.02586	2.22515	1.7471	1.63723	2.41044	1.10727	5.09258	0.528324	-0.920506	0.000923958	0.0660955	down	no
MSTRG.5768	SERBP1	ENST00000370990;ENST00000370995;ENST00000361219;ENST00000370994	GO:0003723(RNA binding);GO:0003730(mRNA 3'-UTR binding);GO:0005515(protein binding);GO:0005634(nucleus);GO:0005737(cytoplasm);GO:0005829(cytosol);GO:0005886(plasma membrane);GO:0016020(membrane);GO:0030578(PML body organization);GO:0032183(SUMO binding);GO:0042981(regulation of apoptotic process);GO:0043488(regulation of mRNA stability);GO:0045296(cadherin binding);GO:0048471(perinuclear region o…	NA	K13199	NA	SERPINE1 mRNA binding protein 1 [Source:HGNC Symbol;Acc:HGNC:17860]	protein_coding	4.45457	4.11394	4.08479	2.08913	3.93946	1.02148	4.37404	2.03726	4.03054	2.73385	2.66769	2.6629	1.7507	3.37527	1.71681	2.87466	4.73386	4.94568	4.57461	4.03037	4.19999	7.60364	4.02318	4.01336	0.628557	-0.669885	0.000924305	0.0660955	down	no
MSTRG.63697	LOX	ENST00000231004;ENST00000639739	GO:0001568(blood vessel development);GO:0001649(osteoblast differentiation);GO:0001932(regulation of protein phosphorylation);GO:0004720(protein-lysine 6-oxidase activity);GO:0005507(copper ion binding);GO:0005515(protein binding);GO:0005518(collagen binding);GO:0005576(extracellular region);GO:0005581(collagen trimer);GO:0005615(extracellular space);GO:0005634(nucleus);GO:0006464(cellular protei…	NA	NA	NA	lysyl oxidase [Source:HGNC Symbol;Acc:HGNC:6664]	protein_coding	1.51159	1.37489	2.17456	2.26813	4.36146	0.50866	1.75603	0.617421	1.06067	0.909269	0.75408	1.87459	0.621157	2.79153	0.788932	1.90595	3.53898	6.65744	4.7533	3.4868	4.66052	2.17885	2.78544	0.920734	0.436113	-1.19723	0.000931233	0.0665379	down	no
MSTRG.45770	SP5	ENST00000375281	GO:0000122(negative regulation of transcription by RNA polymerase II);GO:0000790(nuclear chromatin);GO:0000976(transcription regulatory region sequence-specific DNA binding);GO:0000977(RNA polymerase II regulatory region sequence-specific DNA binding);GO:0000981(DNA-binding transcription factor activity, RNA polymerase II-specific);GO:0001227(DNA-binding transcription repressor activity, RNA poly…	NA	K09195	NA	Sp5 transcription factor [Source:HGNC Symbol;Acc:HGNC:14529]	protein_coding	2.60861	2.99427	0.85341	0.795658	0.780732	1.56706	1.50575	2.14047	2.32115	0.813054	0.90794	0.279827	1.35881	7.49179	1.69122	0.76139	1.0934	0.420814	1.45228	1.14006	0.729587	0.479835	0.683668	0.353932	2.27204	1.18399	0.000932453	0.0665636	up	no
MSTRG.65223	NHP2	ENST00000274606;ENST00000502263;ENST00000511078;ENST00000314397	GO:0000469(cleavage involved in rRNA processing);GO:0000470(maturation of LSU-rRNA);GO:0000784(nuclear chromosome, telomeric region);GO:0003723(RNA binding);GO:0005515(protein binding);GO:0005634(nucleus);GO:0005654(nucleoplasm);GO:0005697(telomerase holoenzyme complex);GO:0005730(nucleolus);GO:0005732(small nucleolar ribonucleoprotein complex);GO:0006364(rRNA processing);GO:0007004(telomere main…	03008(Ribosome biogenesis in eukaryotes);03008(Ribosome biogenesis in eukaryotes)	K11129	NA	NHP2 ribonucleoprotein [Source:HGNC Symbol;Acc:HGNC:14377]	protein_coding	1.30909	1.53794	1.48313	0.910188	1.5763	1.40457	2.4728	1.5726	1.45058	1.89861	1.28753	1.64915	0.709527	1.95904	1.05326	1.06894	3.08728	3.62835	1.9233	1.6839	1.63784	1.9597	2.03816	5.34985	0.547748	-0.868416	0.000933172	0.0665636	down	no
MSTRG.64616	MYOZ3	ENST00000297130;ENST00000517768;ENST00000615557;ENST00000520112;ENST00000523553	GO:0003779(actin binding);GO:0005515(protein binding);GO:0005737(cytoplasm);GO:0015629(actin cytoskeleton);GO:0030018(Z disc);GO:0031433(telethonin binding);GO:0051373(FATZ binding);GO:0051373(FATZ binding)	NA	NA	NA	myozenin 3 [Source:HGNC Symbol;Acc:HGNC:18565]	protein_coding	0.116042	0.126773	0.317703	0.158242	0.343463	0.126572	0.154295	0.176491	0.164536	0.239206	0.0613595	0.108911	0.197323	0.0710238	0.0975143	0.355633	0.116253	0.0684612	0.0679129	0.111639	0.178462	0.0541849	0.0875386	0.0970967	1.80097	0.848774	0.000955747	0.0674305	up	no
MSTRG.9766	DEGS1	ENST00000323699;ENST00000415210	GO:0005515(protein binding);GO:0005739(mitochondrion);GO:0005783(endoplasmic reticulum);GO:0005789(endoplasmic reticulum membrane);GO:0005886(plasma membrane);GO:0005887(integral component of plasma membrane);GO:0006629(lipid metabolic process);GO:0006631(fatty acid metabolic process);GO:0006633(fatty acid biosynthetic process);GO:0006636(unsaturated fatty acid biosynthetic process);GO:0009055(el…	00600(Sphingolipid metabolism);04071(Sphingolipid signaling pathway);04071(Sphingolipid signaling pathway)	K04712	1.14.18.5;EC:1.14.19.17	delta 4-desaturase, sphingolipid 1 [Source:HGNC Symbol;Acc:HGNC:13709]	protein_coding	11.7845	13.839	7.09461	3.96766	8.87054	3.35046	6.76652	3.19555	4.18684	6.15212	6.26955	6.07866	4.49486	7.4579	2.85839	5.44928	14.0158	11.6535	9.2631	10.2302	9.22952	17.5927	5.17026	13.2507	0.563107	-0.828518	0.000967457	0.0680427	down	no
ENSG00000197444	OGDHL	ENST00000374103;ENST00000419399	GO:0004591(oxoglutarate dehydrogenase (succinyl-transferring) activity);GO:0005515(protein binding);GO:0005739(mitochondrion);GO:0005759(mitochondrial matrix);GO:0006096(glycolytic process);GO:0006099(tricarboxylic acid cycle);GO:0016491(oxidoreductase activity);GO:0016624(oxidoreductase activity, acting on the aldehyde or oxo group of donors, disulfide as acceptor);GO:0030976(thiamine pyrophosph…	00020(Citrate cycle (TCA cycle));00020(Citrate cycle (TCA cycle))	K00164	EC:1.2.4.2	oxoglutarate dehydrogenase like [Source:HGNC Symbol;Acc:HGNC:25590]	protein_coding	0.0805948	0.0333031	0.0220069	0.0267012	0	0	0.0323586	0	0	0	0.00830776	0	0.0294024	0.00744048	0.0331022	0	0.258121	0.64218	0	0.00750132	0.0154486	0.487675	0.026819	0.0715942	0.0905089	-3.4658	0.00098585	0.0690435	down	no
MSTRG.9392	KCNH1;AL590132	ENST00000271751;ENST00000367007;ENST00000639952;ENST00000638498;ENST00000639602	GO:0005216(ion channel activity);GO:0005244(voltage-gated ion channel activity);GO:0005249(voltage-gated potassium channel activity);GO:0005251(delayed rectifier potassium channel activity);GO:0005267(potassium channel activity);GO:0005515(protein binding);GO:0005516(calmodulin binding);GO:0005634(nucleus);GO:0005637(nuclear inner membrane);GO:0005768(endosome);GO:0005886(plasma membrane);GO:0005…	NA	NA	NA	potassium voltage-gated channel subfamily H member 1 [Source:HGNC Symbol;Acc:HGNC:6250];novel protein	protein_coding	0.0384967	0.151965	0.0864257	0.0324388	0.0545963	0.14792	0.0280535	0.0969936	0.179569	0.250161	0.0242665	0.210901	0.073705	0.257946	0.147461	0.0274268	0.0568112	0.0192784	0.041194	0.0603522	0.0534062	0.0785161	0.0360827	0.0498753	2.28603	1.19285	0.000990196	0.0691004	up	no
MSTRG.40630	LYPD3	ENST00000244333	GO:0005576(extracellular region);GO:0005615(extracellular space);GO:0005886(plasma membrane);GO:0007160(cell-matrix adhesion);GO:0016020(membrane);GO:0016021(integral component of membrane);GO:0031225(anchored component of membrane);GO:0043236(laminin binding);GO:0046658(anchored component of plasma membrane)	NA	NA	NA	LY6/PLAUR domain containing 3 [Source:HGNC Symbol;Acc:HGNC:24880]	protein_coding	0.337307	0.220453	0.326123	0.289106	0.348743	0.153509	0.352508	0.262546	0.322563	0.423104	0.264801	1.692	0.115442	0.250413	0.153976	0.266631	2.23853	1.25036	1.07629	0.604924	1.36044	0.119774	0.872846	0.447803	0.362518	-1.46388	0.000995901	0.0693563	down	no
MSTRG.46954	TMEM169	ENST00000295658;ENST00000437356;ENST00000454545;ENST00000455479;ENST00000406027	GO:0016020(membrane);GO:0016021(integral component of membrane);GO:0016021(integral component of membrane)	NA	NA	NA	transmembrane protein 169 [Source:HGNC Symbol;Acc:HGNC:25130]	protein_coding	0.306026	0.156336	0.0405406	0.0795619	0.0767523	0.0126679	0.0780293	0	0.076758	0.0597117	0.0456447	0.0441179	0.0540674	0.0577538	0.024467	0.114162	0.219755	0.136586	0.247282	0.174989	0.197743	0.596283	0.111657	0.147003	0.334898	-1.57821	0.00100992	0.0697111	down	no
MSTRG.73576	AGAP3	ENST00000469901;ENST00000473312;ENST00000335367;ENST00000468796;ENST00000479901;ENST00000397238;ENST00000461065	GO:0000166(nucleotide binding);GO:0003924(GTPase activity);GO:0005096(GTPase activator activity);GO:0005515(protein binding);GO:0005525(GTP binding);GO:0005634(nucleus);GO:0005737(cytoplasm);GO:0007165(signal transduction);GO:0016020(membrane);GO:0031593(polyubiquitin modification-dependent protein binding);GO:0034614(cellular response to reactive oxygen species);GO:0043161(proteasome-mediated ub…	04144(Endocytosis);04144(Endocytosis)	K12491	NA	ArfGAP with GTPase domain, ankyrin repeat and PH domain 3 [Source:HGNC Symbol;Acc:HGNC:16923]	protein_coding	3.21737	4.06272	3.64917	3.9502	3.32076	3.99685	3.20909	8.2794	6.16496	2.74474	5.25931	5.52755	5.08298	8.11997	4.61794	4.38119	3.06627	3.35507	3.20901	3.7518	3.01039	2.59335	4.48961	2.55484	1.45185	0.537891	0.00101066	0.0697111	up	no
MSTRG.7696	S100A2	ENST00000368707;ENST00000368708;ENST00000487430;ENST00000368709;ENST00000497140;ENST00000368710	GO:0005509(calcium ion binding);GO:0005515(protein binding);GO:0005575(cellular_component);GO:0042802(identical protein binding);GO:0043542(endothelial cell migration);GO:0046872(metal ion binding);GO:0046914(transition metal ion binding);GO:0046914(transition metal ion binding)	NA	NA	NA	S100 calcium binding protein A2 [Source:HGNC Symbol;Acc:HGNC:10492]	protein_coding	0.162033	0.401447	0.508016	0.266918	0.396963	0.380802	1.24392	0.123756	0.240669	0.44409	0.505883	1.47565	0.293998	0.670734	0.42771	0.198194	1.65741	1.3297	2.70889	0.445179	0.631963	3.39423	0.3342	0.552474	0.350134	-1.51402	0.00101084	0.0697111	down	no
MSTRG.8389	PRRC2C	ENST00000495585;ENST00000338920;ENST00000367742;ENST00000426496;ENST00000647382;ENST00000498596;ENST00000644916	GO:0002244(hematopoietic progenitor cell differentiation);GO:0003723(RNA binding);GO:0005737(cytoplasm);GO:0005829(cytosol);GO:0008022(protein C-terminus binding);GO:0010494(cytoplasmic stress granule);GO:0016020(membrane);GO:0030154(cell differentiation);GO:0034063(stress granule assembly);GO:0034063(stress granule assembly)	NA	NA	NA	proline rich coiled-coil 2C [Source:HGNC Symbol;Acc:HGNC:24903]	protein_coding	3.79259	4.05623	3.77774	1.87207	3.11786	2.51061	3.58159	1.74239	4.16241	3.83346	4.87793	3.97828	2.33198	3.69067	1.82888	2.16238	4.34323	4.84057	4.21714	4.28722	4.45311	7.74754	3.77321	8.26099	0.612039	-0.708304	0.00101729	0.0699171	down	no
MSTRG.34933	TOP2A	ENST00000423485;ENST00000581055	GO:0000166(nucleotide binding);GO:0000228(nuclear chromosome);GO:0000287(magnesium ion binding);GO:0000712(resolution of meiotic recombination intermediates);GO:0000775(chromosome, centromeric region);GO:0000793(condensed chromosome);GO:0000819(sister chromatid segregation);GO:0002244(hematopoietic progenitor cell differentiation);GO:0003677(DNA binding);GO:0003682(chromatin binding);GO:0003723(R…	01524(Platinum drug resistance);01524(Platinum drug resistance)	K03164	EC:5.6.2.2	DNA topoisomerase II alpha [Source:HGNC Symbol;Acc:HGNC:11989]	protein_coding	2.00637	1.98438	0.933925	0.214965	0.41604	0.423186	0.871028	0.300908	0.61057	0.598067	2.07191	1.98303	0.358299	0.851209	0.850546	0.765334	5.31592	3.59031	1.28851	0.699758	0.989132	5.71778	1.00754	1.92804	0.371032	-1.43038	0.00101815	0.0699171	down	no
MSTRG.34341	NUFIP2	ENST00000225388;ENST00000579665	GO:0003723(RNA binding);GO:0005515(protein binding);GO:0005634(nucleus);GO:0005654(nucleoplasm);GO:0005737(cytoplasm);GO:0005829(cytosol);GO:0010494(cytoplasmic stress granule);GO:0016020(membrane);GO:0016604(nuclear body);GO:0042788(polysomal ribosome);GO:0042788(polysomal ribosome)	NA	NA	NA	nuclear FMR1 interacting protein 2 [Source:HGNC Symbol;Acc:HGNC:17634]	protein_coding	6.78243	5.842	5.0665	2.5821	5.21745	3.20396	4.34217	1.97526	4.77928	4.29511	4.21177	3.48355	2.54656	4.75319	2.63946	3.14923	6.47214	5.0288	6.18831	5.72824	5.35066	7.25301	4.76294	8.49982	0.658126	-0.603565	0.0010196	0.0699559	down	no
MSTRG.6849	TMIGD3;ADORA3	ENST00000369716;ENST00000241356;ENST00000472933;ENST00000369717;ENST00000632535	GO:0004930(G protein-coupled receptor activity);GO:0005887(integral component of plasma membrane);GO:0006954(inflammatory response);GO:0007165(signal transduction);GO:0007186(G protein-coupled receptor signaling pathway);GO:0007190(activation of adenylate cyclase activity);GO:0008016(regulation of heart contraction);GO:0008285(negative regulation of cell population proliferation);GO:0009611(respo…	04022(cGMP-PKG signaling pathway);04071(Sphingolipid signaling pathway);04080(Neuroactive ligand-receptor interaction);04080(Neuroactive ligand-receptor interaction)	NA	NA	transmembrane and immunoglobulin domain containing 3 [Source:HGNC Symbol;Acc:HGNC:51375];adenosine A3 receptor [Source:HGNC Symbol;Acc:HGNC:268]	protein_coding	1.04975	0.523963	0.252703	0.27421	0.176027	0.253693	0.260242	0.0695078	0.340428	0.221354	0.137851	0.223102	0.166388	0.548274	0.253654	0.646993	1.40054	1.79424	1.25893	0.842064	0.602781	0.335618	0.327157	0.306667	0.392992	-1.34743	0.0010222	0.0700439	down	no
MSTRG.22815	POSTN	ENST00000379742;ENST00000541179;ENST00000379743;ENST00000379749;ENST00000541481;ENST00000379747	GO:0001666(response to hypoxia);GO:0001953(negative regulation of cell-matrix adhesion);GO:0003073(regulation of systemic arterial blood pressure);GO:0005201(extracellular matrix structural constituent);GO:0005515(protein binding);GO:0005576(extracellular region);GO:0005615(extracellular space);GO:0005737(cytoplasm);GO:0005794(Golgi apparatus);GO:0005802(trans-Golgi network);GO:0007155(cell adhes…	NA	NA	NA	periostin [Source:HGNC Symbol;Acc:HGNC:16953]	protein_coding	7.22513	5.29057	7.93482	1.38064	3.94915	1.75679	1.82623	0.847843	1.00413	1.00796	1.19008	2.35985	1.91528	1.76368	1.462	1.64967	4.42389	11.1265	11.0683	3.84289	11.5514	8.41213	1.92238	2.16869	0.390378	-1.35706	0.00102245	0.0700439	down	no
MSTRG.25639	ZFP36L1	ENST00000553375;ENST00000439696;ENST00000555997;ENST00000336440;ENST00000557086	GO:0000165(MAPK cascade);GO:0000288(nuclear-transcribed mRNA catabolic process, deadenylation-dependent decay);GO:0000932(P-body);GO:0000981(DNA-binding transcription factor activity, RNA polymerase II-specific);GO:0001570(vasculogenesis);GO:0003342(proepicardium development);GO:0003677(DNA binding);GO:0003723(RNA binding);GO:0003729(mRNA binding);GO:0005515(protein binding);GO:0005634(nucleus);G…	04218(Cellular senescence);04218(Cellular senescence)	NA	NA	ZFP36 ring finger protein like 1 [Source:HGNC Symbol;Acc:HGNC:1107]	protein_coding	22.7264	23.0369	28.7604	13.1038	9.65307	20.3252	33.9693	24.4856	30.3404	22.7099	30.121	14.02	15.2811	31.0115	23.6421	12.553	32.5847	56.2148	32.7181	31.5007	34.5703	80.5682	38.6267	30.4415	0.527451	-0.922891	0.00102669	0.0701763	down	no
MSTRG.71985	VPS50	ENST00000458707;ENST00000305866;ENST00000251739;ENST00000443443;ENST00000544910	GO:0000149(SNARE binding);GO:0005515(protein binding);GO:0005768(endosome);GO:0005829(cytosol);GO:0015031(protein transport);GO:0016020(membrane);GO:0032456(endocytic recycling);GO:0042147(retrograde transport, endosome to Golgi);GO:0055037(recycling endosome);GO:0070062(extracellular exosome);GO:1990745(EARP complex);GO:1990745(EARP complex)	NA	K23288	NA	VPS50 subunit of EARP/GARPII complex [Source:HGNC Symbol;Acc:HGNC:25956]	protein_coding	1.47752	1.18691	1.15077	0.516278	1.09789	0.555311	1.0995	0.551136	0.866258	1.06842	0.800816	0.642514	0.731859	1.33314	0.772793	0.826973	1.77726	1.69269	1.26414	1.86057	1.35198	1.24747	0.853571	1.16604	0.65447	-0.611602	0.00103338	0.0704165	down	no
MSTRG.2144	PLS3	ENST00000355899;ENST00000473026;ENST00000289290;ENST00000539310;ENST00000626746;ENST00000497870;ENST00000420625	GO:0003779(actin binding);GO:0005509(calcium ion binding);GO:0005515(protein binding);GO:0005737(cytoplasm);GO:0005829(cytosol);GO:0005884(actin filament);GO:0005886(plasma membrane);GO:0032432(actin filament bundle);GO:0046872(metal ion binding);GO:0051015(actin filament binding);GO:0051017(actin filament bundle assembly);GO:0051639(actin filament network formation);GO:0060348(bone development);…	NA	K17336	NA	plastin 3 [Source:HGNC Symbol;Acc:HGNC:9091]	protein_coding	17.4017	20.5014	25.3665	8.25721	20.6025	7.1732	16.0573	6.82239	11.519	9.75481	21.4173	17.7581	8.43919	18.1492	13.2918	11.5119	55.6077	17.236	20.3772	17.7536	15.5886	18.8555	21.413	66.634	0.501195	-0.996557	0.00103689	0.0704938	down	no
MSTRG.5626	ALG6	ENST00000263440	GO:0004583(dolichyl-phosphate-glucose-glycolipid alpha-glucosyltransferase activity);GO:0005783(endoplasmic reticulum);GO:0005789(endoplasmic reticulum membrane);GO:0006486(protein glycosylation);GO:0006487(protein N-linked glycosylation);GO:0006488(dolichol-linked oligosaccharide biosynthetic process);GO:0006490(oligosaccharide-lipid intermediate biosynthetic process);GO:0016020(membrane);GO:001…	00510(N-Glycan biosynthesis)	K03848	EC:2.4.1.267	ALG6 alpha-1,3-glucosyltransferase [Source:HGNC Symbol;Acc:HGNC:23157]	protein_coding	1.5616	1.21171	1.00518	0.396797	1.15923	0.280487	0.939387	0.400952	0.683095	0.827921	0.250818	0.508159	0.505167	0.733457	0.474064	0.704016	1.0897	1.24246	1.61649	1.08416	0.938099	3.32882	1.06131	0.892918	0.517242	-0.951089	0.00104078	0.0705886	down	no
ENSG00000253626	EIF5AL1	ENST00000520547	GO:0003723(RNA binding);GO:0003746(translation elongation factor activity);GO:0005634(nucleus);GO:0005643(nuclear pore);GO:0005737(cytoplasm);GO:0005783(endoplasmic reticulum);GO:0005789(endoplasmic reticulum membrane);GO:0006412(translation);GO:0006414(translational elongation);GO:0015031(protein transport);GO:0016020(membrane);GO:0043022(ribosome binding);GO:0045901(positive regulation of trans…	NA	NA	NA	eukaryotic translation initiation factor 5A like 1 [Source:HGNC Symbol;Acc:HGNC:17419]	protein_coding	0.567471	0.536927	0.64263	0.345421	0.285017	0.193937	0.295164	0.288608	0.324447	0.3278	0.503029	0.373954	0.186671	0.553893	0.307098	0.341814	1.31116	0.523033	0.829451	0.844236	0.543231	0.723798	0.562015	0.287275	0.539978	-0.889028	0.00104298	0.0705886	down	no
MSTRG.5646	PGM1	ENST00000540265;ENST00000371084;ENST00000371083;ENST00000650546	GO:0000287(magnesium ion binding);GO:0004614(phosphoglucomutase activity);GO:0005515(protein binding);GO:0005576(extracellular region);GO:0005737(cytoplasm);GO:0005829(cytosol);GO:0005975(carbohydrate metabolic process);GO:0005978(glycogen biosynthetic process);GO:0005980(glycogen catabolic process);GO:0006006(glucose metabolic process);GO:0006094(gluconeogenesis);GO:0006096(glycolytic process);G…	00010(Glycolysis / Gluconeogenesis);00030(Pentose phosphate pathway);00052(Galactose metabolism);00230(Purine metabolism);00500(Starch and sucrose metabolism);00520(Amino sugar and nucleotide sugar metabolism);00520(Amino sugar and nucleotide sugar metabolism)	K01835	EC:5.4.2.2	phosphoglucomutase 1 [Source:HGNC Symbol;Acc:HGNC:8905]	protein_coding	5.47984	7.11523	4.97108	7.35128	6.285	2.70049	7.71138	3.0826	7.74386	3.89332	5.28742	3.94533	2.82311	5.02114	3.16694	4.66137	8.7578	9.54021	10.9849	6.32037	6.63502	22.9696	6.74268	5.23143	0.526284	-0.926086	0.00105158	0.0710101	down	no
MSTRG.6176	ZNHIT6	ENST00000370574	GO:0000463(maturation of LSU-rRNA from tricistronic rRNA transcript (SSU-rRNA, 5.8S rRNA, LSU-rRNA));GO:0000492(box C/D snoRNP assembly);GO:0001094(TFIID-class transcription factor complex binding);GO:0005515(protein binding);GO:0005634(nucleus);GO:0019899(enzyme binding);GO:0042254(ribosome biogenesis);GO:0042802(identical protein binding);GO:0046872(metal ion binding);GO:0048254(snoRNA localiza…	NA	NA	NA	zinc finger HIT-type containing 6 [Source:HGNC Symbol;Acc:HGNC:26089]	protein_coding	1.6333	1.72284	2.14839	0.700694	1.34045	0.494776	1.59136	0.701121	1.16044	1.20806	1.71	1.7821	0.590143	0.876875	0.820904	1.38187	3.11806	3.20789	1.94807	2.30186	1.38906	2.37607	1.3081	1.7497	0.570824	-0.808882	0.00105529	0.0711873	down	no
MSTRG.43720	PRADC1	ENST00000258083	GO:0005515(protein binding);GO:0005576(extracellular region)	NA	NA	NA	protease associated domain containing 1 [Source:HGNC Symbol;Acc:HGNC:16047]	protein_coding	3.35102	3.2923	2.29736	1.65365	2.26189	1.20247	3.04277	1.93777	2.19235	2.2137	1.37831	1.42819	0.730136	2.56813	1.17626	2.37464	4.06159	4.51265	3.77176	3.23918	2.69258	3.34044	2.86603	2.74365	0.60785	-0.718213	0.00107041	0.0716876	down	no
MSTRG.58287	PGM2	ENST00000381967;ENST00000625312	GO:0000287(magnesium ion binding);GO:0004614(phosphoglucomutase activity);GO:0005515(protein binding);GO:0005576(extracellular region);GO:0005737(cytoplasm);GO:0005829(cytosol);GO:0005975(carbohydrate metabolic process);GO:0005978(glycogen biosynthetic process);GO:0005980(glycogen catabolic process);GO:0006006(glucose metabolic process);GO:0006098(pentose-phosphate shunt);GO:0008973(phosphopentom…	00010(Glycolysis / Gluconeogenesis);00030(Pentose phosphate pathway);00052(Galactose metabolism);00230(Purine metabolism);00500(Starch and sucrose metabolism);00520(Amino sugar and nucleotide sugar metabolism);00520(Amino sugar and nucleotide sugar metabolism)	K15779	5.4.2.7;EC:5.4.2.2	phosphoglucomutase 2 [Source:HGNC Symbol;Acc:HGNC:8906]	protein_coding	2.60837	2.37944	1.91913	1.14531	2.74398	1.26695	1.72024	1.30492	0.950776	2.02682	2.17157	1.97744	1.21787	1.95446	0.803575	1.40168	3.4852	2.82698	2.89694	2.33801	2.45538	3.29131	1.89029	2.76947	0.628429	-0.670179	0.00107325	0.0717776	down	no
MSTRG.9946	H2BU1	ENST00000620438	GO:0000786(nucleosome);GO:0003674(molecular_function);GO:0003677(DNA binding);GO:0005634(nucleus);GO:0005654(nucleoplasm);GO:0005694(chromosome);GO:0005829(cytosol);GO:0006334(nucleosome assembly);GO:0046982(protein heterodimerization activity)	05034(Alcoholism);05203(Viral carcinogenesis);05322(Systemic lupus erythematosus)	K11252	NA	H2B.U histone 1 [Source:HGNC Symbol;Acc:HGNC:20514]	protein_coding	0.605719	0.441589	0.729912	0.141936	0.225448	0.26101	0.605241	0.083551	0.434502	0.53426	0.04629	0.104921	0.200153	0.35801	0.372199	0.574633	0.742511	0.81685	0.534642	0.928084	1.16418	2.74331	0.476206	0.210249	0.375483	-1.41318	0.00107415	0.0717776	down	no
MSTRG.16428	GVQW3	ENST00000663165;ENST00000662483;ENST00000667240;ENST00000529331;ENST00000321844	NA	NA	NA	NA	GVQW motif containing 3 [Source:HGNC Symbol;Acc:HGNC:51239]	protein_coding	0.389829	0.26723	0.290765	0.127131	0.233567	0.175085	0.287425	0.212096	0.2617	0.416031	0.153987	0.222855	0.192205	0.336616	0.267575	0.043322	0.582972	1.39684	0.399154	0.273357	0.352613	0.466251	0.338611	0.289158	0.472977	-1.08016	0.00108254	0.0721772	down	no
MSTRG.35975	DCAF7	ENST00000614556	GO:0005515(protein binding);GO:0005634(nucleus);GO:0005654(nucleoplasm);GO:0005737(cytoplasm);GO:0005829(cytosol);GO:0007275(multicellular organism development);GO:0016363(nuclear matrix);GO:0016567(protein ubiquitination);GO:0016604(nuclear body);GO:0032991(protein-containing complex);GO:0043687(post-translational protein modification);GO:0080008(Cul4-RING E3 ubiquitin ligase complex)	NA	K11805	NA	DDB1 and CUL4 associated factor 7 [Source:HGNC Symbol;Acc:HGNC:30915]	protein_coding	15.904	15.7307	12.4518	7.75105	13.4635	1.63716	13.0659	6.47814	9.71874	15.1187	3.85338	12.4859	7.06973	11.2606	6.65525	9.87815	4.4048	2.91271	17.4642	3.43668	3.06316	3.45867	3.51994	4.16684	1.91532	0.937586	0.00108485	0.0722776	up	no
MSTRG.34767	MRPL45	ENST00000619548;ENST00000613675	GO:0005739(mitochondrion);GO:0005739(mitochondrion)	NA	K17426	NA	mitochondrial ribosomal protein L45 [Source:HGNC Symbol;Acc:HGNC:16651]	protein_coding	3.83157	3.88429	4.48021	1.67392	3.76461	1.63612	3.20879	1.66607	4.32396	3.1099	3.25657	5.73415	1.7562	4.1085	1.77187	2.23284	6.61714	4.6713	5.63104	4.57761	3.83466	6.70547	2.72959	8.81469	0.578681	-0.789159	0.00108829	0.0723453	down	no
MSTRG.9807	DNAH14	ENST00000366850;ENST00000445597;ENST00000366848;ENST00000428003;ENST00000328556;ENST00000433124;ENST00000366849;ENST00000430092;ENST00000450490;ENST00000439375;ENST00000474801;ENST00000400952	GO:0000166(nucleotide binding);GO:0003774(motor activity);GO:0003777(microtubule motor activity);GO:0005524(ATP binding);GO:0005737(cytoplasm);GO:0005856(cytoskeleton);GO:0005874(microtubule);GO:0005929(cilium);GO:0007018(microtubule-based movement);GO:0008569(ATP-dependent microtubule motor activity, minus-end-directed);GO:0030286(dynein complex);GO:0042995(cell projection);GO:0045505(dynein int…	05016(Huntington disease);05016(Huntington disease)	K10408	NA	dynein axonemal heavy chain 14 [Source:HGNC Symbol;Acc:HGNC:2945]	protein_coding	0.206476	0.706554	0.881247	0.222647	0.323748	0.367109	0.571256	0.518996	0.140743	0.492198	0.204875	0.193147	0.289445	0.551979	0.37169	0.206412	0.403044	0.558979	0.762261	0.992567	0.456776	1.75097	0.468463	1.95048	0.425444	-1.23296	0.00109208	0.0725437	down	no
MSTRG.35600	MMD	ENST00000262065;ENST00000649377;ENST00000571578	GO:0004672(protein kinase activity);GO:0005515(protein binding);GO:0005764(lysosome);GO:0005765(lysosomal membrane);GO:0005768(endosome);GO:0005794(Golgi apparatus);GO:0005887(integral component of plasma membrane);GO:0006468(protein phosphorylation);GO:0016020(membrane);GO:0016021(integral component of membrane);GO:0019835(cytolysis);GO:0031902(late endosome membrane);GO:0032880(regulation of pr…	NA	K11064	NA	monocyte to macrophage differentiation associated [Source:HGNC Symbol;Acc:HGNC:7153]	protein_coding	2.13447	2.353	1.8865	1.7249	2.1524	1.41566	1.12932	0.772641	1.43247	1.47544	2.55867	2.30289	1.41134	1.01332	0.782052	1.99159	5.04518	3.8499	3.96215	2.27353	3.20985	3.46971	1.73067	1.41078	0.531759	-0.911155	0.00109325	0.0725509	down	no
MSTRG.66105	H3C7	ENST00000618052	GO:0000183(chromatin silencing at rDNA);GO:0000228(nuclear chromosome);GO:0000786(nucleosome);GO:0000788(nuclear nucleosome);GO:0003677(DNA binding);GO:0005515(protein binding);GO:0005576(extracellular region);GO:0005634(nucleus);GO:0005654(nucleoplasm);GO:0005694(chromosome);GO:0006325(chromatin organization);GO:0006334(nucleosome assembly);GO:0006335(DNA replication-dependent nucleosome assembl…	05034(Alcoholism);05202(Transcriptional misregulation in cancer);05322(Systemic lupus erythematosus)	K11253	NA	H3 clustered histone 7 [Source:HGNC Symbol;Acc:HGNC:4773]	protein_coding	7.81318	13.0659	3.69917	2.14403	3.03577	2.9527	6.13087	4.48846	7.5518	6.76015	1.55028	4.56513	6.65046	4.75928	9.51497	10.6281	28.5923	17.7549	5.70317	8.66148	16.7104	15.0962	9.47438	7.71822	0.434369	-1.20301	0.00109429	0.0725509	down	no
MSTRG.63953	SEPTIN8	ENST00000296873;ENST00000453480;ENST00000378706;ENST00000378721;ENST00000378719;ENST00000378701;ENST00000371493;ENST00000378699;ENST00000448933;ENST00000458488;ENST00000414594	GO:0000166(nucleotide binding);GO:0003924(GTPase activity);GO:0005515(protein binding);GO:0005525(GTP binding);GO:0005737(cytoplasm);GO:0005856(cytoskeleton);GO:0005940(septin ring);GO:0015630(microtubule cytoskeleton);GO:0016020(membrane);GO:0030054(cell junction);GO:0030424(axon);GO:0030672(synaptic vesicle membrane);GO:0031105(septin complex);GO:0031410(cytoplasmic vesicle);GO:0032153(cell div…	05100(Bacterial invasion of epithelial cells);05100(Bacterial invasion of epithelial cells)	K16939	NA	septin 8 [Source:HGNC Symbol;Acc:HGNC:16511]	protein_coding	2.93823	2.42087	2.62159	1.57763	2.99864	1.39013	2.31179	1.49927	2.21671	2.28634	4.09777	3.57427	1.4197	2.8434	1.57381	2.97791	3.33233	4.35842	4.23359	3.74175	4.86108	7.07057	2.73008	2.36018	0.592695	-0.754638	0.00109927	0.0726081	down	no
MSTRG.2121	AMOT	ENST00000371959;ENST00000304758;ENST00000371962;ENST00000371958	GO:0001525(angiogenesis);GO:0001570(vasculogenesis);GO:0001701(in utero embryonic development);GO:0001702(gastrulation with mouth forming second);GO:0001726(ruffle);GO:0003365(establishment of cell polarity involved in ameboidal cell migration);GO:0005515(protein binding);GO:0005654(nucleoplasm);GO:0005829(cytosol);GO:0005884(actin filament);GO:0005886(plasma membrane);GO:0005923(bicellular tight…	04390(Hippo signaling pathway);04530(Tight junction);04530(Tight junction)	K16819	NA	angiomotin [Source:HGNC Symbol;Acc:HGNC:17810]	protein_coding	1.12705	1.6856	2.08122	0.648836	1.86765	1.26642	4.09916	0.967157	1.0495	2.06746	1.85596	3.60144	0.648941	4.33624	1.67543	1.13248	2.03031	2.56355	4.50613	5.28687	3.34559	4.20339	2.81915	7.17673	0.471483	-1.08472	0.00109952	0.0726081	down	no
MSTRG.73284	CLEC5A	ENST00000546910;ENST00000438351;ENST00000439991;ENST00000551012	GO:0001618(virus receptor activity);GO:0002076(osteoblast development);GO:0002376(immune system process);GO:0005829(cytosol);GO:0005886(plasma membrane);GO:0005887(integral component of plasma membrane);GO:0006968(cellular defense response);GO:0007165(signal transduction);GO:0009986(cell surface);GO:0016020(membrane);GO:0016021(integral component of membrane);GO:0016032(viral process);GO:0030099(…	NA	K10073	NA	C-type lectin domain containing 5A [Source:HGNC Symbol;Acc:HGNC:2054]	protein_coding	0.924472	1.71917	0.80385	0.371667	0.755992	0.671676	0.38252	0.554468	0.170885	1.19949	0.19718	0.312933	0.210688	0.69803	0.330133	0.931366	3.01177	2.51325	0.903348	1.16442	0.429189	0.981297	1.8227	1.62881	0.410867	-1.28326	0.00110554	0.072791	down	no
MSTRG.61986	MRPS30	ENST00000507110	GO:0003723(RNA binding);GO:0003735(structural constituent of ribosome);GO:0005739(mitochondrion);GO:0005743(mitochondrial inner membrane);GO:0005762(mitochondrial large ribosomal subunit);GO:0005840(ribosome);GO:0006412(translation);GO:0006915(apoptotic process);GO:0070125(mitochondrial translational elongation);GO:0070126(mitochondrial translational termination)	NA	K17409	NA	mitochondrial ribosomal protein S30 [Source:HGNC Symbol;Acc:HGNC:8769]	protein_coding	2.58929	3.27545	2.85783	1.20179	2.84512	1.07808	2.45656	1.80027	2.5347	2.29002	2.90516	2.66356	1.87001	1.9432	1.6121	1.85228	4.11876	2.51482	2.72706	3.1124	2.74809	4.03061	2.90228	6.62874	0.621473	-0.686236	0.00111178	0.0729244	down	no
MSTRG.71855	ADAM22	ENST00000398201;ENST00000398204;ENST00000439864;ENST00000426930;ENST00000398203;ENST00000413139;ENST00000412441;ENST00000398209	GO:0004222(metalloendopeptidase activity);GO:0005178(integrin binding);GO:0005515(protein binding);GO:0005886(plasma membrane);GO:0006508(proteolysis);GO:0007155(cell adhesion);GO:0007162(negative regulation of cell adhesion);GO:0007417(central nervous system development);GO:0008237(metallopeptidase activity);GO:0008344(adult locomotory behavior);GO:0014037(Schwann cell differentiation);GO:001602…	NA	K16068	EC:3.4.24.-	ADAM metallopeptidase domain 22 [Source:HGNC Symbol;Acc:HGNC:201]	protein_coding	0.416206	0.297056	0.465611	0.165648	0.457695	0.266836	0.480244	0.161849	0.503972	0.381661	0.30271	0.388338	0.152584	0.265586	0.283434	0.285151	0.436359	0.372459	0.468798	0.529631	0.970362	0.654288	0.407797	0.543972	0.601617	-0.733082	0.00111244	0.0729244	down	no
MSTRG.63394	PPIP5K2	ENST00000613907;ENST00000358359;ENST00000515845;ENST00000507310;ENST00000509597;ENST00000627916;ENST00000321521;ENST00000502481;ENST00000511022;ENST00000613674	GO:0000166(nucleotide binding);GO:0000827(inositol-1,3,4,5,6-pentakisphosphate kinase activity);GO:0000828(inositol hexakisphosphate kinase activity);GO:0000829(inositol heptakisphosphate kinase activity);GO:0000832(inositol hexakisphosphate 5-kinase activity);GO:0005524(ATP binding);GO:0005737(cytoplasm);GO:0005829(cytosol);GO:0006020(inositol metabolic process);GO:0007605(sensory perception of …	04070(Phosphatidylinositol signaling system);04070(Phosphatidylinositol signaling system)	K13024	EC:2.7.4.24	diphosphoinositol pentakisphosphate kinase 2 [Source:HGNC Symbol;Acc:HGNC:29035]	protein_coding	1.22065	1.39693	1.18572	0.469732	1.34249	0.563905	1.15667	0.650017	1.03639	1.03319	1.41904	0.911559	0.609126	1.00671	0.616186	0.975278	1.54985	1.34812	1.24369	1.41444	1.37438	1.93333	1.14926	1.74032	0.663366	-0.592124	0.00111578	0.0730904	down	no
MSTRG.58818	POLR2B	ENST00000381227;ENST00000441246;ENST00000433463;ENST00000450656;ENST00000314595;ENST00000431623	GO:0000398(mRNA splicing, via spliceosome);GO:0000784(nuclear chromosome, telomeric region);GO:0003677(DNA binding);GO:0003682(chromatin binding);GO:0003723(RNA binding);GO:0003899(DNA-directed 5'-3' RNA polymerase activity);GO:0005515(protein binding);GO:0005634(nucleus);GO:0005654(nucleoplasm);GO:0005665(RNA polymerase II, core complex);GO:0006283(transcription-coupled nucleotide-excision repai…	03020(RNA polymerase);05016(Huntington disease);05016(Huntington disease)	K03010	EC:2.7.7.6	RNA polymerase II subunit B [Source:HGNC Symbol;Acc:HGNC:9188]	protein_coding	4.5174	3.89415	3.90374	1.49334	3.82761	1.65598	3.07276	1.72635	2.90931	3.10448	4.29071	3.76752	2.09944	3.12637	1.92289	2.30453	6.03689	4.50255	4.37317	4.00242	4.44359	4.68316	3.63462	4.43756	0.659254	-0.601093	0.00111665	0.0730934	down	no
MSTRG.12271	DDX50	ENST00000373585;ENST00000610822	GO:0000166(nucleotide binding);GO:0003676(nucleic acid binding);GO:0003723(RNA binding);GO:0003724(RNA helicase activity);GO:0004386(helicase activity);GO:0005524(ATP binding);GO:0005634(nucleus);GO:0005730(nucleolus);GO:0005886(plasma membrane);GO:0016020(membrane);GO:0016787(hydrolase activity);GO:0016787(hydrolase activity)	NA	K13183	EC:3.6.4.13	DExD-box helicase 50 [Source:HGNC Symbol;Acc:HGNC:17906]	protein_coding	4.05565	3.00337	3.84992	1.47893	3.05712	1.70868	2.35364	1.38678	2.09656	2.91129	3.8994	3.59023	1.47501	2.88095	1.63403	2.4376	4.79713	4.01769	3.53229	3.73508	4.57171	3.69802	3.37182	5.03362	0.638317	-0.647654	0.00112101	0.0732046	down	no
MSTRG.54599	ARL6IP5	ENST00000273258	GO:0002037(negative regulation of L-glutamate import across plasma membrane);GO:0003674(molecular_function);GO:0005515(protein binding);GO:0005737(cytoplasm);GO:0005783(endoplasmic reticulum);GO:0005789(endoplasmic reticulum membrane);GO:0005856(cytoskeleton);GO:0005886(plasma membrane);GO:0008631(intrinsic apoptotic signaling pathway in response to oxidative stress);GO:0010917(negative regulatio…	NA	K20393	NA	ADP ribosylation factor like GTPase 6 interacting protein 5 [Source:HGNC Symbol;Acc:HGNC:16937]	protein_coding	17.0742	14.7535	14.1764	5.61919	13.2316	4.24516	7.5004	4.31577	7.70262	5.14399	13.9117	9.96418	5.53437	8.64384	6.39234	8.41484	23.5779	14.8019	14.902	19.1931	13.6112	16.5356	10.7194	14.4937	0.573491	-0.802157	0.00112219	0.0732046	down	no
MSTRG.46507	TMEM237	ENST00000409444;ENST00000409883;ENST00000621467	GO:0005515(protein binding);GO:0005929(cilium);GO:0016020(membrane);GO:0016021(integral component of membrane);GO:0030030(cell projection organization);GO:0030111(regulation of Wnt signaling pathway);GO:0032391(photoreceptor connecting cilium);GO:0035869(ciliary transition zone);GO:0042995(cell projection);GO:0060271(cilium assembly);GO:0120199(cone photoreceptor outer segment);GO:0120200(rod pho…	NA	K22765	NA	transmembrane protein 237 [Source:HGNC Symbol;Acc:HGNC:14432]	protein_coding	0.874979	0.945195	1.27283	0.49932	0.836345	0.431925	1.03019	0.447404	0.899371	0.620404	0.40765	0.609442	0.605993	0.822178	0.833761	0.669219	1.66945	0.966039	0.906992	1.43349	1.07933	0.892431	0.994097	1.49378	0.62562	-0.676641	0.00112242	0.0732046	down	no
MSTRG.33498	EFNB3	ENST00000226091	GO:0001618(virus receptor activity);GO:0005005(transmembrane-ephrin receptor activity);GO:0005515(protein binding);GO:0005886(plasma membrane);GO:0005887(integral component of plasma membrane);GO:0007267(cell-cell signaling);GO:0007275(multicellular organism development);GO:0007399(nervous system development);GO:0007411(axon guidance);GO:0007628(adult walking behavior);GO:0016020(membrane);GO:001…	04360(Axon guidance)	K05463	NA	ephrin B3 [Source:HGNC Symbol;Acc:HGNC:3228]	protein_coding	0.337065	0.284831	0.589842	0.171008	0.377993	0.372707	0.436514	0.192074	0.158465	0.372533	0.067574	0.40148	0.54196	1.75902	0.448139	0.416765	4.1868	1.23581	0.484306	1.79691	0.585854	1.80643	0.475948	0.136148	0.323489	-1.62821	0.00112408	0.0732423	down	no
MSTRG.63603	ATG12	ENST00000500945;ENST00000509910	GO:0000045(autophagosome assembly);GO:0000422(autophagy of mitochondrion);GO:0005515(protein binding);GO:0005737(cytoplasm);GO:0005776(autophagosome);GO:0005829(cytosol);GO:0006501(C-terminal protein lipidation);GO:0006914(autophagy);GO:0016020(membrane);GO:0016032(viral process);GO:0016236(macroautophagy);GO:0019776(Atg8 ligase activity);GO:0030670(phagocytic vesicle membrane);GO:0032991(protein…	04068(FoxO signaling pathway);04136(Autophagy - other);04140(Autophagy - animal);04621(NOD-like receptor signaling pathway);04622(RIG-I-like receptor signaling pathway);04622(RIG-I-like receptor signaling pathway)	K08336	NA	autophagy related 12 [Source:HGNC Symbol;Acc:HGNC:588]	protein_coding	2.07187	1.62199	1.27289	0.969374	1.40503	0.957725	1.314	0.941987	1.20712	1.80407	1.51187	1.40904	1.15511	1.26584	0.746026	1.57776	2.81288	1.22462	1.52626	1.79442	1.91856	2.31422	1.74294	3.30019	0.638199	-0.647923	0.00112463	0.0732423	down	no
MSTRG.55775	HMCES	ENST00000502878;ENST00000509551;ENST00000509042;ENST00000383463;ENST00000511665;ENST00000417226;ENST00000510314;ENST00000389735	GO:0003677(DNA binding);GO:0003697(single-stranded DNA binding);GO:0005515(protein binding);GO:0005657(replication fork);GO:0005694(chromosome);GO:0006508(proteolysis);GO:0006974(cellular response to DNA damage stimulus);GO:0008233(peptidase activity);GO:0016787(hydrolase activity);GO:0018142(protein-DNA covalent cross-linking);GO:0045830(positive regulation of isotype switching);GO:0097681(doubl…	NA	NA	NA	5-hydroxymethylcytosine binding, ES cell specific [Source:HGNC Symbol;Acc:HGNC:24446]	protein_coding	4.94531	4.91344	6.31412	2.84432	4.03886	2.26762	4.41745	2.39448	3.51702	3.81651	2.64407	4.12661	2.36548	3.7261	3.02562	3.76378	5.76154	5.37337	4.83059	4.89071	6.23027	4.36433	4.6868	6.48878	0.693476	-0.528082	0.00112748	0.073282	down	no
MSTRG.64884	FBLL1	ENST00000338333	GO:0000494(box C/D snoRNA 3'-end processing);GO:0001650(fibrillar center);GO:0001835(blastocyst hatching);GO:0003723(RNA binding);GO:0005634(nucleus);GO:0005654(nucleoplasm);GO:0005730(nucleolus);GO:0006364(rRNA processing);GO:0008168(methyltransferase activity);GO:0008649(rRNA methyltransferase activity);GO:0015030(Cajal body);GO:0016740(transferase activity);GO:0031167(rRNA methylation);GO:0031…	NA	NA	NA	fibrillarin like 1 [Source:HGNC Symbol;Acc:HGNC:35458]	protein_coding	0.075197	0.017034	0.065098	0.096458	0.104158	0.228534	0	0.154458	0.342822	0.31852	0	0.208783	0.247758	0.158113	0.038332	0.065491	1.85087	0.029285	0.176266	0.151173	0.190434	0.882431	0.296654	1.85631	0.195158	-2.35728	0.00113302	0.0735216	down	no
MSTRG.6206	SH3GLB1	ENST00000616170;ENST00000370558;ENST00000535010;ENST00000482504	GO:0000139(Golgi membrane);GO:0000421(autophagosome membrane);GO:0005504(fatty acid binding);GO:0005515(protein binding);GO:0005737(cytoplasm);GO:0005739(mitochondrion);GO:0005741(mitochondrial outer membrane);GO:0005794(Golgi apparatus);GO:0005829(cytosol);GO:0006654(phosphatidic acid biosynthetic process);GO:0006914(autophagy);GO:0006915(apoptotic process);GO:0008289(lipid binding);GO:0008654(p…	04140(Autophagy - animal);04144(Endocytosis);04144(Endocytosis)	K11248	NA	SH3 domain containing GRB2 like, endophilin B1 [Source:HGNC Symbol;Acc:HGNC:10833]	protein_coding	6.21032	5.92301	6.18017	3.32544	6.21983	2.69951	4.74004	2.03444	5.20652	3.1923	4.03609	3.56016	3.69229	3.00388	2.93152	3.65645	7.41536	8.6979	4.99133	6.6824	5.42016	9.63453	4.81898	5.39828	0.627717	-0.671814	0.00113865	0.0738335	down	no
MSTRG.57420	RPL35A	ENST00000647248;ENST00000448864	GO:0000049(tRNA binding);GO:0000184(nuclear-transcribed mRNA catabolic process, nonsense-mediated decay);GO:0002181(cytoplasmic translation);GO:0003723(RNA binding);GO:0003735(structural constituent of ribosome);GO:0005515(protein binding);GO:0005829(cytosol);GO:0005840(ribosome);GO:0006364(rRNA processing);GO:0006412(translation);GO:0006413(translational initiation);GO:0006614(SRP-dependent cotr…	03010(Ribosome);03010(Ribosome)	K02917	NA	ribosomal protein L35a [Source:HGNC Symbol;Acc:HGNC:10345]	protein_coding	16.4662	12.9754	18.1864	5.47274	11.7464	3.64525	8.96613	4.15058	11.6968	9.15225	5.84597	6.41367	4.67411	14.1985	3.55836	6.94232	18.3598	15.8585	12.2256	14.2756	18.4092	13.0144	14.3098	18.8204	0.575106	-0.7981	0.00114425	0.0739347	down	no
MSTRG.14200	MUC6	ENST00000421673;ENST00000525923	GO:0002223(stimulatory C-type lectin receptor signaling pathway);GO:0005201(extracellular matrix structural constituent);GO:0005515(protein binding);GO:0005576(extracellular region);GO:0005796(Golgi lumen);GO:0005886(plasma membrane);GO:0016266(O-glycan processing);GO:0030277(maintenance of gastrointestinal epithelium);GO:0030277(maintenance of gastrointestinal epithelium)	NA	K22023	NA	mucin 6, oligomeric mucus/gel-forming [Source:HGNC Symbol;Acc:HGNC:7517]	protein_coding	0.48769	0.443676	0.548984	1.26232	1.48675	0.695104	0.930666	2.30242	1.65805	0.632574	0.236737	0.507368	0.939379	0.549519	1.9756	0.973716	0.511354	0.105812	0.578945	0.749159	0.505457	0.265651	0.525828	0.688012	1.98851	0.991687	0.00114805	0.0740157	up	no
MSTRG.29148	STRA6	ENST00000616000;ENST00000574278;ENST00000323940;ENST00000395105;ENST00000563965;ENST00000572785;ENST00000432245;ENST00000535552;ENST00000416286;ENST00000423167;ENST00000571341	GO:0001523(retinoid metabolic process);GO:0001568(blood vessel development);GO:0001822(kidney development);GO:0003184(pulmonary valve morphogenesis);GO:0003281(ventricular septum development);GO:0005886(plasma membrane);GO:0005887(integral component of plasma membrane);GO:0007507(heart development);GO:0007612(learning);GO:0007631(feeding behavior);GO:0016020(membrane);GO:0016021(integral componen…	NA	K23088	NA	signaling receptor and transporter of retinol STRA6 [Source:HGNC Symbol;Acc:HGNC:30650]	protein_coding	0.10446	0.147179	0.0950106	0.094734	0.231651	0.386499	0.395182	0.0536574	0.0674099	0.117291	0.0746286	0.687423	0.056206	0.101703	0.0917367	0.0631466	1.59225	0.106381	1.5523	0.211398	0.429975	0.535581	0.0524638	0.513919	0.27711	-1.85147	0.00115711	0.0743746	down	no
MSTRG.23395	COMMD6	ENST00000406936;ENST00000377619;ENST00000377615;ENST00000355801	GO:0005515(protein binding);GO:0005634(nucleus);GO:0005737(cytoplasm);GO:0032088(negative regulation of NF-kappaB transcription factor activity);GO:0051059(NF-kappaB binding);GO:0051059(NF-kappaB binding)	NA	K22562	NA	COMM domain containing 6 [Source:HGNC Symbol;Acc:HGNC:24015]	protein_coding	3.70608	2.11652	2.92347	1.35456	2.71686	1.40848	3.20076	1.72824	1.98766	2.18096	1.88747	1.84964	1.53639	1.86206	1.07065	1.93481	3.32712	2.58594	3.07885	4.09281	3.47226	3.38305	2.25134	2.74015	0.671131	-0.575334	0.00115813	0.0743746	down	no
MSTRG.76406	COL14A1	ENST00000309791;ENST00000440844;ENST00000297848;ENST00000523142;ENST00000434620	GO:0003723(RNA binding);GO:0005201(extracellular matrix structural constituent);GO:0005515(protein binding);GO:0005518(collagen binding);GO:0005576(extracellular region);GO:0005581(collagen trimer);GO:0005596(collagen type XIV trimer);GO:0005614(interstitial matrix);GO:0005615(extracellular space);GO:0005788(endoplasmic reticulum lumen);GO:0007155(cell adhesion);GO:0030020(extracellular matrix st…	04974(Protein digestion and absorption);04974(Protein digestion and absorption)	K08133	NA	collagen type XIV alpha 1 chain [Source:HGNC Symbol;Acc:HGNC:2191]	protein_coding	7.80852	6.92004	11.7746	1.09729	5.66683	1.4626	2.85227	1.48192	3.24333	4.05328	1.68925	3.01381	1.74994	8.34484	2.43954	2.89376	4.00623	14.3175	15.3712	21.6437	42.5705	1.65068	3.98173	0.6872	0.318971	-1.6485	0.00115859	0.0743746	down	no
MSTRG.44717	IL37	ENST00000263326;ENST00000353225;ENST00000352179;ENST00000349806	GO:0002437(inflammatory response to antigenic stimulus);GO:0005125(cytokine activity);GO:0005149(interleukin-1 receptor binding);GO:0005515(protein binding);GO:0005576(extracellular region);GO:0005615(extracellular space);GO:0005634(nucleus);GO:0005654(nucleoplasm);GO:0005737(cytoplasm);GO:0005829(cytosol);GO:0006954(inflammatory response);GO:0006955(immune response);GO:0010628(positive regulatio…	04060(Cytokine-cytokine receptor interaction);04060(Cytokine-cytokine receptor interaction)	K05485	NA	interleukin 37 [Source:HGNC Symbol;Acc:HGNC:15563]	protein_coding	0.119953	0.200657	0.092193	0.011763	0.0538921	0.649855	0.0447155	0.011229	0.010889	0.027856	0.216288	0.0267046	0.07737	0.025136	0.18962	0.004491	0.645092	0.008237	0.563388	0.0550776	0.0827977	0.77789	0.007021	5.82953	0.110591	-3.17669	0.0011646	0.074653	down	no
MSTRG.49999	ATP5PF	ENST00000400093;ENST00000400094;ENST00000400087;ENST00000457143;ENST00000400099;ENST00000400090;ENST00000284971	GO:0000276(mitochondrial proton-transporting ATP synthase complex, coupling factor F(o));GO:0005515(protein binding);GO:0005615(extracellular space);GO:0005739(mitochondrion);GO:0005743(mitochondrial inner membrane);GO:0005753(mitochondrial proton-transporting ATP synthase complex);GO:0006754(ATP biosynthetic process);GO:0006811(ion transport);GO:0009986(cell surface);GO:0010460(positive regulati…	00190(Oxidative phosphorylation);04714(Thermogenesis);05010(Alzheimer disease);05012(Parkinson disease);05016(Huntington disease);05016(Huntington disease)	NA	NA	ATP synthase peripheral stalk subunit F6 [Source:HGNC Symbol;Acc:HGNC:847]	protein_coding	3.00502	3.43895	2.45205	1.3368	2.43643	1.3539	2.28949	1.29431	1.53318	1.43619	3.44825	2.55652	1.30823	3.26554	1.08797	1.95983	4.36805	4.62093	3.25022	3.24839	2.37567	4.08266	2.86233	3.98639	0.593907	-0.751692	0.00117898	0.0751993	down	no
MSTRG.65276	CANX	ENST00000504734;ENST00000247461;ENST00000452673;ENST00000507307;ENST00000508787;ENST00000509563;ENST00000502498;ENST00000513246	GO:0002474(antigen processing and presentation of peptide antigen via MHC class I);GO:0003723(RNA binding);GO:0005509(calcium ion binding);GO:0005515(protein binding);GO:0005737(cytoplasm);GO:0005783(endoplasmic reticulum);GO:0005788(endoplasmic reticulum lumen);GO:0005789(endoplasmic reticulum membrane);GO:0005790(smooth endoplasmic reticulum);GO:0005791(rough endoplasmic reticulum);GO:0005840(r…	04141(Protein processing in endoplasmic reticulum);04145(Phagosome);04612(Antigen processing and presentation);04918(Thyroid hormone synthesis);05166(Human T-cell leukemia virus 1 infection);05166(Human T-cell leukemia virus 1 infection)	NA	NA	calnexin [Source:HGNC Symbol;Acc:HGNC:1473]	protein_coding	26.0854	27.768	23.327	8.105	25.1181	9.0916	22.8829	11.1759	13.0174	17.4479	26.2305	20.0001	7.60962	18.0096	9.11574	16.8261	38.9829	35.813	24.1881	20.3534	18.1393	43.8383	18.1377	55.5423	0.552581	-0.855741	0.00118122	0.0751993	down	no
MSTRG.58683	SGCB	ENST00000381431	GO:0005515(protein binding);GO:0005737(cytoplasm);GO:0005856(cytoskeleton);GO:0005886(plasma membrane);GO:0005887(integral component of plasma membrane);GO:0007517(muscle organ development);GO:0016010(dystrophin-associated glycoprotein complex);GO:0016011(dystroglycan complex);GO:0016012(sarcoglycan complex);GO:0016020(membrane);GO:0016021(integral component of membrane);GO:0042383(sarcolemma);GO…	05410(Hypertrophic cardiomyopathy (HCM));05412(Arrhythmogenic right ventricular cardiomyopathy (ARVC));05414(Dilated cardiomyopathy (DCM));05416(Viral myocarditis)	NA	NA	sarcoglycan beta [Source:HGNC Symbol;Acc:HGNC:10806]	protein_coding	1.53571	1.82978	2.77492	1.35542	2.41399	0.894952	1.11657	0.583308	1.55171	1.43953	1.22796	1.80966	1.63023	1.98932	0.633556	1.87791	3.10059	1.96516	2.25961	2.84045	3.74731	4.14324	2.01998	1.51174	0.571254	-0.807796	0.00118312	0.0751993	down	no
MSTRG.66578	PACSIN1	ENST00000620693;ENST00000538621;ENST00000374043	GO:0005515(protein binding);GO:0005543(phospholipid binding);GO:0005737(cytoplasm);GO:0005768(endosome);GO:0005829(cytosol);GO:0005856(cytoskeleton);GO:0005886(plasma membrane);GO:0006897(endocytosis);GO:0007010(cytoskeleton organization);GO:0007015(actin filament organization);GO:0008092(cytoskeletal protein binding);GO:0008289(lipid binding);GO:0016020(membrane);GO:0016301(kinase activity);GO:0…	NA	K20123	NA	protein kinase C and casein kinase substrate in neurons 1 [Source:HGNC Symbol;Acc:HGNC:8570]	protein_coding	0.157999	0.0924934	0.132644	0.0523146	0.0692027	0.0981774	0.180634	0.157091	0.126842	0.131964	0.0402021	0.112288	0.080152	0.0434481	0.130872	0.200629	0.197524	0.115936	0.245398	0.209487	0.445746	0.197165	0.336331	0.1878	0.466819	-1.09906	0.0011861	0.0751993	down	no
MSTRG.53978	CYB561D2;Z84492	ENST00000232508;ENST00000425346;ENST00000606589;ENST00000424512;ENST00000418577	GO:0004322(ferroxidase activity);GO:0005515(protein binding);GO:0005783(endoplasmic reticulum);GO:0005789(endoplasmic reticulum membrane);GO:0016020(membrane);GO:0016021(integral component of membrane);GO:0016491(oxidoreductase activity);GO:0020037(heme binding);GO:0030659(cytoplasmic vesicle membrane);GO:0031410(cytoplasmic vesicle);GO:0031982(vesicle);GO:0046872(metal ion binding);GO:0055114(ox…	NA	K08371	NA	cytochrome b561 family member D2 [Source:HGNC Symbol;Acc:HGNC:30253];novel protein	protein_coding	4.53756	3.46737	1.89459	2.93304	3.2361	1.82387	2.43592	2.30614	1.93223	2.05868	1.60634	1.70834	2.89768	3.38592	1.57798	1.88786	1.7959	1.46018	1.39273	1.36933	2.73887	1.12679	2.82275	0.973172	1.45068	0.536725	0.0011876	0.0751993	up	no
MSTRG.21603	RITA1	ENST00000615042;ENST00000548278;ENST00000552495;ENST00000549621	GO:0000122(negative regulation of transcription by RNA polymerase II);GO:0005515(protein binding);GO:0005634(nucleus);GO:0005654(nucleoplasm);GO:0005737(cytoplasm);GO:0005813(centrosome);GO:0005815(microtubule organizing center);GO:0005856(cytoskeleton);GO:0007219(Notch signaling pathway);GO:0007399(nervous system development);GO:0015631(tubulin binding);GO:0022008(neurogenesis);GO:0045746(negati…	NA	NA	NA	RBPJ interacting and tubulin associated 1 [Source:HGNC Symbol;Acc:HGNC:25925]	protein_coding	2.6304	2.96284	3.25975	2.09174	1.51232	1.08268	2.48309	2.22266	1.60064	2.78361	2.37497	3.15946	1.47779	3.7743	1.59251	1.86931	3.55851	3.37022	2.89321	4.12958	3.00799	5.05504	3.16284	4.98516	0.611322	-0.709996	0.00119188	0.0751993	down	no
MSTRG.64073	PITX1	ENST00000265340;ENST00000502676	GO:0000790(nuclear chromatin);GO:0000978(RNA polymerase II cis-regulatory region sequence-specific DNA binding);GO:0000981(DNA-binding transcription factor activity, RNA polymerase II-specific);GO:0001085(RNA polymerase II transcription factor binding);GO:0001228(DNA-binding transcription activator activity, RNA polymerase II-specific);GO:0001501(skeletal system development);GO:0003677(DNA bindin…	NA	K09356	NA	paired like homeodomain 1 [Source:HGNC Symbol;Acc:HGNC:9004]	protein_coding	0.986889	1.1484	0.411825	0.154793	0.106803	0.638664	0.56451	0.294089	0.893237	0.2898	0.816544	0.154488	0.291564	0.150785	0.311342	0.0979951	5.62345	0.222771	0.409239	0.0929558	0.338502	5.13236	0.264514	2.33784	0.253499	-1.97995	0.0011924	0.0751993	down	no
MSTRG.7132	HMGCS2	ENST00000369406	GO:0003824(catalytic activity);GO:0004421(hydroxymethylglutaryl-CoA synthase activity);GO:0005739(mitochondrion);GO:0005759(mitochondrial matrix);GO:0006084(acetyl-CoA metabolic process);GO:0006629(lipid metabolic process);GO:0006694(steroid biosynthetic process);GO:0006695(cholesterol biosynthetic process);GO:0008202(steroid metabolic process);GO:0008203(cholesterol metabolic process);GO:0008299…	00072(Synthesis and degradation of ketone bodies);00280(Valine, leucine and isoleucine degradation);00650(Butanoate metabolism);00900(Terpenoid backbone biosynthesis);03320(PPAR signaling pathway)	K01641	EC:2.3.3.10	3-hydroxy-3-methylglutaryl-CoA synthase 2 [Source:HGNC Symbol;Acc:HGNC:5008]	protein_coding	1.37403	0.223318	0.318321	0.2184	0.482308	0.303873	9.5633	0.270624	0.446868	0.514241	9.43762	0.889031	0.0560292	1.22301	0	0.323386	0.0140203	0.242421	0	0.399211	0.102531	0.330729	0.438441	0	8.39503	3.06954	0.00119312	0.0751993	up	no
MSTRG.21402	ALDH1L2	ENST00000652515;ENST00000548418;ENST00000258494	GO:0003824(catalytic activity);GO:0004029(aldehyde dehydrogenase (NAD+) activity);GO:0005654(nucleoplasm);GO:0005737(cytoplasm);GO:0005739(mitochondrion);GO:0005759(mitochondrial matrix);GO:0006730(one-carbon metabolic process);GO:0009058(biosynthetic process);GO:0009258(10-formyltetrahydrofolate catabolic process);GO:0016155(formyltetrahydrofolate dehydrogenase activity);GO:0016491(oxidoreductas…	00670(One carbon pool by folate);00670(One carbon pool by folate)	K00289	EC:1.5.1.6	aldehyde dehydrogenase 1 family member L2 [Source:HGNC Symbol;Acc:HGNC:26777]	protein_coding	1.0664	0.965099	0.846131	0.324909	0.668681	0.272845	0.614916	0.227374	0.668518	0.505024	0.331371	0.571818	0.223714	0.514974	0.382718	0.691986	0.648011	1.93469	1.16876	1.3292	1.99276	0.639377	0.682649	0.383073	0.505579	-0.98399	0.00119663	0.0752551	down	no
MSTRG.32430	PSMD7	ENST00000568615;ENST00000219313	GO:0000165(MAPK cascade);GO:0000209(protein polyubiquitination);GO:0000502(proteasome complex);GO:0002223(stimulatory C-type lectin receptor signaling pathway);GO:0002479(antigen processing and presentation of exogenous peptide antigen via MHC class I, TAP-dependent);GO:0005515(protein binding);GO:0005576(extracellular region);GO:0005634(nucleus);GO:0005654(nucleoplasm);GO:0005829(cytosol);GO:000…	03050(Proteasome);05169(Epstein-Barr virus infection);05169(Epstein-Barr virus infection)	NA	NA	proteasome 26S subunit, non-ATPase 7 [Source:HGNC Symbol;Acc:HGNC:9565]	protein_coding	4.66095	3.41686	4.23288	1.90804	3.13422	1.62774	3.69626	2.18119	3.23777	3.48351	4.4051	4.48988	2.2176	5.07251	1.14178	3.10913	5.42787	5.81002	7.09189	3.76821	4.16642	6.8782	6.04134	3.64297	0.607275	-0.719578	0.00120732	0.0756259	down	no
[truncated: 16,865 more rows]
