# Supplementary material for: Molecular characterization of early-stage multi-primary lung adenocarcinoma by transcriptome sequencing—a retrospective study
Source: PeerJ. 2026 Jan 15;14:e20617. doi: 10.7717/peerj.20617 (PMC12812280; doi:10.7717/peerj.20617)
Supplement: Supplemental Information 3 [file peerj-14-20617-s003.xlsx]

## Sheet: Sheet1
Sample	Raw Data		Valid Data		Valid Ratio(reads)	Q20%	Q30%	GC content%
	Read	Base	Read	Base
S_3_T	95103366	14.27G	83698718	12.55G	88.01	99.96	97.01	51.5
M_8_T1	74768912	11.22G	66257136	9.94G	88.62	99.97	97.4	50.5
M_8_T2	81881188	12.28G	72223320	10.83G	88.21	99.96	97.2	50.5
M_1_T2	76218834	11.43G	67783570	10.17G	88.93	99.96	97.02	50.5
M_3_T1	94185772	14.13G	77599208	11.64G	82.39	99.95	96.17	59.5
M_3_T2	69125818	10.37G	61434284	9.22G	88.87	99.96	97.31	49.5
S_8_T	95375886	14.31G	83210500	12.48G	87.24	99.96	97	52.5
M_7_T2	88776024	13.32G	73810440	11.07G	83.14	99.93	95.36	62
S_4_T	96127814	14.42G	82260034	12.34G	85.57	99.96	96.89	52.5
S_1_T	89340004	13.40G	78432282	11.76G	87.79	99.96	97.11	50.5
M_1_T1	95070236	14.26G	83635792	12.55G	87.97	99.95	97.1	53
M_2_T1	89018110	13.35G	74355534	11.15G	83.53	99.94	96.12	59
M_2_T2	89309904	13.40G	76242480	11.44G	85.37	99.96	96.92	53.5
M_5_T1	72667192	10.90G	63494990	9.52G	87.38	99.95	96.98	53
M_4_T1	78777724	11.82G	69130244	10.37G	87.75	99.96	96.94	52.5
M_4_T2	68972544	10.35G	60118020	9.02G	87.16	99.96	96.9	55
M_7_T1	71970840	10.80G	58088298	8.71G	80.71	99.94	95.89	59
S_5_T	89279176	13.39G	76392516	11.46G	85.57	99.96	97.14	52
S_2_T	93873988	14.08G	83248702	12.49G	88.68	99.96	97.29	50
M_5_T2	88723966	13.31G	77436542	11.62G	87.28	99.95	96.91	52.5
M_6_T1	76450862	11.47G	66053518	9.91G	86.4	99.94	95.99	59.5
M_6_T2	89100374	13.37G	77758902	11.66G	87.27	99.95	96.91	54
S_7_T	71709560	10.76G	61492856	9.22G	85.75	99.95	96.81	52.5
S_6_T	86662816	13.00G	75735150	11.36G	87.39	99.96	96.94	49.5
