# Supplementary material for: Molecular characterization of early-stage multi-primary lung adenocarcinoma by transcriptome sequencing—a retrospective study
Source: PeerJ. 2026 Jan 15;14:e20617. doi: 10.7717/peerj.20617 (PMC12812280; doi:10.7717/peerj.20617)
Supplement: Supplemental Information 6 [file peerj-14-20617-s006.xlsx]

## Sheet: Sheet1
ITEM TO CHECK	IMPORTANCE	CHECKLIST
EXPERIMENTAL DESIGN
Definition of experimental and control groups	E	Line 175
Number within each group	E	Line 175
Assay carried out by core lab or investigator's lab?	D
Acknowledgement of authors' contributions	D
SAMPLE
Description	E
Volume/mass of sample processed	D	Line 97
Microdissection or macrodissection	E	Line 97
Processing procedure	E
If frozen - how and how quickly?	E	Lines 96-98
If fixed - with what, how quickly?	E	Lines 96-98
Sample storage conditions and duration (especially for FFPE samples)	E	Lines 98-99
NUCLEIC ACID EXTRACTION
Procedure and/or instrumentation	E
Name of kit and details of any modifications	E	Lines 129-130
Source of additional reagents used	D
Details of DNase or RNAse treatment	E	Line 129
Contamination assessment (DNA or RNA)	E	Line 131
Nucleic acid quantification	E
Instrument and method	E	Lines 130-132
Purity (A260/A280)	D
Yield	D
RNA integrity method/instrument	E
RIN/RQI or Cq of 3' and 5' transcripts	E	Lines 130-132
Electrophoresis traces	D
Inhibition testing (Cq dilutions, spike or other)	E	Use a diluted sample
REVERSE TRANSCRIPTION
Complete reaction conditions	E
Amount of RNA and reaction volume	E	2μg;20μL
Priming oligonucleotide (if using GSP) and concentration	E	2μL
Reverse transcriptase and concentration	E	1μL
Temperature and time	E	37℃ for 60 min
Manufacturer of reagents and catalogue numbers	D
Cqs with and without RT	D*
Storage conditions of cDNA	D
qPCR TARGET INFORMATION
If multiplex, efficiency and LOD of each assay.	E	No
Sequence accession number	E	DUOX1: NM_017434 CACNA2D2: NM_001005505 GPX8:NM_001008397 COL1A2: NM_000089 COL1A1: NM_000088
Location of amplicon	D
Amplicon length	E	70-200bp
In silico specificity screen (BLAST, etc)	E	Prime BLAST
Pseudogenes, retropseudogenes or other homologs?	D
Sequence alignment	D
Secondary structure analysis of amplicon	D
Location of each primer by exon or intron (if applicable)	E	NO
What splice variants are targeted?	E	DUOX1: NM_017434.5 CACNA2D2: NM_001005505.3 GPX8: NM_001008397.4 COL1A2: NM_000089.4 COL1A1: NM_000088.4
qPCR OLIGONUCLEOTIDES
Primer sequences	E	Table 1
RTPrimerDB Identification Number	D
Probe sequences	D**
Location and identity of any modifications	E	Not modification
Manufacturer of oligonucleotides	D	Tsingke biotechnology
Purification method	D	PAGE
qPCR PROTOCOL
Complete reaction conditions	E
Reaction volume and amount of cDNA/DNA	E	2μL
Primer, (probe), Mg++ and dNTP concentrations	E	Forward primer 0.5μL; Reverse primer 0.5μL; Mg++ 3μL; dNTP 4μL
Polymerase identity and concentration	E	0.4μL
Buffer/kit identity and manufacturer	E	Line 134
Exact chemical constitution of the buffer	D
Additives (SYBR Green I, DMSO, etc.)	E	SYBR Green I, DMSO
Manufacturer of plates/tubes and catalog number	D
Complete thermocycling parameters	E	Lines 135-137
Reaction setup (manual/robotic)	D
Manufacturer of qPCR instrument	E	Line 134
qPCR VALIDATION
Evidence of optimisation (from gradients)	D
Specificity (gel, sequence, melt, or digest)	E	melt
For SYBR Green I, Cq of the NTC	E	Undetermined
Standard curves with slope and y-intercept	E
PCR efficiency calculated from slope	E	-3.3
Confidence interval for PCR efficiency or standard error	D
r2 of standard curve	E	R2≥0.99
Linear dynamic range	E
Cq variation at lower limit	E	technical replicates
Confidence intervals throughout range	D
Evidence for limit of detection	E	Gradient diluted samples of the target were prepared
If multiplex, efficiency and LOD of each assay.	E	No
DATA ANALYSIS
qPCR analysis program (source, version)	E
Cq method determination	E	Default device parameters
Outlier identification and disposition	E	Optimization of data
Results of NTCs	E	Undetermined
Justification of number and choice of reference genes	E	Line 137
Description of normalisation method	E	Lines 137-138
Number and concordance of biological replicates	D
Number and stage (RT or qPCR) of technical replicates	E	Line 145
Repeatability (intra-assay variation)	E	Line 145
Reproducibility (inter-assay variation, %CV)	D
Power analysis	D
Statistical methods for result significance	E	Lines 143-145
Software (source, version)	E	Line 145
Cq or raw data submission using RDML	D
Table 1. MIQE checklist for authors, reviewers and editors. All essential information (E) must be submitted with the manuscript. Desirable
information (D) should be submitted if available. If using primers obtained from RTPrimerDB, information on qPCR target, oligonucleotides,
protocols and validation is available from that source.
*: Assessing the absence of DNA using a no RT assay is essential when first extracting RNA. Once the sample has been validated as
RDNA-free, inclusion of a no-RT control is desirable, but no longer essential.
**: Disclosure of the probe sequence is highly desirable and strongly encouraged. However, since not all commercial pre-designed assay
vendors provide this information, it cannot be an essential requirement. Use of such assays is advised against.
